# Supplementary material for: Urinary Metabolomics Revealed the Biological Characteristics Associated with Early Pregnancy in Pigs
Source: Research Square preprint supplement (doi:10.21203/rs.3.rs-903280/v1), 2021-09-17
Supplement: Supplementary file 1 [file 84089636696116c186e6795a.xls]

## Sheet: 阳离子结果表
ID	Metabolite	Metab ID	Library ID	KEGG Compound ID	M/Z	Retention time	Mode	Adducts	Formula	Fragmentation Score	Theoretical Fragmentation Score	Mass Error	CAS ID	RSD	DP12_1	DP12_2	DP12_3	DP12_4	DP12_5	DP12_6	DP12_7	DP12_8	DP15_1	DP15_2	DP15_3	DP15_4	DP15_5	DP15_6	DP15_7	DP15_8	DP9_1	DP9_2	DP9_3	DP9_4	DP9_5	DP9_6	DP9_7	DP9_8	DP0_1	DP0_2	DP0_3	DP0_4	DP0_5	DP0_6	DP0_7	DP0_8	QC01	QC02	QC03
pos_1	metab_0	metab_0	-	-	340.101	1.977	pos	-	-	-	-	-	-	0.0019	7.1449	7.1184	7.3943	6.3121	7.1143	6.3118	6.9654	7.3449	6.9351	7.204	7.3467	6.6849	6.7478	7.516	7.4943	7.4518	7.2182	7.3937	7.5263	7.1184	7.4818	4.704	7.043	7.4776	6.856	7.2589	7.2359	6.9348	6.6291	6.896	6.9271	6.9308	7.2605	7.2863	7.2978
pos_2	metab_1	metab_1	-	-	233.091	2.3397	pos	-	-	-	-	-	-	0.0024	6.4199	6.4826	6.3199	5.9019	6.2195	5.7101	6.5601	6.5684	6.4299	6.5647	6.8389	6.0809	6.1921	6.9352	6.9093	6.8832	6.4669	6.8146	6.848	6.6484	6.6087	6.8258	6.5661	6.7373	6.5342	6.8118	6.7709	6.6308	6.8146	6.6411	6.6854	6.6752	6.753	6.7319	6.7527
pos_3	metab_2	metab_2	-	-	340.101	1.4616	pos	-	-	-	-	-	-	0.0035	5.4319	5.8169	5.8712	4.7385	4.9338	4.7402	5.6747	5.6456	5.7567	5.8203	5.1708	5.2823	5.6288	6.1151	6.0664	6.0349	5.6341	5.4995	5.808	6.2004	5.912	5.1988	5.6667	5.9586	5.2307	5.7409	5.7026	5.4844	5.4685	5.5403	5.6539	5.6131	5.8329	5.848	5.8177
pos_4	metab_3	metab_3	-	-	245.091	2.79	pos	-	-	-	-	-	-	0.0011	5.5063	5.9805	5.3128	4.9434	5.2796	4.7092	5.7223	5.7754	5.6301	5.576	5.8988	5.3612	5.2254	6.0844	5.9712	5.991	5.5991	5.6729	5.9125	5.6369	5.8869	6.0632	5.364	5.9012	5.6782	5.7288	5.5775	5.4962	6.0251	5.6749	5.8016	5.7008	5.8357	5.826	5.8291
pos_5	metab_4	metab_4	-	-	383.111	2.8933	pos	-	-	-	-	-	-	0.0034	5.1502	5.7903	5.4587	4.7585	5.2416	3.9889	5.553	5.6457	4.9101	5.347	5.8324	5.2695	5.4784	6.0001	5.9088	5.9531	5.4395	5.8904	5.688	5.8166	5.7636	3.3246	5.4013	5.8114	5.2597	5.6247	5.4748	5.3253	5.444	5.3786	5.4773	5.3997	5.7046	5.6765	5.7156
pos_6	metab_5	metab_5	-	-	338.086	1.756	pos	-	-	-	-	-	-	0.0018	7.3547	7.5847	7.5927	6.8535	7.0415	6.8938	7.4226	7.6507	7.3559	7.4064	7.5557	6.9697	7.2279	7.4045	7.5074	7.4367	7.5742	7.7404	7.5819	7.3193	7.6836	5.0955	7.5859	7.6691	7.0158	7.5625	7.4875	7.3596	6.8306	7.2064	7.2208	7.2611	7.4465	7.4538	7.462
pos_7	metab_6	metab_6	-	-	226.081	0.6304	pos	-	-	-	-	-	-	0.0016	4.8229	4.5764	4.5998	4.1111	5.1235	4.4356	4.5726	4.7489	4.6231	4.6593	4.5626	4.4821	4.4588	5.906	5.6371	5.8213	4.7406	4.5542	4.5609	4.7761	4.6543	6.4942	4.719	4.7587	4.6213	4.8692	4.7354	4.5178	4.7306	4.6363	4.7078	4.6995	5.492	5.4828	5.5043
pos_8	metab_7	metab_7	-	-	217.118	0.7248	pos	-	-	-	-	-	-	0.0015	5.6634	5.6623	5.8368	5.4243	5.7516	5.4137	5.7278	5.7827	5.7062	5.7382	5.6703	5.5621	5.7771	5.9773	5.8411	5.9462	5.7807	5.8569	5.9687	5.9668	5.7127	5.8112	5.7883	5.8177	5.7091	5.8608	5.8142	5.6108	5.844	5.8191	5.8577	5.8335	5.8417	5.8613	5.8449
pos_9	metab_8	metab_8	-	-	247.128	0.7051	pos	-	-	-	-	-	-	0.006	5.3273	5.4326	5.3177	4.9541	5.3467	4.9813	5.3399	5.3948	5.3179	5.2002	5.4562	5.1491	5.1677	5.2439	5.454	5.2468	5.2862	5.4236	5.3836	5.429	5.3626	5.5166	5.2219	5.3909	5.4105	5.3556	5.5601	5.3857	5.6524	5.5369	5.5782	5.5373	5.3521	5.3588	5.3313
pos_10	Hypoxanthine	metab_9	HMDB0000157	C00262	137.045	0.6852	pos	M+H, M+K, M+Na, 2M+H, M+H-H2O	C5H4N4O	85.4	-	-3.53979	68-94-0	0.0021	6.636	6.5459	6.1107	6.2794	6.4499	6.161	5.5145	6.4496	6.8285	6.6549	6.5568	6.2365	5.5425	5.8437	6.5179	6.1697	6.6732	6.6859	6.6111	6.4711	5.9174	6.9722	6.7201	6.3604	5.8835	6.1771	6.0356	6.6913	6.5906	6.3398	6.3863	6.4087	6.5091	6.5287	6.5007
pos_11	metab_10	metab_10	-	-	215.091	1.3595	pos	-	-	-	-	-	-	0.004	4.2845	4.4882	4.1806	3.6687	4.0309	3.5961	4.1808	4.4246	4.2802	4.2045	4.6678	3.9857	4.2673	4.7593	4.6567	4.6584	4.1087	4.3869	4.451	4.5235	4.5465	4.5821	4.0134	4.5836	4.4451	5.255	5.0065	4.8047	5.183	4.9726	5.0204	5.0423	4.7728	4.7386	4.7217
pos_12	metab_11	metab_11	-	-	330.165	1.6153	pos	-	-	-	-	-	-	0.0013	5.2498	5.6055	5.335	4.7264	5.2649	4.8801	5.3977	5.6661	5.3852	5.5499	5.7439	5.2039	4.8986	5.584	5.7368	5.5521	5.6107	5.9793	5.7811	5.8699	5.9528	5.9926	5.577	5.9557	5.2302	5.5125	5.4343	5.2831	5.3679	5.2585	5.3409	5.2778	5.6291	5.6141	5.6167
pos_13	Phenylacetylglycine	metab_12	HMDB0000821	C05598	194.081	2.118	pos	M+H, M+K, M+Na, 2M+H, M+H-H2O	C10H11NO3	90.5	-	-3.37854	500-98-1	0.0009	6.7562	6.8049	6.7693	6.1731	6.5526	6.1987	6.7977	6.9239	6.7647	6.7372	6.8	6.5105	6.5593	6.9888	6.9511	6.9614	6.8142	7.1237	7.0213	7.0027	6.8614	7.0754	6.7314	6.9843	6.5031	6.785	6.8113	6.7277	6.7104	6.6325	6.6803	6.6458	6.8796	6.8803	6.8919
pos_14	metab_13	metab_13	-	-	307.078	2.4219	pos	-	-	-	-	-	-	0.0032	6.1499	5.9369	6.1338	5.2433	5.7666	5.4882	6.1011	6.0933	6.226	6.134	6.1356	5.8025	5.819	5.7261	5.9041	6.0534	6.1403	5.9404	5.8989	6.2347	6.1216	4.1268	6.1474	6.0618	5.3915	5.7178	5.8328	6.0445	5.5957	5.7544	5.6919	5.7639	6.0398	5.9962	6.0264
pos_15	metab_14	metab_14	-	-	270.169	3.3245	pos	-	-	-	-	-	-	0.0029	5.9017	6.2441	6.068	5.509	6.0209	5.2325	5.9616	6.2554	5.951	6.0088	6.3635	5.5892	5.7566	6.367	6.3536	6.2953	6.1128	6.4756	6.4805	6.5012	6.3225	6.5538	6.1006	6.4658	6.0085	6.2856	6.3171	6.0198	6.2977	6.0344	6.1454	6.1266	6.2887	6.2612	6.2683
pos_16	metab_15	metab_15	-	-	415.195	3.6524	pos	-	-	-	-	-	-	0.0045	4.3048	5.0894	4.0352	2.9783	3.6875	2.9912	4.5355	4.8101	5.2706	4.5961	5.4578	4.306	3.9357	5.2045	5.192	5.1359	4.546	4.6239	5.1862	4.7171	5.1551	4.9369	4.1142	5.1572	4.9423	5.7231	5.7981	4.8241	5.4706	5.3044	5.4374	5.4515	5.197	5.2294	5.2597
pos_17	metab_16	metab_16	-	-	225.11	2.2995	pos	-	-	-	-	-	-	0.0031	4.9419	5.2075	4.8588	4.5669	4.7586	4.5294	4.9213	5.1562	4.9565	5.1428	5.3172	4.7948	4.8252	5.278	5.3895	5.2536	5.0324	5.2171	5.253	5.2262	5.2205	5.2595	5.0658	5.2587	4.9853	5.5973	5.453	5.2043	5.5521	5.2997	5.4061	5.3634	5.2824	5.2879	5.2564
pos_18	metab_17	metab_17	-	-	445.242	5.0058	pos	-	-	-	-	-	-	0.0014	5.2215	5.6625	4.159	4.174	4.5064	3.9299	5.2669	5.3797	5.384	3.0183	5.4867	2.8985	2.9256	5.3617	5.2118	5.2591	5.2612	4.6575	5.7706	4.8558	5.4516	4.619	4.0776	5.5943	5.1992	5.6803	5.9907	5.073	5.647	5.369	5.5009	5.4683	5.3851	5.3763	5.379
pos_19	metab_18	metab_18	-	-	399.2	4.4656	pos	-	-	-	-	-	-	0.004	5.4967	5.9439	5.2728	4.8725	5.0737	4.754	5.6315	5.8021	5.6271	5.2615	5.8539	4.927	4.7127	5.5609	5.5758	5.5267	5.7083	5.2664	6.035	5.6673	5.6808	5.4017	5.5846	5.8683	5.5271	5.9505	6.2614	5.6366	6.0323	5.6595	5.7988	5.8206	5.6928	5.6633	5.7252
pos_20	metab_19	metab_19	-	-	309.164	0.5188	pos	-	-	-	-	-	-	0.001	4.76	5.2014	4.92	5.057	4.6279	4.2658	4.8706	5.0096	4.848	4.7867	5.0999	4.9791	5.278	5.7202	5.4807	5.7021	4.9567	4.7489	5.1587	5.2016	5.0702	5.6059	4.7908	5.0987	5.173	5.4942	5.2392	4.9427	5.1341	5.3662	5.3952	5.3113	5.3339	5.3324	5.3423
pos_21	metab_20	metab_20	-	-	325.159	0.5188	pos	-	-	-	-	-	-	0.002	4.706	4.8873	4.882	4.5334	4.5992	4.4659	4.7748	4.9966	4.8097	5.0582	4.934	4.684	4.4594	4.8701	4.9402	4.9321	5.1665	5.1775	5.1143	5.201	5.2802	5.0781	5.1238	5.2069	4.593	4.7251	4.6329	4.6234	4.5665	4.6741	4.662	4.644	4.9371	4.9438	4.9222
pos_22	metab_21	metab_21	-	-	258.899	0.5391	pos	-	-	-	-	-	-	0.0025	5.4367	5.5211	4.9262	5.7685	6.3088	5.7622	6.3298	5.7107	5.8878	5.8293	5.9858	5.9895	4.7493	3.6596	5.2392	4.9032	5.9536	6.0768	5.7217	5.9624	5.794	4.9162	6.0187	5.9177	4.2321	5.343	4.9328	5.87	3.9617	4.8663	4.5912	4.8525	5.6464	5.6324	5.6238
pos_23	metab_22	metab_22	-	-	510.782	0.5391	pos	-	-	-	-	-	-	0.003	5.9306	5.6818	5.4951	5.6929	5.9506	5.7176	5.6704	5.819	6.0494	6.027	5.4493	5.9435	5.5063	4.4793	5.5028	5.3992	5.9277	4.9721	5.3043	5.5982	5.5941	5.1896	5.9842	5.2791	4.8423	5.5298	5.4203	6.0017	4.6072	5.4385	5.1955	5.3728	5.7443	5.7573	5.7185
pos_24	metab_23	metab_23	-	-	292.844	0.5584	pos	-	-	-	-	-	-	0.0039	5.5458	5.2816	5.6228	4.723	5.2254	4.8252	5.1351	5.4091	5.229	5.3374	5.3569	4.9806	5.6924	5.441	5.2687	5.4325	5.3289	5.2863	5.3525	5.4493	5.4019	4.9796	5.1776	5.3569	5.6735	5.0576	5.3609	5.4612	5.6233	5.6021	5.5334	5.5492	5.3475	5.359	5.336
pos_25	metab_24	metab_24	-	-	122.924	0.5584	pos	-	-	-	-	-	-	0.002	6.1571	5.8459	6.1564	5.6695	5.9809	5.732	5.8438	5.9471	6.0155	6.0315	5.7461	5.9107	6.199	5.915	5.8286	5.9924	5.9506	5.5123	5.6123	5.8116	5.7947	5.6125	5.9738	5.5938	6.1509	5.7378	5.9208	6.076	6.1032	6.1119	6.0428	6.0745	5.9286	5.9332	5.9041
pos_26	metab_25	metab_25	-	-	782.731	0.5584	pos	-	-	-	-	-	-	0.0041	4.881	4.858	3.5594	5.0921	5.6864	5.2042	5.592	5.1799	5.4242	5.3507	5.279	5.503	3.2646	3.5382	4.6387	3.7871	5.4236	5.1897	4.9852	5.3317	5.1219	3.8765	5.4881	5.1527	4.2477	4.6778	3.9223	5.3469	3.5945	3.8132	3.863	3.6067	5.0079	5.0086	4.9778
pos_27	metab_26	metab_26	-	-	216.95	0.4983	pos	-	-	-	-	-	-	0.0144	3.755	4.7494	3.5081	5.316	2.7315	4.6439	3.1674	2.55	4.1211	3.2327	2.3601	4.3672	4.3381	4.0132	3.4262	3.5953	3.0514	2.8825	3.3283	2.787	2.7453	3.7366	3.354	2.699	4.747	4.4161	4.5942	3.6522	3.3572	4.5733	4.6421	4.5789	3.2775	3.1951	3.3091
pos_28	metab_27	metab_27	-	-	187.125	0.4983	pos	-	-	-	-	-	-	0.003	4.5999	4.6407	4.4551	4.3618	4.4383	4.3034	4.729	4.5478	4.7232	4.5364	4.5977	4.5138	4.409	4.9451	4.738	4.9034	4.6045	4.6474	4.6262	4.5473	4.6914	5.1054	4.6004	4.617	4.6613	4.914	4.9066	4.6239	4.7358	4.7208	4.7949	4.8018	4.783	4.7537	4.7517
pos_29	metab_28	metab_28	-	-	358.833	0.5584	pos	-	-	-	-	-	-	0.0021	5.9117	5.6209	5.6799	5.4758	5.6953	5.5755	5.4219	5.6865	5.8661	5.8913	5.2832	5.727	5.6825	4.8676	5.4676	5.5149	5.7397	4.8614	5.155	5.4055	5.4325	5.1997	5.7769	5.0888	5.2347	5.439	5.5076	5.8794	5.0602	5.6095	5.4121	5.5599	5.6367	5.6503	5.6204
pos_30	metab_29	metab_29	-	-	830.652	0.5584	pos	-	-	-	-	-	-	0.0047	5.6167	5.1764	5.5917	4.8158	4.9121	4.8783	4.5879	5.324	5.3066	5.4712	4.7482	5.0621	5.6496	4.9315	5.1114	5.2218	5.0938	4.4406	4.5892	4.9232	5.0224	4.7969	5.2449	4.2521	5.39	4.8878	5.1418	5.4006	5.1789	5.3292	5.2193	5.1916	5.2254	5.2419	5.198
pos_31	metab_30	metab_30	-	-	146.06	2.503	pos	-	-	-	-	-	-	0.001	6.1244	5.7267	6.1653	4.9689	6.3364	5.3246	6.4151	6.6963	5.457	6.1413	6.9651	5.4531	5.7639	5.8491	5.9563	5.8333	6.0842	6.9789	5.6804	6.6996	6.6051	5.7729	6.0232	6.4897	5.1694	5.3779	5.7797	5.9546	6.6873	5.4235	5.5698	5.562	6.0415	6.0549	6.0412
pos_32	N-Acetyl-DL-tryptophan	metab_31	-	-	247.107	2.6685	pos	M+H, M+Na, 2M+K, M+H-H2O	C13H14N2O3	96.4	-	-3.67424	-	0.0042	5.7533	6.0653	5.8171	5.029	5.8177	5.1891	5.8738	6.1681	5.9287	5.9486	6.2538	5.5834	5.5261	6.2146	6.2279	6.162	6.077	6.301	6.2702	6.2292	6.1304	6.3287	6.0272	6.2268	5.9574	6.1272	6.247	5.9434	6.2139	6.0052	6.093	6.0191	6.1802	6.1518	6.1176
pos_33	metab_32	metab_32	-	-	237.148	3.0763	pos	-	-	-	-	-	-	0.0016	5.2495	5.4426	5.1348	4.9475	5.0931	4.9918	5.2127	5.3231	5.3981	5.3827	5.6104	5.1753	5.1656	5.5015	5.5789	5.4652	5.2792	5.2331	5.4839	5.2942	5.4055	5.514	5.1979	5.4592	5.3237	5.8654	5.7938	5.4307	5.7829	5.5894	5.6704	5.648	5.5189	5.5057	5.5131
pos_34	Diphenhydramine N-glucuronide	metab_33	HMDB0060897	-	433.206	3.3245	pos	M+H, M+Na, M+H-2H2O, M+H-H2O	C23H30NO7+	-	61.9	-9.037	-	0.0058	4.3143	5.4287	3.7709	3.9473	3.1158	3.5436	4.3831	4.6414	5.193	3.8619	5.0274	4.2351	3.2579	5.2117	5.1275	5.0449	4.6013	4.0569	5.5706	4.6105	4.9752	5.1832	3.5761	5.1975	5.095	5.9902	5.7987	5.005	5.3296	5.4531	5.5964	5.5796	5.312	5.2406	5.279
pos_35	metab_34	metab_34	-	-	315.076	3.4474	pos	-	-	-	-	-	-	0.0045	2.4651	2.5739	2.4423	2.3116	2.3869	2.3244	2.4623	3.9701	3.487	4.0243	3.5648	2.3662	4.1993	5.1378	4.9231	4.953	4.1747	4.4691	4.742	3.6883	4.6039	5.3609	4.3343	4.5469	2.4937	3.8546	4.1033	2.5713	3.4598	3.3085	3.719	3.2508	4.7454	4.7148	4.7026
pos_36	metab_35	metab_35	-	-	411.161	3.8378	pos	-	-	-	-	-	-	0.0036	5.0572	5.4023	4.937	4.3678	4.6588	4.3608	5.1568	5.4561	4.8091	4.8655	4.9791	4.1041	4.3768	5.2523	5.335	5.0879	5.3146	5.0128	5.6073	5.3477	5.384	5.543	5.2317	5.5001	5.1723	6.2545	6.0811	5.4173	6.2417	5.7159	5.9293	5.8443	5.5011	5.5107	5.5298
pos_37	metab_36	metab_36	-	-	401.216	5.048	pos	-	-	-	-	-	-	0.0065	4.8462	5.565	3.8903	4.8729	3.7595	3.6442	5.2271	5.1711	5.0427	4.1134	5.7374	3.6863	4.1413	5.7367	5.5766	5.6469	4.631	4.3032	5.3466	4.8013	4.8787	5.1254	4.2571	5.1049	4.2785	5.0786	5.4105	4.5151	5.0942	4.7002	4.8753	4.8639	5.2459	5.2462	5.3288
pos_38	metab_37	metab_37	-	-	179.142	3.7763	pos	-	-	-	-	-	-	0.004	4.7866	5.1806	4.652	4.4247	4.4386	4.204	4.879	5.0332	4.7063	4.6013	5.0689	4.3849	4.2989	5.1508	5.089	5.068	4.8628	4.6847	5.058	4.9632	4.758	4.9992	4.8247	4.9279	4.6886	5.1112	5.2196	4.7163	5.2153	4.8924	5.0174	5.0016	4.9803	4.9621	5.0098
pos_39	metab_38	metab_38	-	-	543.278	3.5494	pos	-	-	-	-	-	-	0.0042	3.0459	4.4995	3.5935	2.6009	3.8066	2.6137	4.5148	4.5121	3.6945	4.1758	4.4497	2.6557	3.4624	4.6648	4.7366	4.5501	4.3126	4.8374	4.8539	4.689	4.5166	5.1765	4.2248	4.766	2.7833	4.3382	3.1384	2.8611	4.6291	3.9998	4.2569	4.1702	4.496	4.4988	4.5159
pos_40	metab_39	metab_39	-	-	312.179	3.2001	pos	-	-	-	-	-	-	0.0041	4.0827	4.6256	3.0825	2.6196	3.527	2.6324	4.0686	4.3377	3.8853	4.0785	4.3679	3.6385	2.7015	4.878	4.767	4.7423	3.8201	4.8746	4.6155	4.211	4.7865	4.8113	3.9953	4.7841	4.3411	5.27	4.5424	4.2025	4.7695	4.6336	4.8173	4.6911	4.7106	4.7275	4.7053
pos_41	metab_40	metab_40	-	-	139.018	14.0144	pos	-	-	-	-	-	-	0.015	5.7355	5.5815	5.7346	5.7334	5.7866	5.914	5.8308	5.752	5.8542	5.7894	5.6771	5.9388	5.9342	5.6091	5.6186	5.6622	5.6235	5.4824	5.5634	5.6006	5.6669	5.4671	5.7739	5.5888	5.6316	5.4425	5.4736	5.6445	5.4586	5.6081	5.5734	5.5606	5.5333	5.6414	5.6979
pos_43	metab_42	metab_42	-	-	303.07	1.1532	pos	-	-	-	-	-	-	0.0008	6.5351	6.6816	6.3265	5.6948	6.3334	5.5444	6.546	6.5952	6.5895	6.513	6.6094	6.1089	6.0108	6.4217	6.5375	6.4736	6.6121	6.1828	6.898	6.2903	6.4583	5.5909	6.611	6.5262	6.4747	6.8217	6.8008	6.5602	6.8512	6.6801	6.7509	6.7768	6.6527	6.6495	6.6511
pos_44	metab_43	metab_43	-	-	152.022	0.5766	pos	-	-	-	-	-	-	0.0069	6.2666	6.054	6.295	6.2657	6.311	6.2219	6.4041	6.1453	6.1984	6.4063	6.2168	6.3485	6.2435	5.8413	6.0027	6.0257	6.2134	6.2819	6.0941	6.1571	6.2435	6.2444	6.4496	6.2342	5.8842	5.9678	5.9369	5.9153	5.9143	5.8935	5.8832	5.8357	6.1103	6.1113	6.1998
pos_45	metab_44	metab_44	-	-	762.665	0.5584	pos	-	-	-	-	-	-	0.0056	5.5472	5.1302	5.4845	4.5378	4.6572	4.5974	4.1301	5.2391	5.0803	5.3217	4.6313	4.888	5.5488	5.0928	5.1113	5.2554	4.9905	4.368	4.3666	4.7886	4.8367	4.7225	4.9701	4.1594	5.501	4.8135	5.1807	5.3303	5.2745	5.3787	5.2335	5.3061	5.1574	5.1519	5.1642
pos_46	3-Hydroxy-4-methoxyphenylacetic acid	metab_45	HMDB0000333	-	428.122	1.2998	pos	M+H-H2O, M+H, M+ACN+H, 2M+ACN+Na	C9H10O4	59.2	-	-2.6708	-	0.0035	4.3269	5.0528	4.2272	3.6685	4.4882	3.3732	4.3853	5.1525	4.9207	5.0628	5.3144	4.7523	4.8875	5.4378	5.3939	5.4405	4.9959	5.3624	5.4277	5.315	5.2061	5.6136	5.0697	5.2517	4.6639	5.5303	5.4322	4.9647	5.3867	5.1416	5.2282	5.2617	5.2975	5.3495	5.3136
pos_47	Pantothenic Acid	metab_46	HMDB0000210	C00864	220.117	1.2998	pos	M+H, M+Na, M+H-H2O, M+H-2H2O	C9H17NO5	90.5	-	-3.70413	79-83-4	0.0014	6.1585	6.3218	6.1219	5.5989	6.0894	5.34	5.9746	6.2381	6.1293	6.1768	6.2971	5.8717	5.879	6.2767	6.3316	6.2343	6.2781	6.3102	6.4168	6.3407	6.1476	6.4868	6.1909	6.3184	5.9219	6.034	6.1718	6.2032	6.2221	5.9978	6.0347	6.0323	6.2073	6.2167	6.2069
pos_48	metab_47	metab_47	-	-	385.117	1.2785	pos	-	-	-	-	-	-	0.0024	3.8901	4.4144	4.0188	2.7779	4.3815	1.6324	3.8009	4.4893	3.7774	4.2652	4.204	3.9733	3.9598	6.1988	5.7984	6.0229	4.4768	4.5064	4.523	4.7353	4.2978	6.5237	4.2516	4.4792	3.9508	4.7578	4.4678	3.9831	4.4334	4.1157	4.2896	4.2815	5.6123	5.6135	5.6361
pos_49	metab_48	metab_48	-	-	150.054	1.4411	pos	-	-	-	-	-	-	0.0012	4.3537	4.9724	4.5228	4.2938	4.2303	4.2232	4.4783	4.464	4.6142	4.6388	4.643	4.4855	4.5914	5.2054	5.0742	5.1488	4.5451	4.521	5.0258	4.811	4.6409	5.0716	4.6044	4.706	4.8054	5.1267	4.9969	4.7259	4.8484	4.9198	4.9347	4.9636	4.8958	4.8851	4.8822
pos_50	metab_49	metab_49	-	-	233.149	0.6304	pos	-	-	-	-	-	-	0.0046	5.1511	5.3153	5.3412	5.0212	5.373	4.9645	5.5714	5.3145	5.2975	5.2037	5.3241	5.3785	5.3591	5.4329	5.275	5.3202	5.4226	5.2531	5.4175	5.226	5.2233	5.4348	5.2511	5.2007	5.0721	5.3676	5.2562	5.1808	5.3455	5.2821	5.3183	5.3149	5.3023	5.3701	5.3468
pos_51	metab_50	metab_50	-	-	245.076	0.6492	pos	-	-	-	-	-	-	0.0022	5.5579	5.4923	5.5839	5.274	5.558	5.1943	5.6339	5.5061	5.7044	5.6705	5.4898	5.5629	5.5268	5.2033	5.2331	5.3088	5.5678	5.4388	5.3284	5.5042	5.5907	4.9793	5.6363	5.4056	5.734	5.4451	5.3417	5.6239	5.3712	5.6797	5.6029	5.6012	5.5171	5.5472	5.5176
pos_52	N-Acetyl-b-neuraminic acid	metab_51	-	-	274.091	0.6492	pos	M+H-2H2O, M+Na, M+H-H2O, M+H	C11H19NO9	67.4	-	-3.64665	-	0.0015	5.3762	5.2165	5.3296	5.2536	5.2024	4.985	5.2744	5.279	5.3738	5.3604	4.8029	5.3249	5.321	5.1813	5.0459	5.2467	5.341	5.0414	5.0763	5.0937	5.2032	4.6742	5.3632	4.9628	5.9574	5.4363	5.7768	5.4941	5.3563	5.6471	5.634	5.5751	5.3605	5.3706	5.353
pos_53	metab_52	metab_52	-	-	444.793	0.5584	pos	-	-	-	-	-	-	0.0024	5.2764	5.0483	5.3034	4.4703	5.0869	4.6161	4.9932	5.1645	5.0447	5.1206	5.2075	4.7357	5.3868	5.0274	4.9437	5.0627	5.1234	5.0897	5.0729	5.2312	5.1556	4.6386	5.0034	5.0625	5.4204	4.7225	4.9746	5.2544	5.2052	5.1753	5.0543	5.0693	5.0625	5.067	5.0811
pos_54	metab_53	metab_53	-	-	283.103	0.7248	pos	-	-	-	-	-	-	0.0026	4.686	4.8674	4.7771	4.5008	4.7751	4.3796	4.7843	4.8414	4.8086	4.8735	4.9683	4.7259	4.7507	5.0386	4.9604	4.9986	4.7384	4.9292	4.8991	4.9225	5.0452	4.8722	4.886	5.0042	4.821	5.0216	4.917	4.7199	5.0071	4.9138	4.9965	4.8773	4.9113	4.9295	4.8931
pos_55	metab_54	metab_54	-	-	201.123	0.7248	pos	-	-	-	-	-	-	0.0036	4.431	4.9636	4.4358	4.3666	4.3742	4.1579	4.3238	4.5667	4.3278	4.4846	4.3106	4.7203	4.382	4.5246	4.3753	4.4195	3.9915	4.2651	4.1993	4.0785	4.0018	4.3495	4.4285	3.9673	4.3874	4.6076	4.3662	4.3994	4.453	4.3984	4.4083	4.3663	4.3172	4.344	4.3384
pos_56	metab_55	metab_55	-	-	340.101	1.6951	pos	-	-	-	-	-	-	0.0031	4.6004	4.5171	4.7237	3.8023	4.5566	3.9692	4.8257	4.809	4.6162	4.9462	4.6657	4.2134	5.0056	5.7945	5.657	5.728	4.6084	5.1813	5.3445	4.8276	5.2434	5.2186	5.025	5.2911	4.6461	4.8347	4.9866	4.933	4.6809	4.6713	4.7276	4.7034	5.2557	5.2793	5.2958
pos_57	2-Formaminobenzoylacetate	metab_56	-	C05835	208.06	1.7764	pos	M+H, M+Na, 2M+K, M+ACN+H	C10H9NO4	52.5	-	-3.41604	-	0.0029	5.6248	5.6937	5.464	5.1277	5.5269	5.0176	5.5598	5.6106	5.5712	5.5621	5.5823	5.233	5.1419	5.4562	5.5832	5.5177	5.5633	5.5219	5.7988	5.8006	5.514	5.8088	5.6184	5.6422	5.5178	5.7719	5.7916	5.534	5.9408	5.7443	5.7952	5.8109	5.6429	5.6536	5.6569
pos_58	metab_57	metab_57	-	-	200.127	0.7248	pos	-	-	-	-	-	-	0.0035	4.5946	4.73	4.5975	4.5124	4.5936	4.4754	4.5937	4.5662	4.7396	4.7722	4.9077	4.9523	4.8892	5.3826	5.1174	5.2924	4.5485	4.6291	4.6564	4.7306	4.7224	5.1359	4.6467	4.6487	4.7898	4.9989	4.8495	4.592	4.6903	4.8277	4.8097	4.7364	4.7997	4.8421	4.8139
pos_59	metab_58	metab_58	-	-	275.159	0.7248	pos	-	-	-	-	-	-	0.0042	4.5432	4.8372	4.9254	4.1034	4.754	4.1909	4.9304	4.7973	4.665	4.6081	4.8493	4.6062	4.7804	5.0984	4.8985	5.006	4.8183	4.9067	5.0639	4.9482	4.9069	4.9543	4.6542	5.0169	4.5498	5.0463	4.8723	4.7794	5.1292	4.8722	4.9751	4.8722	4.8944	4.9238	4.8726
pos_60	metab_59	metab_59	-	-	290.159	0.7248	pos	-	-	-	-	-	-	0.0034	4.945	5.0452	5.0401	4.7671	4.9572	4.7716	4.9765	4.9312	4.9183	4.9832	4.9431	4.9521	4.951	5.0113	5.1094	4.8706	4.8214	4.9302	4.8356	5.0536	5.046	5.261	4.9401	5.0064	5.0728	4.7261	5.0936	4.9799	5.22	5.1718	5.1948	5.1269	5.0124	5.0182	5.0547
pos_61	Allysine	metab_60	HMDB0059595;HMDB0001263	C04076;C01475	128.07	0.7248	pos	M+H-H2O, M+Na, M+ACN+H, M+H-2H2O	C6H11NO3	-	56.3	-2.74326	1962-83-0	0.0016	5.3719	5.3358	5.3085	5.1593	5.3408	5.1189	5.313	5.3245	5.2589	5.273	5.3749	5.2409	5.2213	5.3598	5.3257	5.3415	5.3279	5.3033	5.4064	5.3565	5.3205	5.2392	5.3645	5.3383	5.3804	5.4772	5.4812	5.4765	5.591	5.4751	5.5281	5.5091	5.3851	5.3899	5.3836
pos_62	metab_61	metab_61	-	-	361.148	2.0367	pos	-	-	-	-	-	-	0.0046	3.8938	4.4772	3.8732	3.0954	3.3888	3.0998	4.3117	4.4489	4.7071	3.7056	5.0621	3.7095	3.756	4.7436	4.6608	4.6597	4.1219	4.3143	4.8579	4.3959	4.6148	4.2395	3.2512	4.6198	4.5687	5.0254	5.2317	4.4802	5.0024	4.7966	4.906	4.8639	4.6658	4.7005	4.6765
pos_63	metab_62	metab_62	-	-	114.055	0.7248	pos	-	-	-	-	-	-	0.0026	4.8281	4.8891	4.8636	4.603	4.8562	4.6009	4.9046	4.8947	4.8918	4.9173	5.001	4.7878	4.8408	5.1072	4.9014	5.0701	4.8342	4.8548	4.8937	4.918	4.928	4.8535	4.8595	4.8547	4.9396	5.1184	4.9994	4.9009	5.0489	5.0041	5.0348	5.013	4.9453	4.9787	4.9496
pos_64	metab_63	metab_63	-	-	180.087	0.7248	pos	-	-	-	-	-	-	0.0034	5.2272	5.2991	5.2431	5.0548	5.2445	5.1048	5.2595	5.2662	5.2801	5.2109	5.3011	5.1834	5.1215	5.2101	5.2724	5.2219	5.2026	5.263	5.147	5.2907	5.2975	5.8644	5.2508	5.2716	5.3616	5.2695	5.3673	5.3083	5.4941	5.3948	5.4453	5.3965	5.308	5.3339	5.3033
pos_65	metab_64	metab_64	-	-	184.06	0.7248	pos	-	-	-	-	-	-	0.003	5.8964	5.9458	5.861	5.5564	5.8657	5.5391	5.9191	5.9014	5.9468	5.8839	5.9501	5.7092	5.88	5.9795	5.8712	5.9543	5.8443	5.7621	5.9596	5.8814	5.8767	5.9126	5.8478	5.8811	5.889	6.0454	5.976	5.8959	6.0478	6.06	6.101	6.0743	5.9234	5.9664	5.9227
pos_66	2-Phenylethyl beta-D-glucopyranoside	metab_65	HMDB0029819	-	267.122	2.4011	pos	M+H-H2O, M+Na, M+H, M+H-2H2O	C14H20O6	-	52.5	-3.76547	18997-54-1	0.0045	4.9296	4.6779	4.8076	4.409	4.7793	4.4326	4.8901	5.0959	4.7277	5.1011	5.3075	4.5338	4.7449	4.9042	4.9146	5.0127	4.9752	5.0307	4.7547	5.0601	5.0255	4.574	4.8808	5.0468	4.734	5.0118	5.3497	5.2745	5.7396	5.1253	5.2376	5.2542	5.0469	4.9909	5.022
pos_67	metab_66	metab_66	-	-	241.999	0.4983	pos	-	-	-	-	-	-	0.0118	4.5202	5.5989	4.3443	5.974	4.2636	5.6133	4.2274	4.0458	4.8993	4.2605	3.9955	5.4622	5.1043	4.7032	4.5493	4.4858	4.2721	4.167	4.1883	4.1106	4.0234	4.8445	4.3285	4.089	5.6958	5.3683	5.575	4.7042	4.213	5.6067	5.6429	5.5311	4.2423	4.1142	4.2007
pos_68	metab_67	metab_67	-	-	111.968	0.04	pos	-	-	-	-	-	-	0.0045	4.709	4.5308	4.6977	4.8728	4.7666	4.8845	4.7365	4.5893	4.7181	4.6829	4.5639	4.7979	4.8306	4.5145	4.4816	4.5648	4.6667	4.5568	4.5153	4.6076	4.5381	4.3848	4.6659	4.5052	4.7188	4.4957	4.5105	4.699	4.5754	4.6737	4.606	4.6396	4.643	4.6116	4.606
pos_69	metab_68	metab_68	-	-	186.036	0.4769	pos	-	-	-	-	-	-	0.0226	3.8477	3.8108	3.6994	4.1832	3.5642	4.1934	3.5656	3.2252	3.9756	3.5601	3.0853	4.1142	4.1209	3.758	3.674	3.7031	3.4955	3.4393	3.5	3.4381	3.3241	3.6753	3.7489	3.4671	4.0541	3.8057	3.8254	3.867	3.4549	3.9921	3.8644	3.9487	3.4561	3.4406	3.545
pos_70	metab_69	metab_69	-	-	341.149	0.4769	pos	-	-	-	-	-	-	0.0035	4.2801	4.6011	4.4867	3.5768	4.3931	3.4218	4.5134	4.7321	4.3128	4.6931	4.8951	4.0516	3.5666	4.219	4.6822	4.4057	4.8392	5.0216	4.9023	5.0454	5.1588	4.3817	4.7023	5.0612	4.3026	3.937	4.4363	4.38	4.7195	4.1902	4.3887	4.3362	4.6009	4.6258	4.6311
pos_72	metab_71	metab_71	-	-	123.04	0.4983	pos	-	-	-	-	-	-	0.0051	4.9859	5.5723	4.8773	5.8512	4.6813	5.597	4.7023	4.4947	5.2147	4.8105	4.4008	5.527	5.3433	5.018	4.9107	4.9287	4.749	4.6053	4.6617	4.614	4.5335	5.07	4.8557	4.622	5.6524	5.3756	5.5275	5.0905	4.6328	5.5838	5.5956	5.5191	4.6146	4.6111	4.6342
pos_73	metab_72	metab_72	-	-	226.951	0.5391	pos	-	-	-	-	-	-	0.0043	3.5752	3.9475	2.2262	4.6223	5.5286	4.3969	5.7493	4.4096	4.4933	4.5056	5.2443	4.8245	2.1773	2.4496	3.4495	2.4389	4.7685	5.7844	4.8731	5.1357	4.751	2.9753	4.9472	5.2902	2.2774	3.715	2.572	4.5197	2.5058	2.4191	2.4549	2.4429	4.2937	4.2543	4.2507
pos_74	metab_73	metab_73	-	-	930.587	0.5584	pos	-	-	-	-	-	-	0.0071	5.4065	4.6115	5.4257	4.0824	3.1907	3.9732	3.2664	4.7327	4.7379	4.9457	3.876	4.1478	5.5325	5.0588	4.7262	5.1052	4.302	3.727	3.6406	4.2333	4.152	4.3497	4.3704	3.4155	5.5067	4.4135	4.9043	4.8096	5.2403	5.1774	5.0988	5.0232	4.6664	4.7106	4.6987
pos_75	metab_74	metab_74	-	-	816.678	0.5584	pos	-	-	-	-	-	-	0.0043	4.8849	4.477	4.7589	4.7187	4.9815	4.8087	4.447	4.7654	5.1246	5.0771	4.5097	5.0208	4.607	2.7626	4.3702	4.3518	4.9676	3.8849	4.2085	4.4588	4.6526	4.0498	5.0427	3.9401	3.5846	4.4402	4.2604	4.9774	2.8189	4.5534	4.008	4.1589	4.6575	4.6618	4.6116
pos_76	metab_75	metab_75	-	-	201.933	0.5949	pos	-	-	-	-	-	-	0.0042	5.4864	5.5281	5.6788	5.0888	5.4324	5.1821	5.3494	5.5325	5.4183	5.47	5.4327	5.6178	5.7865	5.3094	5.2874	5.3485	5.4425	5.3723	5.3479	5.5527	5.2719	5.3751	5.4533	5.2771	5.5918	5.3909	5.4055	5.4997	5.0621	5.3294	5.3851	5.2714	5.4213	5.4436	5.4735
pos_77	metab_76	metab_76	-	-	174.895	0.6126	pos	-	-	-	-	-	-	0.0064	4.6917	3.4037	5.0322	3.9157	5.2083	3.829	4.7888	4.9325	5.2489	5.3086	5.132	4.6911	5.032	5.6088	5.4204	5.5009	4.8073	3.8886	5.0396	5.0315	5.0218	5.3739	4.8983	5.1018	4.6805	5.0773	4.0681	4.8391	5.4845	5.1199	5.3325	5.1843	5.1974	5.2031	5.2685
pos_78	metab_77	metab_77	-	-	116.107	0.6492	pos	-	-	-	-	-	-	0.0028	5.2814	5.3608	5.3537	5.0768	5.4721	4.956	5.3274	5.3597	5.2578	5.4784	5.4123	5.2481	5.2951	5.4388	5.4585	5.4603	5.338	5.5209	5.3745	5.4876	5.4593	5.3881	5.3035	5.4803	5.2042	5.3129	5.3194	5.069	5.336	5.2538	5.2785	5.2609	5.3197	5.3576	5.3457
pos_79	metab_78	metab_78	-	-	181.052	0.6492	pos	-	-	-	-	-	-	0.0015	5.483	5.4716	5.538	5.4664	5.4167	5.3163	5.5383	5.5357	5.4883	5.5832	5.4493	5.4933	5.4997	5.5025	5.4991	5.5107	5.5638	5.4827	5.4487	5.5841	5.5989	5.015	5.5646	5.4906	5.4563	5.4778	5.4573	5.3221	5.3844	5.4757	5.4712	5.4609	5.4952	5.5178	5.5047
pos_80	metab_79	metab_79	-	-	229.117	0.5949	pos	-	-	-	-	-	-	0.0033	5.4489	5.7158	5.5618	5.6455	5.4502	5.5699	5.4869	5.6073	5.8341	5.7361	5.5414	5.7929	5.4919	5.6294	5.6398	5.6579	5.6102	5.7088	5.7111	5.637	5.7384	5.7461	5.7632	5.7131	5.7161	5.4377	5.4702	5.3161	5.1021	5.3546	5.3567	5.3141	5.618	5.6182	5.6383
pos_81	metab_80	metab_80	-	-	199.143	0.7248	pos	-	-	-	-	-	-	0.0069	4.1023	4.2658	3.9439	3.6339	3.996	3.4495	4.2195	3.8181	4.275	4.5354	4.8156	4.7864	4.6921	5.3009	5.108	5.1652	3.8733	4.0224	4.0913	3.9356	4.1	4.2645	3.7326	4.0337	3.8199	4.0854	4.174	3.8462	4.4227	4.0669	4.0735	4.0242	4.6369	4.618	4.6753
pos_82	metab_81	metab_81	-	-	307.164	1.5554	pos	-	-	-	-	-	-	0.0028	5.3038	5.5129	5.236	4.8711	5.0293	4.6021	5.3219	5.4895	5.396	5.4979	5.6375	4.9904	4.9574	5.4864	5.5872	5.5328	5.448	5.3359	5.6392	5.5044	5.5493	5.502	5.5098	5.5521	5.3302	5.6409	5.6212	5.3692	5.59	5.53	5.5832	5.5373	5.5195	5.5536	5.5265
pos_83	metab_82	metab_82	-	-	326.086	0.7248	pos	-	-	-	-	-	-	0.0052	4.6614	4.7041	4.9004	4.1537	4.4	4.4049	4.8197	4.7148	4.8661	4.74	4.2624	4.4061	4.5919	4.5191	4.5587	4.6066	4.6166	4.4904	4.5665	4.6991	4.6023	4.9935	4.8951	4.4658	4.8327	4.682	4.7936	4.6984	4.5913	4.84	4.8532	4.7908	4.6473	4.5894	4.592
pos_84	Trimethylamine N-oxide	metab_83	HMDB0000925	C01104	76.0761	0.5949	pos	M+H, 2M+H, M+K	C3H9NO	97.4	-	5.11541	1184-78-7	0.0036	5.4136	5.6028	5.0483	5.0991	5.3442	5.0342	5.3765	5.3311	5.16	5.4581	5.7753	5.6872	5.7759	6.1617	5.9821	6.1172	5.3059	5.5509	5.6117	5.2358	5.9898	4.903	5.3249	5.8742	6.0886	6.3099	6.2207	6.0892	6.1777	6.1239	6.1459	6.1569	5.9639	5.9906	5.9752
pos_85	metab_84	metab_84	-	-	199.096	1.6153	pos	-	-	-	-	-	-	0.0083	3.9512	4.2615	3.8688	3.5039	3.8475	3.5136	4.0104	4.1773	3.8917	4.0085	4.398	3.8613	3.833	4.4149	4.4447	4.3718	4.1047	4.252	4.4914	4.3025	4.1967	4.568	3.9665	4.3219	4.1892	4.7415	4.6667	4.3587	4.8287	4.5366	4.6575	4.5727	4.4266	4.4566	4.4258
pos_86	metab_85	metab_85	-	-	179.033	1.6353	pos	-	-	-	-	-	-	0.0086	3.682	3.3053	3.4916	2.6187	3.4777	2.9648	3.6479	3.5688	3.2962	3.3468	3.7514	3.2776	2.7801	2.695	3.0501	3.0309	3.4347	3.4331	3.0936	3.3618	3.4465	2.5426	3.3667	3.4413	3.9704	4.4017	4.314	4.1999	4.5602	4.2354	4.3297	4.279	3.9048	3.8292	3.8852
pos_87	metab_86	metab_86	-	-	128.107	1.6153	pos	-	-	-	-	-	-	0.0016	4.3886	4.4288	4.3602	4.2184	4.65	4.2659	4.3909	4.4177	4.3529	4.5468	4.5804	4.3758	4.4094	4.7419	4.7266	4.7321	4.3904	4.6577	4.4427	4.7227	4.5883	4.7221	4.3323	4.6304	4.4102	4.4465	4.4844	4.3799	4.7456	4.5044	4.5183	4.5027	4.5708	4.5687	4.5711
pos_88	metab_87	metab_87	-	-	287.159	1.6353	pos	-	-	-	-	-	-	0.0047	4.4068	4.8865	4.5237	3.6266	4.2958	3.2593	4.6782	4.8604	4.5502	4.6239	4.9514	4.1842	4.2763	4.9509	5.0063	4.8785	4.8252	5.0472	4.908	4.9885	5.052	5.0573	4.5921	5.0593	4.7487	5.2332	5.1639	4.9579	5.3356	5.0925	5.1929	5.1784	5.0216	4.967	4.9631
pos_89	metab_88	metab_88	-	-	226.143	1.6951	pos	-	-	-	-	-	-	0.0051	3.8711	4.1812	3.9434	3.0892	3.6863	2.9661	3.8459	4.1416	3.762	4.0524	4.2247	3.5167	3.6928	4.1634	4.2566	4.0959	4.0773	4.2658	4.1714	4.4204	4.5565	4.3407	4.026	4.5947	4.1108	4.4041	4.2728	4.2653	4.4845	4.1781	4.2935	4.2911	4.2753	4.2961	4.2735
pos_90	metab_89	metab_89	-	-	297.107	1.6951	pos	-	-	-	-	-	-	0.0093	3.8896	3.8639	3.9977	2.7568	3.5769	3.0263	3.9255	4.0761	4.019	3.921	4.0498	3.3069	3.7945	4.1699	4.1322	4.1621	4.0981	4.2747	4.3646	4.2735	4.0755	4.2139	3.9537	4.2444	3.8633	4.66	4.4904	4.4266	4.4791	4.3663	4.3889	4.3975	4.1667	4.1975	4.2691
pos_91	metab_90	metab_90	-	-	260.148	1.7764	pos	-	-	-	-	-	-	0.0023	5.3395	5.4469	5.2739	4.8064	5.1757	4.5049	5.3647	5.4058	5.4626	5.4508	5.674	5.0112	5.2361	5.6188	5.5978	5.6484	5.5086	5.5513	5.5342	5.5999	5.5143	5.5842	5.3333	5.5437	5.2675	5.7257	5.6791	5.4226	5.8399	5.6187	5.6608	5.6788	5.5807	5.564	5.5524
pos_92	metab_91	metab_91	-	-	239.069	1.7141	pos	-	-	-	-	-	-	0.0051	4.9059	4.5407	4.885	4.1323	4.6985	4.5559	4.8292	4.7523	4.7318	4.886	4.7135	4.5674	4.8227	4.6816	4.6183	4.8153	4.8879	4.7152	4.799	4.9595	4.4218	4.8886	4.9329	4.6205	4.8024	4.3458	4.5341	4.7206	4.5725	4.6485	4.5496	4.5828	4.7249	4.7847	4.7846
pos_93	metab_92	metab_92	-	-	201.111	1.8173	pos	-	-	-	-	-	-	0.0047	3.8579	3.8488	3.4703	3.6152	3.6162	3.6111	3.5489	3.6627	3.8096	3.7958	3.9637	3.6303	3.7808	4.0802	3.9295	3.9659	3.7487	3.6409	3.8731	3.7515	3.7774	4.1763	3.5831	3.8251	3.889	4.4413	4.299	4.0197	4.4969	4.2002	4.3126	4.2951	4.0269	3.9951	3.9947
pos_94	metab_93	metab_93	-	-	155.106	1.8173	pos	-	-	-	-	-	-	0.0027	4.2678	4.6146	4.1216	3.9025	4.1245	3.8687	4.2601	4.4286	4.2116	4.3065	4.4763	4.0696	4.0632	4.4369	4.5022	4.4306	4.3561	4.1071	4.7081	4.4085	4.3363	4.5065	4.3107	4.45	4.4731	4.7907	4.868	4.5521	4.9194	4.6223	4.7247	4.6914	4.5452	4.5181	4.5499
pos_95	metab_94	metab_94	-	-	251.127	1.8379	pos	-	-	-	-	-	-	0.0073	3.8496	4.4358	3.7205	3.5717	3.8654	3.4096	4.1504	4.1214	3.9091	3.8329	4.3016	3.5415	3.5214	4.1369	4.1351	4.1184	3.8822	4.1467	4.0459	4.0708	4.1544	4.2851	3.6102	4.1752	4.2467	4.7942	4.6514	4.5225	5.0168	4.6819	4.7551	4.6872	4.3675	4.3973	4.3553
pos_96	Salicyluric beta-D-glucuronide	metab_95	HMDB0240252	-	354.081	1.859	pos	M+H, M+Na, M+H-H2O	C15H17NO10	-	82.5	-3.76564	-	0.005	4.4234	5.0071	4.7265	3.9127	3.9926	3.6309	4.8055	5.0032	4.3725	4.2935	5.0738	4.1552	4.3436	5.0919	4.9666	5.0154	4.9252	5.3529	5.4004	4.9187	5.3208	4.0035	4.717	5.3788	4.6969	5.2017	5.1299	4.593	4.7333	4.7538	4.8809	4.7907	4.9666	4.9623	5.0258
pos_97	metab_96	metab_96	-	-	397.069	1.8973	pos	-	-	-	-	-	-	0.0024	5.993	5.826	5.9934	5.7188	5.8231	5.5242	5.891	5.9171	5.9867	6.0038	5.9897	5.8968	6.0384	5.8637	5.8101	5.925	5.9445	5.8317	5.8887	5.9107	5.874	5.769	5.9768	5.8166	5.9366	5.717	5.7218	5.9678	5.6718	5.9026	5.846	5.8061	5.9067	5.9285	5.9411
pos_98	metab_97	metab_97	-	-	252.086	1.9161	pos	-	-	-	-	-	-	0.0005	5.2036	5.6319	4.9954	4.5722	4.7083	4.5835	5.2009	5.4916	5.4468	5.3828	5.6224	4.87	4.9791	5.612	5.6015	5.5287	5.3358	5.0761	5.6885	5.3275	5.3702	5.7522	5.4764	5.4832	5.4234	5.9	5.9538	5.5644	5.982	5.7407	5.799	5.7667	5.6341	5.6347	5.6399
pos_99	metab_98	metab_98	-	-	245.093	1.9563	pos	-	-	-	-	-	-	0.0025	5.0575	5.4404	5.0557	4.3399	4.9623	4.1701	5.0066	5.3773	5.2617	5.2566	5.4623	4.8486	4.9246	5.5614	5.5317	5.5222	5.3157	5.3242	5.6725	5.4895	5.3432	5.6459	5.3314	5.4755	5.1276	5.6565	5.6366	5.3602	5.6451	5.4384	5.5157	5.4943	5.4647	5.4728	5.5018
pos_100	metab_99	metab_99	-	-	177.054	1.9161	pos	-	-	-	-	-	-	0.001	5.758	6.1779	5.5905	5.1811	5.3009	5.1929	5.7539	6.0435	5.9761	5.9174	6.1681	5.4395	5.5256	6.175	6.1719	6.1004	5.8711	5.6588	6.2225	5.894	5.9333	6.3159	6.011	6.0249	5.9729	6.4673	6.4991	6.0951	6.5249	6.2911	6.3574	6.3172	6.1878	6.1885	6.1915
pos_101	Epidermin	metab_100	HMDB0034777	-	262.127	1.9972	pos	M+H, M+ACN+Na, M+H-H2O	C11H19NO6	-	54.3	-3.79135	126050-09-7	0.0021	5.2378	5.3474	5.1813	4.862	5.1996	4.4156	5.2539	5.2891	5.4751	5.4799	5.6429	5.1686	5.1314	5.2932	5.4767	5.3223	5.467	5.4388	5.5109	5.758	5.91	5.63	5.3169	5.784	4.9335	5.5719	5.4282	5.2066	5.3761	5.3091	5.3665	5.3802	5.4798	5.4597	5.4744
pos_102	metab_101	metab_101	-	-	283.128	2.0171	pos	-	-	-	-	-	-	0.0023	4.5144	4.8114	4.6394	4.2193	4.4584	4.1707	4.3973	4.8228	4.5503	4.8205	5.0663	4.6033	4.6727	5.355	5.2462	5.2709	4.615	5.1001	4.9967	4.9021	4.8366	5.0753	4.564	4.9321	4.3036	4.7452	4.745	4.3663	4.5582	4.4224	4.5176	4.507	4.9612	4.99	4.9691
pos_103	metab_102	metab_102	-	-	357.131	1.7141	pos	-	-	-	-	-	-	0.0038	4.7406	4.5861	4.8618	2.8716	4.2185	3.7291	4.7467	4.9315	4.3626	4.9017	4.7749	3.9469	4.6699	5.335	5.2095	5.289	4.8698	5.161	5.2741	5.2637	4.6985	5.3975	4.9947	5.0084	4.7596	4.667	4.6957	4.7171	4.6325	4.5814	4.5261	4.5287	5.0413	5.036	5.0703
pos_104	metab_103	metab_103	-	-	230.138	2.0783	pos	-	-	-	-	-	-	0.005	4.3628	4.4502	4.2616	4.3351	4.4077	4.2618	4.3923	4.4607	4.3806	4.423	4.5902	4.2975	4.3372	4.6701	4.6371	4.6535	4.4377	4.5463	4.5904	4.527	4.3982	4.4943	4.4306	4.5417	4.3883	4.7136	4.6887	4.4599	4.8246	4.6118	4.6907	4.661	4.548	4.5761	4.5124
pos_105	metab_104	metab_104	-	-	425.101	2.118	pos	-	-	-	-	-	-	0.004	5.9948	5.8645	6.0067	5.4797	5.8626	5.4839	6.0088	6.0397	5.9958	5.9457	5.8927	5.8278	5.8362	5.919	5.9118	5.9923	5.9694	6.1031	5.9867	6.0687	5.882	5.8601	5.957	5.9487	5.7171	5.6894	5.7822	5.893	5.7227	5.7852	5.7799	5.7642	5.9479	5.9172	5.9842
pos_106	metab_105	metab_105	-	-	251.102	2.1572	pos	-	-	-	-	-	-	0.0024	4.9088	5.5002	5.0625	3.9716	5.1288	4.149	4.9795	5.4635	4.8666	5.1879	5.7313	4.9975	4.8973	6.3705	6.1872	6.2394	5.4533	5.5532	5.9012	5.6656	5.5814	5.8889	5.1	5.7654	5.0654	5.7844	5.8001	5.2213	5.848	5.4585	5.5859	5.5668	5.8473	5.8237	5.8379
pos_107	metab_106	metab_106	-	-	243.122	2.1777	pos	-	-	-	-	-	-	0.0017	4.316	4.9416	4.0775	4.344	4.3225	4.2542	4.1787	4.9021	4.0915	4.3514	4.5312	4.1314	4.0544	4.9146	4.8396	4.7834	4.2231	4.7658	4.5854	4.434	5.0189	4.8135	4.3691	4.9155	4.6987	5.5503	5.0388	5.1007	5.4746	5.2218	5.3282	5.2956	5.0108	4.9922	4.9886
pos_108	Indole-3-carboxylic acid	metab_107	HMDB0003320	C19837	162.054	2.1975	pos	M+H, 2M+H, M+Na	C9H7NO2	74.6	-	-3.7689	771-50-6	0.0022	5.0065	5.0867	5.0205	4.835	4.8525	4.7309	4.9245	5.0971	4.901	4.9209	5.0954	4.8026	4.8365	5.0881	5.0834	5.0799	6.086	5.6566	5.13	5.0714	5.1793	7.6948	5.2215	5.3247	4.6987	5.0819	5.0638	4.856	4.9748	4.8374	4.9013	4.8866	6.5752	6.5351	6.5571
pos_109	metab_108	metab_108	-	-	252.122	2.259	pos	-	-	-	-	-	-	0.0046	3.7216	4.0562	3.8875	2.6211	3.4163	2.634	3.9361	4.1388	3.5433	3.5411	4.2047	2.6759	3.3693	4.3874	4.2904	4.2415	3.786	4.2003	4.3772	4.0705	4.0832	4.1619	3.7906	4.2433	3.8733	4.4369	4.3821	4.2544	4.4231	4.1841	4.3351	4.3041	4.2125	4.1996	4.246
pos_110	metab_109	metab_109	-	-	137.096	2.259	pos	-	-	-	-	-	-	0.0013	4.2954	4.6567	4.237	4.1076	4.1975	4.0171	4.3597	4.5039	4.2659	4.3564	4.5419	4.2177	4.2147	4.7206	4.6738	4.6319	4.4387	4.4069	4.6276	4.5032	4.5832	4.9378	4.3645	4.623	4.4253	4.9391	4.8532	4.5606	4.9773	4.7221	4.792	4.7639	4.6759	4.6684	4.665
pos_111	metab_110	metab_110	-	-	243.112	2.2995	pos	-	-	-	-	-	-	0.0056	3.5102	4.227	3.8694	3.3317	3.7388	2.4749	3.9598	4.0397	3.8465	4.0122	4.3077	3.8508	3.697	4.5764	4.4816	4.483	4.0801	4.3287	4.4239	4.3208	4.541	4.4488	3.9352	4.4802	3.9272	4.4395	4.413	3.746	4.2817	4.1233	4.2412	4.2096	4.2654	4.2912	4.332
pos_112	metab_111	metab_111	-	-	485.086	2.4219	pos	-	-	-	-	-	-	0.0076	4.5976	4.5733	4.6027	3.8114	4.2894	4.0352	4.5206	4.6428	4.7652	4.6112	4.6431	4.416	4.3145	4.3768	4.47	4.5684	4.6144	4.5123	4.5575	4.7508	4.6943	3.8927	4.6639	4.6659	4.109	4.6348	4.6064	4.5724	4.4678	4.5257	4.5266	4.5253	4.6583	4.5754	4.5712
pos_113	metab_112	metab_112	-	-	421.146	2.4219	pos	-	-	-	-	-	-	0.0055	3.0297	3.7978	3.4926	2.6077	2.6831	2.6205	3.3865	3.6636	3.7036	3.7662	4.0328	2.6624	2.6896	3.8526	4.1177	4.101	3.6085	3.4823	3.7869	4.0476	4.0728	3.5885	3.5832	3.9814	2.8928	4.5576	4.573	4.2567	4.4908	4.3143	4.3291	4.3155	4.1651	4.107	4.1529
pos_114	metab_113	metab_113	-	-	431.096	2.4433	pos	-	-	-	-	-	-	0.0018	6.5906	6.7671	6.4259	5.7175	6.4098	5.8825	6.4333	6.8474	6.5761	6.2378	6.7739	6.0836	6.1362	6.8499	6.8098	6.8019	6.5919	6.9061	7.0304	6.7574	6.9326	4.3564	6.4178	6.9605	6.4722	7.0922	6.9897	6.6773	6.8784	6.765	6.8793	6.7968	6.8566	6.8643	6.8349
pos_115	metab_114	metab_114	-	-	179.07	2.4219	pos	-	-	-	-	-	-	0.0033	3.3758	3.7074	3.3272	2.5124	3.0099	2.5252	3.3357	3.5797	3.5036	3.3737	3.8138	3.0513	3.1557	3.6913	3.7948	3.6138	3.6032	3.8046	3.7639	3.6405	3.5734	3.0398	3.4685	3.6031	3.4271	4.1606	4.0765	3.6863	4.0765	3.7771	3.9318	3.9062	3.7828	3.7936	3.8126
pos_116	metab_115	metab_115	-	-	369.111	2.4219	pos	-	-	-	-	-	-	0.0054	4.6772	4.3844	4.6572	4.2676	4.5129	4.4341	4.5982	4.6211	4.6656	4.6432	4.5735	4.5614	4.5501	4.4753	4.4622	4.53	4.633	4.5816	4.5343	4.6577	4.5644	3.4023	4.6382	4.5243	4.3288	4.3838	4.4669	4.6497	4.3166	4.5195	4.4374	4.4464	4.5874	4.5301	4.5666
pos_117	metab_116	metab_116	-	-	260.102	2.4219	pos	-	-	-	-	-	-	0.0042	3.3611	3.8589	4.0069	2.1311	3.5607	2.9149	3.8395	4.5104	3.2933	3.9519	4.1447	3.1737	3.3706	3.4695	3.8522	3.713	4.0798	4.7459	3.7016	4.9706	4.6367	2.4241	3.9218	4.7909	3.2123	4.1524	3.9191	4.241	4.371	3.4128	3.8838	3.5965	4.2891	4.304	4.2547
pos_118	metab_117	metab_117	-	-	208.096	2.5234	pos	-	-	-	-	-	-	0.0023	4.9671	5.2793	4.8938	4.1401	4.7597	4.2299	4.904	5.2141	4.9474	4.9123	5.1688	4.6604	4.6375	5.3498	5.2864	5.2682	5.1275	5.192	5.4629	5.1761	5.2643	5.5602	4.9447	5.3623	4.7539	5.3529	5.3195	5.1081	5.3013	5.0867	5.1606	5.1512	5.2595	5.2356	5.23
pos_119	metab_118	metab_118	-	-	141.018	2.4219	pos	-	-	-	-	-	-	0.0056	4.238	4.2093	4.3014	2.3548	3.7633	3.2089	4.2428	4.3845	4.3828	4.2571	4.4495	3.7841	3.8352	4.2485	4.3578	4.3369	4.3385	4.7253	4.4124	4.5927	4.4113	2.5122	4.247	4.5116	3.6153	4.1912	4.2394	4.2194	4.0533	3.9722	3.937	4.0441	4.3439	4.287	4.3492
pos_120	metab_119	metab_119	-	-	330.154	2.4219	pos	-	-	-	-	-	-	0.0062	5.2169	5.1656	5.1797	4.2998	4.8363	4.5361	5.0965	5.2552	5.2512	5.106	5.2681	4.8807	4.9088	5.1896	5.2468	5.2043	5.2422	5.4601	5.3831	5.4029	5.2184	4.7731	5.1326	5.3638	4.5544	5.3399	5.2339	5.1009	4.7729	5.0532	5.0932	5.0699	5.2025	5.2643	5.1973
pos_121	metab_120	metab_120	-	-	265.117	2.6481	pos	-	-	-	-	-	-	0.0079	4.9224	4.7691	4.8929	4.9458	5.0523	5.0292	4.9329	4.976	4.8112	4.8726	5.2845	4.9402	4.9428	4.7971	4.7567	4.9521	4.9124	4.9737	4.8607	4.8637	4.7936	4.597	4.8771	4.8514	4.9246	4.7473	4.7801	4.8871	5.1326	4.8818	4.8669	4.8651	5.0205	4.9517	4.9551
pos_122	metab_121	metab_121	-	-	267.133	2.6481	pos	-	-	-	-	-	-	0.004	5.5911	5.9006	5.3801	4.7338	5.3026	4.7988	5.5884	5.8477	5.5626	5.4795	5.79	5.118	5.162	5.8977	5.845	5.79	5.6943	5.5176	5.9945	5.6281	5.7483	5.8548	5.6301	5.8201	5.5272	6.0874	6.0633	5.6506	6.1415	5.8548	5.956	5.9392	5.8808	5.8543	5.8464
pos_123	metab_122	metab_122	-	-	466.227	2.6061	pos	-	-	-	-	-	-	0.006	3.9503	4.3115	3.7587	3.8601	3.8457	3.9354	4.0957	4.2662	4.539	4.158	4.7576	3.8673	3.8746	4.3777	4.3915	4.2922	4.0477	3.5743	4.5215	3.6927	4.2534	4.1331	3.877	4.3296	4.4748	5.0665	5.0527	4.552	5.0935	4.7954	4.8957	4.8288	4.5938	4.5845	4.577
pos_124	metab_123	metab_123	-	-	460.159	2.4219	pos	-	-	-	-	-	-	0.002	4.9943	5.3037	4.73	4.1471	4.5534	4.0623	4.986	5.2408	5.0425	4.7191	5.2995	4.2198	4.3123	5.3182	5.3142	5.2556	4.9821	5.0355	5.552	5.1471	5.3751	4.468	4.9168	5.4771	4.5718	5.5815	5.5018	5.1284	5.4021	5.1854	5.2662	5.2461	5.2548	5.2573	5.2736
pos_125	metab_124	metab_124	-	-	403.156	2.832	pos	-	-	-	-	-	-	0.0059	3.567	4.3845	2.7212	2.5902	3.4897	2.603	3.9328	4.1769	4.044	3.2962	4.6906	2.645	2.6721	4.2182	4.1577	4.1327	3.6056	3.6463	4.3652	3.8012	4.1064	3.8299	2.7542	4.207	4.1444	4.6549	4.8486	4.0185	4.8468	4.3379	4.5467	4.4971	4.2904	4.2457	4.3118
pos_126	metab_125	metab_125	-	-	330.19	2.9137	pos	-	-	-	-	-	-	0.0046	4.5947	5.2425	3.5421	3.4541	3.7543	3.0721	4.1603	4.9013	4.3106	3.872	4.6501	3.905	2.7213	4.995	4.9174	4.8768	4.0458	4.7769	4.9427	4.4136	4.9138	4.8599	3.9005	4.9074	4.8241	5.4516	5.114	5.3441	5.2336	5.1385	5.1897	5.1903	5.0255	4.9826	4.9861
pos_127	metab_126	metab_126	-	-	389.216	2.9343	pos	-	-	-	-	-	-	0.0035	3.9689	4.8298	4.3699	3.5169	4.2635	2.8312	4.4364	4.7309	3.8814	4.315	4.9142	3.9932	4.4192	5.4219	5.2452	5.2767	4.1566	4.6689	5.0035	4.9425	5.0265	5.2084	4.3396	5.0638	4.9412	5.5376	5.329	5.0648	5.4003	5.2441	5.3484	5.3485	5.2133	5.1956	5.237
pos_128	metab_127	metab_127	-	-	239.163	2.9738	pos	-	-	-	-	-	-	0.0028	5.1221	5.3294	4.8724	4.3716	4.8855	4.4884	5.1883	5.3435	5.2033	4.9161	5.5255	4.7678	4.7335	5.2439	5.2524	5.1557	5.1347	5.0126	5.4262	5.0724	5.3278	5.1986	4.8113	5.3539	5.1773	5.704	5.671	5.328	5.7674	5.4353	5.5467	5.5195	5.3554	5.3289	5.3286
pos_129	metab_128	metab_128	-	-	387.2	3.055	pos	-	-	-	-	-	-	0.0029	3.6925	4.6535	3.9726	3.0671	3.8196	3.0799	4.1516	4.5078	3.7061	4.0124	4.6616	3.1219	3.8698	4.9262	4.7526	4.7919	3.7675	4.1726	4.5212	4.6027	4.6171	4.8647	4.0966	4.6614	4.4633	5.2153	5.131	4.8504	5.1076	4.9229	5.0065	5.0163	4.801	4.7722	4.8061
pos_130	metab_129	metab_129	-	-	255.158	3.0965	pos	-	-	-	-	-	-	0.005	4.4482	4.7417	3.9816	3.1281	4.1182	3.5517	4.3469	4.576	4.4917	4.4501	4.9339	4.0458	4.1117	4.8499	4.8557	4.791	4.3741	4.3423	4.7201	4.4101	4.665	4.8341	4.35	4.6718	4.4877	5.3496	5.3148	4.8024	5.3082	5.0181	5.1063	5.1123	4.9127	4.8977	4.8687
pos_131	metab_130	metab_130	-	-	313.106	3.1164	pos	-	-	-	-	-	-	0.0048	4.4103	4.4161	4.3657	2.8944	3.3052	2.9072	3.2932	4.4416	4.1917	4.595	4.4255	3.8173	4.0173	5.0044	4.9503	4.9006	4.1754	4.6927	5.0093	4.2551	4.4371	5.1569	4.3527	4.6895	3.077	3.8357	4.3717	3.2293	3.5815	3.5037	3.4295	3.4574	4.611	4.5941	4.6356
pos_132	metab_131	metab_131	-	-	296.185	3.1575	pos	-	-	-	-	-	-	0.0028	5.0424	5.4679	4.5894	3.7989	4.3409	3.803	4.8892	5.1177	4.8674	4.6384	5.0912	4.4376	4.2659	5.1251	5.0994	5.0353	4.997	4.5458	5.3488	4.9293	4.9664	4.9018	4.797	5.1522	4.8564	5.4259	5.3509	5.0915	5.3413	5.1205	5.1847	5.1711	5.1173	5.0983	5.1153
pos_133	metab_132	metab_132	-	-	475.159	3.1164	pos	-	-	-	-	-	-	0.0055	4.7405	5.2149	4.9561	4.0031	4.5397	3.9305	4.688	5.1588	5.078	5.1775	5.3546	4.6611	4.714	5.4379	5.4873	5.3451	5.0316	5.385	5.2631	5.3798	5.2506	4.206	4.9311	5.3314	4.9057	5.6219	5.2964	5.2384	5.2623	5.1272	5.2225	5.1517	5.2509	5.2594	5.3012
pos_134	metab_133	metab_133	-	-	269.116	3.2411	pos	-	-	-	-	-	-	0.004	4.5784	4.3612	4.2646	2.7457	3.688	3.3296	3.7077	4.3412	4.2708	4.3941	4.6761	3.8456	3.9471	4.9876	4.8837	4.8935	4.2356	4.5716	4.8693	4.1908	4.1903	4.4245	4.1339	4.5568	3.8302	4.0038	4.3354	4.1358	3.9984	3.9856	4.0586	4.0662	4.5316	4.4999	4.5487
pos_135	metab_134	metab_134	-	-	180.101	3.2411	pos	-	-	-	-	-	-	0.0047	4.9248	4.7478	4.8438	4.9285	4.8876	4.9386	4.8378	4.9242	4.8062	4.919	5.0212	4.9051	4.9291	4.8963	4.8965	4.8435	4.912	5.0275	4.896	4.9266	4.8529	4.884	4.9023	4.8901	4.824	4.6512	4.7278	4.8177	4.6779	4.7315	4.7317	4.7836	4.8782	4.8394	4.8756
pos_136	metab_135	metab_135	-	-	221.153	3.3245	pos	-	-	-	-	-	-	0.0036	5.0656	5.5818	4.8881	4.7304	4.6801	4.6048	5.0979	5.2063	5.3829	4.8653	5.3453	4.8531	4.7181	5.38	5.3439	5.3054	5.1887	4.9222	5.7041	5.1478	5.3242	5.4231	4.9063	5.4581	5.3785	6.0008	5.8674	5.3677	5.6269	5.624	5.7325	5.7357	5.5046	5.4862	5.5153
pos_137	metab_136	metab_136	-	-	135.116	3.3245	pos	-	-	-	-	-	-	0.0032	4.4377	4.8078	4.5135	4.005	4.4161	3.8398	4.5119	4.7279	4.5694	4.5476	4.8819	4.2436	4.2675	4.92	4.9012	4.8428	4.5807	4.7917	4.9204	4.8586	4.8688	4.9439	4.5859	4.9315	4.6512	5.1644	5.0837	4.698	5.1049	4.844	4.962	4.9425	4.8616	4.8417	4.8687
pos_138	(S,Z)-Lyratol acetate	metab_137	HMDB0031840	-	195.137	3.3245	pos	M+H-H2O, M+H, M+H-2H2O	C12H18O2	63.3	-	-3.11586	79549-21-6	0.0021	5.2556	5.5112	5.1955	4.7252	5.1439	4.7672	5.2661	5.5249	5.3772	5.2866	5.6495	4.9154	5.0061	5.5077	5.5565	5.4495	5.3659	5.3965	5.5842	5.5363	5.5337	5.5889	5.3658	5.6036	5.3047	5.8184	5.7925	5.3397	5.8681	5.5306	5.6416	5.627	5.5366	5.514	5.5264
pos_139	metab_138	metab_138	-	-	314.195	3.5494	pos	-	-	-	-	-	-	0.002	5.0592	5.1501	4.6366	3.3411	4.2834	3.0872	4.9569	5.0698	5.0463	4.6897	5.2223	4.0117	4.1572	5.1945	5.2128	5.0798	5.1229	4.3655	5.4696	4.9424	5.0401	5.1663	4.8659	5.2487	4.9632	5.5075	5.519	4.9092	5.3573	5.091	5.2349	5.1868	5.1611	5.1378	5.1354
pos_140	metab_139	metab_139	-	-	171.137	3.6936	pos	-	-	-	-	-	-	0.0036	4.0333	4.5337	3.8552	4.2854	2.9158	2.4328	4.3872	4.3423	4.2098	3.5204	4.842	3.3781	3.8057	4.9401	4.7315	4.8097	3.8782	3.8082	4.5341	4.3013	4.0227	4.4593	3.7374	4.2981	3.9142	4.1997	4.5067	3.8986	4.2824	4.0354	4.1352	4.105	4.4522	4.4271	4.4444
pos_141	metab_140	metab_140	-	-	389.179	3.8782	pos	-	-	-	-	-	-	0.0027	5.5186	5.7104	5.384	4.9731	5.2053	4.9244	5.5947	5.7191	5.2768	5.264	5.3178	4.7178	5.0222	5.555	5.5744	5.4818	5.6999	5.2335	5.8592	5.6275	5.6487	5.7231	5.6381	5.7489	5.601	6.3593	6.2107	5.7265	6.3099	5.9904	6.1218	6.0647	5.7637	5.7703	5.8005
pos_142	7-Oxo-11-dodecenoic acid	metab_141	LMFA01060182	-	195.137	3.8378	pos	M+H-H2O, M+H, M+H-2H2O	C12H20O3	56.5	-	-2.78597	-	0.0034	5.6976	5.8971	5.5751	5.171	5.4233	5.1341	5.7805	5.8923	5.5129	5.5047	5.544	4.9761	5.2144	5.7376	5.7891	5.6708	5.8696	5.4678	6.0114	5.8153	5.8426	5.9149	5.8265	5.9178	5.7818	6.4412	6.3136	5.9254	6.4049	6.1328	6.2619	6.2216	5.9484	5.9433	5.9892
pos_143	metab_142	metab_142	-	-	399.2	3.9997	pos	-	-	-	-	-	-	0.0052	5.1749	5.6793	4.6525	4.2173	4.7424	4.0644	5.3497	5.4506	5.8205	5.0906	5.9078	5.0344	4.5823	5.5297	5.5729	5.4976	5.3197	5.0103	5.7695	4.9713	5.5464	5.165	4.8445	5.6101	5.425	6.0823	6.3215	5.3707	6.0131	5.7072	5.8562	5.8718	5.6603	5.5964	5.6731
pos_144	metab_143	metab_143	-	-	255.158	3.9393	pos	-	-	-	-	-	-	0.0057	4.1998	4.3839	3.8953	3.2434	3.5612	3.2562	4.251	4.3868	4.1392	4.3303	4.6523	3.2982	3.67	4.4411	4.6298	4.382	4.4794	3.9252	4.6903	4.386	4.2936	4.848	4.2937	4.4547	4.0808	4.8174	5.001	4.2849	4.8568	4.4394	4.6485	4.5843	4.5704	4.5178	4.506
pos_145	metab_144	metab_144	-	-	429.117	4.1629	pos	-	-	-	-	-	-	0.0086	4.8762	4.5799	4.8168	4.9703	4.9573	5.038	4.8189	4.7355	4.8558	4.828	4.7609	4.9093	4.9833	4.6133	4.6324	4.7284	4.7863	4.6207	4.6479	4.7675	4.6385	4.4696	4.7813	4.5538	4.8399	4.582	4.6229	4.8319	4.6345	4.7946	4.7276	4.7656	4.7947	4.6891	4.711
pos_146	metab_145	metab_145	-	-	265.179	4.1228	pos	-	-	-	-	-	-	0.0034	4.263	4.514	3.8978	3.2163	4.2422	3.3726	4.7567	4.6464	4.3642	4.392	4.8103	3.7408	4.1668	4.995	4.9975	4.9214	4.454	4.5425	4.7639	4.5689	4.7252	5.0804	4.1835	4.8374	4.4367	5.0486	4.9552	4.4496	4.925	4.7035	4.7953	4.7467	4.7942	4.7741	4.7562
pos_147	metab_146	metab_146	-	-	161.132	4.3045	pos	-	-	-	-	-	-	0.0052	3.9428	4.3093	3.6674	3.8852	3.3734	3.2899	4.1499	4.1185	4.0031	3.8038	4.4666	3.4476	3.5804	4.4959	4.37	4.4245	3.8543	3.782	4.2925	4.0376	4.0344	4.1828	3.8008	4.1347	3.8394	4.3425	4.4383	3.8366	4.3674	4.1045	4.1843	4.1767	4.2372	4.2088	4.1771
pos_148	metab_147	metab_147	-	-	374.304	4.3453	pos	-	-	-	-	-	-	0.0038	3.4576	3.7038	2.9668	2.8357	2.9112	2.8485	2.9868	3.9254	3.5713	4.0793	3.1347	2.8905	2.9177	4.9728	4.8411	4.8273	3.9061	4.2228	4.3369	3.7019	3.8129	5.1422	4.1697	4.1623	3.7039	4.6642	4.8796	3.9097	4.3635	4.1658	4.2585	4.2291	4.4861	4.5137	4.534
pos_149	metab_148	metab_148	-	-	163.148	4.5262	pos	-	-	-	-	-	-	0.0043	3.8202	4.4504	3.7548	2.964	3.4821	2.9768	4.2266	4.3409	4.1911	3.6159	4.7581	3.0188	3.0906	4.8492	4.6962	4.7439	3.9763	4.2203	4.5392	4.1542	4.3901	4.3773	3.7959	4.4411	3.9796	4.5818	4.8689	4.1953	4.7007	4.3031	4.4853	4.4806	4.4829	4.4696	4.5213
pos_150	Corchorifatty acid F	metab_149	HMDB0035919	-	293.21	4.6476	pos	M+H-2H2O, M+H-H2O, M+H	C18H32O5	-	82.5	-3.41474	95341-44-9	0.0063	4.0397	4.2051	3.3225	3.1351	3.4209	3.148	3.5059	4.0552	4.2564	4.4198	4.6394	3.6813	3.2172	4.4653	4.6214	4.4509	3.7272	3.9172	4.2953	3.8117	4.0216	4.4055	4.0113	4.1215	4.0205	5.1918	5.249	4.8114	5.2655	4.9291	5.022	5.0361	4.6758	4.6116	4.6646
pos_151	metab_150	metab_150	-	-	226.179	4.6863	pos	-	-	-	-	-	-	0.0026	5.7132	5.4791	5.6588	5.7674	5.7389	5.8287	5.6948	5.5796	5.6722	5.6769	5.5272	5.7541	5.7763	5.4731	5.4716	5.5181	5.6271	5.5019	5.4663	5.578	5.5139	5.388	5.6419	5.4847	5.7123	5.4439	5.4918	5.6384	5.5519	5.6084	5.5474	5.5796	5.5834	5.5598	5.5426
pos_152	metab_151	metab_151	-	-	363.252	5.146	pos	-	-	-	-	-	-	0.0021	4.1864	3.8471	3.6918	2.9403	3.4344	3.3042	3.0915	4.2712	3.0888	4.0449	3.9092	3.6434	3.0223	5.0295	4.8589	4.8751	4.5197	5.1681	4.5704	4.0062	3.4608	5.5198	4.416	4.3443	3.1229	4.0583	4.547	4.5382	4.345	3.8575	3.7982	4.0598	4.5511	4.5702	4.5769
pos_153	Glycocholic Acid	metab_152	HMDB0000138;HMDB0000331;LMST05030001	C01921	430.294	4.868	pos	M+H-2H2O, M+H, M+H-H2O	C26H43NO6	87.5	-	-2.92305	475-31-0	0.0039	5.0514	5.4437	4.1092	5.3768	4.551	4.3017	4.9776	5.2175	6.3554	4.2901	5.6041	4.6676	4.5413	5.4484	5.3031	5.3726	4.2226	4.7383	4.9062	4.6889	4.1198	5.42	4.1338	4.7091	4.307	4.6911	5.371	4.4763	4.8445	4.3333	4.5456	4.6995	5.2463	5.2107	5.2358
pos_154	Epimetendiol	metab_153	HMDB0006012	-	301.251	5.6587	pos	M+H-H2O, M+H, M+H-2H2O	C21H34O2	-	63.6	-3.80277	132830-78-5	0.0054	4.2433	4.723	3.2962	3.2618	3.8228	3.1779	3.8803	4.3554	4.3788	4.4107	4.2635	4.0228	3.2471	5.2392	5.1607	5.1118	3.9472	3.8033	4.2867	3.8922	3.4496	5.2858	4.5828	3.7277	3.3477	3.5679	3.5474	3.4256	3.5769	3.49	3.5259	3.5139	4.6195	4.6279	4.5706
pos_155	3a,7a,12b-Trihydroxy-5b-cholanoic acid	metab_154	HMDB0000312	-	373.272	5.6587	pos	M+H-2H2O, 2M+Na, 2M+H	C24H40O5	-	83.4	-3.36621	71883-64-2	0.0111	4.1037	5.2198	3.091	3.6705	3.4211	3.7946	4.4609	4.7649	4.8229	3.1346	5.6163	4.2075	4.3069	4.8524	4.7462	4.7428	3.1486	3.7962	3.9624	4.0312	3.2443	5.5798	3.3066	3.6491	3.8554	4.161	4.5997	4.0229	4.2129	4.0028	3.9224	3.9988	4.5338	4.6272	4.4868
pos_156	metab_155	metab_155	-	-	251.2	5.0058	pos	-	-	-	-	-	-	0.0018	5.0428	5.3901	4.4322	4.353	4.5736	4.0517	5.0652	5.1497	5.1782	4.3883	5.2726	4.2163	3.8408	5.1792	5.0785	5.1029	5.0942	4.7374	5.5212	4.8878	5.2244	4.7848	4.5406	5.3515	5.0451	5.4597	5.7366	4.9798	5.439	5.2057	5.3049	5.2906	5.1846	5.1749	5.1932
pos_157	metab_156	metab_156	-	-	193.158	4.9678	pos	-	-	-	-	-	-	0.0025	5.4942	5.2696	5.4495	5.5925	5.5486	5.6032	5.4576	5.3445	5.4522	5.4618	5.3334	5.5405	5.5719	5.2341	5.2433	5.3325	5.4072	5.2854	5.2535	5.3516	5.2848	5.1567	5.4339	5.2631	5.4987	5.2213	5.2333	5.4275	5.2992	5.4194	5.3635	5.3581	5.3787	5.3517	5.3442
pos_158	metab_157	metab_157	-	-	343.262	4.5066	pos	-	-	-	-	-	-	0.0029	4.4255	4.7962	4.5289	4.9692	3.3943	4.426	3.7284	4.8502	4.2717	4.7509	3.618	4.134	4.1995	5.5855	5.4348	5.4858	4.9423	4.6809	5.2199	4.8789	4.3416	4.8709	4.8884	4.9099	4.3015	5.0823	5.5614	4.7494	4.4918	4.735	4.7942	4.9289	5.1189	5.101	5.1421
pos_159	metab_158	metab_158	-	-	223.168	4.4656	pos	-	-	-	-	-	-	0.003	5.3968	5.8141	5.2423	4.871	5.0882	4.7722	5.4795	5.6623	5.5198	5.2878	5.7224	4.9759	4.8709	5.4898	5.5353	5.4697	5.5718	5.3396	5.8676	5.5904	5.6384	5.456	5.502	5.7577	5.4688	5.8984	6.0801	5.5756	5.9068	5.6112	5.7361	5.7368	5.6209	5.6017	5.6485
pos_160	metab_159	metab_159	-	-	373.185	3.7763	pos	-	-	-	-	-	-	0.001	4.2843	4.9782	3.9599	3.537	2.9418	2.8792	4.544	4.7277	3.9159	3.9335	4.8312	3.4993	2.9557	5.0648	4.8932	4.8771	4.3861	4.0125	4.7606	4.5554	4.4598	4.5233	4.2721	4.587	4.2653	5.0146	4.9757	4.3635	5.0458	4.572	4.749	4.7655	4.6974	4.6935	4.7061
pos_161	Bis(2-ethylhexyl) phthalate	metab_160	-	-	391.283	9.1763	pos	M+H, M+Na, 2M+Na	C24H38O4	71.3	-	-3.70995	-	0.0018	6.575	6.371	6.553	6.6794	6.6831	6.739	6.6414	6.5063	6.5692	6.55	6.4892	6.7064	6.6498	6.3687	6.3878	6.4333	6.5528	6.3892	6.3361	6.4457	6.4014	6.2516	6.52	6.3711	6.6589	6.3217	6.3984	6.6482	6.4903	6.5859	6.4949	6.5392	6.4912	6.4597	6.4662
pos_162	metab_161	metab_161	-	-	193.158	8.7686	pos	-	-	-	-	-	-	0.0043	4.9717	4.3722	4.5601	4.3596	4.8754	4.6993	4.411	4.6761	4.2915	4.4863	4.0444	4.522	4.6108	3.8983	4.7581	3.3046	4.3324	4.1337	4.2669	4.3598	4.4679	4.0888	4.777	4.4253	4.4166	3.6906	4.5479	4.5338	4.6739	4.3031	4.152	4.4062	4.5536	4.5291	4.5308
pos_163	metab_162	metab_162	-	-	253.142	3.7351	pos	-	-	-	-	-	-	0.0071	3.4119	3.9413	3.1512	3.02	3.0956	3.0329	3.285	3.6611	3.3952	3.4733	3.7802	3.0749	3.1021	4.109	4.1092	3.9695	3.2187	4.3342	4.1097	3.3903	4.4159	5.1552	3.2476	4.3718	3.7745	4.7666	4.0458	3.4912	4.2484	4.1707	4.256	4.1981	4.2191	4.1511	4.1987
pos_164	metab_163	metab_163	-	-	251.163	3.7351	pos	-	-	-	-	-	-	0.009	3.9063	4.2992	3.9089	3.4651	3.139	3.2058	3.8008	4.0846	4.0769	4.2127	4.191	3.6591	3.8344	4.4176	4.5199	4.3839	4.093	3.8542	4.4892	4.1716	4.2869	4.4566	4.1859	4.3796	4.1865	4.8131	4.6939	4.2498	4.7245	4.4496	4.5831	4.5367	4.4256	4.419	4.4065
pos_165	metab_164	metab_164	-	-	161.132	3.3032	pos	-	-	-	-	-	-	0.0054	4.3647	4.5561	4.1345	4.2621	4.1341	4.2328	4.4728	4.4506	4.4072	4.2699	4.6779	4.2821	4.2434	4.6602	4.5479	4.564	4.3206	4.3257	4.5043	4.3859	4.3746	4.4989	4.1833	4.4829	4.3643	4.7582	4.6497	4.3727	4.7144	4.5038	4.5959	4.5509	4.5512	4.4888	4.5297
pos_168	metab_167	metab_167	-	-	156.033	14.0144	pos	-	-	-	-	-	-	0.0198	5.1143	4.9859	5.0817	5.0435	5.1406	5.2797	5.2209	5.1288	5.2383	5.1139	5.1094	5.3674	5.3255	4.9987	4.9916	5.0586	4.9667	4.8163	4.9454	4.9528	5.0274	4.8316	5.1772	4.9648	4.9886	4.8003	4.8249	4.998	4.7956	4.993	4.9224	4.9101	4.8846	5.0288	5.0658
pos_169	metab_168	metab_168	-	-	273.916	14.0327	pos	-	-	-	-	-	-	0.0072	5.9195	5.6998	5.8514	5.9274	5.8773	6.0744	5.9089	5.77	5.8599	5.883	5.6471	5.9289	5.9258	5.6588	5.6487	5.6863	5.7551	5.6387	5.6847	5.684	5.7343	5.5254	5.8413	5.6696	5.7386	5.5847	5.5693	5.742	5.5577	5.7262	5.7105	5.7325	5.6572	5.6725	5.753
pos_172	metab_171	metab_171	-	-	168.016	14.0144	pos	-	-	-	-	-	-	0.01	5.5164	5.3605	5.4815	5.5532	5.596	5.7	5.5915	5.4948	5.6015	5.5611	5.4179	5.676	5.6865	5.3681	5.3683	5.421	5.4137	5.275	5.334	5.4031	5.4076	5.2346	5.5208	5.3465	5.4228	5.2301	5.2447	5.4305	5.2447	5.4127	5.3492	5.362	5.3313	5.4067	5.4496
pos_180	metab_179	metab_179	-	-	167.012	14.0144	pos	-	-	-	-	-	-	0.0125	6.5301	6.3682	6.4789	6.4941	6.58	6.7091	6.6192	6.498	6.6172	6.573	6.4139	6.6761	6.6699	6.3714	6.3931	6.4138	6.3812	6.2501	6.3499	6.3793	6.4231	6.228	6.5313	6.3694	6.3909	6.2023	6.2172	6.387	6.1947	6.3738	6.3321	6.3419	6.2874	6.4008	6.4618
pos_181	metab_180	metab_180	-	-	158.048	14.0144	pos	-	-	-	-	-	-	0.0164	5.9862	5.8403	5.9796	5.9826	6.016	6.1582	6.0973	5.9867	6.1053	6.0269	5.9258	6.2034	6.1674	5.8635	5.8696	5.9111	5.8656	5.7405	5.8156	5.8352	5.9122	5.7111	6.0364	5.8312	5.8797	5.6784	5.6978	5.8739	5.6946	5.8577	5.8319	5.8199	5.7513	5.8839	5.952
pos_182	metab_181	metab_181	-	-	181.064	14.0144	pos	-	-	-	-	-	-	0.0124	6.0116	5.91	6.0183	6.0478	6.0525	6.2119	6.1251	6.0347	6.1527	6.0807	5.9563	6.2212	6.1931	5.893	5.9169	5.9312	5.9204	5.8011	5.8666	5.8589	5.9613	5.747	6.0779	5.8876	5.962	5.7649	5.8135	5.9694	5.7787	5.974	5.8883	5.9139	5.8624	5.9121	5.9913
pos_185	metab_184	metab_184	-	-	635.163	3.2001	pos	-	-	-	-	-	-	0.0067	4.3924	5.2622	4.8516	4.0607	4.5627	4.0735	4.845	5.0947	4.2093	4.44	5.0235	4.4888	4.7045	5.3661	5.2019	5.2495	4.9474	4.9013	4.9096	5.4813	5.3034	4.3552	4.8394	5.2786	4.5459	5.2856	4.8522	4.6635	4.6957	4.8899	4.9841	4.9819	5.0921	5.0609	5.1109
pos_186	metab_185	metab_185	-	-	299.127	3.1164	pos	-	-	-	-	-	-	0.0045	5.2188	5.5952	5.4246	4.6944	5.0511	4.485	5.1612	5.5555	5.5427	5.5801	5.7311	5.18	5.2601	5.7787	5.8159	5.71	5.5027	5.7802	5.6201	5.7472	5.6322	4.6729	5.4031	5.697	5.3695	5.9576	5.699	5.6649	5.634	5.5803	5.6348	5.583	5.6296	5.6297	5.6825
pos_187	metab_186	metab_186	-	-	281.149	3.0763	pos	-	-	-	-	-	-	0.004	5.3743	5.7305	5.144	4.4538	5.0889	4.5261	5.3829	5.6553	5.3538	5.2811	5.6181	4.8385	4.9995	5.6743	5.6532	5.6122	5.4526	5.3402	5.8092	5.4337	5.5699	5.6456	5.3747	5.6755	5.2104	5.8588	5.8565	5.3869	5.9228	5.6146	5.7263	5.6885	5.6578	5.6556	5.6053
pos_188	metab_187	metab_187	-	-	175.148	3.055	pos	-	-	-	-	-	-	0.0027	4.4698	5.0083	4.4892	3.8626	4.3157	3.6479	4.6344	4.8286	4.64	4.4812	4.9576	4.0965	4.4477	5.0887	5.0106	4.9922	4.5753	4.5063	5.0273	4.8628	4.9267	5.1046	4.567	4.9784	4.8623	5.5036	5.4067	5.0623	5.3601	5.1996	5.2658	5.2811	5.074	5.0584	5.0892
pos_189	metab_188	metab_188	-	-	243.052	2.9343	pos	-	-	-	-	-	-	0.0025	5.5153	5.2719	5.6516	5.051	5.1924	5.9533	5.4107	5.0664	5.0805	5.3395	4.7251	5.1807	5.1327	4.7123	5.1686	4.5583	5.4054	5.0013	4.9511	5.2729	5.2404	4.3368	4.892	5.0806	5.5555	4.0186	4.5485	5.4031	4.9706	4.8277	4.6518	4.8233	5.1573	5.1335	5.1555
pos_190	metab_189	metab_189	-	-	103.054	2.9343	pos	-	-	-	-	-	-	0.0027	4.5613	5.0386	4.9454	4.1372	4.7496	4.0411	4.5523	5.0282	5.038	4.7689	5.295	4.5942	4.7567	5.5878	5.4817	5.475	5.1478	5.4922	5.6767	5.0463	5.018	5.074	4.7895	5.3845	4.439	4.9908	4.8284	4.884	5.072	4.7761	4.8656	4.9129	5.2162	5.2032	5.2339
pos_191	Cinnamoylglycine	metab_190	HMDB0011621	-	206.081	2.9343	pos	M+H, M+Na, 2M+K	C11H11NO3	88	-	-3.23582	16534-24-0	0.0046	4.9793	5.4658	5.4194	4.4473	5.195	4.3148	4.9668	5.4987	5.5313	5.1587	5.756	4.9947	5.1488	6.077	5.9527	5.9546	5.6513	5.9809	6.1766	5.518	5.4818	5.52	5.2519	5.8749	4.6949	5.3351	5.0876	5.3394	5.2993	5.0631	5.1547	5.2055	5.7054	5.6523	5.7078
pos_192	2,6,10,10-Tetramethyl-1-oxaspiro[4.5]decan-6-ol	metab_191	HMDB0037907	-	177.163	2.9343	pos	M+H-2H2O, M+H, M+H-H2O	C13H24O2	-	55.8	-2.9161	53398-90-6	0.0021	4.3217	4.9025	4.5517	3.8304	4.4948	3.5793	4.6621	4.8243	4.2608	4.5287	4.9671	4.2164	4.691	5.3486	5.2188	5.2143	4.3744	4.6134	4.8877	5.0533	5.1255	5.3124	4.5416	5.078	5.0993	5.6747	5.4527	5.1722	5.5293	5.3587	5.4637	5.4489	5.2268	5.2119	5.2414
pos_193	metab_192	metab_192	-	-	130.065	2.3397	pos	-	-	-	-	-	-	0.0018	6.0635	6.1064	5.9668	5.5507	5.8736	5.38	6.1801	6.1885	6.0462	6.1776	6.4292	5.7074	5.8296	6.5397	6.4996	6.4753	6.0896	6.4235	6.4436	6.2604	6.2272	6.4442	6.1739	6.3397	6.1564	6.4216	6.372	6.2448	6.4198	6.2498	6.3058	6.2737	6.3502	6.3307	6.3545
pos_194	metab_193	metab_193	-	-	179.106	2.3397	pos	-	-	-	-	-	-	0.0016	5.0363	5.2399	4.9985	5.0521	5.0133	5.0642	5.0419	5.2002	5.0002	5.0293	5.1277	5.065	5.0431	5.2746	5.2392	5.2573	5.0032	5.1245	5.2214	5.1063	5.2492	5.1172	5.0086	5.2207	5.2162	5.6694	5.4441	5.3558	5.6084	5.4484	5.5072	5.4667	5.2999	5.3109	5.309
pos_195	metab_194	metab_194	-	-	266.101	2.259	pos	-	-	-	-	-	-	0.0016	4.5532	5.0231	4.8708	3.6437	4.1836	4.0632	5.0079	5.1514	4.55	4.6219	5.0287	4.3237	4.5485	5.3947	5.2753	5.2767	4.9185	5.2401	5.3985	5.1445	5.1853	5.7752	4.5718	5.2907	4.6194	5.3839	5.1635	5.274	4.8095	4.988	5.0243	5.0237	5.2354	5.2329	5.2251
pos_196	metab_195	metab_195	-	-	297.143	2.259	pos	-	-	-	-	-	-	0.0015	5.448	5.8266	5.3154	4.7151	5.1818	4.4763	5.5116	5.7373	5.4162	5.3296	5.7391	5.146	5.2021	5.9735	5.8862	5.8471	5.5396	5.4269	6.0034	5.6078	5.797	5.995	5.4969	5.862	5.3827	6.1559	6.0282	5.4655	6.0342	5.7834	5.9091	5.8715	5.8258	5.8162	5.8327
pos_197	metab_196	metab_196	-	-	223.132	2.218	pos	-	-	-	-	-	-	0.0025	3.8391	4.2064	3.8451	3.0924	3.755	2.7717	3.8142	4.1909	4.2499	4.0968	4.2007	3.6716	3.8475	4.3769	4.3988	4.3445	4.0327	4.1101	4.3708	4.338	4.2519	4.3015	3.9763	4.4603	4.3899	4.8791	4.8028	4.4688	4.8009	4.6725	4.7884	4.7008	4.474	4.4855	4.4645
pos_198	metab_197	metab_197	-	-	257.08	2.1777	pos	-	-	-	-	-	-	0.0021	4.3831	5.078	4.5338	4.4701	4.0798	4.2253	4.7198	4.796	4.1209	4.1746	5.1259	4.0271	4.4322	5.1853	5.0383	5.0734	4.2962	4.1441	4.5588	4.8205	4.3653	3.9154	4.2254	4.5542	4.4893	4.8411	4.9187	4.4419	5.0587	4.754	4.8914	4.8408	4.8211	4.8168	4.7956
pos_199	metab_198	metab_198	-	-	219.076	2.1777	pos	-	-	-	-	-	-	0.0038	4.8632	5.0144	4.795	4.0762	4.7366	3.9533	5.0701	5.1364	4.7345	4.8914	5.0224	4.4493	4.901	5.6265	5.5236	5.5048	4.9369	5.4499	5.4826	5.2477	5.4179	5.3939	5.0046	5.4863	5.3106	5.7878	5.6342	5.4087	5.6675	5.4898	5.6101	5.5708	5.4649	5.4139	5.4587
pos_200	metab_199	metab_199	-	-	200.127	2.1373	pos	-	-	-	-	-	-	0.005	4.0276	4.3078	4.0541	3.9769	4.1024	4.018	4.0096	4.2041	3.9483	4.0704	4.3946	4.0048	4.0854	4.5161	4.4531	4.4657	4.0585	4.192	4.3042	4.1744	4.2442	4.4619	4.0781	4.2853	4.2126	4.6187	4.4096	4.0752	4.6268	4.3625	4.4675	4.4605	4.3616	4.3276	4.3691
pos_201	N-isovalerylglycine	metab_200	-	-	160.096	1.7141	pos	M+H-H2O, M+H, M+Na	C7H13NO3	50.9	-	-2.60153	-	0.0027	5.302	5.2786	5.3823	4.6557	5.012	4.8454	5.291	5.5028	5.0874	5.3399	5.4768	4.9272	5.1978	5.7979	5.7187	5.7436	5.3666	5.693	5.8009	5.7466	5.2551	5.9543	5.4185	5.6106	5.4178	5.4584	5.5544	5.3177	5.6743	5.4095	5.4775	5.4162	5.5858	5.5634	5.6056
pos_202	L-alpha-Amino-1H-pyrrole-1-hexanoic acid	metab_201	HMDB0040551	-	179.117	1.6951	pos	M+H-H2O, M+H, M+H-2H2O	C10H16N2O2	56.4	-	-3.30266	156539-32-1	0.0028	4.8444	5.0965	4.7716	4.4532	4.462	4.4195	4.9313	4.9661	4.8035	4.8272	5.0414	4.5494	4.6968	5.0127	5.0372	4.9725	4.8836	4.8225	4.9461	5.0999	5.2055	5.0996	4.8492	5.1192	4.6712	5.0456	4.9437	4.7844	4.8897	4.778	4.8357	4.8102	5.0022	4.974	4.9953
pos_203	metab_202	metab_202	-	-	146.06	1.6951	pos	-	-	-	-	-	-	0.0039	5.3693	5.3427	5.3842	5.0585	5.309	5.0035	5.4691	5.4417	5.3498	5.5667	5.2913	5.2187	5.6277	6.2789	6.1532	6.2016	5.2358	5.7522	5.8893	5.6136	5.8326	6.1018	5.5815	5.8719	5.2276	5.5477	5.5605	5.4689	5.3544	5.3738	5.3987	5.3883	5.7799	5.8067	5.8356
pos_204	metab_203	metab_203	-	-	324.107	1.6751	pos	-	-	-	-	-	-	0.0044	4.3078	3.5545	4.0902	3.0948	4.0276	2.814	4.6066	4.4453	4.0335	4.3645	4.2104	3.7775	4.8175	5.4539	5.2887	5.3504	3.9641	4.8318	5.0992	4.3325	5.0212	3.0954	4.5331	5.0085	4.3189	4.566	4.4333	4.4526	4.0908	4.1961	4.288	4.1967	4.901	4.9325	4.9143
pos_205	metab_204	metab_204	-	-	390.138	1.6751	pos	-	-	-	-	-	-	0.0041	4.0872	4.5868	4.1991	3.8545	4.1379	3.3764	4.2868	4.3617	3.9854	4.0519	4.6197	4.0635	4.4612	5.0976	4.9819	5.0205	3.97	3.8689	4.6767	4.3148	4.231	4.0653	4.0351	4.4057	4.7168	4.8986	5.4735	4.5062	5.5838	5.0691	5.2023	5.1901	4.8714	4.8793	4.8766
pos_206	metab_205	metab_205	-	-	190.143	0.7248	pos	-	-	-	-	-	-	0.0037	4.6385	4.6163	4.6693	4.6011	4.6827	4.6685	4.649	4.6539	4.7416	4.9344	4.8098	4.9673	5.1746	5.0005	4.8958	4.9043	4.5497	4.6311	4.5455	4.6336	4.7054	4.8497	4.6492	4.6529	4.6538	4.5982	4.6903	4.6569	4.6941	4.7302	4.7559	4.712	4.711	4.7434	4.6993
pos_207	metab_206	metab_206	-	-	612.715	0.5584	pos	-	-	-	-	-	-	0.0077	5.2264	4.9993	5.2855	4.1479	4.8295	3.9676	4.6696	5.096	4.7235	5.0418	5.0576	4.4707	5.2966	4.7329	4.8777	4.9798	4.9736	4.7075	4.8089	5.0928	5.0047	4.537	4.862	4.6169	5.0839	4.587	4.9509	5.1863	4.8981	5.133	4.9969	5.0614	5.0217	4.9839	5.0367
pos_208	metab_207	metab_207	-	-	409.18	0.6852	pos	-	-	-	-	-	-	0.0037	2.0009	2.1091	1.9782	1.8486	1.9232	1.8612	1.9981	2.1045	1.9954	2.0214	2.1448	1.9027	1.9296	2.2009	2.1828	2.1902	2.0353	2.0702	3.3855	2.1298	2.1303	2.1401	2.011	2.146	5.8969	5.6922	5.9442	5.485	5.8734	5.6591	5.7992	5.6948	5.1492	5.1956	5.1593
pos_209	metab_208	metab_208	-	-	196.096	0.7248	pos	-	-	-	-	-	-	0.0031	4.7366	4.7538	4.8162	4.3277	4.6989	4.3968	4.7107	4.7521	4.6496	4.8336	4.7292	4.5849	4.7647	5.0243	4.9105	4.972	4.7003	4.8638	4.9395	4.85	4.815	5.1219	4.8376	4.8744	4.5677	4.8498	4.7766	4.6353	4.7849	4.684	4.7577	4.6647	4.8207	4.8233	4.8592
pos_210	metab_209	metab_209	-	-	274.102	0.7248	pos	-	-	-	-	-	-	0.0032	4.9468	4.9332	5.0776	4.7308	5.1066	4.5443	5.0932	5.0352	4.9432	4.9722	5.2259	4.7481	5.0211	5.2143	5.0794	5.1804	5.0108	5.0488	5.1245	5.1505	5.1091	5.2596	4.9265	5.1529	5.1839	5.0618	5.1754	4.8531	5.1824	5.1158	5.1769	5.0821	5.0935	5.1007	5.1023
pos_211	metab_210	metab_210	-	-	184.06	0.9239	pos	-	-	-	-	-	-	0.002	5.7628	5.8858	5.7497	5.2369	5.6941	5.0455	5.7642	5.8781	5.8211	5.7761	5.9121	5.5242	5.7531	5.9914	5.9391	6.0452	5.838	5.829	5.9809	5.9552	5.9065	5.8993	5.739	5.918	5.8953	6.1978	5.9374	5.9233	6.0103	5.9754	6.0137	6.0029	5.9659	5.9458	5.9622
pos_212	metab_211	metab_211	-	-	156.065	0.7248	pos	-	-	-	-	-	-	0.0008	5.3812	5.433	5.3689	4.9725	5.2178	4.8838	5.399	5.4097	5.3841	5.3403	5.5174	5.2621	5.3537	5.4527	5.388	5.4421	5.2924	5.1997	5.3665	5.3173	5.297	5.2898	5.2876	5.2978	5.2849	5.4424	5.3612	5.352	5.4732	5.3631	5.414	5.404	5.3727	5.3833	5.3794
pos_213	metab_212	metab_212	-	-	177.102	0.9446	pos	-	-	-	-	-	-	0.002	4.5227	4.6418	4.4909	4.3132	4.1917	4.3144	4.6156	4.6815	4.4615	4.5064	4.8285	4.3758	4.4605	4.815	4.7301	4.796	4.6151	4.4496	4.711	4.6502	4.6794	4.8455	4.5123	4.6746	4.2982	4.6448	4.3498	4.4126	4.4197	4.3227	4.3664	4.3384	4.6182	4.6269	4.6365
pos_214	metab_213	metab_213	-	-	814.678	0.5584	pos	-	-	-	-	-	-	0.0043	5.5185	5.0794	5.1715	4.9613	5.2983	5.0546	4.9346	5.2411	5.4526	5.5037	4.8648	5.3505	5.2426	4.115	4.922	4.9243	5.2923	4.4404	4.6008	4.9805	4.9965	4.5726	5.4092	4.462	4.5394	4.8449	4.9457	5.4298	4.1289	5.0401	4.6917	4.932	5.1581	5.1652	5.1198
pos_215	metab_214	metab_214	-	-	396.161	1.0059	pos	-	-	-	-	-	-	0.0034	4.3268	4.6843	4.4735	3.6832	4.2608	3.4465	4.3757	4.6482	4.474	4.6531	5.016	4.1361	4.1099	5.2276	5.0539	5.18	4.6145	5.0176	4.7626	4.9964	5.0456	5.2707	4.6968	5.038	4.1985	4.993	4.5888	4.2318	4.9555	4.3715	4.4969	4.3543	4.794	4.8039	4.8288
pos_216	metab_215	metab_215	-	-	140.034	0.7248	pos	-	-	-	-	-	-	0.0023	4.7779	4.8907	4.8478	4.4971	4.7965	4.4066	4.8041	4.8477	4.7854	4.7666	4.9623	4.695	4.7987	4.9677	4.8531	4.9736	4.853	4.9469	4.9295	4.999	4.9575	5.0163	4.7867	4.9758	4.8935	5.079	5.0331	4.8873	5.1781	5.0224	5.0946	5.0659	4.9331	4.9498	4.9502
pos_217	metab_216	metab_216	-	-	1002.66	0.5391	pos	-	-	-	-	-	-	0.0158	3.6713	3.7804	3.6484	4.5696	5.5043	4.4704	5.637	4.3098	4.6543	4.1995	5.0759	4.9647	3.5993	3.8728	3.8547	3.8621	4.9185	5.2425	4.6942	5.0413	4.7327	3.8117	5.0213	5.1215	3.6999	3.9201	3.8996	4.6078	3.9292	3.8422	3.8781	3.8661	3.9812	3.9315	3.8499
pos_218	metab_217	metab_217	-	-	245.159	0.7248	pos	-	-	-	-	-	-	0.0076	5.5699	5.6057	5.7231	5.0605	5.7371	5.1635	5.634	5.7171	5.742	5.7205	5.8075	5.5563	5.6254	5.9301	5.7889	5.863	5.6274	5.9081	5.7887	5.8462	5.8616	5.7095	5.7273	5.85	5.5841	5.9459	5.7926	5.5188	5.8506	5.6918	5.7575	5.7151	5.7923	5.73	5.8343
pos_219	metab_218	metab_218	-	-	151.061	0.7248	pos	-	-	-	-	-	-	0.0078	5.252	5.3257	5.2802	5.1485	5.2458	5.0721	5.3263	5.2661	5.283	5.3897	5.3481	5.2	5.2197	5.4131	5.3599	5.3587	5.2572	5.373	5.3281	5.4259	5.4952	5.5568	5.4166	5.4752	5.3064	5.2769	5.3903	5.2003	5.3824	5.353	5.43	5.3557	5.2804	5.3851	5.3373
pos_220	metab_219	metab_219	-	-	188.127	0.7051	pos	-	-	-	-	-	-	0.0034	4.337	4.1768	4.4175	4.1935	4.479	3.9862	4.3139	4.1586	4.2518	4.3401	4.8358	4.7066	4.715	4.9932	4.8057	4.926	4.325	4.3371	4.193	3.9958	4.4701	4.382	3.9746	4.0252	4.0709	4.4431	4.3003	4.3022	4.534	4.2778	4.2896	4.3595	4.4979	4.4609	4.4796
pos_221	metab_220	metab_220	-	-	160.06	0.7051	pos	-	-	-	-	-	-	0.0069	4.9521	4.7421	4.8237	4.7174	4.8212	4.6806	4.7712	4.753	4.8361	4.7268	4.7924	4.7101	4.7958	4.7077	4.6094	4.6916	4.733	4.4229	4.7171	4.5982	4.6213	4.7241	4.7111	4.5684	4.7554	4.9955	4.8143	4.8017	4.9444	4.9008	4.8873	4.9022	4.8145	4.7984	4.8028
pos_222	metab_221	metab_221	-	-	432.777	0.5584	pos	-	-	-	-	-	-	0.0035	4.1954	4.9217	4.5462	3.3107	4.7936	3.1808	4.8466	5.1176	4.3342	4.6942	5.2058	3.4978	4.3848	4.4201	4.8935	4.6096	4.944	5.0286	5.1925	5.2835	5.2054	4.4268	4.6244	5.1215	4.6513	4.4172	4.623	5.0951	4.6051	4.6909	4.5472	4.7002	4.9918	4.9896	4.965
pos_223	metab_222	metab_222	-	-	694.678	0.5584	pos	-	-	-	-	-	-	0.0067	5.607	4.9038	5.7939	4.3257	4.2624	4.4819	3.1549	4.9393	4.9973	5.1255	4.2191	4.6501	5.8746	5.4963	4.8971	5.4289	4.5237	4.0761	3.9421	4.1215	4.2983	4.7737	4.6881	3.3872	5.8564	4.7243	5.3081	5.0584	5.6655	5.6259	5.5574	5.5057	4.8952	4.8894	4.8883
pos_224	metab_223	metab_223	-	-	224.054	1.1954	pos	-	-	-	-	-	-	0.0038	4.0536	4.118	3.7812	2.2719	4.0357	2.2847	3.9532	4.431	3.5278	3.5196	4.6466	2.3265	2.3668	3.6469	3.858	3.6731	3.8549	4.477	4.0985	4.0998	4.1282	4.1283	3.8588	4.2654	3.4706	4.2741	4.2026	3.949	4.8148	3.9922	4.0971	4.0321	4.0278	4.036	4.0218
pos_225	metab_224	metab_224	-	-	544.728	0.5584	pos	-	-	-	-	-	-	0.0058	5.3929	5.1101	5.648	4.004	4.7215	3.8346	4.5744	5.2713	4.7759	5.0934	4.9682	4.253	5.7583	5.4862	5.1374	5.3479	5.0625	4.497	4.9033	5.0999	5.1041	4.7915	4.7913	4.7327	5.8188	4.7372	5.2229	5.2599	5.6618	5.5315	5.4675	5.4321	5.1416	5.184	5.1133
pos_226	metab_225	metab_225	-	-	220.06	1.2371	pos	-	-	-	-	-	-	0.011	4.8323	3.6445	4.6561	2.0012	4.8695	2.2019	5.0722	3.711	2.6252	2.7828	4.7239	2.1537	2.3536	3.3571	3.1934	2.9416	4.2042	4.1153	3.3653	3.5769	3.6783	2.9609	3.1003	3.4127	3.1733	3.1631	3.4476	4.3156	4.7617	2.9336	3.1217	3.1963	3.5014	3.584	3.5502
pos_227	metab_226	metab_226	-	-	458.769	0.5584	pos	-	-	-	-	-	-	0.0081	5.7535	4.8924	5.9463	4.2729	4.1764	4.5424	3.2383	4.9227	4.9455	5.1536	4.2745	4.6345	6.0833	5.7568	4.979	5.595	4.6094	4.1213	4.0582	4.3325	4.3809	4.8122	4.7233	4.0083	6.1182	4.7899	5.4146	4.9793	5.9304	5.7751	5.7201	5.6469	4.907	4.9239	4.8204
pos_228	metab_227	metab_227	-	-	526.756	0.5584	pos	-	-	-	-	-	-	0.0058	6.0328	5.3707	5.9259	5.0175	4.9733	5.1103	4.3924	5.4601	5.6322	5.7409	4.552	5.309	5.9722	5.299	5.3939	5.6582	5.3593	4.268	4.3744	4.7532	4.9653	5.1432	5.3809	4.1981	5.6219	5.2465	5.5714	5.58	5.4402	5.7919	5.6346	5.6741	5.4244	5.4209	5.3473
pos_229	metab_228	metab_228	-	-	848.625	0.5391	pos	-	-	-	-	-	-	0.0072	5.5504	4.9423	5.292	4.6619	4.6499	4.7699	3.875	5.0421	5.2598	5.3888	3.8752	5.0528	5.3641	4.2019	4.8469	5.0638	4.9241	4.0702	3.7231	4.1965	4.494	4.6065	5.0752	2.6928	4.6692	4.7845	4.9416	5.1518	4.346	5.1376	4.9049	4.995	4.943	4.9264	4.9032
pos_230	metab_229	metab_229	-	-	916.612	0.5391	pos	-	-	-	-	-	-	0.0042	5.2617	4.7866	4.8432	4.7114	4.9275	4.8224	4.2033	5.036	5.3488	5.2983	3.6933	5.1795	4.7781	3.34	4.7161	4.6424	5.0035	3.9955	3.6342	4.4079	4.6283	4.3127	5.1841	3.695	3.1672	4.6973	4.6222	5.1999	3.3963	4.6715	4.234	4.5221	4.8859	4.9236	4.8661
pos_231	metab_230	metab_230	-	-	715.746	0.5391	pos	-	-	-	-	-	-	0.0105	3.0754	3.1845	3.0526	3.058	4.8111	3.9095	4.9568	3.9818	4.2521	4.227	4.4801	4.5558	3.0034	3.2769	3.3351	3.2662	4.3534	4.8682	3.99	4.3643	4.081	3.2157	4.4715	4.4671	3.1041	3.3241	3.3037	3.9074	3.3332	3.2463	3.2821	3.2701	3.7268	3.7299	3.6333
pos_232	metab_231	metab_231	-	-	234.133	1.3208	pos	-	-	-	-	-	-	0.0032	4.6237	4.8631	4.6854	4.3082	4.5701	4.1897	4.7539	4.807	4.7983	4.7775	4.9732	4.5584	4.7043	5.0757	5.0499	5.0695	4.7516	4.944	4.9548	4.9573	4.9376	4.9173	4.6426	5.0148	4.5837	5.2562	4.9595	4.9561	5.2736	5.0838	5.1076	5.1081	5.0175	5.0095	4.9854
pos_233	metab_232	metab_232	-	-	256.074	1.3406	pos	-	-	-	-	-	-	0.0057	3.8483	3.966	3.402	2.2829	4.2673	2.6049	3.8164	4.172	3.5883	3.9213	4.1736	3.4014	3.5495	5.6636	5.404	5.5395	4.2111	4.1659	4.2206	4.2095	4.0716	6.3129	3.9877	4.0918	3.2811	4.1039	4.1251	3.6257	4.3203	3.7393	3.9256	3.8935	5.3612	5.2993	5.2785
pos_234	metab_233	metab_233	-	-	934.678	0.5391	pos	-	-	-	-	-	-	0.0045	4.2411	4.5497	3.568	5.0319	5.7004	4.9881	5.6682	4.8784	5.1435	5.0296	5.1903	5.395	3.3767	3.4339	4.1328	3.614	5.296	4.9651	4.9155	5.2277	5.0939	3.6184	5.3568	5.2234	3.2611	4.3527	3.8193	5.0952	3.4902	3.4033	3.4392	3.5515	4.6699	4.7118	4.6784
pos_235	metab_234	metab_234	-	-	456.84	0.5391	pos	-	-	-	-	-	-	0.0077	4.4374	4.8054	3.9694	4.8734	4.752	4.5244	4.8423	3.7633	4.6424	4.4536	4.1514	4.7369	4.1415	3.8603	4.1371	3.9807	4.3948	4.3718	4.2477	4.3135	4.0307	4.0884	4.523	4.4097	4.2158	4.6582	4.4958	4.5811	3.9167	4.4042	4.2142	4.3831	4.0902	4.0152	4.0811
pos_236	metab_235	metab_235	-	-	211.143	1.3799	pos	-	-	-	-	-	-	0.0025	4.4012	4.369	4.2998	4.1614	4.444	4.1309	4.3392	4.4525	4.4808	4.6394	4.8273	4.624	4.801	4.9862	4.9792	4.9496	4.3329	4.5035	4.611	4.5411	4.5411	4.7392	4.4692	4.6266	4.4022	4.7738	4.7204	4.4449	4.7472	4.5527	4.6296	4.5773	4.6954	4.6891	4.692
pos_237	metab_236	metab_236	-	-	700.769	0.5391	pos	-	-	-	-	-	-	0.0132	4.318	4.6751	3.9986	4.769	4.9298	4.3798	4.8841	4.073	4.649	4.4463	4.4685	4.7566	4.1282	3.5048	4.1204	4.0677	4.5319	4.3391	4.2886	4.4552	4.231	3.9898	4.6281	4.4887	4.2078	4.5101	4.4512	4.5787	2.9898	4.4992	4.4341	4.4198	4.1724	4.0319	4.0847
pos_238	Hydroxyphenylacetylglycine	metab_237	HMDB0000735	C05596	210.075	1.3799	pos	M+H, M+Na, 2M+K	C10H11NO4	51.6	-	-3.22108	28116-23-6	0.0018	5.5842	6.0199	5.468	5.8438	5.4637	5.4221	5.935	5.8889	5.5134	5.596	6.1976	5.3924	5.4663	6.2525	6.1139	6.1931	5.5505	5.7625	5.7608	5.5992	5.5779	6.3005	5.5795	5.6931	5.5032	5.8124	5.7768	5.6104	5.9462	5.7129	5.7635	5.7351	5.9423	5.9351	5.9352
pos_239	metab_238	metab_238	-	-	230.101	1.3595	pos	-	-	-	-	-	-	0.0043	4.5363	4.7794	4.5512	3.9699	4.3507	3.9705	4.5091	4.6851	4.6496	4.6532	4.817	4.3721	4.5676	4.9851	4.9284	4.9262	4.5018	4.817	4.882	4.9097	4.8891	4.9769	4.5026	4.9206	4.7045	5.2752	5.0885	4.8565	5.1895	5.0113	5.0893	5.0735	4.9668	4.9218	4.9413
pos_240	metab_239	metab_239	-	-	305.086	1.3595	pos	-	-	-	-	-	-	0.001	5.0639	5.9905	4.8736	4.9426	3.9753	4.2076	4.6424	5.582	5.8306	5.6944	4.5073	5.4129	5.535	6.1648	6.0804	6.1395	5.5584	4.7646	6.0982	5.542	5.6206	5.3136	5.6711	5.7848	5.4531	6.1929	6.0838	5.3612	5.2798	5.9271	5.9824	5.9862	5.9096	5.9075	5.9047
pos_241	metab_240	metab_240	-	-	1018.64	0.5391	pos	-	-	-	-	-	-	0.0124	4.2291	4.6226	3.0433	5.0316	5.525	5.0238	5.3712	4.9253	5.3076	5.1322	4.9296	5.3757	3.2898	3.2676	4.3153	3.2569	5.2739	4.6129	4.7494	5.0706	5.0063	3.4645	5.3788	4.9504	3.0948	4.3828	3.3001	5.1388	3.3239	3.237	3.2728	3.2608	4.7557	4.7496	4.6341
pos_242	metab_241	metab_241	-	-	304.174	1.4002	pos	-	-	-	-	-	-	0.0015	5.0557	5.3586	4.9899	4.253	4.7932	4.0293	5.0676	5.3087	5.2075	5.2026	5.4309	4.832	4.8013	5.7898	5.6976	5.7616	5.1558	5.4416	5.3873	5.3512	5.3996	5.7474	4.9534	5.4706	5.1927	5.55	5.4311	4.9814	5.6161	5.3644	5.4685	5.4253	5.5147	5.5063	5.5298
pos_243	metab_242	metab_242	-	-	426.821	0.5391	pos	-	-	-	-	-	-	0.004	5.6279	5.5013	5.1897	5.5833	5.9592	5.6499	5.7592	5.6419	5.8608	5.8262	5.51	5.8404	5.122	4.0752	5.3071	5.0952	5.7965	5.1793	5.3359	5.6071	5.5443	5.0045	5.869	5.3924	4.405	5.3229	5.1468	5.8218	4.3089	5.1606	4.9104	5.1037	5.5955	5.5988	5.5555
pos_244	metab_243	metab_243	-	-	309.143	1.4204	pos	-	-	-	-	-	-	0.0075	3.7614	3.9487	3.819	2.308	3.2779	2.3208	3.8769	3.8285	3.6109	3.6932	4.1178	2.8468	2.3898	3.9434	3.9341	3.8118	3.8388	3.9309	3.971	3.9645	4.1042	3.9266	3.6028	4.039	3.6476	4.0592	4.0169	3.7987	4.3408	3.7085	3.9597	3.9412	3.8451	3.9221	3.8771
pos_245	metab_244	metab_244	-	-	241.081	1.4411	pos	-	-	-	-	-	-	0.0012	4.6954	4.9061	4.6358	4.1867	4.497	3.9039	4.7282	4.8006	4.6189	4.6682	4.9934	4.3641	4.5225	4.9007	4.9272	4.9166	4.7554	4.6878	4.9322	4.8602	4.859	4.9376	4.6224	4.909	4.4503	5.1993	5.0762	4.7419	5.1369	4.9313	5.0068	5.0226	4.9034	4.9048	4.9173
pos_246	metab_245	metab_245	-	-	295.164	1.4411	pos	-	-	-	-	-	-	0.0067	4.0966	4.3793	4.152	3.0751	3.9558	3.3868	4.1184	4.4608	4.3012	4.4253	4.5721	3.7497	3.8724	4.6872	4.7197	4.6417	4.4384	4.6413	4.6683	4.4304	4.7317	5.2988	4.3348	4.7288	3.7669	4.724	4.5441	4.0342	4.6838	4.4008	4.5076	4.5593	4.6608	4.5893	4.593
pos_247	metab_246	metab_246	-	-	192.065	1.4411	pos	-	-	-	-	-	-	0.0033	4.3879	4.7321	4.2336	4.1556	4.1647	3.8674	4.5766	4.6238	4.4294	4.4161	4.8481	4.1362	4.2066	4.7756	4.759	4.7237	4.3986	4.8375	4.6642	4.6274	4.7805	4.9717	4.3554	4.8365	4.388	4.8745	4.5424	4.4039	4.7475	4.618	4.6674	4.651	4.7209	4.6834	4.7178
pos_248	metab_247	metab_247	-	-	178.049	1.4411	pos	-	-	-	-	-	-	0.0007	4.8665	5.0888	4.8428	4.2678	4.6464	4.1449	4.911	5.1183	4.8447	4.9158	5.2437	4.544	4.7211	4.9382	5.0449	4.9297	4.9828	5.3713	5.0059	5.1555	5.1667	5.0701	4.8432	5.2371	4.5437	4.9186	4.82	4.746	5.1015	4.7701	4.8467	4.8	4.9716	4.9776	4.9799
pos_249	metab_248	metab_248	-	-	297.18	1.4616	pos	-	-	-	-	-	-	0.0037	4.1066	4.1171	4.0946	4.0136	4.0105	3.9078	4.0886	4.1398	4.3245	4.5506	4.6729	4.4943	4.7553	5.0139	4.9655	4.9773	4.1547	4.2423	4.347	4.3029	4.3021	4.8749	4.0393	4.3124	4.1282	4.8218	4.4599	4.2581	4.4639	4.3268	4.4026	4.4385	4.6234	4.5791	4.5916
pos_250	metab_249	metab_249	-	-	186.148	1.4616	pos	-	-	-	-	-	-	0.0064	3.5047	3.8492	3.8867	3.7859	3.7577	3.3213	3.7069	3.8093	3.9879	4.0901	4.2752	3.8023	4.0884	4.6193	4.5706	4.5471	3.8521	3.9759	3.8923	4.182	4.2007	4.3653	3.6569	4.0124	3.8254	4.1871	3.9528	3.8335	4.076	3.8777	3.9845	3.8914	4.1966	4.2305	4.1772
pos_251	metab_250	metab_250	-	-	240.122	1.4411	pos	-	-	-	-	-	-	0.0081	5.2183	5.4177	5.0651	4.3162	5.0038	4.5557	5.1741	5.3875	4.8695	5.2287	5.0548	4.7591	4.736	5.6308	5.5955	5.5668	5.107	5.5579	5.5041	5.2296	5.4674	5.9606	5.2123	5.5107	4.9003	5.4713	5.2531	4.8791	5.3044	5.1767	5.282	5.2398	5.4938	5.3976	5.4817
pos_252	metab_251	metab_251	-	-	265.015	0.4983	pos	-	-	-	-	-	-	0.0208	4.4244	5.6573	4.1267	6.0546	3.4195	5.6416	3.6279	3.1308	4.9395	3.9011	3.0209	5.4842	5.167	4.8059	4.5184	4.4395	3.756	3.5645	4.0143	3.4625	3.3499	4.9038	4.0791	3.7916	5.7193	5.4255	5.5943	4.6127	3.8706	5.6353	5.6652	5.5717	3.7065	3.6332	3.7658
pos_253	metab_252	metab_252	-	-	163.107	0.5188	pos	-	-	-	-	-	-	0.0057	3.4822	3.6845	3.5932	3.2116	3.4633	3.2896	3.4279	3.7534	3.7216	3.7287	3.937	3.5898	3.0584	3.6063	3.7084	3.6606	3.7903	3.6863	3.7487	3.8977	3.8355	4.0286	3.7989	3.8093	3.4718	3.4898	3.4866	3.7528	3.4447	3.4946	3.4503	3.4295	3.6938	3.665	3.7231
pos_254	metab_253	metab_253	-	-	100.024	0.4983	pos	-	-	-	-	-	-	0.012	4.5374	5.2509	4.4035	5.5246	4.0272	5.2418	4.087	3.8289	4.8304	4.3025	3.5811	5.1821	4.9505	4.6344	4.5093	4.5068	4.2242	4.0418	4.1523	3.9779	3.8964	4.7019	4.3632	4.0972	5.3126	5.0155	5.1854	4.6856	4.0681	5.2347	5.2499	5.173	3.9968	3.9837	4.0559
pos_255	metab_254	metab_254	-	-	128.019	0.4983	pos	-	-	-	-	-	-	0.0055	5.1841	5.7186	5.0548	6.0292	4.8679	5.8088	4.8723	4.6614	5.4166	4.9905	4.5407	5.7297	5.5656	5.2175	5.1114	5.1266	4.9183	4.7729	4.8673	4.7698	4.6914	5.2447	5.0279	4.8055	5.8185	5.5442	5.6679	5.2824	4.8275	5.7519	5.7401	5.6842	4.7839	4.7669	4.8105
pos_256	metab_255	metab_255	-	-	143.996	0.1923	pos	-	-	-	-	-	-	0.0026	5.5062	5.3336	5.491	5.6635	5.5522	5.6817	5.5218	5.3701	5.512	5.4824	5.3497	5.5922	5.6193	5.3039	5.2689	5.3553	5.4444	5.3411	5.2873	5.3844	5.323	5.1813	5.4551	5.2929	5.4953	5.2762	5.2859	5.4702	5.3575	5.4446	5.3864	5.4187	5.4014	5.3829	5.376
pos_257	metab_256	metab_256	-	-	201.008	0.04	pos	-	-	-	-	-	-	0.0007	5.0901	4.8989	5.0808	5.195	5.1332	5.2552	5.0953	4.9398	5.0729	5.0228	4.8999	5.1636	5.1757	4.8566	4.8571	4.9395	5.0229	4.9182	4.8653	4.9777	4.9141	4.7592	5.0593	4.8917	5.0447	4.8176	4.8534	5.0453	4.9221	5.0088	4.9384	4.9806	4.9559	4.95	4.9524
pos_258	metab_257	metab_257	-	-	128.95	0.04	pos	-	-	-	-	-	-	0.004	5.386	5.1879	5.3636	5.4984	5.4206	5.5445	5.3855	5.2344	5.3737	5.3411	5.2196	5.4517	5.4692	5.1528	5.1392	5.23	5.3349	5.2213	5.169	5.2832	5.2157	5.0584	5.3417	5.1837	5.3768	5.1536	5.1734	5.3667	5.2292	5.319	5.2513	5.2937	5.2814	5.2511	5.2364
pos_259	metab_258	metab_258	-	-	139.982	0.1268	pos	-	-	-	-	-	-	0.0077	5.1142	4.9004	5.0743	5.1932	5.0903	5.1915	5.0293	4.8768	5.015	4.9918	4.8773	5.1302	5.1179	4.8011	4.8137	4.9357	4.9452	4.8455	4.7919	4.9325	4.8768	4.752	5.0898	4.8879	4.9358	4.6955	4.7531	4.9674	4.8393	4.9449	4.8665	4.906	4.8183	4.8752	4.9116
pos_260	metab_259	metab_259	-	-	130.008	0.2799	pos	-	-	-	-	-	-	0.002	5.0832	4.9069	5.0818	5.2151	5.1205	5.2577	5.1043	4.9428	5.0758	5.0523	4.93	5.1842	5.1893	4.8657	4.8482	4.9351	5.0277	4.9112	4.8575	4.9612	4.8968	4.7606	5.0416	4.8663	5.0712	4.8348	4.8619	5.0611	4.9273	5.0223	4.9476	4.9807	4.9696	4.9496	4.9435
pos_261	metab_260	metab_260	-	-	126.102	0.4983	pos	-	-	-	-	-	-	0.0014	4.8236	4.954	4.8247	4.5637	4.7066	4.3513	4.7956	4.8873	4.873	4.9447	4.7507	4.6429	4.7338	5.0896	5.0373	5.0469	4.9954	4.9815	5.0288	5.1886	5.0955	5.452	5.0628	5.0553	4.8249	5.0921	5.0704	4.7625	4.9178	4.9269	5.001	4.9696	5.0357	5.0534	5.0398
pos_262	metab_261	metab_261	-	-	151.035	0.4983	pos	-	-	-	-	-	-	0.0104	5.1434	5.7802	4.9683	6.0748	4.5143	5.8434	4.6105	4.2843	5.4276	4.8628	3.9097	5.7543	5.5669	5.2317	5.0982	5.0951	4.7736	4.6118	4.784	4.5556	4.4523	5.2985	4.955	4.6977	5.8744	5.6073	5.7437	5.2705	4.6987	5.8157	5.8122	5.7446	4.5717	4.5592	4.6368
pos_263	metab_262	metab_262	-	-	82.5374	0.4983	pos	-	-	-	-	-	-	0.0085	4.8417	5.5594	4.7283	5.835	4.4145	5.5217	4.4755	4.2419	5.117	4.6381	4.0795	5.474	5.2377	4.9088	4.7887	4.7925	4.5762	4.3785	4.478	4.3704	4.2722	4.9825	4.7001	4.4092	5.6169	5.3313	5.5037	4.9779	4.4499	5.5399	5.5492	5.4819	4.368	4.3572	4.404
pos_265	metab_264	metab_264	-	-	136.112	0.3677	pos	-	-	-	-	-	-	0.0005	4.6433	4.4492	4.6132	4.7603	4.6708	4.7888	4.6232	4.4747	4.6208	4.5892	4.4604	4.7031	4.7308	4.4062	4.3987	4.4907	4.5482	4.451	4.4002	4.5158	4.4448	4.3015	4.6085	4.428	4.6013	4.3634	4.3957	4.5837	4.4499	4.5449	4.4922	4.5261	4.4815	4.4832	4.4825
pos_266	metab_265	metab_265	-	-	179.117	0.1923	pos	-	-	-	-	-	-	0.0018	4.3634	4.1484	4.3438	4.465	4.3936	4.5131	4.3534	4.2028	4.3406	4.31	4.1859	4.4184	4.4449	4.1102	4.1154	4.1836	4.2655	4.1753	4.123	4.234	4.1541	4.0222	4.3483	4.1546	4.2907	4.069	4.1247	4.311	4.1915	4.2758	4.2132	4.2371	4.2087	4.2012	4.2211
pos_267	metab_266	metab_266	-	-	113.963	0.028	pos	-	-	-	-	-	-	0.003	5.5758	5.395	5.5625	5.6979	5.6205	5.7397	5.5868	5.4399	5.5692	5.5225	5.404	5.656	5.6687	5.3622	5.3455	5.4338	5.5276	5.4248	5.3643	5.4726	5.4123	5.2587	5.5346	5.3774	5.5706	5.3413	5.3671	5.5589	5.4332	5.5175	5.4486	5.486	5.4815	5.4586	5.4461
pos_268	metab_267	metab_267	-	-	125.038	0.4983	pos	-	-	-	-	-	-	0.0132	3.9476	4.692	3.7597	4.9758	3.2406	4.6915	3.3601	3.0113	4.256	3.6327	2.5988	4.6065	4.3812	4.0288	3.8991	3.8957	3.5457	3.367	3.522	3.3073	3.1816	4.1346	3.7601	3.4226	4.7497	4.4553	4.6164	4.0712	3.4182	4.6816	4.6903	4.606	3.3245	3.3196	3.3511
pos_270	metab_269	metab_269	-	-	111.092	0.4983	pos	-	-	-	-	-	-	0.0036	4.2314	3.9908	4.08	4.1645	4.0964	4.2003	4.1302	3.9407	4.0486	4.0795	3.8947	4.1188	4.1277	3.951	3.9253	3.9899	4.0186	3.8878	3.8936	4.016	3.933	3.9278	4.0192	3.9389	4.1871	3.9152	3.9242	4.0225	3.9172	4.002	3.9753	3.9513	3.9934	3.9685	3.9871
pos_271	metab_270	metab_270	-	-	157.082	0.4983	pos	-	-	-	-	-	-	0.0229	3.2234	3.5772	3.2747	3.4927	3.1904	3.4196	3.2537	2.9602	3.4454	3.1679	3.1127	3.4031	3.3053	3.4354	3.3241	3.4083	3.1694	3.1506	3.1811	3.2191	3.1784	4.1309	3.3197	3.263	3.5468	3.7353	3.5864	3.3329	3.1533	3.6099	3.4491	3.5619	3.0504	3.1098	3.1166
pos_272	metab_271	metab_271	-	-	218.185	0.4983	pos	-	-	-	-	-	-	0.0047	4.3681	3.8454	4.0712	3.3677	3.796	3.9773	4.2163	3.6961	3.292	4.0133	3.904	3.6835	3.0723	3.5301	3.7742	3.6019	3.9953	3.7648	3.8677	4.0974	4.1032	3.8514	3.7089	3.8671	4.3925	3.6645	3.4116	3.7412	3.8869	3.4756	3.3009	3.3081	3.7654	3.7193	3.732
pos_273	metab_272	metab_272	-	-	284.925	0.4983	pos	-	-	-	-	-	-	0.0385	2.3368	4.2411	1.9973	4.8626	1.923	4.0629	1.8075	1.9134	3.0189	1.8307	1.9535	3.8637	3.5045	2.9562	1.9913	1.9987	1.8656	2.2086	1.9573	1.9385	1.939	3.0498	1.8203	1.9547	4.067	3.9371	3.8998	2.1004	2.0921	4.0677	4.1077	3.9914	2.1365	1.9814	2.1513
pos_275	metab_274	metab_274	-	-	251.159	0.5188	pos	-	-	-	-	-	-	0.0151	2.829	3.4255	3.2622	2.5356	2.839	2.5484	2.8481	3.2019	3.0862	3.1942	3.3506	2.5903	2.6174	3.6444	3.3824	3.5122	3.186	3.1814	3.3545	3.4428	3.4935	3.6485	3.2038	3.44	3.5229	3.7613	3.5302	3.4686	3.4927	3.5474	3.4681	3.3917	3.4035	3.3301	3.3884
pos_280	L-Lysine	metab_279	HMDB0000182;HMDB0062809	C00047	147.112	0.5188	pos	M+H, M+2Na-H	C6H14N2O2	75	-	-3.10439	56-87-1	0.0038	4.242	4.0906	4.2159	3.7657	4.2311	3.6405	4.2942	4.4193	4.2378	4.3392	5.045	4.3906	4.2036	4.2934	4.4842	4.4603	4.4543	4.4085	4.3314	4.4499	4.2665	3.9363	4.2946	4.3563	3.9708	4.1768	4.3354	4.453	4.3569	4.1699	4.2141	4.2363	4.4359	4.4661	4.4223
pos_281	metab_280	metab_280	-	-	177.123	0.5391	pos	-	-	-	-	-	-	0.0038	4.5955	4.908	4.7518	4.7112	5.1465	4.7068	5.1223	5.0998	4.866	4.773	5.303	4.7866	4.6585	4.9604	4.8821	4.9716	5.1779	5.2385	5.1428	4.9721	4.8992	5.1477	4.8297	5.0006	5.0048	5.1022	4.9626	5.0026	5.1293	4.9579	5.0202	4.9736	4.996	4.9898	4.9464
pos_282	metab_281	metab_281	-	-	175.118	0.5188	pos	-	-	-	-	-	-	0.0076	4.0289	4.1761	4.0134	3.9304	4.124	3.8626	4.1651	4.1828	4.2246	4.1787	4.5177	4.1015	3.9036	4.1708	4.2613	4.2534	4.2286	4.2711	4.408	4.4019	4.2106	3.9883	4.2407	4.3555	3.9227	4.185	4.1313	4.2017	3.8848	3.9975	3.9391	4.0271	4.1395	4.2032	4.1412
pos_283	metab_282	metab_282	-	-	175.144	0.5188	pos	-	-	-	-	-	-	0.0088	4.0217	4.0556	3.9681	3.1767	3.8221	3.4426	3.722	4.1236	3.9902	3.8984	4.507	4.1487	3.925	4.0952	3.9886	4.1287	3.9763	3.7096	3.8904	4.1058	3.9112	3.8838	3.8803	3.7981	3.157	4.0573	3.8841	4.1187	3.7636	3.6593	3.629	3.7704	4.0306	3.9511	3.9418
pos_285	metab_284	metab_284	-	-	288.918	0.5188	pos	-	-	-	-	-	-	0.0194	4.4171	4.5844	3.9314	4.7539	4.3087	4.4816	4.3115	3.9231	4.6714	4.4074	2.9548	4.6339	4.4129	3.6158	4.0667	3.8732	4.3145	4.221	4.1713	3.951	3.5669	3.8947	4.4585	4.0302	4.3252	4.4125	4.2311	4.6	3.2656	4.262	4.0639	4.2755	3.79	3.9793	3.8086
pos_287	metab_286	metab_286	-	-	133.097	0.5188	pos	-	-	-	-	-	-	0.0132	2.4814	2.7981	2.5116	2.7112	2.9031	2.314	2.9627	3.0698	3.1801	3.2467	4.2197	2.8984	2.4041	3.0892	3.2527	3.2908	3.0838	3.1815	3.1324	3.2554	2.9351	2.1849	3.1338	3.1398	2.9071	3.0482	3.012	3.3663	2.6478	2.8742	2.9406	2.8908	3.2889	3.2287	3.1699
pos_288	metab_287	metab_287	-	-	358.998	0.5188	pos	-	-	-	-	-	-	0.0079	3.4815	2.827	3.0244	3.2355	3.8636	2.8796	3.7951	4.1301	3.5804	4.0066	4.7534	3.7427	2.5155	2.7885	3.9769	3.6507	3.9352	3.796	3.8826	4.1276	3.8785	2.8634	3.8964	3.9925	2.6159	3.5841	3.2654	3.9077	2.8447	2.8598	2.7937	2.8307	4.0936	4.0908	4.0726
pos_289	metab_288	metab_288	-	-	362.925	0.5391	pos	-	-	-	-	-	-	0.0053	3.5463	3.6991	2.5999	4.1479	4.5107	3.3578	4.7727	3.153	4.0052	3.7473	4.1229	4.0951	3.606	2.8239	3.1671	2.8132	3.8192	4.7883	3.9838	4.082	3.5954	2.7628	4.0934	4.279	2.6513	3.527	2.8507	3.9113	2.8802	2.7933	2.8291	2.8172	3.2446	3.2236	3.2296
pos_290	metab_289	metab_289	-	-	394.873	0.5391	pos	-	-	-	-	-	-	0.01	4.2862	4.4936	3.2919	4.928	5.6213	4.9366	5.741	4.7821	4.9967	4.8955	5.2982	5.1917	2.7758	3.0491	4.0876	3.3067	5.1538	5.489	4.9646	5.251	4.9929	3.8015	5.2296	5.2928	2.8763	4.3328	3.5845	4.9531	3.1054	3.342	3.0543	3.0423	4.7244	4.6384	4.6932
pos_291	metab_290	metab_290	-	-	320.865	0.5391	pos	-	-	-	-	-	-	0.0096	4.6675	4.895	4.6091	4.7269	4.3262	4.5157	4.3072	4.0564	4.5828	4.3745	3.7359	4.4983	4.8834	4.7798	4.4775	4.6676	4.1907	4.0306	3.9339	3.8423	3.6232	4.5306	4.2803	3.7571	5.2822	4.806	5.0799	4.5349	4.288	5.2023	5.2135	5.1106	4.3614	4.2754	4.2604
pos_292	metab_291	metab_291	-	-	326.886	0.5391	pos	-	-	-	-	-	-	0.0045	4.2958	4.4217	3.4818	4.6335	5.1822	4.6099	5.2373	4.5702	4.7361	4.6837	4.9077	4.852	3.2722	3.3915	4.0501	3.6547	4.8236	5.0418	4.6693	4.8928	4.6841	3.7434	4.8975	4.8464	3.2186	4.2361	3.7502	4.7456	3.4478	3.3609	3.3967	3.5693	4.4943	4.4718	4.4788
pos_293	metab_292	metab_292	-	-	322.863	0.5391	pos	-	-	-	-	-	-	0.0116	4.3439	4.4999	4.2857	4.2499	3.3884	3.9746	2.9459	3.2087	4.1905	3.8344	2.5504	3.9613	4.5209	4.4317	3.9777	4.3068	3.5371	2.4754	2.5541	2.7775	2.5358	4.1253	3.7791	2.5516	4.8482	4.4058	4.6755	4.1019	4.0152	4.8017	4.8526	4.7188	3.7747	3.7336	3.6672
pos_294	metab_293	metab_293	-	-	680.703	0.5584	pos	-	-	-	-	-	-	0.0048	5.2486	4.8357	4.9634	4.8043	5.1076	4.753	4.856	4.9501	5.1318	5.158	4.5307	5.065	4.9891	3.9944	4.6575	4.7962	5.0197	4.3651	4.3541	4.7009	4.6348	4.3987	5.0943	4.375	4.4182	4.6296	4.6988	5.0931	4.202	4.8445	4.6374	4.7725	4.8303	4.818	4.8376
pos_295	metab_294	metab_294	-	-	556.775	0.5391	pos	-	-	-	-	-	-	0.0159	3.6588	4.2616	3.8528	4.258	4.2756	4.1644	4.3495	3.5999	3.994	3.5959	3.6846	4.1131	3.8466	3.6484	3.6901	3.94	4.0532	4.128	3.3366	3.7178	3.6127	3.8343	3.8896	3.9593	4.3242	4.2013	4.3791	3.6484	3.3914	4.5342	4.4931	4.4861	3.7317	3.635	3.794
pos_296	metab_295	metab_295	-	-	683.799	0.5391	pos	-	-	-	-	-	-	0.0162	4.0756	4.3323	3.7198	4.3376	4.7798	3.9968	4.8733	3.1996	4.1896	3.9617	4.2332	4.3726	3.446	3.2966	3.7334	3.799	4.0852	4.5487	3.9083	4.2511	3.9479	3.9308	4.2257	4.3867	3.327	4.2898	4.3155	4.0581	3.3529	4.3453	4.2908	4.2795	3.5772	3.5839	3.6169
pos_298	metab_297	metab_297	-	-	696.677	0.5584	pos	-	-	-	-	-	-	0.0084	5.2145	4.7032	5.2444	3.9825	4.4481	3.8309	4.2943	4.7682	4.6052	4.8187	4.6458	4.1496	5.3053	4.7305	4.5461	4.9125	4.6029	4.2533	4.5039	4.7059	4.6472	4.3457	4.4611	4.2868	5.0737	4.2826	4.767	4.8435	4.8726	5.0707	4.9598	4.9594	4.7173	4.7067	4.6761
pos_299	metab_298	metab_298	-	-	746.691	0.5391	pos	-	-	-	-	-	-	0.0054	5.3241	5.0668	4.9026	4.9661	5.0155	5.0616	4.5403	5.0798	5.3529	5.3435	4.3677	5.2191	4.8595	3.2178	4.8794	4.7867	5.1341	4.1677	4.3197	4.6633	4.706	4.5623	5.167	4.2124	4.0309	4.882	4.8909	5.3321	3.2586	4.9327	4.7052	4.7764	5.004	5.0381	4.9615
pos_300	metab_299	metab_299	-	-	932.585	0.5584	pos	-	-	-	-	-	-	0.0066	5.3768	4.5004	5.192	4.2736	4.664	4.4679	4.0963	4.7728	5.0125	5.0806	3.732	4.9345	5.2755	4.1315	4.4966	4.8576	4.8216	3.5506	3.8058	4.2489	4.3513	4.1703	4.8819	3.9967	4.639	4.4895	4.7455	4.8314	4.3006	4.9982	4.7945	4.7154	4.6719	4.6319	4.5866
pos_303	metab_302	metab_302	-	-	700.635	0.5584	pos	-	-	-	-	-	-	0.0152	2.7628	4.5534	4.3384	2.609	2.6844	2.6218	2.76	4.653	2.7573	3.9903	3.601	2.6637	2.6909	4.8733	4.6771	4.8146	3.6141	3.1438	3.8027	3.8406	4.1438	4.2277	3.7909	2.9638	2.7914	4.0306	4.8316	4.4273	4.8758	5.1223	5.0668	5.1245	4.4912	4.4053	4.5592
pos_304	metab_303	metab_303	-	-	241.105	0.5766	pos	-	-	-	-	-	-	0.0027	4.9388	4.846	4.9672	4.7002	4.7471	4.7577	4.6488	4.655	4.6741	4.9045	4.5235	4.898	4.8394	4.6441	4.6307	4.6994	4.6661	4.4636	4.6524	4.6961	4.6255	4.6049	5.0941	4.634	4.7483	4.4549	4.6687	4.6753	4.4872	4.5508	4.6015	4.6226	4.646	4.6736	4.6738
pos_305	metab_304	metab_304	-	-	134.117	0.5949	pos	-	-	-	-	-	-	0.0033	4.3894	3.8275	4.2082	4.1906	4.4346	4.2803	4.6206	4.2623	4.4498	4.25	4.2884	4.3568	4.2503	4.5424	4.1743	4.9352	4.0672	3.9581	4.1324	4.0419	3.9969	4.092	4.1671	3.9367	4.2681	4.6654	4.1116	4.394	4.4078	4.3409	4.3244	4.3399	4.4843	4.4912	4.5239
pos_306	metab_305	metab_305	-	-	212.851	0.5766	pos	-	-	-	-	-	-	0.0042	4.8163	3.9367	5.2586	2.9085	5.4928	2.9213	5.024	5.4023	5.4877	5.5004	5.6743	4.1902	4.7612	5.8582	5.7957	5.783	5.2307	4.5687	5.5473	5.5832	5.5515	5.7361	5.146	5.6564	4.3829	5.5487	4.6295	5.1709	5.8773	5.3745	5.6482	5.4875	5.583	5.616	5.6489
pos_307	metab_306	metab_306	-	-	684.661	0.5584	pos	-	-	-	-	-	-	0.0131	2.9817	4.8666	2.9589	2.8278	4.0839	2.8406	4.6659	4.971	2.9762	4.559	4.8946	2.8826	2.9098	3.1832	4.8139	4.5403	4.6325	4.6449	4.2497	4.9133	4.8808	4.3273	4.538	4.5157	3.0104	4.23	4.718	5.0374	4.0356	4.7546	4.5516	4.7729	4.8575	4.8071	4.9383
pos_308	Creatine	metab_307	HMDB0000064	C00300	114.066	0.5949	pos	M+H-H2O, M+H	C4H9N3O2	71.6	-	-1.27129	57-00-1	0.0037	7.3927	7.4662	7.3994	7.3132	7.3158	7.2159	7.3542	7.4242	7.3581	7.4502	7.4132	7.4285	7.3842	7.4637	7.4724	7.4648	7.4782	7.4615	7.4316	7.5113	7.4843	7.6458	7.4602	7.5014	7.291	7.3408	7.3719	7.1077	7.3155	7.292	7.31	7.2834	7.3486	7.3928	7.394
pos_309	metab_308	metab_308	-	-	129.065	0.5949	pos	-	-	-	-	-	-	0.0039	4.9906	4.7202	4.74	5.0454	4.6918	4.5656	4.7203	4.7423	4.6972	5.1927	4.8026	4.7132	4.783	5.3844	5.271	5.3861	4.7567	4.7703	4.7479	4.7549	4.7474	4.9188	4.8588	4.7689	4.9756	4.6179	4.6217	4.4466	4.6115	4.6382	4.6575	4.5945	4.9584	4.9748	4.97
pos_310	metab_309	metab_309	-	-	138.054	0.6126	pos	-	-	-	-	-	-	0.0017	6.1369	6.1325	6.3363	6.0713	6.2557	5.9127	6.1754	6.1525	6.1058	6.1552	5.9563	6.1668	6.4629	6.2458	6.1337	6.2565	6.111	6.0053	6.0563	6.1827	6.1634	6.2422	6.169	6.0904	6.2693	6.2401	6.1518	6.1461	6.1178	6.2084	6.1822	6.1952	6.1953	6.2008	6.2134
pos_314	metab_313	metab_313	-	-	72.0812	0.6126	pos	-	-	-	-	-	-	0.0062	4.588	4.7571	4.6445	4.7638	4.6135	4.6896	4.615	4.6412	4.7654	4.6014	4.5458	4.7965	4.8401	4.6439	4.6349	4.6646	4.6629	4.849	4.6862	4.7784	4.7468	4.8563	4.6535	4.7871	4.6828	4.6332	4.6139	4.6461	4.3528	4.6505	4.6008	4.5785	4.639	4.6388	4.6669
pos_315	metab_314	metab_314	-	-	167.092	0.6126	pos	-	-	-	-	-	-	0.0025	4.9425	4.9533	4.9461	4.676	4.8978	4.8111	4.9855	4.9501	4.7857	4.8042	4.8701	4.8613	4.8739	4.9044	4.8139	4.8849	4.9412	4.8366	4.8975	4.9152	4.839	5.0603	4.8685	4.8597	4.8429	4.8345	5.0151	4.385	4.8926	4.7497	4.7652	4.7807	4.8558	4.8729	4.8909
pos_316	metab_315	metab_315	-	-	212.102	0.6126	pos	-	-	-	-	-	-	0.0036	5.3702	5.0835	5.2569	5.0624	5.2859	5.1868	5.1289	5.1827	5.3495	5.306	4.8967	5.2718	5.2081	5.1931	5.0821	5.18	5.269	5.077	5.1123	5.125	4.9341	5.2195	5.2982	4.9189	5.1454	4.9087	5.1448	4.7995	5.12	5.0364	5.0455	5.0635	5.0735	5.1109	5.1036
pos_317	metab_316	metab_316	-	-	261.107	0.6126	pos	-	-	-	-	-	-	0.0106	4.4437	4.1987	4.228	4.4887	4.2633	4.546	4.2836	4.1916	4.4937	4.5176	4.0928	4.5829	4.1642	3.7277	3.786	3.8705	4.3563	4.2348	4.2082	3.896	4.3777	3.8986	4.4734	3.9151	4.6195	3.785	3.9396	4.1352	3.6867	4.0122	3.9172	3.4198	4.0208	4.094	4.1052
pos_318	metab_317	metab_317	-	-	143.081	0.6126	pos	-	-	-	-	-	-	0.0011	5.3024	5.1381	5.1619	5.0524	5.1534	4.995	5.117	5.1823	5.0832	5.1404	5.271	5.1883	5.0903	5.0789	5.0428	5.0685	5.2167	5.1684	5.0469	5.0392	5.0615	5.0036	5.1316	5.0015	5.3054	5.1344	5.0262	5.1475	5.1572	5.0722	5.0842	5.065	5.079	5.0932	5.0872
pos_319	metab_318	metab_318	-	-	176.893	0.6126	pos	-	-	-	-	-	-	0.0203	3.5062	3.0652	4.0346	2.8022	4.0181	2.8151	3.636	3.7423	4.1588	4.0416	4.3694	3.426	3.8727	4.5255	4.414	4.4299	3.2437	3.0261	3.7699	4.0242	3.8176	4.0463	3.8498	3.8967	3.443	4.1866	3.1844	3.9758	4.4638	4.0792	4.2921	4.1129	4.1291	3.976	4.1992
pos_320	metab_319	metab_319	-	-	144.101	0.6126	pos	-	-	-	-	-	-	0.0018	6.6699	6.7549	6.6295	6.4253	6.6595	6.1965	6.654	6.7495	6.5025	6.6821	6.6921	6.4964	6.5662	6.7007	6.6925	6.7271	6.7852	6.7882	6.7543	6.8822	6.7147	6.7834	6.7353	6.7474	6.9512	6.8999	6.9501	7.0439	7.0768	6.965	6.9942	6.9976	6.837	6.8614	6.8617
pos_321	Guanine	metab_320	HMDB0000132	C00242	152.056	0.6304	pos	M+H, M+K	C5H5N5O	78.8	-	-3.64806	73-40-5	0.0028	5.6073	5.3342	5.2769	5.2471	5.3846	5.2259	4.7669	5.3806	5.6812	5.6382	5.3696	5.3359	4.8408	4.7878	5.2599	5.0475	5.557	5.5157	5.4837	5.4242	5.0656	5.7112	5.6269	5.2549	5.2444	5.2685	5.2486	5.5043	5.4878	5.3502	5.4044	5.3875	5.3831	5.4255	5.4075
pos_322	metab_321	metab_321	-	-	203.138	0.6304	pos	-	-	-	-	-	-	0.0015	5.6032	5.7589	5.7497	5.5622	5.6042	5.5401	5.7638	5.7412	5.7916	5.8792	5.5868	5.8757	5.6962	5.6953	5.651	5.7331	5.7099	5.5619	5.7291	5.8132	5.6269	5.8752	5.8009	5.6119	5.8792	5.6089	5.6649	5.7801	5.5711	5.7454	5.7432	5.7182	5.7392	5.732	5.7188
pos_323	metab_322	metab_322	-	-	129.102	0.6304	pos	-	-	-	-	-	-	0.0052	4.6774	4.4658	4.5415	4.1471	4.4553	4.4455	4.5665	4.4336	4.4249	4.5401	4.4665	4.3904	4.3454	4.3844	4.4294	4.3924	4.3546	4.333	4.308	4.4502	4.4945	4.5055	4.3428	4.3891	4.7072	4.3661	4.2639	4.3946	4.3904	4.2723	4.3132	4.2422	4.3694	4.4187	4.4262
pos_324	metab_323	metab_323	-	-	150.077	0.6304	pos	-	-	-	-	-	-	0.0128	4.4398	4.5722	4.478	4.2739	4.2545	4.4001	4.4988	4.4403	4.5246	4.3644	4.5238	4.3699	4.3947	4.5209	4.5664	4.61	4.3754	4.5524	4.4458	4.6195	4.4443	4.9576	4.5027	4.3981	4.5948	4.6468	4.6826	4.6585	4.8497	4.5894	4.5951	4.6077	4.6434	4.519	4.6533
pos_325	3,4,5-trihydroxy-6-{[3-(3-hydroxyphenyl)propanoyl]oxy}oxane-2-carboxylic acid	metab_324	HMDB0124983	-	343.106	0.6492	pos	M+H, M+K	C15H18O9	-	56.9	9.9162	-	0.0068	3.3348	3.9242	3.4659	2.0505	4.2856	2.1929	2.7242	4.0745	2.3981	3.751	2.5703	3.7541	3.7131	6.0508	5.6989	5.816	4.2599	3.7633	4.1482	4.0296	3.1802	6.3807	3.8169	3.1422	3.4362	3.7782	3.8047	3.2394	3.9886	3.4543	3.779	3.7102	5.4175	5.4873	5.4831
pos_326	metab_325	metab_325	-	-	196.071	0.6492	pos	-	-	-	-	-	-	0.0038	5.0255	4.7696	4.8959	4.6615	4.8022	4.6241	4.8717	4.8475	4.9188	4.9678	4.6778	4.7647	4.7981	4.9119	4.825	4.8922	4.9461	4.6732	4.8816	4.7067	4.7427	4.7359	4.8858	4.6211	4.9451	4.7774	4.8656	4.8854	4.8428	4.956	4.9185	4.9246	4.867	4.9132	4.8788
pos_327	metab_326	metab_326	-	-	346.123	0.6492	pos	-	-	-	-	-	-	0.0057	4.5496	4.7266	4.64	4.268	4.5009	4.0739	4.6495	4.7738	4.8298	4.8048	4.6864	4.6002	4.4942	4.7697	4.8613	4.7452	4.7903	4.7495	4.7614	4.8298	4.9131	4.6592	4.7426	4.7567	4.6572	4.8045	4.7952	4.6219	4.7326	4.7615	4.7357	4.7218	4.8034	4.8678	4.8682
pos_328	metab_327	metab_327	-	-	302.086	0.6492	pos	-	-	-	-	-	-	0.0049	4.7976	4.762	4.5128	4.5313	4.4747	4.4769	4.6525	4.589	4.5538	4.4231	4.6797	4.5045	4.497	4.764	4.6587	4.6226	4.5866	4.3382	4.7221	4.317	4.5423	4.4987	4.6328	4.44	4.5642	4.7177	4.8058	4.4504	4.629	4.5848	4.6921	4.6273	4.6367	4.677	4.6732
pos_329	metab_328	metab_328	-	-	183.068	0.667	pos	-	-	-	-	-	-	0.0119	4.3481	4.3538	4.4279	4.3043	4.3175	4.2193	4.4119	4.2967	4.3157	4.3668	4.1585	4.3686	4.4838	4.4167	4.261	4.3459	4.2797	4.0854	4.2525	4.2868	4.2877	3.8404	4.3474	4.17	4.4141	4.3569	4.4188	4.1844	4.124	4.4318	4.3768	4.403	4.2708	4.4123	4.3237
pos_330	metab_329	metab_329	-	-	205.118	0.667	pos	-	-	-	-	-	-	0.0024	4.7525	4.7842	4.6365	4.4466	4.5412	4.3654	4.6394	4.7188	4.599	4.4359	4.4791	4.5119	4.4627	4.512	4.5377	4.544	4.5587	4.4352	4.6328	4.5368	4.5644	4.5359	4.5916	4.4276	4.787	4.9123	4.8123	4.8714	5.2478	4.8404	4.8583	4.8463	4.6607	4.6814	4.6573
pos_331	metab_330	metab_330	-	-	230.113	0.6492	pos	-	-	-	-	-	-	0.0042	4.7406	4.8168	4.854	4.9203	4.8228	4.3517	4.8256	4.7869	4.6652	4.8087	4.7954	4.9005	4.928	4.9951	4.9578	4.9406	4.854	4.6425	4.8478	4.9005	4.9173	5.0937	4.8059	4.8529	4.7488	5.051	4.9658	4.6427	5.0776	4.9292	4.91	4.9023	4.935	4.9287	4.9147
pos_332	metab_331	metab_331	-	-	370.097	0.6492	pos	-	-	-	-	-	-	0.0203	4.0817	4.0225	4.1528	3.8115	4.1287	3.6226	4.22	4.1055	4.4647	4.442	3.6355	4.2123	4.0362	3.6037	3.8897	3.9721	4.3804	3.5308	3.9102	4.0485	4.1914	3.3892	4.456	3.3951	4.3076	4.1044	4.1621	3.9873	3.9791	4.3649	4.3288	4.3409	3.9872	4.1455	4.2166
pos_333	metab_332	metab_332	-	-	186.087	0.6492	pos	-	-	-	-	-	-	0.0137	3.5746	3.6615	3.5166	3.3383	3.4359	3.31	3.3956	3.3379	3.4155	3.509	3.8246	3.8036	3.7959	3.9421	4.4531	4.1469	3.4992	3.716	3.4279	3.2055	3.3811	4.2557	3.3183	3.4111	3.4354	3.8732	3.9396	3.182	3.7175	3.6702	3.6217	3.5706	4.0136	3.9726	3.8738
pos_335	metab_334	metab_334	-	-	158.117	0.667	pos	-	-	-	-	-	-	0.0018	6.0481	6.2169	6.0588	5.8433	6.1032	5.5021	5.9259	6.2134	5.6132	6.101	6.3701	5.7812	5.8584	6.3319	6.2832	6.2745	6.3255	6.452	6.2393	6.3912	6.0026	6.4416	6.1007	6.125	6.2721	6.0636	6.0841	6.2399	6.2724	6.1625	6.2246	6.1848	6.2279	6.2341	6.2551
pos_336	Beta-Alanopine	metab_335	-	C02207	162.075	0.667	pos	M+H, M+K	C6H11NO4	51.4	-	-4.09894	-	0.0032	5.3652	4.7284	5.2477	4.4578	5.2304	5.332	5.1953	4.9722	4.6507	4.9327	4.9478	4.6986	4.7046	4.9126	4.7532	4.8973	4.9326	4.9106	4.6398	4.9059	4.846	4.6645	4.7992	4.7884	5.933	5.0605	5.2679	6.2861	6.4598	5.5531	5.6644	5.5704	5.2273	5.2181	5.2617
pos_337	metab_336	metab_336	-	-	163.079	0.667	pos	-	-	-	-	-	-	0.0054	4.1005	3.9639	4.0268	3.2966	3.9202	4.1715	3.9632	3.8232	3.0996	3.5906	4.5738	3.3862	3.4357	4.0334	4.0032	3.9555	3.7815	4.6548	3.7279	4.3197	4.0975	4.0779	3.5775	4.1956	4.8121	4.5124	4.2107	5.1339	5.3358	4.4452	4.5484	4.4895	4.1546	4.1274	4.1904
pos_338	metab_337	metab_337	-	-	248.112	0.667	pos	-	-	-	-	-	-	0.0033	4.6943	4.4235	4.6688	4.5851	4.6416	4.5285	4.6842	4.553	4.6001	4.6578	4.2921	4.7991	4.7419	4.6559	4.6498	4.7271	4.5715	4.5615	4.6113	4.5785	4.4964	4.6461	4.5843	4.4532	4.5925	4.6667	4.8284	4.419	4.6146	4.716	4.7349	4.7455	4.6862	4.6971	4.6546
pos_339	metab_338	metab_338	-	-	406.169	0.667	pos	-	-	-	-	-	-	0.0038	4.7727	4.7089	4.4226	4.2516	4.0183	3.9283	4.5997	4.5331	4.3814	4.3887	3.4065	4.4074	4.4409	4.0905	4.5518	3.8593	4.5153	3.3313	4.0334	4.3275	4.4917	3.4018	4.0618	4.2415	4.9845	3.7523	4.3589	4.9121	4.9473	4.59	4.7292	4.8065	4.7313	4.7777	4.772
pos_341	metab_340	metab_340	-	-	115.05	0.667	pos	-	-	-	-	-	-	0.0057	4.5945	4.6335	4.6395	4.3639	4.5199	4.5028	4.577	4.6828	4.733	4.6403	4.7218	4.5874	4.5161	4.6147	4.5381	4.6242	4.5318	4.5827	4.6125	4.706	4.664	4.1885	4.6676	4.5836	4.6453	4.5316	4.7269	4.4739	4.4213	4.5926	4.5888	4.5971	4.6322	4.6246	4.5675
pos_342	metab_341	metab_341	-	-	146.117	0.667	pos	-	-	-	-	-	-	0.0011	5.3426	5.5477	5.4224	5.2478	6.0178	5.0532	5.4838	5.5459	5.585	5.4202	5.8308	5.4117	5.2801	5.2847	5.4222	5.3276	5.6591	5.3926	5.4116	5.5064	5.9445	5.1955	5.2502	5.7846	5.9282	5.3024	5.3034	5.4641	6.0073	5.7046	5.8143	5.7075	5.5612	5.5649	5.5761
pos_343	metab_342	metab_342	-	-	191.044	0.6492	pos	-	-	-	-	-	-	0.019	4.0462	4.0745	4.1727	3.9955	4.0281	4.0384	4.1741	4.0612	4.3177	4.1648	3.791	4.1953	4.1517	3.6803	3.6869	3.8852	4.0581	3.7379	3.5845	3.9254	3.9711	3.1269	4.1981	3.5645	4.3596	3.9821	3.8662	4.1596	3.7841	4.2668	4.1868	4.1694	3.9138	4.1104	3.9976
pos_344	metab_343	metab_343	-	-	179.044	0.667	pos	-	-	-	-	-	-	0.0066	4.659	4.6013	4.6844	4.4454	4.5646	4.3477	4.6125	4.5496	4.7507	4.7128	4.2925	4.6295	4.6127	4.3745	4.2072	4.4048	4.5884	4.286	4.295	4.3912	4.462	3.8918	4.6337	4.1626	4.8273	4.4533	4.4232	4.676	4.3686	4.701	4.7043	4.6711	4.5732	4.6068	4.523
pos_345	metab_344	metab_344	-	-	104.071	0.6852	pos	-	-	-	-	-	-	0.0003	4.4252	4.4445	4.4339	4.4262	4.4213	4.3967	4.4442	4.4309	4.4455	4.3829	4.5702	4.4482	4.4359	4.5461	4.5123	4.5404	4.4222	4.4613	4.4375	4.5425	4.4896	4.554	4.4367	4.5087	4.7072	4.7921	4.7023	4.7614	4.8037	4.7635	4.8011	4.7528	4.5566	4.5569	4.5543
pos_346	metab_345	metab_345	-	-	169.985	0.5949	pos	-	-	-	-	-	-	0.0091	4.1474	4.3828	4.1102	4.703	4.8496	4.7982	5.0544	4.3444	4.5567	4.3686	4.7056	5.0095	4.0332	2.5	3.3085	2.9261	4.5934	5.0424	4.4845	4.7497	4.2039	2.925	4.7371	4.5897	3.9394	3.8262	3.3181	4.6032	2.5562	3.2658	2.5052	2.4933	4.2293	4.1802	4.2535
pos_347	Glycylproline	metab_346	HMDB0000721	-	173.091	0.6492	pos	M+H-H2O, M+H	C7H12N2O3	59	-	-3.78895	704-15-4	0.0022	4.8221	5.2826	4.9261	4.6268	4.8049	4.6113	4.856	5.043	5.0759	5.0864	4.9498	5.0999	4.6903	5.0167	4.9883	4.9931	4.9168	5.0967	5.0471	4.9456	5.0087	4.6249	5.0214	4.9429	4.9725	4.6934	4.7634	4.7565	4.6031	4.7496	4.7735	4.6994	4.946	4.9723	4.9463
pos_348	metab_347	metab_347	-	-	143.118	0.6492	pos	-	-	-	-	-	-	0.0017	5.9565	6.0971	5.9157	5.4554	6.0023	5.3737	5.9976	6.1121	5.852	6.0661	6.1669	5.7351	5.736	5.9376	6.0677	5.9305	6.0567	6.2589	6.1007	6.2699	6.1351	5.4734	5.9546	6.1358	5.6776	6.0541	6.0329	5.8763	6.1726	5.8797	5.9825	5.9603	6.0258	6.0365	6.0102
pos_349	metab_348	metab_348	-	-	381.078	0.5949	pos	-	-	-	-	-	-	0.0055	5.8815	5.0907	5.8686	5.6381	5.062	5.2109	4.5853	5.3869	4.7843	4.7377	4.501	5.4633	5.8211	4.9229	4.707	4.8862	5.762	4.6348	5.1662	5.8269	4.4069	4.5008	5.2477	5.1036	6.1241	5.4135	6.1406	5.73	5.6113	5.6228	5.642	5.6184	5.3378	5.3844	5.42
pos_350	metab_349	metab_349	-	-	175.053	0.6852	pos	-	-	-	-	-	-	0.0136	4.1166	4.3424	4.0582	3.4799	3.9501	3.8909	3.2959	3.6907	3.2364	3.2995	3.7296	3.5016	3.3442	3.9337	3.7584	3.6075	3.8339	3.1278	3.4674	3.8709	3.6475	3.9026	3.3237	3.2042	3.9571	4.123	3.3425	3.5209	3.5685	3.5763	3.6009	3.3271	3.8012	3.7795	3.714
pos_351	metab_350	metab_350	-	-	115.069	0.5949	pos	-	-	-	-	-	-	0.0037	6.0989	6.1716	6.1158	5.9935	6.0622	5.9246	6.0789	6.1435	6.0589	6.1482	6.1294	6.119	6.0775	6.2146	6.2038	6.2107	6.1747	6.1737	6.1281	6.2114	6.189	6.3287	6.1573	6.2065	6.0088	6.0516	6.0884	5.8368	6.0607	5.9998	6.0327	5.9987	6.0737	6.1147	6.1098
pos_353	metab_352	metab_352	-	-	204.133	0.7051	pos	-	-	-	-	-	-	0.0054	5.1896	5.2697	5.2719	5.1436	5.3156	4.7458	5.3611	5.3559	5.2643	5.3109	5.413	5.2035	5.306	5.505	5.4468	5.4832	5.4612	5.2477	5.3787	5.4012	5.2627	5.3733	5.3708	5.2729	5.2701	5.6348	5.4869	5.3634	5.6706	5.5462	5.5634	5.602	5.4396	5.4925	5.4248
pos_354	metab_353	metab_353	-	-	158.128	0.7051	pos	-	-	-	-	-	-	0.0072	4.9341	4.5216	5.0266	3.3233	4.6174	4.0482	4.8376	4.9416	3.841	4.4591	4.9968	3.8539	3.1657	3.7036	4.3824	3.9834	4.6326	4.6861	4.3338	4.8351	4.692	4.2483	4.6214	4.7279	4.537	3.9799	4.5309	5.055	5.3201	4.5616	4.6412	4.5908	4.653	4.7195	4.6442
pos_355	metab_354	metab_354	-	-	231.133	0.7051	pos	-	-	-	-	-	-	0.0028	5.1584	4.8388	5.2524	4.2871	5.2114	4.8079	5.2869	4.935	4.6729	4.9056	4.9012	4.6806	4.5978	5.1763	5.0988	5.1029	4.8388	4.8294	4.6078	5.0591	4.9942	4.8434	4.706	4.9935	4.7715	4.7534	4.661	4.8194	5.0202	4.6628	4.7755	4.6956	4.8797	4.8716	4.8527
pos_356	metab_355	metab_355	-	-	137.026	0.7051	pos	-	-	-	-	-	-	0.0069	3.9483	3.9811	3.9135	3.6428	3.8829	3.2812	3.8378	4.1655	3.9717	3.8025	4.2015	3.8345	3.738	4.3062	4.2726	4.2967	4.1606	4.2177	4.2452	4.3489	3.9738	3.8736	3.8255	4.0843	3.8275	4.1916	4.2528	4.2089	4.2332	3.9797	4.1452	4.1969	4.2788	4.2352	4.2236
pos_357	metab_356	metab_356	-	-	210.075	0.7248	pos	-	-	-	-	-	-	0.0011	4.5228	4.6081	4.6806	4.5302	4.5677	4.6191	4.6412	4.6102	4.5071	4.6984	4.5673	4.6114	4.6918	4.7134	4.6857	4.4702	4.5202	4.6372	4.7246	4.6796	4.7098	4.6487	4.703	4.6529	4.5168	4.6509	4.823	4.7045	4.8947	4.8564	4.8548	4.8855	4.7255	4.7103	4.7189
pos_358	metab_357	metab_357	-	-	444.117	0.7248	pos	-	-	-	-	-	-	0.0061	4.9446	4.8355	5.062	4.2403	4.8537	4.3338	5.1092	4.8555	4.6477	4.9195	4.8732	4.4826	4.4142	4.5944	4.757	4.6308	4.8182	5.0859	4.7278	5.1333	4.7968	4.8215	4.849	5.0108	4.8753	4.8212	4.8046	4.7101	4.9238	4.8618	4.8769	4.7487	4.7429	4.7015	4.7782
pos_359	metab_358	metab_358	-	-	185.091	0.7248	pos	-	-	-	-	-	-	0.0037	4.3834	4.4625	4.412	4.1968	4.3691	4.1521	4.4057	4.4439	4.3945	4.4044	4.5629	4.4412	4.4326	4.5943	4.6058	4.6183	4.4156	4.3456	4.4129	4.4873	4.4755	4.3695	4.4677	4.4331	4.4129	4.471	4.4384	4.3797	4.6729	4.4245	4.4942	4.4417	4.5067	4.5084	4.4704
pos_360	metab_359	metab_359	-	-	208.063	0.7248	pos	-	-	-	-	-	-	0.0028	4.37	4.5554	4.3289	4.222	4.3039	3.8814	4.3671	4.4011	4.5431	4.3175	4.566	4.4444	4.3806	4.7019	4.5367	4.6297	4.2752	4.3753	4.4712	4.3935	4.4171	4.5301	4.2578	4.4269	4.4274	4.772	4.639	4.5111	4.5505	4.6478	4.6797	4.6737	4.5691	4.6016	4.5917
pos_361	metab_360	metab_360	-	-	210.086	0.7248	pos	-	-	-	-	-	-	0.0101	4.2819	4.2611	4.4206	3.7689	4.3943	3.8807	4.3356	4.2526	4.1984	4.2426	4.2788	4.0799	4.2351	4.1742	4.4941	4.0713	4.1224	4.0646	4.2882	4.2149	4.3133	4.4271	4.2351	4.2283	4.4145	3.989	4.4382	4.2333	4.4539	4.4417	4.5539	4.4744	4.3709	4.4449	4.4646
pos_362	metab_361	metab_361	-	-	371.101	0.7248	pos	-	-	-	-	-	-	0.0098	3.6739	4.0066	3.7999	3.7771	3.7102	3.5805	3.8095	3.6164	4.0058	3.7949	3.7893	3.8798	3.7978	4.8944	4.5148	4.6779	3.654	3.7382	3.8892	3.815	3.9003	5.2505	3.7937	3.9391	3.5587	4.1773	4.0149	3.7763	3.633	3.8461	3.8811	3.9939	4.3086	4.4107	4.3117
pos_363	metab_362	metab_362	-	-	270.155	0.7248	pos	-	-	-	-	-	-	0.0093	4.5418	4.5682	4.4632	3.7313	4.3416	3.8181	4.4524	4.468	4.427	4.3142	4.4583	4.1375	4.3627	4.6798	4.459	4.5474	4.0982	4.1621	4.3498	4.3192	4.4735	4.7035	4.3541	4.4296	4.4186	4.7807	4.7087	4.3549	4.778	4.6017	4.6862	4.6323	4.402	4.4729	4.5108
pos_365	metab_364	metab_364	-	-	212.091	0.7248	pos	-	-	-	-	-	-	0.007	4.418	4.403	4.2958	4.0149	4.3405	3.9197	4.3699	4.3786	4.3699	4.335	4.4873	4.2341	4.2671	4.3523	4.3619	4.3177	4.2063	4.277	4.3226	4.1905	4.3313	4.5009	4.2632	4.2838	4.2439	4.3614	4.4758	4.349	4.632	4.5561	4.5825	4.5873	4.41	4.442	4.4239
pos_366	metab_365	metab_365	-	-	155.117	0.7248	pos	-	-	-	-	-	-	0.0106	3.6703	3.4448	3.6752	3.2747	3.6406	3.4519	3.6467	3.4091	3.5601	3.8369	4.0036	4.0758	3.9733	4.9651	4.5837	4.8027	2.6572	3.1475	3.1873	3.0885	3.265	3.837	3.1524	3.4394	3.6635	3.9245	3.7812	3.7326	3.8566	3.7835	3.934	3.893	4.1206	4.2151	4.1269
pos_367	metab_366	metab_366	-	-	261.053	0.7248	pos	-	-	-	-	-	-	0.0073	3.2816	4.3253	3.8977	3.7883	3.6189	3.7247	4.0589	3.9593	4.1404	3.995	4.2091	3.9765	4.0572	4.6553	4.3649	4.5121	4.153	4.1441	4.3083	4.3275	4.5336	4.224	4.1447	4.4701	3.9704	4.7352	4.4899	3.8665	4.3756	4.4027	4.4146	4.3929	4.2056	4.1997	4.2077
pos_368	metab_367	metab_367	-	-	288.143	0.7248	pos	-	-	-	-	-	-	0.0169	3.6839	3.6051	3.9885	3.6282	3.7042	3.6168	3.7878	3.8033	3.4999	3.6875	3.8051	3.5985	3.7835	3.7152	3.8778	2.9053	3.7106	3.7853	3.7218	3.9238	3.7602	3.9288	3.8381	3.8227	3.77	2.9633	3.9597	3.8785	4.2303	4.087	4.1302	4.053	3.6867	3.6992	3.8318
pos_369	metab_368	metab_368	-	-	384.113	0.7248	pos	-	-	-	-	-	-	0.0078	4.823	5.0813	4.8469	4.3078	4.8436	4.3498	4.9772	4.9799	4.8915	4.9891	5.0304	4.6124	4.5141	4.9526	5.389	4.9022	4.9072	4.9925	5.0453	5.0513	5.1618	5.9222	5.0081	5.0609	5.0005	4.8444	5.154	4.8593	5.1685	5.0999	5.1503	5.0772	5.1717	5.1913	5.1218
pos_370	metab_369	metab_369	-	-	184.096	0.7248	pos	-	-	-	-	-	-	0.0064	4.2813	4.2804	4.3052	3.9812	4.286	4.0051	4.255	4.2817	4.1365	4.2659	4.3045	4.1321	4.2019	4.4156	4.3996	4.4419	4.1873	4.2793	4.3213	4.3735	4.3795	4.5443	4.3341	4.335	4.0858	4.3473	4.3111	4.2543	4.4674	4.3454	4.3405	4.376	4.3311	4.3821	4.3526
pos_371	metab_370	metab_370	-	-	260.123	0.7248	pos	-	-	-	-	-	-	0.0121	3.6418	4.1858	4.1151	3.7683	4.0462	3.412	4.1544	4.0116	3.9485	3.7598	4.1068	3.8825	4.0478	4.0243	3.992	4.1649	4.125	4.0191	4.113	4.2601	4.1743	4.2777	4.0873	4.1749	3.9981	4.365	4.1077	4.0969	4.3802	4.1366	4.2297	4.2326	4.1672	4.2571	4.1838
pos_372	metab_371	metab_371	-	-	142.122	0.7248	pos	-	-	-	-	-	-	0.0098	4.0473	3.9782	4.0954	4.0647	4.1022	4.0854	4.0512	4.0362	4.0904	4.0471	4.1104	4.1814	4.1772	4.6169	4.3083	4.5942	4.0349	4.1099	4.0914	3.9387	4.1263	4.1383	4.037	4.1085	3.9912	4.3956	4.0442	4.0508	4.1868	3.9865	4.0967	4.0183	4.225	4.1619	4.1461
pos_373	metab_372	metab_372	-	-	211.107	0.7248	pos	-	-	-	-	-	-	0.0109	4.6051	4.4236	4.5952	4.1289	4.7814	4.1284	4.7206	4.847	4.459	4.6383	4.9862	4.3398	4.2438	4.4639	4.5434	4.3568	4.6297	5.0211	4.3681	4.7633	4.9331	4.5943	4.7263	4.7438	4.2543	4.1865	4.4538	4.4749	4.5674	4.4412	4.4535	4.4123	4.3081	4.4412	4.3926
pos_374	metab_373	metab_373	-	-	259.128	0.7428	pos	-	-	-	-	-	-	0.0234	3.9518	4.0706	3.9633	3.6697	3.9466	3.7836	4.0447	4.0888	3.905	3.9503	4.1735	3.9762	3.632	4.1931	4.0598	3.8702	4.0134	3.9689	3.7706	4.0241	4.2001	3.745	3.7708	4.073	4.013	4.1507	4.0963	3.9078	4.2824	3.9866	3.9888	3.8982	3.8465	3.8451	3.9582
pos_375	metab_374	metab_374	-	-	219.097	0.7051	pos	-	-	-	-	-	-	0.0051	4.1568	4.479	4.3423	4.0445	4.2003	4.113	4.3231	4.3168	4.315	4.0866	4.2921	4.2216	4.3152	4.654	4.2882	4.5852	4.2254	4.2426	4.371	4.3025	4.4612	4.4158	4.278	4.2937	4.3545	4.8097	4.371	4.2996	4.5066	4.4765	4.5013	4.517	4.4361	4.3905	4.3882
pos_376	metab_375	metab_375	-	-	199.107	0.7248	pos	-	-	-	-	-	-	0.0064	4.5345	4.4985	4.6395	4.2491	4.666	4.3004	4.6006	4.6833	4.6433	4.7016	4.6743	4.5905	4.5713	4.8148	4.7376	4.6439	4.5435	4.7518	4.7427	4.7088	4.5925	4.8373	4.681	4.6848	4.5241	4.6119	4.8036	4.4825	4.7935	4.6976	4.7824	4.7135	4.6244	4.6717	4.6026
pos_377	metab_376	metab_376	-	-	344.096	0.7428	pos	-	-	-	-	-	-	0.0075	4.7818	4.7844	4.8323	4.278	4.8368	4.0143	4.9198	4.7646	4.3291	4.4611	4.938	4.3289	3.8403	4.0951	4.5398	3.8708	4.7828	4.8974	4.8657	4.9725	4.8007	4.7448	4.608	4.7947	4.5767	4.1638	4.5885	4.776	4.8809	4.6587	4.7144	4.7317	4.676	4.7186	4.6655
pos_378	metab_377	metab_377	-	-	259.091	0.7248	pos	-	-	-	-	-	-	0.0033	4.6972	4.8546	4.7862	4.2848	4.6687	4.3882	4.746	4.7554	4.7394	4.7764	4.7586	4.5508	4.6779	4.7169	4.6396	4.77	4.674	4.8462	4.7103	4.8763	5.0128	4.8188	4.8058	4.9239	4.8445	5.0252	4.9396	4.7531	4.8584	4.8666	4.9306	4.8475	4.7927	4.8346	4.8236
pos_379	metab_378	metab_378	-	-	187.071	0.7248	pos	-	-	-	-	-	-	0.0068	4.2274	4.1694	4.2492	4.0091	4.1946	4.0372	4.1673	4.3192	4.2883	4.2439	4.6236	4.1532	4.1589	4.1622	4.2344	4.2488	4.2621	4.3297	4.2545	4.3426	4.2041	3.8806	4.1845	4.1767	4.2535	4.3321	4.2007	4.3014	4.4145	4.2373	4.2365	4.2492	4.3001	4.3348	4.2825
pos_380	metab_379	metab_379	-	-	350.122	0.7248	pos	-	-	-	-	-	-	0.0045	4.8223	5.1201	4.8059	4.5412	4.9416	4.5916	5.0814	4.943	5.0534	4.8728	4.9947	4.7437	4.6559	4.8707	4.7454	4.8289	4.6893	4.5214	4.9982	4.6459	4.9598	3.9858	5.0841	4.9309	4.9799	5.0981	5.2382	4.8398	5.2824	5.1104	5.1769	5.0946	4.8643	4.9211	4.908
pos_381	metab_380	metab_380	-	-	218.974	0.7815	pos	-	-	-	-	-	-	0.0045	5.0998	4.8029	5.0677	5.2423	5.1342	5.1597	5.1094	4.8539	5.063	5.0117	4.4751	5.1637	5.2143	4.2005	4.3307	4.4305	5.0031	4.5167	4.5143	4.7621	4.6677	3.54	5.0215	4.4676	5.1558	3.9517	4.4716	5.0909	3.8668	5.0085	4.7818	4.8941	4.697	4.6459	4.6542
pos_382	metab_381	metab_381	-	-	326.144	0.7248	pos	-	-	-	-	-	-	0.0028	4.9682	5.5303	5.1487	4.7323	4.834	4.62	4.8718	5.1007	5.1866	5.2902	4.8123	5.2746	4.9733	5.0719	5.0566	5.0506	4.8838	5.0909	5.0524	5.0316	5.0889	5.1042	5.2992	5.0837	5.0775	4.9189	5.0934	4.8963	4.968	5.0752	5.0596	4.995	5.0366	5.0637	5.0388
pos_383	metab_382	metab_382	-	-	171.992	0.9855	pos	-	-	-	-	-	-	0.0044	5.113	4.8153	5.079	5.2689	5.1589	5.2814	5.0914	4.9069	5.089	5.0633	4.7832	5.2105	5.2291	4.6247	4.6535	4.7706	5.0215	4.7549	4.7146	4.8783	4.7933	4.4391	5.0588	4.7165	5.1162	4.5642	4.6903	5.0452	4.6948	4.9606	4.8635	4.8992	4.8681	4.8421	4.8161
pos_384	metab_383	metab_383	-	-	170.081	0.7248	pos	-	-	-	-	-	-	0.0021	5.1602	5.164	5.1331	4.8511	5.133	4.8144	5.1373	5.2045	5.1978	5.1527	5.2968	4.9966	5.1362	5.3281	5.2558	5.3017	5.0725	5.0673	5.264	5.1873	5.1693	5.3957	5.1532	5.1777	5.1183	5.4142	5.2872	5.1522	5.3653	5.2639	5.319	5.3119	5.2557	5.284	5.2723
pos_385	metab_384	metab_384	-	-	288.118	0.7248	pos	-	-	-	-	-	-	0.0036	4.6473	4.9164	4.8763	4.1872	4.6891	4.0938	4.7341	4.8464	4.7334	4.9083	4.9311	4.5115	4.596	5.0242	4.8981	4.9705	4.7835	4.966	4.8475	5.0433	5.0593	5.0654	4.8965	5.0542	5.0587	5.139	5.4156	4.863	5.2769	5.1121	5.2231	5.1363	4.9614	5.0051	4.961
pos_386	metab_385	metab_385	-	-	193.108	0.8418	pos	-	-	-	-	-	-	0.009	3.3233	3.9504	3.4538	3.6033	3.1953	3.5545	3.5838	3.1537	3.8313	3.2351	2.885	3.6269	3.6843	3.8575	3.6986	3.7576	3.2045	2.0765	3.8468	3.1475	3.1202	4.0027	3.7256	3.2799	3.9316	4.2031	3.8928	3.6128	3.2619	3.8871	3.9935	3.9751	3.771	3.7796	3.7037
pos_387	metab_386	metab_386	-	-	322.091	0.7248	pos	-	-	-	-	-	-	0.0055	5.3761	5.5006	5.528	5.1073	4.7991	5.329	5.2372	5.4688	5.4285	5.4153	5.288	5.1431	5.235	4.9404	5.1626	4.2557	5.5718	5.0293	5.4422	4.9861	5.4625	2.9886	5.7117	5.3709	4.9532	3.0969	5.1339	5.1766	4.3991	5.0082	4.9669	4.9525	5.1414	5.2074	5.1448
pos_388	N-Acetylglutamine	metab_387	HMDB0006029	-	153.065	0.8835	pos	M+H-2H2O, 2M+ACN+Na	C7H12N2O4	-	58.1	-3.03521	2490-97-3	0.0023	6.0347	5.8943	5.9684	5.402	5.9197	5.3983	5.828	6.0806	5.8731	5.9954	6.1656	5.6102	5.914	6.3879	6.2928	6.412	6.1117	6.1914	6.2286	6.2811	6.2097	6.0209	5.873	6.242	5.9505	6.4185	6.2305	6.1236	6.2043	6.1162	6.1667	6.1761	6.2037	6.2016	6.2162
pos_389	metab_388	metab_388	-	-	188.055	0.8835	pos	-	-	-	-	-	-	0.0038	4.1957	4.2364	4.1327	3.4557	4.0719	3.5069	4.1584	4.2194	4.0527	4.0216	4.367	3.9928	4.225	4.5739	4.3786	4.5854	3.7018	3.7189	4.079	3.9618	3.9944	4.412	3.8563	3.9726	4.5211	4.9447	4.5226	4.5202	4.7811	4.6709	4.7487	4.6677	4.4783	4.485	4.4558
pos_390	metab_389	metab_389	-	-	237.086	0.8835	pos	-	-	-	-	-	-	0.0068	3.6071	3.8655	3.585	3.483	3.5521	3.3939	3.5443	3.7481	3.7364	3.7128	3.8725	3.6105	3.7656	4.3626	4.1352	4.3442	3.7013	3.7645	4.0407	3.7769	3.7461	4.3064	3.6238	3.7911	3.9685	4.7419	4.2894	3.9937	4.3013	4.1746	4.2762	4.2755	4.0838	4.0726	4.1134
pos_391	metab_390	metab_390	-	-	217.118	0.9239	pos	-	-	-	-	-	-	0.0016	5.3835	5.6088	5.6112	4.923	5.557	4.7276	5.4456	5.6584	5.5958	5.5628	5.4925	5.2557	5.5034	5.8308	5.7044	5.8948	5.6904	5.8263	5.8132	5.8211	5.6998	5.5366	5.6611	5.7361	5.5703	5.848	5.6987	5.3107	5.6602	5.6405	5.7004	5.6749	5.7488	5.7454	5.7598
pos_392	metab_391	metab_391	-	-	182.067	0.7051	pos	-	-	-	-	-	-	0.0107	3.8784	4.3784	3.9642	3.6486	3.6106	3.5251	4.094	4.1805	3.8776	4.122	3.9963	3.9843	4.0664	4.4036	4.3236	4.4852	4.2371	4.2149	4.2207	4.2611	4.4139	4.1311	4.2158	4.1935	4.207	4.5161	4.2971	4.1282	4.311	4.3382	4.4045	4.3753	4.3062	4.324	4.3935
pos_393	metab_392	metab_392	-	-	338.086	0.7248	pos	-	-	-	-	-	-	0.0046	5.4488	5.6781	5.5875	5.0399	5.3759	5.1549	5.6653	5.6304	5.5563	5.8083	5.6273	5.2841	5.5375	5.6587	5.6424	5.6531	5.496	5.7873	5.5382	5.708	5.8214	5.2927	5.7725	5.7338	5.4598	5.487	5.4642	5.5086	5.4102	5.5064	5.5194	5.4633	5.5259	5.5905	5.5534
pos_394	metab_393	metab_393	-	-	100.076	0.7248	pos	-	-	-	-	-	-	0.0025	5.1333	4.9429	5.1494	4.6423	5.4781	4.7712	4.9899	5.086	4.8439	5.0909	5.2275	4.8259	4.882	5.0953	5.1526	5.1796	5.1278	5.3361	5.1136	5.1806	5.2427	4.9551	4.963	5.2193	4.8209	5.088	5.1483	4.9432	5.0395	4.939	4.9773	4.9955	5.0981	5.1065	5.1213
pos_395	metab_394	metab_394	-	-	185.128	0.9446	pos	-	-	-	-	-	-	0.0054	3.9631	3.8031	3.9889	3.6147	3.9376	3.5182	3.8381	4.0257	3.7966	3.9092	4.1317	3.7181	3.8266	4.3275	4.2143	4.3581	4.0367	4.2075	4.2215	3.9856	3.9556	4.106	4.0029	4.0898	3.9169	4.2467	4.1969	3.8829	4.1535	3.9957	4.061	4.0487	4.1003	4.1508	4.1394
pos_396	metab_395	metab_395	-	-	257.112	0.7248	pos	-	-	-	-	-	-	0.0008	5.5321	5.6912	5.5733	5.1991	5.5161	5.029	5.5951	5.6455	5.5673	5.7293	5.6872	5.497	5.4982	5.8558	5.768	5.858	5.6603	5.7523	5.773	5.8102	5.7577	5.7256	5.6792	5.7375	5.5377	5.7596	5.6839	5.4674	5.6812	5.6415	5.701	5.6492	5.7347	5.7451	5.7339
pos_397	metab_396	metab_396	-	-	154.049	0.7248	pos	-	-	-	-	-	-	0.0042	5.6658	5.368	5.5749	5.2	5.6115	5.3427	5.4865	5.5932	5.5356	5.6286	5.583	5.3562	5.6182	5.8359	5.653	5.8079	5.587	5.5006	5.5852	5.6417	5.5776	5.3958	5.4794	5.5735	5.5346	5.7067	5.7043	5.6347	5.6341	5.7093	5.7293	5.7278	5.6091	5.672	5.6259
pos_398	N-Acetylmuramate	metab_397	HMDB0060493	C02713	338.086	0.9855	pos	M+CH3OH+H, M+2Na-H	C11H19NO8	-	64.6	0.124123	-	0.0017	5.3925	5.7133	5.4708	4.8818	5.2082	4.8545	5.4802	5.6662	5.5391	5.717	5.681	5.2621	5.454	5.8337	5.8692	5.9087	5.5876	5.9253	5.7402	5.8526	5.909	5.3803	5.6406	5.8798	5.4822	5.9093	5.6098	5.5648	5.6105	5.4953	5.5928	5.5395	5.7319	5.7159	5.741
pos_399	metab_398	metab_398	-	-	221.091	0.9855	pos	-	-	-	-	-	-	0.0027	4.0352	3.8717	3.9481	3.1132	4.1488	2.9932	4.0241	4.4633	4.199	4.3264	4.5145	3.9652	4.3098	5.0792	4.7413	5.0899	4.0381	4.6017	4.7537	4.5838	4.0858	5.0348	4.2032	4.5834	3.6974	5.1155	4.6992	4.195	4.635	4.2464	4.554	4.3961	4.4287	4.4268	4.4082
pos_400	metab_399	metab_399	-	-	215.102	0.9855	pos	-	-	-	-	-	-	0.0026	4.3143	4.6282	4.5946	4.0357	4.5011	3.6293	4.4438	4.5799	4.5578	4.5373	4.4984	4.2931	4.5777	4.7464	4.7049	4.8675	4.6956	4.619	4.8462	4.8193	4.7096	4.6121	4.5175	4.7763	4.7712	5.0279	4.8584	4.6461	4.7148	4.8014	4.8313	4.8125	4.7851	4.7607	4.7873
pos_401	metab_400	metab_400	-	-	153.065	0.7248	pos	-	-	-	-	-	-	0.0046	6.0938	5.8125	6.0534	5.5778	6.0242	5.7441	5.9528	6.045	5.9105	6.0726	6.0392	5.6891	6.0217	6.2976	6.126	6.2523	6.0824	6.0536	6.0825	6.1773	6.1156	5.8642	5.9448	6.1097	5.9556	6.1426	6.1754	6.0623	6.073	6.1403	6.1586	6.155	6.0625	6.137	6.0789
pos_402	metab_401	metab_401	-	-	281.148	1.0059	pos	-	-	-	-	-	-	0.0027	3.2829	3.8465	3.4474	3.1289	3.3832	3.1417	3.4653	3.9151	4.0337	4.0306	4.4525	3.5851	3.9303	4.4939	4.4441	4.5255	3.8024	4.0568	4.1038	4.1073	4.0731	4.1882	3.5627	4.1008	3.4135	4.1854	4.0265	3.7225	4.2073	3.7308	3.9167	3.8817	4.1675	4.139	4.1421
pos_403	metab_402	metab_402	-	-	283.103	1.0266	pos	-	-	-	-	-	-	0.0045	4.7712	4.8883	4.8413	4.5521	4.7787	4.3712	4.874	4.9022	4.9292	4.9804	5.019	4.8025	4.8087	5.0819	5.007	5.1273	4.9338	5.0556	4.9632	5.1001	5.1277	4.4477	4.9354	5.0807	4.8975	5.1825	4.8489	4.8206	4.9368	4.8452	4.8616	4.8365	4.998	4.9493	4.9723
pos_404	metab_403	metab_403	-	-	98.5121	1.0902	pos	-	-	-	-	-	-	0.0045	4.59	4.3188	4.5445	4.757	4.6429	4.7774	4.5617	4.3883	4.5469	4.5193	4.3294	4.6945	4.6937	4.1641	4.1836	4.2808	4.4826	4.2635	4.2133	4.3083	4.2767	3.9421	4.5367	4.2048	4.6192	4.1645	4.2214	4.5267	4.2891	4.4919	4.3908	4.4168	4.3853	4.3717	4.3371
pos_405	metab_404	metab_404	-	-	183.112	1.0059	pos	-	-	-	-	-	-	0.003	4.2301	4.3323	4.3077	4.0035	4.207	4.0634	4.2091	4.4109	4.2509	4.4489	4.4309	4.192	4.2942	4.7376	4.7011	4.8112	4.2417	4.3777	4.397	4.5401	4.4439	4.9499	4.3516	4.4612	4.526	4.6706	4.4477	4.4657	4.5246	4.4209	4.5004	4.4327	4.5785	4.5588	4.5964
pos_406	metab_405	metab_405	-	-	174.123	0.7248	pos	-	-	-	-	-	-	0.0038	5.5952	5.8759	5.4553	5.213	5.7855	4.9956	5.7272	5.6698	5.373	5.8487	5.707	5.583	5.3149	5.7673	5.7381	5.7805	5.6816	5.7928	5.7104	5.6149	5.9502	5.8836	5.863	5.8778	5.8202	6.1523	5.8694	5.56	6.0466	5.9339	6.0029	5.9338	5.8077	5.7942	5.8396
pos_407	metab_406	metab_406	-	-	241.154	0.7051	pos	-	-	-	-	-	-	0.0022	6.2503	6.5108	6.2918	5.91	6.1639	5.7153	6.3683	6.5158	6.387	6.4276	6.5521	6.1384	6.0788	6.5598	6.5615	6.5547	6.4987	6.5765	6.5988	6.6402	6.4717	6.6881	6.3778	6.5248	6.4123	6.5826	6.5172	6.4619	6.5988	6.4129	6.5054	6.4644	6.5079	6.5462	6.5208
pos_408	metab_407	metab_407	-	-	229.154	0.7248	pos	-	-	-	-	-	-	0.002	6.7736	7.0318	6.8381	6.4312	6.7726	6.2966	6.9099	6.9927	6.8984	6.9865	7.048	6.6809	6.6186	7.0306	7.036	7.0396	7.0282	7.0588	6.9603	7.1182	7.0646	7.1691	6.905	7.0534	7.0948	7.116	7.0604	6.7238	7.189	7.0259	7.1298	7.0401	7.0033	7.0372	7.0039
pos_409	metab_408	metab_408	-	-	139.982	1.0484	pos	-	-	-	-	-	-	0.0043	4.8144	4.54	4.7801	4.988	4.8781	4.9778	4.8023	4.6219	4.7952	4.7719	4.5731	4.9264	4.929	4.4553	4.4815	4.5483	4.7234	4.4732	4.4313	4.5433	4.4847	4.1352	4.7546	4.4083	4.885	4.546	4.6003	4.8204	4.5901	4.7828	4.7056	4.719	4.6459	4.6106	4.606
pos_410	metab_409	metab_409	-	-	324.096	1.0266	pos	-	-	-	-	-	-	0.0082	3.9661	4.3089	4.1272	3.5032	3.6434	3.2378	3.8722	4.2349	4.0095	4.0558	4.2069	3.6176	3.8606	4.0949	4.1587	4.2287	4.385	3.9906	4.4844	4.0831	4.3978	3.7735	4.2788	4.4288	3.8185	4.4592	4.1522	4.0549	3.9578	4.0323	3.9746	4.0106	4.2147	4.1675	4.1992
pos_411	metab_410	metab_410	-	-	219.053	1.0266	pos	-	-	-	-	-	-	0.0065	0.1482	2.3721	2.4759	1.8812	2.3176	0.0105	2.1043	2.477	3.6669	4.1143	4.3711	4.3894	4.4492	4.692	4.5274	4.7317	2.4427	2.7278	2.0698	2.3621	2.3309	3.4239	2.0098	2.2829	2.4191	2.414	0.0241	2.2668	2.7725	2.5493	2.3558	2.593	4.143	4.0779	4.1409
pos_412	metab_411	metab_411	-	-	165.054	0.7051	pos	-	-	-	-	-	-	0.01	4.3571	4.5405	4.4052	3.9012	4.2781	3.7968	4.4124	4.4305	4.3294	4.2461	4.5749	4.0929	4.1918	4.5206	4.4449	4.5174	4.3738	4.3397	4.5066	4.4691	4.5237	4.5123	4.4058	4.5484	4.5645	4.899	4.7935	4.6937	4.8253	4.6684	4.7385	4.7094	4.5783	4.5434	4.5287
pos_413	metab_412	metab_412	-	-	263.159	1.0484	pos	-	-	-	-	-	-	0.0137	3.2637	3.4306	3.5904	2.9876	3.4945	2.3004	3.6619	3.6623	3.6575	3.6457	3.8517	3.2806	3.6554	4.2873	4.0388	4.3177	3.6027	3.7293	3.5747	3.8262	3.7747	3.307	3.588	3.6271	3.3079	3.8417	3.4237	3.3439	3.0837	3.4418	3.2845	3.3752	3.741	3.7909	3.649
pos_414	metab_413	metab_413	-	-	158.092	0.7051	pos	-	-	-	-	-	-	0.0088	4.5215	4.5772	4.5434	4.1471	4.5882	3.743	4.3617	4.7205	4.3957	4.471	4.7531	4.3252	4.446	4.7067	4.8513	4.7468	4.6103	4.5061	4.7153	4.7769	4.475	4.7352	4.5008	4.5634	4.2357	4.6251	4.6213	4.689	4.9113	4.5595	4.6564	4.6809	4.7347	4.7923	4.7351
pos_415	metab_414	metab_414	-	-	200.091	1.0684	pos	-	-	-	-	-	-	0.0008	4.9017	5.0813	5.0301	4.5574	4.8914	4.4066	5.0905	5.138	5.1248	5.1548	5.3594	4.8294	4.9109	5.2512	5.2968	5.2293	5.0981	5.1675	5.2859	5.3669	5.3608	5.2155	5.046	5.3544	4.874	5.3331	5.1283	4.9832	5.1816	5.0625	5.1342	5.1115	5.2067	5.2046	5.201
pos_416	Aminofurantoin	metab_415	HMDB0060589	-	250.093	1.0684	pos	M+CH3OH+H, M+ACN+H	C8H8N4O3	-	59.7	-4.50901	-	0.0025	4.1653	4.5163	4.1261	3.6985	4.1785	3.5644	4.2638	4.5554	4.4425	4.3032	4.7481	3.9998	4.1362	4.8758	4.694	4.8826	4.3871	4.6738	4.6877	4.6602	4.6222	5.1169	4.2889	4.6701	4.4097	5.0353	4.6857	4.5137	4.8495	4.5212	4.6614	4.6518	4.7341	4.7103	4.7083
pos_417	metab_416	metab_416	-	-	272.112	1.0902	pos	-	-	-	-	-	-	0.0044	3.8888	4.0492	3.8702	3.1047	3.8246	2.4295	3.6434	4.0722	3.9461	4.0263	4.1199	3.573	3.803	4.3954	4.3138	4.4112	3.9431	4.2483	4.2093	4.3161	4.3536	4.2802	4.0138	4.3008	3.8584	4.572	4.1935	3.9105	4.3092	4.1981	4.2771	4.2443	4.2623	4.2398	4.2094
pos_418	metab_417	metab_417	-	-	180.068	1.0684	pos	-	-	-	-	-	-	0.0031	3.7253	3.7156	3.7164	3.689	3.6148	3.6357	3.6271	3.7424	3.6722	3.6148	3.9984	3.6563	3.7177	3.8993	3.888	3.854	3.6608	3.8973	3.8327	3.8558	3.7225	3.9792	3.7511	3.849	3.6041	3.9769	3.8515	3.716	3.9553	3.6278	3.8524	3.8244	3.8281	3.8161	3.8474
pos_419	metab_418	metab_418	-	-	158.961	1.1322	pos	-	-	-	-	-	-	0.0057	4.9358	4.6527	4.9057	5.1013	4.9836	5.1042	4.9042	4.7237	4.9107	4.8668	4.6057	5.0382	5.0529	4.4892	4.4968	4.6332	4.8248	4.5952	4.5415	4.6772	4.6236	4.2846	4.8825	4.5402	4.9446	4.4082	4.5273	4.8665	4.5225	4.7757	4.688	4.7225	4.715	4.6815	4.6415
pos_420	Benzoyl glucuronide (Benzoic acid)	metab_419	HMDB0010324	-	340.101	1.0684	pos	M+H-H2O, M+ACN+H	C13H14O8	-	63.3	-4.0096	19237-53-7	0.0025	4.3247	4.5745	4.7417	3.6296	4.1063	3.5308	4.634	4.7707	4.6076	4.7916	4.6826	4.0229	4.5399	5.0935	4.9949	5.2381	4.711	4.7659	4.8918	5.0932	4.8964	2.4913	4.7573	4.9084	4.4702	5.0629	4.8131	4.6788	4.8061	4.6241	4.7088	4.6689	4.8397	4.8302	4.8629
pos_421	metab_420	metab_420	-	-	230.101	1.0902	pos	-	-	-	-	-	-	0.0038	4.7755	4.3481	4.6919	3.4189	4.6295	3.3125	4.8797	4.3155	4.0833	4.0393	4.5891	3.6723	3.8275	4.5262	4.4256	4.5115	4.4649	4.4873	4.4613	4.4025	4.383	4.3914	4.0807	4.4821	4.1956	4.6111	4.4632	4.6917	4.8693	4.3719	4.4524	4.4227	4.3991	4.4403	4.4088
pos_422	metab_421	metab_421	-	-	245.149	0.7051	pos	-	-	-	-	-	-	0.0018	6.2625	6.389	6.2645	6.0262	6.2087	5.8839	6.326	6.3481	6.3233	6.3775	6.3141	6.201	6.1074	6.2752	6.2971	6.2828	6.2942	6.374	6.3872	6.451	6.3125	6.3522	6.3725	6.3306	6.377	6.1868	6.1415	6.2321	6.1669	6.2037	6.2312	6.1659	6.2773	6.2966	6.2804
pos_423	metab_422	metab_422	-	-	128.95	1.0902	pos	-	-	-	-	-	-	0.0043	5.3464	5.0083	5.3097	5.5084	5.3981	5.5325	5.3102	5.1377	5.3191	5.2847	5.0923	5.4404	5.4502	4.8621	4.8951	5.0055	5.2547	4.9968	4.9238	5.1241	5.0162	4.6832	5.2855	4.9307	5.3434	4.8142	4.9337	5.2629	5.0118	5.1707	5.0979	5.1274	5.0992	5.0712	5.05
pos_424	metab_423	metab_423	-	-	344.096	1.1115	pos	-	-	-	-	-	-	0.0058	4.7049	4.9654	4.9306	4.0787	4.7364	3.7917	4.7079	4.9414	4.5638	4.5554	4.8241	4.3258	4.6296	4.8833	4.7146	4.8292	4.8797	5.0681	5.0428	5.1207	4.9932	4.1155	4.7646	5.0023	4.6714	5.2292	4.809	4.8978	4.7947	4.8079	4.8583	4.8483	4.9074	4.8871	4.9139
pos_425	metab_424	metab_424	-	-	216.086	1.1322	pos	-	-	-	-	-	-	0.0054	3.8553	3.9828	3.8649	3.3251	3.6917	3.2122	3.9198	4.0158	3.7645	3.7944	4.1522	3.5538	3.8165	4.2032	4.1356	4.1854	3.9792	4.0421	4.2733	4.0451	3.9948	4.4175	3.8713	4.0615	4.0532	4.3761	4.4727	4.0351	4.3863	4.174	4.275	4.2283	4.186	4.1651	4.1241
pos_426	metab_425	metab_425	-	-	110.009	1.1115	pos	-	-	-	-	-	-	0.0041	3.5855	3.4686	3.6345	3.7385	3.6786	3.7707	3.5881	3.5517	3.6452	3.5538	3.5257	3.6587	3.7565	3.5508	3.5237	3.5981	3.5672	3.5028	3.4617	3.5731	3.5816	3.4358	3.6244	3.5469	3.7199	3.6241	3.576	3.6317	3.6208	3.5894	3.6423	3.6449	3.5549	3.5817	3.5622
pos_427	metab_426	metab_426	-	-	200.102	0.7051	pos	-	-	-	-	-	-	0.0029	4.6016	4.8456	4.6427	4.6726	4.6354	4.3781	4.7324	4.7409	4.6875	4.6984	4.8727	4.7776	4.8404	5.2217	5.4618	5.3154	4.7261	4.6204	4.9034	4.7948	4.8037	5.2222	4.6027	4.8163	4.6874	5.072	5.0122	4.6584	5.2209	4.9781	5.0793	5.0492	5.1433	5.1596	5.1846
pos_428	metab_427	metab_427	-	-	285.143	1.1322	pos	-	-	-	-	-	-	0.0106	3.1203	3.5641	2.9767	2.0071	2.1444	2.0199	3.0966	3.4812	2.2367	3.0751	3.4453	2.0615	2.8796	3.9816	3.7759	4.0609	3.2282	3.3796	3.7889	3.5426	3.7534	4.0859	3.0218	3.4549	3.194	4.2395	3.9331	3.205	3.8879	3.5657	3.7916	3.8732	3.9147	3.9215	3.8186
pos_429	metab_428	metab_428	-	-	190.143	1.1115	pos	-	-	-	-	-	-	0.002	3.9852	4.473	3.9664	3.3932	3.7913	2.9652	4.0392	4.3113	4.035	4.0293	4.6134	3.9923	4.077	4.9405	4.7938	4.9253	4.1969	4.3177	4.6497	4.4574	4.3919	4.7292	3.9742	4.4648	4.0189	4.7881	4.5373	4.1746	4.7129	4.3437	4.5086	4.4558	4.6015	4.5801	4.6029
pos_430	Glu-Val	metab_429	HMDB0028832	-	247.128	1.1322	pos	M+H-2H2O, M+H	C10H18N2O5	51.8	-	-3.1575	-	0.0034	5.3871	5.5424	5.3245	4.639	5.4104	4.6218	5.406	5.6594	5.3208	5.3443	5.7858	5.093	5.1628	5.8651	5.6691	5.8322	5.4808	5.8595	5.7018	5.6469	5.7239	5.6519	5.3872	5.6766	5.4311	5.8918	5.6818	5.509	5.8157	5.5519	5.6424	5.6081	5.6733	5.6737	5.7006
pos_431	metab_430	metab_430	-	-	286.102	1.2157	pos	-	-	-	-	-	-	0.0023	4.6117	4.6707	4.6482	4.4319	4.6093	4.4094	4.6381	4.6991	4.694	4.6881	4.8254	4.59	4.6361	4.8246	4.7937	4.9286	4.7191	4.8671	4.8249	4.9147	4.9138	4.1074	4.6658	4.8935	4.712	5.0801	4.8359	4.7294	4.8869	4.7287	4.7945	4.7759	4.7985	4.7694	4.7795
pos_432	metab_431	metab_431	-	-	268.128	1.1532	pos	-	-	-	-	-	-	0.0017	6.1189	5.7668	5.8369	4.9803	5.7822	5.3349	5.961	5.6537	5.3219	6.0467	5.2934	5.4603	4.9732	4.602	5.4218	4.3557	5.9084	5.0812	4.8732	5.7728	5.8316	4.5761	5.478	5.1191	5.8863	4.2586	4.4829	5.5978	5.4291	4.9959	4.9326	4.8118	5.5118	5.5071	5.494
pos_433	Biotin	metab_432	HMDB0000030	C00120	245.095	1.1322	pos	M+H-H2O, M+H	C10H16N2O3S	-	58.5	-3.3798	58-85-5	0.0012	4.7794	5.0191	4.8421	4.3231	4.7361	4.1504	4.8667	5.0012	4.826	4.9071	5.0027	4.7804	4.8554	5.2666	5.1373	5.2794	4.9599	5.0011	5.0605	5.1235	5.1452	5.0315	4.8599	5.0845	4.9653	5.2481	5.0653	4.9558	5.1002	5.024	5.1	5.0838	5.1817	5.173	5.1664
pos_434	metab_433	metab_433	-	-	914.613	0.5584	pos	-	-	-	-	-	-	0.0034	5.5796	4.7961	5.5239	4.4514	4.4265	4.59	3.0574	4.9298	5.1546	5.2541	3.287	4.782	5.5976	4.8464	4.7855	5.1011	4.7434	3.933	3.5663	4.1444	4.2919	4.482	4.9362	3.2065	5.3434	4.6517	5.0169	5.0166	5.0689	5.2778	5.1489	5.0733	4.8508	4.8302	4.8114
pos_435	metab_434	metab_434	-	-	778.639	0.5584	pos	-	-	-	-	-	-	0.0178	5.4586	4.4832	5.6138	3.9517	3.556	3.9111	3.6317	4.4871	4.6536	4.7472	4.1663	4.3329	5.7603	5.3239	4.5663	5.2068	4.1	4.1933	3.7834	3.9263	3.9825	4.3614	4.318	3.8451	5.7476	4.2283	5.0234	4.4743	5.5191	5.4061	5.3493	5.2336	4.4573	4.473	4.2833
pos_436	metab_435	metab_435	-	-	626.691	0.5584	pos	-	-	-	-	-	-	0.0149	5.0624	4.2156	5.3535	3.4465	3.5221	3.4594	3.5978	4.3422	4.1444	4.3438	4.3673	3.76	5.4813	5.2361	4.4857	4.9443	3.6354	4.0573	4.5635	4.5254	4.4558	4.098	3.8519	4.4082	5.6103	4.0688	4.7988	4.3548	5.3957	5.1983	5.1674	5.0218	4.3436	4.2625	4.2619
pos_437	metab_436	metab_436	-	-	448.751	0.5584	pos	-	-	-	-	-	-	0.0114	2.3002	4.7728	4.6907	2.1097	4.0458	2.1225	3.6836	4.8755	4.0293	4.3843	4.4616	2.1642	4.8255	4.6657	4.8142	4.6395	4.5841	3.9184	4.4804	4.658	4.746	4.3883	4.1461	4.3343	4.7519	4.0779	4.7075	4.8361	4.9871	4.9868	4.8278	4.9064	4.7053	4.8065	4.7468
pos_439	metab_438	metab_438	-	-	253.092	1.1748	pos	-	-	-	-	-	-	0.0022	4.7686	4.599	4.6325	4.2913	5.0718	4.3767	4.6538	4.6916	4.7118	4.7693	4.7143	4.6591	4.6383	5.4976	5.2252	5.4662	4.7854	4.7857	4.7885	4.8026	4.734	6.0612	4.7015	4.7392	4.8997	5.0509	4.7344	4.9195	4.906	4.8322	4.8704	4.8596	5.3459	5.3271	5.3469
pos_440	metab_439	metab_439	-	-	218.138	1.1748	pos	-	-	-	-	-	-	0.0011	3.9896	4.0493	3.973	3.9328	4.0253	3.9253	3.983	4.0702	4.0079	4.0785	4.3249	3.98	4.0245	4.3986	4.3528	4.4348	4.0187	4.303	4.289	4.2905	4.3647	4.5054	4.0398	4.3702	4.0663	4.7588	4.4544	4.21	4.6428	4.2597	4.4226	4.3746	4.3349	4.3324	4.3418
pos_441	metab_440	metab_440	-	-	436.185	1.1748	pos	-	-	-	-	-	-	0.0122	3.191	3.9181	3.3311	3.1533	3.2675	3.0577	3.3008	3.7808	3.5114	3.5257	3.9174	3.4882	3.502	4.2935	4.2525	4.3257	3.5934	3.8782	4.0191	3.8071	4.0276	4.2657	3.6317	3.9171	3.3316	4.0053	3.6742	3.2865	3.5486	3.5587	3.8543	3.6293	3.9547	4.081	4.0244
pos_442	metab_441	metab_441	-	-	190.088	1.2157	pos	-	-	-	-	-	-	0.0051	3.6806	3.8885	3.7685	3.4345	3.6724	3.326	3.6318	3.8944	3.6221	3.4879	3.8625	3.38	3.6152	3.9965	3.9681	4.0451	3.8534	4.0553	4.0298	4.1049	3.8306	3.9528	3.5572	4.0204	3.5788	4.1231	4.058	3.8029	4.1406	3.8497	3.9365	3.9253	3.9332	3.9411	3.981
pos_443	metab_442	metab_442	-	-	247.074	1.1954	pos	-	-	-	-	-	-	0.0036	4.2746	4.6362	4.2956	3.0908	4.3214	3.1036	4.3823	4.8724	4.4507	4.3611	4.8408	3.8991	3.9564	4.4861	4.601	4.5099	4.5136	4.8037	4.7223	4.6746	4.7187	4.5551	4.5171	4.7646	4.2748	4.7927	4.7934	4.5473	5.1104	4.6844	4.78	4.7413	4.6873	4.6828	4.6524
pos_444	metab_443	metab_443	-	-	259.128	1.1954	pos	-	-	-	-	-	-	0.0024	3.6625	3.919	3.6636	2.7218	3.2502	2.7346	3.9061	3.9115	3.9077	3.7984	4.0037	2.9219	3.3566	4.1991	4.0768	4.2925	3.9867	4.0457	4.1817	4.0407	4.3373	3.9402	3.7248	4.2557	3.6242	4.311	4.0694	4.0672	3.9107	3.9677	4.0191	3.991	4.1204	4.1234	4.11
pos_445	metab_444	metab_444	-	-	578.769	0.5584	pos	-	-	-	-	-	-	0.0046	5.6793	5.3775	5.3285	5.2994	5.4959	5.3893	5.2306	5.4862	5.6762	5.692	5.0201	5.5752	5.3179	4.3277	5.1964	5.2074	5.5636	4.4198	4.882	5.1589	5.2024	4.9663	5.5889	4.8093	4.6738	5.2174	5.208	5.6653	4.4734	5.2563	4.9963	5.1999	5.4343	5.4162	5.3707
pos_446	metab_445	metab_445	-	-	512.78	0.5584	pos	-	-	-	-	-	-	0.0048	5.4049	5.1405	5.0557	5.1455	5.3987	5.2273	5.145	5.2431	5.4624	5.4705	4.9549	5.3884	5.0239	3.9116	4.9501	4.9043	5.383	4.5438	4.7769	5.0748	5.0476	4.703	5.4111	4.7476	4.2936	4.999	4.9382	5.4208	4.1954	4.9643	4.7594	4.9096	5.2011	5.2271	5.1796
pos_447	metab_446	metab_446	-	-	171.065	1.2157	pos	-	-	-	-	-	-	0.0012	3.6886	3.9462	3.5158	2.8009	3.5526	2.7418	3.6682	3.7777	3.7078	3.7587	4.0973	3.5231	3.7165	4.3208	4.1902	4.3145	3.5913	3.6917	3.8986	3.7278	3.9622	3.9242	3.5255	3.9574	4.1465	4.6589	4.5944	4.2956	4.6575	4.3899	4.4972	4.4778	4.2333	4.2278	4.2317
pos_448	metab_447	metab_447	-	-	360.128	1.2157	pos	-	-	-	-	-	-	0.0088	2.8617	3.9809	3.6171	2.7078	2.7833	2.7206	3.239	3.7824	3.4803	3.3785	3.8189	3.3372	3.6386	4.2415	4.1862	4.297	3.4027	3.9157	4.0675	4.0177	3.9929	3.8787	3.5161	4.0157	4.1838	4.599	4.3748	4.343	4.3279	4.4209	4.3031	4.4418	4.2026	4.1177	4.1096
pos_449	metab_448	metab_448	-	-	528.754	0.5584	pos	-	-	-	-	-	-	0.0031	5.5461	5.04	5.4878	4.6229	4.8573	4.7301	4.7948	5.1191	5.1368	5.2751	4.9242	4.9153	5.5472	4.9623	4.9847	5.2672	5.0862	4.7399	4.7461	4.964	4.8794	4.7588	5.0252	4.7198	5.3087	4.8784	5.1671	5.2266	5.1033	5.3832	5.2336	5.3101	5.0691	5.0257	5.0491
pos_450	metab_449	metab_449	-	-	364.79	0.5584	pos	-	-	-	-	-	-	0.0044	4.0002	4.9926	3.9623	3.8021	4.5037	3.8149	4.2233	5.1657	4.1665	4.5311	4.8983	3.8569	3.8841	4.2244	5.0631	4.7547	4.8612	4.3181	5.062	5.1198	5.1669	4.6191	4.3108	4.8911	3.9848	4.4913	4.8638	5.0428	4.2141	5.0096	4.8139	5.0264	4.9878	4.9909	5.039
pos_451	metab_450	metab_450	-	-	312.129	1.2587	pos	-	-	-	-	-	-	0.0015	5.5301	5.6915	5.6057	5.184	5.5405	5.017	5.6311	5.6979	5.6706	5.721	5.8394	5.51	5.6433	5.9273	5.8477	5.9471	5.7134	5.8883	5.8888	5.9544	5.9859	5.163	5.6774	5.947	5.7394	6.0504	5.8027	5.6778	5.9279	5.7164	5.7634	5.7608	5.8582	5.8701	5.8627
pos_452	metab_451	metab_451	-	-	143.033	1.3208	pos	-	-	-	-	-	-	0.0027	4.4234	4.4523	4.384	4.4595	4.4177	4.4325	4.4315	4.3389	4.4934	4.4855	4.4138	4.4762	4.4448	4.4104	4.4349	4.5208	4.4271	4.199	4.5662	4.3165	4.3127	4.1419	4.4919	4.3443	4.4276	4.5714	4.5127	4.4097	4.4628	4.5065	4.5063	4.5213	4.4838	4.4491	4.4646
pos_453	metab_452	metab_452	-	-	316.185	1.2371	pos	-	-	-	-	-	-	0.0046	4.4859	4.8278	4.4251	3.0939	4.2704	2.8766	4.5105	4.7852	4.6129	4.4853	4.4683	3.9181	4.1361	4.5547	4.5714	4.5449	4.5622	4.5451	4.7903	4.7246	4.6389	4.6646	4.592	4.8608	4.429	4.7571	4.9056	4.6006	4.8291	4.8541	4.8569	4.8441	4.6419	4.6719	4.6834
pos_454	metab_453	metab_453	-	-	319.065	1.2587	pos	-	-	-	-	-	-	0.003	4.5172	4.6633	4.4491	3.6573	4.3391	3.3841	4.686	4.3538	4.6781	4.5775	4.7414	4.1964	3.9792	4.607	4.8274	4.6331	4.5493	3.9767	4.9144	4.1744	4.4016	3.8602	4.5944	4.5671	4.2557	4.8006	4.7497	4.4546	4.7527	4.5744	4.6709	4.65	4.5773	4.6116	4.5834
pos_455	Delta-Valerolactam	metab_454	HMDB0011749	-	100.076	1.2371	pos	M+H, M+ACN+Na	C5H9NO	86.7	-	0.679335	-	0.0007	5.0245	5.1267	5.0957	4.699	5.1291	4.7013	4.9708	5.1764	4.995	5.0223	5.1376	5.0737	5.0912	5.8165	5.6857	5.7505	4.9809	5.1165	5.1861	5.1794	5.2435	5.3638	4.8852	5.2471	5.002	5.2501	5.2568	4.9419	5.3281	5.1389	5.191	5.1713	5.4006	5.407	5.404
pos_456	metab_455	metab_455	-	-	314.134	1.2371	pos	-	-	-	-	-	-	0.0043	3.6636	3.922	3.5708	3.1912	3.6477	2.4845	3.7169	3.8635	3.9608	3.7905	4.0274	3.5903	3.6261	4.0887	4.0292	4.1057	3.865	4.1438	4.0457	4.1295	4.1222	3.9554	3.6782	4.135	3.8651	4.3564	4.1277	3.8716	4.3209	3.9804	4.0434	4.0674	4.0582	4.0806	4.0345
pos_457	metab_456	metab_456	-	-	260.021	1.2371	pos	-	-	-	-	-	-	0.0024	4.4147	4.4802	4.7312	3.5625	4.0065	3.3613	4.4223	4.6853	4.1165	4.1413	4.684	4.0583	4.0316	4.7105	4.6464	4.673	4.5709	4.863	5.041	4.4787	4.8616	4.7709	4.1956	4.9296	3.7539	4.4403	4.3123	4.0035	3.6832	4.0441	4.0438	4.0883	4.5914	4.617	4.6013
pos_459	metab_458	metab_458	-	-	165.127	2.2387	pos	-	-	-	-	-	-	0.0148	3.501	3.7375	3.4651	2.7799	2.8699	2.6652	3.247	3.6807	3.3566	3.5872	3.8525	3.2339	3.3177	3.8743	3.869	3.8804	3.471	3.6536	3.8467	3.7381	3.8518	3.5641	3.4944	3.8432	3.6588	4.1873	4.0042	3.7663	4.1426	3.9588	4.032	3.9399	3.8531	3.8881	3.7793
pos_460	metab_459	metab_459	-	-	280.117	2.259	pos	-	-	-	-	-	-	0.0023	4.2519	4.1256	3.8505	3.5025	3.7818	3.189	4.2122	4.1848	4.2068	3.7881	4.3562	3.6729	3.707	4.5114	4.4099	4.4263	3.9593	4.0453	4.4354	4.0586	4.2055	4.409	3.7944	4.3104	4.5481	4.8405	4.6174	4.1937	4.7394	4.6318	4.6862	4.6362	4.4557	4.446	4.4383
pos_461	metab_460	metab_460	-	-	392.19	2.259	pos	-	-	-	-	-	-	0.0076	3.5935	4.3607	3.7773	3.2489	3.3244	3.2617	3.4943	4.2423	3.4887	4.1486	4.2853	3.7227	3.3309	4.5614	4.6404	4.5056	4.0466	4.3803	4.416	4.2502	4.3596	5.0578	3.9074	4.4373	3.6163	4.5357	4.3314	3.9935	4.3231	4.0013	4.1284	4.042	4.2329	4.2995	4.3119
pos_462	metab_461	metab_461	-	-	192.101	2.259	pos	-	-	-	-	-	-	0.0054	4.08	4.2918	4.0018	3.7648	3.9836	3.7958	4.1167	4.2358	4.0185	3.9457	4.2227	3.8863	3.9682	4.4126	4.3623	4.349	4.1482	4.055	4.4334	4.1691	4.3148	4.3589	4.0894	4.3655	4.1056	4.5546	4.48	4.0479	4.5845	4.3075	4.4439	4.3888	4.2936	4.311	4.3505
pos_463	metab_462	metab_462	-	-	174.112	2.279	pos	-	-	-	-	-	-	0.0013	4.8349	5.0454	4.7996	4.5745	4.8066	4.5998	4.8292	5.0139	4.9674	4.8814	5.1477	4.7404	4.6884	5.2323	5.1909	5.2372	4.9409	5.0685	5.2133	5.0414	5.025	5.2308	4.9104	5.1042	4.8654	5.2405	5.1907	4.9632	5.2415	5.0433	5.1275	5.1002	5.1227	5.1057	5.1132
pos_464	metab_463	metab_463	-	-	652.409	2.279	pos	-	-	-	-	-	-	0.0046	4.4094	4.3454	4.2877	4.5471	4.506	4.5274	4.3451	4.275	4.3795	4.3991	4.2215	4.5459	4.5288	4.0729	4.1625	4.253	4.2641	4.0832	3.9994	4.2711	4.1178	3.8445	4.3321	4.0078	4.426	3.933	4.1518	4.3244	4.0939	4.3337	4.2271	4.2396	4.2125	4.2133	4.1819
pos_465	metab_464	metab_464	-	-	242.138	2.2995	pos	-	-	-	-	-	-	0.0033	4.508	4.8612	4.4987	4.0394	4.212	3.7259	4.6624	4.7436	4.3537	4.4688	4.6996	4.2365	4.2679	4.8041	4.8118	4.7761	4.6648	4.5133	4.8601	4.842	4.8502	4.8573	4.5832	4.8619	4.6146	5.2529	5.1365	4.8902	5.3075	5.0543	5.1181	5.0983	4.8877	4.9109	4.885
pos_466	metab_465	metab_465	-	-	187.086	2.3397	pos	-	-	-	-	-	-	0.0026	4.4933	4.5873	4.3852	4.2096	4.366	4.0869	4.621	4.6151	4.5149	4.6357	4.8477	4.2973	4.2414	4.9378	4.9199	4.8641	4.5352	4.8545	4.8553	4.6949	4.6863	5.0941	4.6246	4.7941	4.6161	4.9081	4.7939	4.7243	4.8819	4.7531	4.7548	4.7792	4.78	4.7613	4.7957
pos_467	metab_466	metab_466	-	-	231.076	2.3397	pos	-	-	-	-	-	-	0.0038	4.6159	4.6227	4.5406	4.0119	4.3988	3.6743	4.775	4.7936	4.6609	4.7975	5.0348	4.2387	4.3605	5.0772	5.0618	5.0463	4.6565	5.0079	5.0091	4.8581	4.7937	4.8807	4.7638	4.9168	4.6599	4.9318	4.9142	4.7846	4.9616	4.785	4.8208	4.7993	4.8874	4.882	4.9267
pos_468	metab_467	metab_467	-	-	278.149	2.3397	pos	-	-	-	-	-	-	0.0022	5.5981	5.6989	5.5837	5.1532	5.5131	4.9298	5.7335	5.7104	5.6856	5.7687	5.884	5.3758	5.4871	6.1004	6.0771	6.0391	5.6703	5.9043	5.8742	5.8127	5.7807	5.8952	5.7255	5.8626	5.7585	5.9219	5.8302	5.751	5.9968	5.8202	5.8455	5.8469	5.8581	5.8687	5.884
pos_469	metab_468	metab_468	-	-	330.226	2.3198	pos	-	-	-	-	-	-	0.0017	4.3455	4.5652	4.1135	3.7125	3.9144	3.343	4.2079	4.4315	4.5214	4.5738	4.5639	3.7764	4.0249	5.0183	4.985	4.9001	4.4602	4.6032	4.5256	4.5798	4.5364	5.0564	4.3104	4.5577	4.6243	5.0731	4.8586	4.4424	4.9962	4.8018	4.8864	4.8087	4.7266	4.7352	4.7391
pos_470	metab_469	metab_469	-	-	222.075	2.2995	pos	-	-	-	-	-	-	0.0037	4.2385	4.2972	4.2925	4.0667	3.988	3.9792	4.1503	4.3568	4.1382	4.23	4.5527	4.0614	4.2004	4.5227	4.4902	4.4853	4.1405	4.4751	4.606	4.3373	4.4053	4.637	4.1497	4.4852	4.5834	4.9774	4.9057	4.6793	5.0046	4.7913	4.8599	4.8121	4.615	4.6133	4.6287
pos_471	metab_470	metab_470	-	-	397.146	2.4219	pos	-	-	-	-	-	-	0.0135	3.4681	4.3503	3.3791	1.8385	3.183	1.8512	3.5092	3.9169	3.8978	4.0352	4.2511	3.5303	1.9195	4.3889	4.3775	4.5792	3.745	3.5994	4.2196	4.1038	4.1352	2.8512	3.9405	4.1421	2.9904	4.2195	4.3767	3.8316	4.1787	3.8974	4.0158	4.0079	4.3323	4.2391	4.2184
pos_472	metab_471	metab_471	-	-	499.17	2.4433	pos	-	-	-	-	-	-	0.0058	4.3097	4.6305	4.1627	3.3087	3.6793	3.3215	4.2269	4.6157	4.1586	4.0048	4.574	3.3635	3.4747	4.4284	4.591	4.5188	4.4202	4.5353	4.6991	4.716	4.6406	3.7745	4.3005	4.7391	3.6217	4.7622	4.6803	4.301	4.5557	4.2849	4.3983	4.352	4.5437	4.5439	4.4936
pos_473	metab_472	metab_472	-	-	313.111	2.4219	pos	-	-	-	-	-	-	0.015	3.5408	3.3989	3.2115	3.8475	3.7728	2.593	3.5427	3.6684	4.1594	3.9783	3.9728	4.0835	4.0585	4.1758	3.9221	3.9274	3.3967	3.6901	3.6713	3.475	3.3544	3.5529	3.7158	3.6142	2.7626	4.0276	3.9465	3.8035	3.8705	3.9549	3.9559	3.8758	3.6957	3.7694	3.7038
pos_474	metab_473	metab_473	-	-	623.103	2.4433	pos	-	-	-	-	-	-	0.0071	4.4547	4.185	4.4101	3.4564	4.0187	3.7911	4.2967	4.4284	4.3834	4.3607	4.4022	4.0349	4.025	4.0701	4.2953	4.3099	4.3942	4.4355	4.4152	4.5419	4.3669	5.0298	4.4413	4.2639	3.6257	4.0158	4.1776	4.3	3.8223	4.0257	3.9852	4.0722	4.3278	4.2665	4.2517
pos_475	metab_474	metab_474	-	-	165.073	2.4219	pos	-	-	-	-	-	-	0.0021	3.7046	3.4778	3.5249	2.4853	3.4177	2.7377	3.2412	3.4944	3.4062	3.1723	3.211	3.1204	2.9246	3.8299	3.7863	3.8179	4.2995	3.7831	3.477	3.4304	3.3864	6.2935	3.9503	3.6339	2.4598	2.8119	3.2913	3.272	2.7694	2.8754	3.1443	2.8726	4.9851	4.9852	4.9797
pos_476	metab_475	metab_475	-	-	375.118	2.4433	pos	-	-	-	-	-	-	0.0054	3.4703	3.4098	3.9123	2.8567	2.9322	2.8696	3.624	3.966	4.2106	4.3223	4.0988	3.234	3.4885	4.0439	4.89	4.4314	4.1068	4.7117	4.7972	4.7759	4.3361	3.151	3.9729	4.7679	3.4693	3.8978	4.645	3.9734	3.5902	4.2165	4.3962	4.3178	4.8211	4.8594	4.8113
pos_477	metab_476	metab_476	-	-	231.064	2.4433	pos	-	-	-	-	-	-	0.0059	3.8291	3.8481	3.863	1.6728	3.2833	1.6854	3.7759	4.1063	3.904	3.7349	4.1901	3.3445	3.1476	4.1752	4.2164	4.0677	3.9486	4.7719	4.3806	4.387	4.1025	1.9628	3.7404	4.3952	2.7614	3.9103	3.8132	3.7086	3.3002	3.3915	3.4639	3.4894	3.9465	4.0083	3.9569
pos_478	metab_477	metab_477	-	-	471.219	2.4433	pos	-	-	-	-	-	-	0.0175	2.727	3.3597	2.6656	2.5347	2.6101	2.5475	3.2389	3.1808	2.683	2.7092	3.2365	2.5894	2.6166	3.3635	3.2167	3.8658	3.0491	2.7583	2.9231	3.0534	3.6615	3.8862	2.6986	3.3043	3.8205	4.8049	4.8659	4.4439	4.7876	4.5816	4.6276	4.6041	4.2616	4.1885	4.1525
pos_479	metab_478	metab_478	-	-	219.174	2.4433	pos	-	-	-	-	-	-	0.0064	3.4377	3.8734	3.4642	2.2455	2.949	2.2582	3.6677	3.727	3.3236	3.6625	3.6726	2.3001	2.7422	4.041	4.0051	3.9104	3.7138	3.4835	4.139	3.9078	4.0241	3.8175	3.7151	4.1232	4.1004	4.6691	4.5092	4.0901	4.5703	4.3751	4.4501	4.4075	4.1899	4.1517	4.228
pos_480	metab_479	metab_479	-	-	428.002	2.4433	pos	-	-	-	-	-	-	0.0199	4.3013	4.0909	4.2581	4.1131	4.3081	4.3227	4.208	4.1962	4.2408	4.2723	3.958	4.37	4.288	3.9603	3.8105	4.0097	4.2327	3.8296	3.9244	4.1574	4.1982	3.3116	4.2821	3.3176	4.1116	3.8525	3.8882	4.2696	4.0294	4.2294	4.0209	4.1273	4.065	3.9642	4.0583
pos_481	metab_480	metab_480	-	-	170.059	2.4433	pos	-	-	-	-	-	-	0.0022	3.8162	4.2126	3.6954	3.6452	3.613	3.6802	3.9693	4.0954	3.9805	3.8383	4.0997	3.7579	3.6444	4.3253	4.323	4.2879	3.9818	4.1034	4.233	4.0004	4.239	4.4604	3.7415	4.2385	3.7768	4.1064	3.9386	3.8789	4.1879	3.9231	4.0741	3.914	4.153	4.1697	4.1559
pos_482	metab_481	metab_481	-	-	369.048	2.4629	pos	-	-	-	-	-	-	0.0026	5.5998	5.3169	5.6087	5.4061	5.5344	5.5005	5.5645	5.4722	5.5815	5.5584	5.4436	5.5661	5.5784	5.2665	5.2722	5.3954	5.5274	5.4255	5.3866	5.4818	5.3867	5.0484	5.5767	5.3557	5.3889	5.1568	5.2291	5.5317	5.2003	5.4082	5.3422	5.3754	5.4026	5.3729	5.3972
pos_483	metab_482	metab_482	-	-	448.122	2.4629	pos	-	-	-	-	-	-	0.0086	4.399	4.6906	4.3269	3.6048	4.3308	3.769	4.283	4.7098	4.4317	4.0744	4.6155	4.0323	3.9585	4.7049	4.6525	4.6824	4.4902	4.7037	4.9114	4.6177	4.833	3.4483	4.2871	4.8442	4.3755	4.935	4.8616	4.5981	4.7941	4.7182	4.7829	4.7224	4.6574	4.7273	4.6773
pos_484	metab_483	metab_483	-	-	446.237	2.4629	pos	-	-	-	-	-	-	0.0062	4.0483	4.5926	4.337	3.6832	3.8336	3.6961	4.2167	4.5592	4.0779	4.2386	4.6282	3.7381	3.9917	4.7293	4.7062	4.6931	4.179	4.39	4.6097	4.7397	4.5219	4.5485	4.2611	4.602	4.3419	5.0051	4.9008	4.758	4.9147	4.7665	4.8418	4.8294	4.7025	4.7483	4.7437
pos_485	metab_484	metab_484	-	-	226.143	2.4629	pos	-	-	-	-	-	-	0.006	4.2129	4.5837	4.2811	3.5771	3.9569	3.5544	4.3876	4.4944	3.9493	4.2928	4.1161	4.0141	3.8946	4.4928	4.4478	4.4362	4.3524	3.9438	4.4783	4.581	4.4746	4.5219	4.4609	4.4794	4.1935	4.8314	4.6142	4.3633	4.8543	4.5983	4.6858	4.6477	4.5414	4.5255	4.4691
pos_486	metab_485	metab_485	-	-	391.261	2.4629	pos	-	-	-	-	-	-	0.0019	4.9471	4.8231	4.7959	4.0807	4.3417	4.1909	4.5757	5.02	4.7062	4.3979	4.8133	4.4491	4.3738	5.0065	4.9308	4.9738	4.9285	5.1718	5.138	4.9994	4.6267	5.477	4.4982	4.9022	3.9421	4.922	4.7847	4.5085	4.5965	4.3721	4.5469	4.526	5.0095	5.0015	4.9832
pos_487	metab_486	metab_486	-	-	207.137	2.4629	pos	-	-	-	-	-	-	0.0035	4.2233	4.646	4.3636	3.9447	4.333	3.8321	4.3741	4.5698	4.3047	4.4036	4.7464	4.17	4.3432	4.8729	4.795	4.767	4.3625	4.54	4.6735	4.6829	4.6738	4.9398	4.3821	4.6934	4.6566	5.2059	5.0518	4.7704	5.1463	4.9098	4.9965	4.9566	4.8388	4.8259	4.7923
pos_488	metab_487	metab_487	-	-	462.138	2.4822	pos	-	-	-	-	-	-	0.0049	5.0208	5.0343	4.8462	3.691	4.8429	4.178	4.8494	5.1414	4.9813	4.6468	5.0797	4.463	4.5548	5.0207	5.045	5.0899	5.0071	5.1954	5.192	5.0809	5.2034	4.2426	4.763	5.1705	4.7859	4.9904	4.9923	5.008	4.9398	4.9625	5.0343	4.9694	5.0655	5.1021	5.0994
pos_489	metab_488	metab_488	-	-	409.172	2.4822	pos	-	-	-	-	-	-	0.0042	3.8656	4.2638	3.7076	2.8097	2.8852	2.8226	3.8638	4.1304	4.1241	3.3351	4.4362	3.6433	2.8917	4.557	4.4703	4.5519	4.0102	4.1065	4.3481	4.0428	4.2039	4.2187	3.4437	4.2367	4.2335	4.7668	4.9149	4.1172	4.6596	4.395	4.5608	4.5097	4.4352	4.4151	4.4661
pos_490	metab_489	metab_489	-	-	148.066	2.503	pos	-	-	-	-	-	-	0.0036	3.7315	3.5534	3.7449	2.102	3.9054	2.4732	3.9887	4.2748	2.6861	3.7456	4.5734	2.5137	3.1741	3.3543	3.419	3.3929	3.6471	4.6229	3.4378	4.3061	4.2207	3.1623	3.5757	4.1393	2.2837	3.3723	3.6786	3.5513	4.3636	3.1067	3.2255	3.3479	3.6733	3.6372	3.6493
pos_491	metab_490	metab_490	-	-	500.247	2.5234	pos	-	-	-	-	-	-	0.0053	4.382	4.7628	4.5871	3.6846	4.0826	3.6975	4.5032	4.763	4.4496	4.2543	4.7559	3.7407	3.7667	4.8534	4.7928	4.7641	4.6592	5.0861	4.9227	5.0097	4.731	4.9283	4.242	4.875	4.0429	4.9311	4.896	4.5307	4.8216	4.7125	4.769	4.783	4.8466	4.8208	4.7817
pos_492	metab_491	metab_491	-	-	253.154	2.5437	pos	-	-	-	-	-	-	0.0197	2.7748	3.847	3.5039	2.9816	2.7261	3.1069	3.2992	3.7171	3.4398	3.2178	2.9198	3.385	3.3916	4.0365	3.9249	3.9583	3.516	3.1137	3.9067	3.8136	4.1894	3.6549	3.2378	4.09	3.2438	3.648	3.4072	3.6696	3.2721	3.5143	3.3465	3.4919	3.7957	3.8826	3.6911
pos_494	metab_493	metab_493	-	-	927.51	2.5437	pos	-	-	-	-	-	-	0.0035	5.2494	5.3855	5.0734	4.7873	5.1337	4.9209	5.1687	5.4229	5.2299	5.2449	5.567	5.0249	5.0782	5.2488	5.3367	5.2541	5.3312	5.4514	5.3949	5.2741	5.3379	5.42	5.243	5.4264	4.9149	5.3568	5.1491	4.9349	5.3493	5.1366	5.1857	5.1977	5.2774	5.2303	5.2482
pos_495	metab_494	metab_494	-	-	302.159	2.5647	pos	-	-	-	-	-	-	0.0094	3.9946	4.2792	3.1529	2.5359	2.6113	2.5487	3.8709	3.9542	3.1691	2.7103	3.498	2.5906	2.7457	4.2515	4.0943	4.0542	3.5925	3.7435	4.0794	3.6221	3.9015	4.0893	2.6998	3.8307	2.8869	4.1187	4.0808	3.8185	4.2134	3.8729	3.989	3.9814	4.0623	4.0338	3.9722
pos_496	metab_495	metab_495	-	-	513.135	2.5647	pos	-	-	-	-	-	-	0.0056	4.3006	4.639	4.3338	3.4422	3.6286	3.455	4.0478	4.6661	4.3418	4.4495	4.8119	3.7536	3.9747	4.8884	4.8642	4.7889	4.4848	4.8424	4.9309	4.8029	4.7187	3.7367	4.2839	4.8974	3.9986	4.6291	4.5714	4.5408	4.2663	4.2505	4.2974	4.3614	4.6797	4.6659	4.6502
pos_497	metab_496	metab_496	-	-	287.069	2.5647	pos	-	-	-	-	-	-	0.0086	3.6668	3.9628	3.658	3.108	3.5899	3.1209	3.5783	3.8904	3.679	3.7311	4.0219	3.3279	3.7174	4.1076	3.9736	4.0886	3.7737	3.519	3.8542	3.7386	3.7661	4.0605	3.629	3.8358	3.7538	3.5903	3.9579	3.7528	3.9906	3.7176	3.8793	3.8334	3.9606	3.8935	3.9763
pos_498	metab_497	metab_497	-	-	251.184	2.5857	pos	-	-	-	-	-	-	0.0005	5.3569	5.1416	5.3048	5.4926	5.4227	5.5293	5.3617	5.2135	5.3168	5.3219	5.1623	5.4529	5.4797	5.0971	5.0886	5.1615	5.2956	5.0784	5.1036	5.1912	5.152	4.9926	5.3153	5.1095	5.322	5.1083	5.1265	5.3163	5.1844	5.286	5.22	5.2594	5.205	5.2055	5.1996
pos_499	metab_498	metab_498	-	-	192.101	2.5647	pos	-	-	-	-	-	-	0.0063	4.0414	4.296	3.9321	3.5212	3.908	3.4946	4.0912	4.2278	3.8238	3.9257	4.1356	3.7429	3.7293	4.2295	4.1789	4.1489	4.0363	4.0932	4.3047	4.1925	4.2197	4.0656	3.9823	4.2582	3.8155	4.3528	4.21	4.1447	4.4338	4.1549	4.2712	4.2425	4.1805	4.1435	4.2027
pos_500	metab_499	metab_499	-	-	387.2	2.6061	pos	-	-	-	-	-	-	0.0025	2.5185	3.7551	2.4957	2.3649	2.4402	2.3777	2.5157	2.6596	2.513	2.5392	3.033	2.4196	2.4467	4.3188	4.0802	4.0592	2.5532	3.5008	3.9406	3.3327	3.7332	4.17	2.5287	3.7843	3.255	4.5937	4.2232	3.8544	4.0687	4.0765	4.1029	4.1032	4.0629	4.0665	4.0553
pos_501	metab_500	metab_500	-	-	204.122	2.6061	pos	-	-	-	-	-	-	0.0052	4.0244	4.5577	3.9992	3.5497	3.6487	2.6358	4.1592	4.4577	4.1543	3.9905	4.4469	3.7723	3.5573	4.325	4.3112	4.2257	4.3012	4.4749	4.497	4.4428	4.6439	4.5558	4.0805	4.6083	3.9645	4.504	4.4475	3.9841	4.2948	4.1374	4.2328	4.2194	4.3696	4.3224	4.376
pos_502	metab_501	metab_501	-	-	123.117	2.6061	pos	-	-	-	-	-	-	0.0028	3.6684	3.7767	3.6227	3.6095	3.6786	3.6581	3.6714	3.693	3.6795	3.7409	3.7154	3.6285	3.7512	4.0547	3.9262	3.932	3.779	3.5999	3.9371	3.7426	3.6829	3.834	3.7617	3.7693	3.7461	4.0993	4.0181	3.8441	4.0538	3.9219	3.9557	3.9455	3.8772	3.872	3.8507
pos_503	5-Methoxyindoleacetate	metab_502	HMDB0004096	C05660	188.07	2.6685	pos	M+H-H2O, M+H	C11H11NO3	-	71.8	-2.97176	3471-31-6	0.004	5.0137	5.3284	5.1075	4.2767	5.1072	4.5075	5.106	5.4362	5.2263	5.2217	5.5253	4.8591	4.7986	5.4831	5.5085	5.4074	5.3749	5.5831	5.5393	5.5164	5.4073	5.6321	5.3215	5.5116	5.1872	5.4457	5.5573	5.2107	5.5106	5.2903	5.3651	5.2998	5.4543	5.4234	5.402
pos_504	Tyrosyl-Glycine	metab_503	HMDB0029105	-	261.086	2.6685	pos	M+H-2H2O, M+Na	C11H14N2O4	-	60.8	-2.98361	-	0.0077	4.3729	4.3673	4.3398	3.4188	4.1268	3.6529	4.3083	4.6121	4.2568	4.3726	4.609	3.8278	4.0832	4.6624	4.6971	4.5594	4.335	4.3234	4.6388	4.4597	4.3861	4.8049	4.4445	4.5677	4.0002	4.769	4.7791	4.355	4.8373	4.4877	4.5975	4.5331	4.5861	4.5613	4.5294
pos_505	metab_504	metab_504	-	-	174.091	2.7279	pos	-	-	-	-	-	-	0.0092	3.7861	3.7536	3.7308	3.6541	3.846	3.7428	3.745	3.769	3.5321	3.8347	3.8467	3.9008	3.7185	3.8175	3.881	3.78	3.8863	3.7669	3.7655	3.8635	3.7626	3.8119	3.7141	3.7902	3.909	4.0441	3.9494	3.8881	4.097	3.9264	4.0004	3.8964	3.8845	3.7943	3.8052
pos_506	metab_505	metab_505	-	-	249.113	2.6685	pos	-	-	-	-	-	-	0.0149	3.6953	4.0007	3.7323	3.1732	3.5852	3.186	3.6757	4.0712	3.7738	3.8908	4.1855	3.3691	3.2552	4.2073	4.1696	4.1646	3.9613	4.2979	4.2577	4.2672	4.0698	4.3469	3.9002	4.2703	3.8491	4.2488	4.2624	4.0144	4.2266	4.0079	4.0903	4.0105	4.2147	4.1253	4.0933
pos_507	metab_506	metab_506	-	-	280.116	2.6879	pos	-	-	-	-	-	-	0.0059	3.763	4.1566	3.9935	2.9589	4.0105	2.9717	3.7362	4.1941	3.8925	3.9541	4.3035	3.3922	3.6977	4.3508	4.2475	4.1505	3.9974	4.402	4.2827	4.3773	4.3734	4.5682	3.9517	4.4151	3.8894	4.6058	4.5576	4.1069	4.6166	4.3015	4.4335	4.3508	4.3588	4.3398	4.2895
pos_508	metab_507	metab_507	-	-	310.2	2.708	pos	-	-	-	-	-	-	0.0061	3.7566	4.1081	3.5424	3.2618	3.4778	3.2746	4.0081	4.1018	3.7697	3.9637	4.3308	3.3166	3.4864	4.4651	4.4332	4.3371	4.0396	4.3065	4.264	4.1273	4.3525	4.606	3.7666	4.3677	4.0186	4.5217	4.1709	3.9049	4.3898	4.1833	4.2773	4.2369	4.326	4.2742	4.262
pos_509	metab_508	metab_508	-	-	399.175	2.6879	pos	-	-	-	-	-	-	0.0187	3.2432	3.9647	3.4061	2.545	3.5038	2.5578	2.696	3.6948	3.6513	4.0148	3.9253	3.3444	2.9244	4.179	4.2998	3.9458	3.6638	4.2551	3.9944	3.9118	4.3884	4.4256	3.534	4.3341	3.6116	4.3474	4.2031	3.4455	4.0254	3.5725	3.9438	3.7227	4.1198	3.926	3.9733
pos_510	metab_509	metab_509	-	-	234.148	2.7279	pos	-	-	-	-	-	-	0.0096	3.1752	3.7006	3.3959	3.5675	3.4638	3.6945	3.791	3.4892	3.3592	3.6959	3.6209	3.7099	3.6822	3.74	3.8336	3.7479	3.7663	3.4604	3.5165	3.6145	3.7564	3.9506	3.4902	3.6142	3.6787	3.8963	4.0485	3.7206	4.0769	3.8046	3.9354	3.9084	3.8411	3.8554	3.7627
pos_511	metab_510	metab_510	-	-	378.109	2.7279	pos	-	-	-	-	-	-	0.0089	3.5036	4.5391	3.7823	3.1416	2.2168	2.1545	3.8885	2.399	3.6996	3.0874	3.0137	2.1962	2.2233	3.6637	3.8788	3.2967	3.4883	2.3645	3.7283	2.6291	3.3373	3.8301	2.8409	3.4092	4.3734	3.7951	4.0362	4.3117	4.0142	4.2697	4.1973	4.2112	3.9677	3.8833	3.9217
pos_512	metab_511	metab_511	-	-	324.106	2.7491	pos	-	-	-	-	-	-	0.0156	3.6149	3.6187	3.6837	2.7428	3.7582	2.7556	4.2485	4.03	3.4642	3.4847	3.588	2.7975	3.8011	4.4389	4.2609	4.3216	3.9038	4.4326	4.5383	4.1426	4.71	3.0369	4.2693	4.5876	3.7903	4.036	4.0463	3.9683	3.7614	3.7964	3.8968	3.8135	4.238	4.0566	4.1517
pos_513	metab_512	metab_512	-	-	219.174	2.7491	pos	-	-	-	-	-	-	0.0179	2.5226	3.1416	2.4998	2.3691	2.655	2.3818	2.5199	2.6269	2.6423	2.5433	3.3944	2.4841	2.4508	3.2865	3.2473	3.3109	2.5573	2.6556	2.9635	2.8691	3.3224	3.7576	2.5328	2.8822	4.153	4.6209	4.4447	4.2105	4.5897	4.3569	4.4762	4.4207	4.068	3.9167	3.944
pos_514	metab_513	metab_513	-	-	287.069	2.7491	pos	-	-	-	-	-	-	0.0152	3.7064	3.7746	3.9939	2.4341	2.5095	2.4469	3.2931	3.923	3.4171	3.8057	4.0028	3.2806	3.5386	4.0783	3.9595	3.9716	3.7723	4.2912	4.1853	3.9634	3.6288	3.7753	3.7516	3.9415	3.4498	3.3161	3.5543	3.5911	3.1273	3.4074	3.3838	3.2845	3.9441	3.7918	3.857
pos_515	metab_514	metab_514	-	-	139.111	2.8107	pos	-	-	-	-	-	-	0.0058	3.8467	4.1782	3.7199	3.6335	3.8421	3.4778	3.9406	3.9912	3.9979	4.0347	4.2013	3.9265	3.806	4.1583	4.172	4.1439	3.9137	3.9403	4.1249	4.0641	4.168	4.1254	3.828	4.0838	4.1742	4.5942	4.4438	4.2555	4.6444	4.3688	4.4492	4.4437	4.2791	4.24	4.2158
pos_516	metab_515	metab_515	-	-	324.064	2.79	pos	-	-	-	-	-	-	0.0046	4.1167	4.4082	3.9879	3.5685	3.8528	3.198	4.238	4.3164	4.251	4.2135	4.3893	4.0015	3.7519	4.4374	4.349	4.4113	4.1678	4.0348	4.2699	4.1288	4.3373	4.3283	3.8222	4.3069	4.3086	3.8844	3.8168	3.9707	4.2832	4.1705	4.3114	4.2275	4.2656	4.297	4.3092
pos_517	metab_516	metab_516	-	-	167.106	2.832	pos	-	-	-	-	-	-	0.0039	4.4404	4.5982	4.4171	4.3623	4.4327	4.3515	4.4639	4.5651	4.5764	4.5796	4.7471	4.4308	4.4719	4.766	4.7783	4.7245	4.497	4.5834	4.6815	4.6005	4.647	4.6612	4.5072	4.6754	4.7149	5.1066	5.0162	4.7848	5.1006	4.8857	4.9808	4.9411	4.8026	4.7555	4.7616
pos_518	metab_517	metab_517	-	-	309.13	2.79	pos	-	-	-	-	-	-	0.0108	2.5295	3.9999	2.5582	2.3759	2.4963	2.3887	2.5267	3.7941	2.6945	2.5502	2.6744	2.4306	2.4577	3.5442	3.3641	3.3524	2.8312	3.4781	3.3897	3.7293	3.7111	3.9397	2.5397	3.6558	2.8393	4.1059	4.1847	3.4099	4.3829	3.8779	4.1025	3.9569	3.9018	3.8014	3.823
pos_519	metab_518	metab_518	-	-	238.106	2.7705	pos	-	-	-	-	-	-	0.0155	3.5425	4.019	3.1975	2.9469	3.3122	2.711	3.3421	3.8921	3.7797	3.588	4.0929	3.1505	3.134	4.0727	4.0102	3.9996	3.8873	3.9248	4.1949	3.7912	3.6915	4.2074	3.5541	3.8692	3.1844	4.0603	4.0871	3.3102	4.2406	3.5849	4.038	3.9822	4.0441	3.871	3.9546
pos_520	metab_519	metab_519	-	-	348.146	2.8107	pos	-	-	-	-	-	-	0.0068	2.9483	4.0191	2.5144	2.3836	2.4589	2.3964	2.8949	3.539	3.381	3.5411	3.8159	2.4383	2.4654	4.2171	4.0619	4.0488	3.5975	3.8429	4.0023	3.7656	4.1165	4.3019	3.2074	4.0858	3.2909	4.467	4.3606	3.6288	4.1226	4.0239	4.2323	4.0953	4.0423	4.0571	3.9894
pos_521	metab_520	metab_520	-	-	169.122	2.832	pos	-	-	-	-	-	-	0.0055	3.7628	4.2297	3.6055	3.1914	3.7408	3.2389	4.0052	4.1584	4.1271	3.7758	4.564	3.6664	3.6359	4.2124	4.1283	4.1742	3.8609	3.8295	4.3083	3.8837	4.0935	3.8813	3.6482	4.1533	4.1853	4.5913	4.6966	4.1322	4.6737	4.3473	4.4951	4.4683	4.2853	4.2739	4.2303
pos_522	metab_521	metab_521	-	-	257.174	2.7491	pos	-	-	-	-	-	-	0.0103	3.5602	4.1795	2.9568	2.8902	2.804	2.7413	3.7846	3.9578	3.309	3.1485	4.1996	3.0954	2.8105	4.5454	4.3174	4.4413	3.6743	3.8112	4.1152	3.668	4.0145	4.3566	3.0002	3.9696	3.6649	4.2953	4.1704	3.9253	4.4435	4.1219	4.2483	4.1691	4.2476	4.1972	4.1266
pos_523	metab_522	metab_522	-	-	403.195	2.7279	pos	-	-	-	-	-	-	0.0118	2.9294	3.6386	2.8663	2.7353	2.8108	2.7481	3.0562	3.5379	2.8837	3.422	3.833	2.7901	2.8173	4.1181	3.9727	4.0699	3.3206	3.3367	3.6813	3.7214	3.7409	4.1085	2.9881	3.8568	4.0822	4.6166	4.42	4.2458	4.581	4.3455	4.4364	4.4156	4.1513	4.0386	4.0316
pos_524	metab_523	metab_523	-	-	268.153	2.8731	pos	-	-	-	-	-	-	0.005	4.1906	4.5648	4.3143	3.6858	4.1221	3.0857	4.3198	4.5571	4.2339	4.4029	4.7532	3.7022	4.032	4.7923	4.752	4.7312	4.6177	4.8241	4.8016	4.8297	4.7864	4.8663	4.4514	4.821	4.263	4.7114	4.6908	4.5696	4.7484	4.5177	4.5918	4.5464	4.6928	4.6494	4.6846
pos_525	metab_524	metab_524	-	-	173.132	2.7279	pos	-	-	-	-	-	-	0.0034	4.0317	4.4623	3.8814	2.8794	3.7783	2.9742	4.0219	4.3988	4.1037	4.1369	4.5041	3.6197	3.6333	4.6486	4.6246	4.5699	4.0375	4.4252	4.5243	4.4363	4.4989	4.6639	4.1116	4.5677	4.3497	4.8963	4.8119	4.4653	4.8184	4.6155	4.7185	4.6742	4.5864	4.5563	4.5467
pos_526	metab_525	metab_525	-	-	326.08	2.6879	pos	-	-	-	-	-	-	0.009	3.9582	4.1742	4.1271	3.0634	4.0371	3.0995	3.9596	4.2914	4.0529	4.0773	4.3881	3.6823	3.9217	4.3622	4.3439	4.2937	4.2633	4.3513	4.3071	4.4309	4.2478	4.2259	4.161	4.294	4.0951	4.2176	4.3257	4.0426	4.2854	4.1379	4.2137	4.1751	4.3451	4.3419	4.2809
pos_527	metab_526	metab_526	-	-	267.101	2.8933	pos	-	-	-	-	-	-	0.0067	3.7408	4.5041	4.0945	3.0167	3.9318	2.3002	4.2719	4.3423	3.309	3.9797	4.5117	3.9272	4.2096	4.7405	4.6145	4.6352	4.1014	4.5876	4.4409	4.5525	4.5108	2.5809	4.0825	4.5388	3.9435	4.4214	4.2493	4.0336	4.2294	4.1007	4.2443	4.1087	4.3972	4.42	4.4505
pos_528	metab_527	metab_527	-	-	380.19	2.9343	pos	-	-	-	-	-	-	0.0053	4.4566	4.4854	4.545	3.8546	4.151	4.774	4.4338	4.3717	4.3812	4.2875	4.6722	4.1356	4.0938	4.6331	4.6156	4.4688	4.4522	4.3968	4.4783	4.4633	4.69	4.3035	3.9765	4.5615	4.7335	5.2197	5.1353	4.6853	5.1004	4.8997	5.0048	5.0108	4.7929	4.7337	4.7489
pos_530	metab_529	metab_529	-	-	427.156	2.9537	pos	-	-	-	-	-	-	0.007	2.8984	4.037	2.8756	2.7445	2.82	2.7573	2.8956	3.5613	4.0858	3.536	3.7779	2.7993	3.2296	4.4309	4.5647	4.2524	2.9332	2.9683	4.7433	3.783	4.0004	4.1129	3.1705	4.2257	3.6431	4.7412	4.5899	3.9318	4.5609	4.2157	4.4009	4.4191	4.3378	4.3451	4.3991
pos_531	metab_530	metab_530	-	-	385.146	2.9343	pos	-	-	-	-	-	-	0.0044	3.7778	4.4496	4.1575	3.1923	3.9605	3.2051	3.7962	4.2909	4.0941	3.8798	4.6243	3.831	4.101	4.8251	4.7154	4.6576	4.2243	4.6144	4.7185	4.424	4.5153	4.1687	4.0113	4.6433	3.9622	4.9119	4.6889	4.2118	4.694	4.3129	4.5274	4.495	4.6262	4.572	4.6056
pos_532	metab_531	metab_531	-	-	473.198	2.9738	pos	-	-	-	-	-	-	0.005	4.4678	4.9757	4.1401	3.497	4.051	3.5098	4.6935	4.983	4.5763	3.6718	5.2681	3.7746	3.579	4.8159	4.8655	4.7242	4.5549	4.5323	5.2426	4.557	4.9701	4.4761	3.8574	5.0802	4.6435	5.4137	5.3972	4.8073	5.5406	4.9266	5.1056	5.0804	4.9573	4.8971	4.9017
pos_533	metab_532	metab_532	-	-	275.075	2.9738	pos	-	-	-	-	-	-	0.0041	3.9906	4.1039	3.492	2.3242	3.6179	2.337	4.0713	4.2765	3.732	2.4984	4.3338	2.3788	2.4059	3.8752	3.6567	3.7825	3.8767	3.4747	4.2926	3.8257	4.1564	3.8254	2.4879	4.1423	4.0582	4.5415	4.5706	4.1873	4.7319	4.2535	4.4088	4.4074	4.1364	4.0975	4.1185
pos_534	metab_533	metab_533	-	-	139.111	2.994	pos	-	-	-	-	-	-	0.0074	3.2581	3.3326	2.8527	2.6288	3.2518	2.9382	3.2728	3.348	3.3129	3.3093	3.458	3.1835	3.1057	3.7262	3.5925	3.5166	3.2048	3.1706	3.2722	3.2473	3.32	3.8057	3.1157	3.4764	3.3841	4.1002	3.6433	3.4363	3.7204	3.5318	3.5696	3.5989	3.5225	3.4565	3.4635
pos_535	metab_534	metab_534	-	-	262.164	2.9738	pos	-	-	-	-	-	-	0.008	3.3144	3.8904	3.2013	2.6987	3.1626	2.7115	3.5061	3.7312	3.4605	3.6805	4.1506	2.7637	2.9854	4.2346	4.2807	4.2116	3.3511	3.8733	4.0127	3.9457	4.1064	3.9696	2.8628	4.1743	3.8331	4.457	4.315	4.0667	4.3659	4.0483	4.2605	4.1909	4.1268	4.0954	4.0843
pos_536	metab_535	metab_535	-	-	379.21	3.0154	pos	-	-	-	-	-	-	0.0073	3.7363	4.3558	3.642	3.36	3.9433	3.5445	4.4091	4.3131	3.5963	4.69	4.5475	3.5972	3.3717	4.6102	4.7028	4.5496	4.2162	4.5691	4.1741	4.2753	4.409	5.2903	4.5115	4.3602	3.8093	4.2143	3.6118	3.8638	4.1229	4.0264	3.9604	3.8935	4.5714	4.5258	4.4985
pos_537	metab_536	metab_536	-	-	251.129	3.0355	pos	-	-	-	-	-	-	0.0052	3.9398	4.476	3.9544	2.5724	3.806	2.5853	3.9329	4.3154	3.9277	3.8787	4.4576	3.232	3.5639	4.5781	4.5425	4.4639	4.2408	4.406	4.5055	4.4572	4.5222	4.6146	3.9528	4.577	4.2523	4.7765	4.7642	4.4247	4.6903	4.4907	4.5851	4.5459	4.5295	4.4951	4.4734
pos_538	metab_537	metab_537	-	-	336.237	3.0763	pos	-	-	-	-	-	-	0.0135	3.4249	3.991	3.0815	2.9172	3.1743	2.6954	3.4054	3.7626	3.7538	3.6429	4.0955	3.1518	2.9319	4.0822	4.0288	3.9949	3.6233	3.4384	3.9074	3.5448	3.7763	3.8289	3.5151	3.7801	3.6351	4.6024	4.6284	4.0499	4.5824	4.3401	4.4422	4.436	4.2109	4.1705	4.0706
pos_539	metab_538	metab_538	-	-	340.174	3.1164	pos	-	-	-	-	-	-	0.0066	3.7263	4.3926	3.5135	2.7232	3.5234	2.7361	3.5286	3.9571	3.6975	3.8683	4.3317	3.1055	3.3079	4.9816	4.6462	4.7345	3.7486	3.8719	4.4605	4.1596	4.1653	4.7807	3.5528	4.0815	3.674	4.3582	4.2209	3.8502	4.128	3.8639	3.9676	3.8836	4.2375	4.1703	4.2259
pos_540	metab_539	metab_539	-	-	376.176	3.1164	pos	-	-	-	-	-	-	0.021	2.5469	3.5602	2.6875	2.3933	2.4686	2.4061	2.5441	3.2496	2.5414	3.2425	3.312	2.7043	2.4966	4.1657	4.0054	4.0881	3.096	3.8037	3.9692	3.5074	3.7163	4.1491	3.0898	3.7402	2.5755	4.541	4.2279	2.6531	3.8329	3.4989	3.8838	3.8101	3.7572	3.7978	3.9345
pos_541	metab_540	metab_540	-	-	369.063	3.1164	pos	-	-	-	-	-	-	0.014	3.8295	3.4061	3.4738	2.9511	3.5879	3.8161	3.3925	3.625	2.9636	3.7688	3.6222	2.9302	3.2778	4.245	4.1007	4.2205	3.4644	3.9213	4.2999	3.4217	3.564	4.3946	3.6869	3.9812	3.2608	2.7614	3.3826	2.9391	2.7704	2.6836	2.7194	2.803	3.8111	3.7862	3.8829
pos_542	metab_541	metab_541	-	-	515.201	3.1368	pos	-	-	-	-	-	-	0.0156	1.1747	4.8042	1.1534	3.8852	1.1019	1.0444	4.2453	4.2481	2.6322	2.9189	4.7545	1.0828	1.1078	4.0156	4.0123	4.0218	2.3021	3.1538	3.4263	3.3043	3.4966	3.7449	2.6774	3.4361	3.0915	3.9627	4.3345	2.7108	4.7162	4.0444	4.2115	4.2243	4.0712	3.9418	3.9591
pos_543	metab_542	metab_542	-	-	156.065	3.1575	pos	-	-	-	-	-	-	0.0031	4.386	4.6226	3.9969	3.329	3.7004	3.3154	4.1789	4.3663	4.1837	3.9971	4.3394	3.7683	3.6057	4.3228	4.3613	4.3034	4.3065	3.8285	4.6516	4.1945	4.2426	4.0512	4.1309	4.4558	4.146	4.6774	4.6059	4.3671	4.5819	4.3642	4.4547	4.408	4.3727	4.3627	4.3559
pos_544	metab_543	metab_543	-	-	153.054	3.1575	pos	-	-	-	-	-	-	0.009	3.2867	3.758	3.3328	2.9321	3.3277	2.596	3.1722	3.7005	3.2588	3.5849	3.7058	3.095	3.0592	3.9959	4.0001	3.8908	3.6407	4.03	3.8907	3.9487	3.9343	4.2414	3.6365	3.9909	3.5243	4.1565	4.0286	3.7359	4.0918	3.8369	3.9053	3.8862	3.9278	3.9166	3.9001
pos_545	metab_544	metab_544	-	-	274.164	3.1575	pos	-	-	-	-	-	-	0.0087	3.6029	4.3014	3.6533	2.6489	3.7734	2.6618	3.4593	4.1098	3.4613	3.5208	4.0571	2.7037	3.4096	4.3172	4.2028	4.1117	3.6775	3.9305	4.1663	4.2162	4.4042	4.5032	3.1829	4.3828	3.4446	4.7359	4.6411	3.8477	4.8032	4.3363	4.509	4.4237	4.3408	4.279	4.271
pos_546	metab_545	metab_545	-	-	226.143	3.1787	pos	-	-	-	-	-	-	0.0033	4.3487	4.7982	4.3375	3.6155	4.1342	3.1977	4.3496	4.7153	4.7527	4.7559	5.0778	4.3906	4.4556	5.0402	5.0782	4.999	4.5143	4.656	4.8742	4.7616	4.6834	4.8604	4.4107	4.8016	4.7888	5.1531	5.1432	4.8803	5.1937	4.911	5.0044	4.9667	4.9215	4.899	4.9102
pos_547	metab_546	metab_546	-	-	284.185	3.2001	pos	-	-	-	-	-	-	0.0052	3.397	4.4309	3.5854	3.1769	3.4062	3.4359	3.7036	3.3395	3.3552	3.3724	3.7548	3.3322	3.4256	3.7956	4.027	3.929	3.5711	3.5617	3.9792	3.9322	3.9458	3.8159	3.2957	3.8632	3.8172	4.4677	4.1596	3.7154	4.7419	4.2837	4.186	4.4084	4.1733	4.1266	4.1415
pos_548	metab_547	metab_547	-	-	933.266	3.2001	pos	-	-	-	-	-	-	0.0073	2.7625	4.8107	3.8222	2.6087	2.6841	2.6215	3.6118	4.4337	2.9948	2.7832	4.4632	2.6634	3.6692	5.0921	4.8402	4.8523	4.2373	4.1812	4.3718	5.0338	4.8076	3.7659	3.8532	4.8414	2.7911	5.0909	4.5535	3.6568	4.306	4.3133	4.5459	4.3683	4.6057	4.6064	4.6429
pos_549	metab_548	metab_548	-	-	320.188	3.2001	pos	-	-	-	-	-	-	0.004	2.8941	4.4856	2.8713	2.7402	2.8157	2.753	2.8913	3.6836	3.3341	2.948	3.0392	2.795	2.8222	4.5414	4.4382	4.5109	3.8569	3.4763	4.4551	4.2535	4.3691	4.6731	4.021	4.4216	4.3563	4.7103	4.3889	3.51	3.4785	4.4467	4.4578	4.4208	4.4491	4.4586	4.4623
pos_550	metab_549	metab_549	-	-	233.12	3.2001	pos	-	-	-	-	-	-	0.007	3.0679	3.768	3.0231	2.5998	2.6753	2.6126	3.1339	3.5363	2.7481	2.8398	3.4609	2.6546	2.6817	3.6596	3.6612	3.664	3.4419	3.5597	3.8103	3.7277	3.6877	3.7547	3.2812	3.7577	3.5036	4.0904	4.0222	3.5998	3.9957	3.6671	3.8551	3.6693	3.6599	3.5978	3.6172
pos_551	metab_550	metab_550	-	-	430.242	3.1787	pos	-	-	-	-	-	-	0.0188	3.7201	4.1222	3.5593	3.8776	3.6293	3.6481	3.8439	4.108	3.6921	3.569	4.1095	3.6496	3.6355	4.4657	4.4258	4.4434	3.8833	3.9656	4.1811	4.0393	4.1351	4.1882	3.6699	4.1918	3.9567	4.5553	4.3184	4.1375	4.4504	4.1852	4.3495	4.175	4.2127	4.2033	4.332
pos_552	metab_551	metab_551	-	-	411.19	3.2411	pos	-	-	-	-	-	-	0.0026	2.7034	2.8124	2.6806	2.5497	2.6251	2.5625	2.7006	2.8078	2.6979	2.8467	3.6946	3.3725	2.8654	4.3502	4.0943	4.1923	2.7382	3.4002	2.9391	3.0204	2.8337	5.3321	2.7136	2.8496	2.7517	4.4037	4.4686	3.865	4.5224	3.8694	4.0777	4.1979	4.3521	4.3664	4.3576
pos_554	metab_552	metab_552	-	-	268.085	3.2626	pos	-	-	-	-	-	-	0.0094	4.6518	4.6309	4.5793	4.0782	4.5539	4.1032	4.5228	4.6601	4.677	4.7618	4.8812	4.4181	4.5308	4.7145	4.658	4.7313	4.6434	4.5475	4.7602	4.6264	4.6211	4.6399	4.7248	4.6803	4.6934	4.7934	4.855	4.8142	4.903	4.8358	4.8832	4.9053	4.8004	4.7319	4.8074
pos_555	metab_553	metab_553	-	-	261.122	3.2626	pos	-	-	-	-	-	-	0.0069	4.1969	3.9493	3.886	2.8171	4.3234	2.8808	4.3259	4.6682	3.6833	3.5893	5.1184	3.0891	3.0236	3.4944	3.659	3.9987	3.9873	4.8512	4.0933	4.0878	4.0704	3.4656	3.2997	4.2749	3.6732	3.9915	3.8907	3.8837	4.5195	3.7091	3.9163	3.7098	4.2797	4.2224	4.302
pos_556	metab_554	metab_554	-	-	371.169	3.3245	pos	-	-	-	-	-	-	0.004	4.1986	4.7861	4.2251	3.5271	3.8766	3.54	4.081	4.7344	4.499	4.2545	4.7723	3.582	3.7949	4.7823	4.8019	4.6843	4.3034	4.5875	4.8562	4.8989	4.8511	4.4165	4.4383	4.9472	4.2612	5.1089	5.0273	4.2206	5.0857	4.64	4.8655	4.7801	4.7475	4.7324	4.7007
pos_557	metab_555	metab_555	-	-	301.211	3.3245	pos	-	-	-	-	-	-	0.0113	3.0305	3.9808	3.2132	2.4317	2.507	2.4445	3.2683	3.8995	3.3475	3.4439	3.9856	2.4864	2.5135	3.9623	4.0118	3.918	3.752	4.178	4.1345	4.0794	3.9705	4.1514	3.4853	4.0881	3.2456	3.9063	4.0482	3.4948	4.0114	3.5439	3.7356	3.6457	3.9617	3.9226	3.8846
pos_558	metab_556	metab_556	-	-	147.116	3.3245	pos	-	-	-	-	-	-	0.006	4.0118	4.2562	3.9006	3.4014	3.8412	3.018	3.9605	4.1658	4.0545	4.1398	4.3391	3.7252	3.6178	4.3178	4.3505	4.2569	4.0716	4.106	4.3251	4.2158	4.2516	4.4509	4.0799	4.3105	4.1734	4.7232	4.5542	4.32	4.6288	4.3936	4.5121	4.5015	4.3198	4.3268	4.3586
pos_559	metab_557	metab_557	-	-	429.172	3.3447	pos	-	-	-	-	-	-	0.0092	4.5652	4.8736	4.1013	3.0964	4.3809	3.1092	4.5031	4.88	4.7891	4.4663	5.1636	3.8155	3.1784	4.7312	4.7636	4.6601	4.5538	4.453	4.9914	4.6437	4.8804	4.3091	4.5067	4.951	4.6076	5.2539	5.2925	4.5124	5.3921	4.8151	5.0481	5.0297	4.8814	4.7695	4.8437
pos_561	metab_559	metab_559	-	-	281.21	3.3447	pos	-	-	-	-	-	-	0.0323	2.3941	3.6921	2.3714	2.6618	2.316	2.2535	2.3914	2.4984	3.1813	3.2501	3.2694	2.2953	2.3224	3.9503	3.9663	3.7165	2.5856	3.1389	4.114	2.7708	2.863	4.0374	3.0036	3.4326	3.4539	4.2423	4.0308	3.1672	2.6513	3.8076	3.9032	3.8004	3.8119	3.7266	3.6336
pos_562	metab_560	metab_560	-	-	382.206	3.3856	pos	-	-	-	-	-	-	0.0159	3.116	3.8606	2.6553	2.5244	2.5998	2.5372	3.4116	3.8517	3.5497	2.6988	4.0913	2.5791	2.9439	4.2166	3.8724	3.9529	3.7267	3.946	3.9995	3.807	4.4547	3.6962	2.6883	4.3256	4.2346	4.4806	4.9463	3.8433	4.3166	4.1484	4.2715	4.3285	4.1043	4.0539	4.2249
pos_563	metab_561	metab_561	-	-	290.195	3.3856	pos	-	-	-	-	-	-	0.0059	3.9765	4.2144	3.4008	3.5784	3.5574	3.3312	3.9363	4.1756	4.2305	4.2871	4.5318	3.6322	3.9121	4.3238	4.4121	4.3167	3.9539	4.1688	4.2274	3.9929	4.1412	4.2812	3.9595	4.1279	4.0828	4.5855	4.5518	4.3009	4.6709	4.4306	4.4734	4.4834	4.3346	4.3207	4.2734
pos_564	metab_562	metab_562	-	-	375.129	3.3856	pos	-	-	-	-	-	-	0.0313	3.2727	2.0898	1.1938	1.0723	3.2527	1.0841	3.6207	4.2756	1.2101	3.1851	4.3934	1.1228	1.148	1.6942	1.3895	1.6026	3.4597	4.1271	1.3565	4.1561	3.9873	4.7252	3.2736	4.0925	1.2423	2.7076	2.7303	3.5679	4.5706	2.4838	1.9814	1.8649	3.0533	3.3136	3.2746
pos_565	metab_563	metab_563	-	-	191.106	3.3856	pos	-	-	-	-	-	-	0.004	4.0009	4.3361	3.7001	3.3774	3.7655	3.3784	3.9842	4.3029	4.1282	4.1917	4.4001	3.6794	3.9341	4.4984	4.5145	4.4405	4.0641	4.2358	4.4369	4.3827	4.4403	4.6148	4.1445	4.4781	4.1559	4.917	4.7839	4.3452	4.8657	4.5496	4.6825	4.6776	4.5436	4.5249	4.4948
pos_567	metab_565	metab_565	-	-	223.168	3.4672	pos	-	-	-	-	-	-	0.0062	4.17	4.6262	4.1265	3.8514	3.8197	3.5221	4.2218	4.397	4.3387	4.1776	4.5877	4.1111	4.1144	4.7979	4.7164	4.6803	4.347	4.4464	4.741	4.4928	4.5293	4.9043	4.0779	4.6454	4.4458	4.894	4.8807	4.4523	4.7672	4.618	4.7351	4.7015	4.6786	4.603	4.6188
pos_568	metab_566	metab_566	-	-	334.221	3.4474	pos	-	-	-	-	-	-	0.0081	4.4086	4.4725	4.1873	4.3625	4.2016	4.3456	4.404	4.392	4.3787	4.3086	4.4643	4.3089	4.3231	4.57	4.5708	4.4145	4.4975	4.157	4.7013	4.2841	4.3677	4.4145	4.2574	4.5069	4.2871	4.7795	4.7243	4.351	4.6964	4.5125	4.5606	4.5038	4.4733	4.3972	4.3889
pos_569	metab_567	metab_567	-	-	213.148	3.4672	pos	-	-	-	-	-	-	0.0031	4.7549	4.9868	4.5604	3.792	4.7785	4.1153	4.8378	5.072	4.6114	4.5958	5.2293	4.2002	4.1665	4.9321	4.9217	4.8401	4.7568	4.8752	5.0567	4.8322	4.9471	4.8238	4.7174	5.0149	4.6465	5.2042	5.2992	4.7934	5.5336	4.9379	5.0686	5.043	4.9339	4.9322	4.9197
pos_570	Glycitein	metab_568	LMPK12050104;HMDB0005781	C14536	285.075	3.4474	pos	M+H, M+Na	C16H12O5	85.6	-	-3.8838	40957-83-3	0.0059	4.0225	4.339	3.8724	3.1411	3.9685	2.7628	4.2786	4.2758	4.2109	4.061	4.5889	3.8524	4.1585	4.6509	4.5565	4.6143	5.5562	4.8177	4.3185	4.713	4.6506	6.9145	4.1571	4.6609	4.3892	4.2062	4.6737	3.787	4.4081	4.3281	4.2788	4.3125	6.0273	5.9972	5.9354
pos_571	Caryophyllene epoxide	metab_569	HMDB0036789	C16908	221.189	3.4882	pos	M+H-H2O, M+H	C15H24O	53.4	-	-2.89374	-	0.0122	2.0797	2.2638	2.4013	1.9271	2.0019	1.9398	2.077	2.1836	2.0743	2.1003	3.0631	1.9814	2.0084	3.0837	3.3133	2.2693	2.1143	2.2078	2.7365	2.2088	2.9013	3.3303	2.0898	2.7275	4.082	4.5869	4.4552	3.9641	4.4283	4.2011	4.3489	4.3368	3.837	3.8717	3.7838
pos_572	metab_570	metab_570	-	-	249.148	3.4882	pos	-	-	-	-	-	-	0.012	3.4409	4.2168	3.4699	2.8261	2.9016	2.839	3.3981	3.9206	3.6485	3.7271	3.8388	3.3229	2.9081	4.1507	4.1926	4.0732	3.6392	3.8403	4.2698	4.0177	4.0286	4.1306	3.7475	4.1067	3.9646	4.8149	4.6743	4.1192	4.6175	4.3357	4.4693	4.3833	4.2069	4.2015	4.0838
pos_573	metab_571	metab_571	-	-	306.169	3.5286	pos	-	-	-	-	-	-	0.0083	3.7709	3.925	3.783	3.8399	3.7473	3.8563	4.0269	3.9312	3.7755	3.8388	4.1473	3.7454	3.7706	3.934	3.9832	3.904	3.9824	3.8959	4.0415	3.9771	4.1595	4.2128	3.9301	4.1982	3.8784	4.3808	4.1189	4.0737	4.1853	4.0225	4.1034	4.1246	4.0143	3.9428	4.0281
pos_574	metab_572	metab_572	-	-	410.289	3.5286	pos	-	-	-	-	-	-	0.0099	3.0987	4.0569	2.6983	2.2765	2.3517	2.2892	3.1748	3.7141	4.0912	4.5031	4.2723	2.3311	2.3582	4.0631	4.4346	4.0061	3.7176	3.9345	3.8769	3.7144	2.56	3.9947	3.9588	3.1058	2.4585	2.6781	2.6577	2.5361	2.6871	2.6004	2.6361	2.6242	3.7587	3.671	3.7237
pos_575	metab_573	metab_573	-	-	267.195	3.5494	pos	-	-	-	-	-	-	0.0108	3.4338	4.2507	2.703	2.7334	2.8804	2.5848	3.7633	4.0711	4.0989	4.0564	4.3812	2.6268	2.6578	4.3079	4.3518	4.2602	3.9948	3.962	4.3537	3.8435	4.2706	4.145	3.7064	4.3092	3.84	4.7152	4.7275	4.0131	4.5192	4.2217	4.4231	4.4071	4.285	4.2426	4.3148
pos_576	metab_574	metab_574	-	-	242.174	3.5699	pos	-	-	-	-	-	-	0.0049	4.4381	4.3734	4.3909	4.4906	4.4426	4.4823	4.4972	4.4601	4.4852	4.5053	4.5475	4.5173	4.4998	4.3208	4.4382	4.3661	4.5027	4.2432	4.488	4.3516	4.3742	4.3067	4.415	4.4118	4.4557	4.6153	4.6791	4.4676	4.558	4.4641	4.5113	4.4914	4.4327	4.4357	4.3856
pos_577	metab_575	metab_575	-	-	244.154	3.5699	pos	-	-	-	-	-	-	0.0293	2.3409	3.4238	2.2616	2.1311	2.2062	2.1439	2.2815	2.9449	2.2788	2.305	3.5813	2.1856	2.2127	3.6774	3.8008	3.4949	2.3189	3.1399	3.5688	2.6115	3.1483	3.6805	2.2944	3.495	2.5522	4.0708	4.0153	2.845	4.0121	3.1516	3.6591	3.4122	3.3991	3.6253	3.4867
pos_578	3-Hydroxytetradecanedioic acid	metab_576	HMDB0000394	-	239.163	3.5699	pos	M+H-2H2O, M+Na	C14H26O5	-	75.3	-3.37315	73179-89-2	0.0024	4.5526	4.9316	4.3626	3.8756	4.2587	3.6983	4.6724	4.7599	4.9363	4.8152	5.1843	4.3975	4.3545	4.9567	5.0717	4.9059	4.7846	4.4809	5.043	4.6735	4.8874	4.8993	4.6399	4.9727	4.865	5.5112	5.4868	4.9208	5.2925	5.137	5.2307	5.2254	5.037	5.0024	5.0211
pos_579	metab_577	metab_577	-	-	219.137	3.6107	pos	-	-	-	-	-	-	0.0042	4.0368	4.3671	3.8745	3.0135	3.7252	3.1113	4.0493	4.2787	4.1905	4.2598	4.4636	3.6943	3.8529	4.4294	4.4862	4.348	4.1212	4.235	4.428	4.1994	4.3857	4.5924	4.1008	4.4663	4.2012	4.9376	4.8696	4.3939	4.7349	4.5648	4.6644	4.6224	4.4958	4.4535	4.4683
pos_580	metab_578	metab_578	-	-	463.229	3.6107	pos	-	-	-	-	-	-	0.0025	4.5151	4.9411	4.0193	3.7436	3.8192	3.7564	4.6425	5.0251	4.0764	4.9558	5.268	4.2234	3.8256	5.4192	5.5646	5.3453	4.9307	5.1001	5.4497	5.0314	5.2483	5.5377	4.8536	5.1712	3.9263	4.9954	5.0125	4.3742	4.9706	4.4964	4.6302	4.6093	5.2025	5.1706	5.1798
pos_581	metab_579	metab_579	-	-	279.158	3.6524	pos	-	-	-	-	-	-	0.0031	4.0947	4.4286	4.04	3.4839	3.9751	3.5372	4.1019	4.4091	4.0959	4.2697	4.4858	3.9296	3.9465	4.5827	4.5918	4.4711	4.156	4.5789	4.5737	4.6192	4.555	4.6761	4.2341	4.6386	4.2953	4.9364	4.8457	4.478	4.8494	4.6083	4.7319	4.6906	4.5938	4.5712	4.5533
pos_582	metab_580	metab_580	-	-	387.161	3.6936	pos	-	-	-	-	-	-	0.0151	3.2329	4.1115	2.6411	3.3618	2.5856	2.523	3.9215	3.8717	3.5553	2.6846	4.4394	2.5649	2.8909	4.5588	4.3345	4.4666	3.0008	3.018	4.075	3.7915	3.4653	4.0249	2.6741	3.764	3.2033	3.5665	4.0814	2.7702	3.781	3.3751	3.3255	3.5026	4.0772	3.9594	3.9749
pos_583	metab_581	metab_581	-	-	514.227	3.6936	pos	-	-	-	-	-	-	0.0266	2.8692	3.8181	2.8464	2.7153	2.7908	2.7282	2.8664	3.3537	3.2165	3.7536	3.6406	2.7701	2.7973	4.5349	4.4147	4.2011	2.904	3.3374	3.9912	3.6153	3.7286	4.6882	3.0403	3.7334	2.8978	4.7708	4.6325	2.9756	4.0166	3.7899	4.054	3.8051	4.0616	3.9007	4.0334
pos_584	metab_582	metab_582	-	-	430.294	3.6734	pos	-	-	-	-	-	-	0.0065	4.5339	4.819	4.1859	4.2115	3.6619	4.18	4.0558	4.9922	4.8337	4.5111	4.7101	3.6928	3.3781	5.0474	5.0158	4.9563	4.4174	4.7785	4.606	4.5127	3.1777	5.4122	4.3792	4.2458	4.5829	4.9063	5.0814	4.3812	4.8569	4.4506	4.7366	4.5503	4.8166	4.7476	4.7531
pos_585	metab_583	metab_583	-	-	221.189	3.7146	pos	-	-	-	-	-	-	0.0148	2.3878	2.6818	2.3651	2.2345	2.3097	2.2472	2.3851	2.492	2.3823	2.4085	3.3131	2.289	2.3161	3.5176	3.4308	3.1381	2.4225	2.7791	2.9343	2.7023	3.4986	3.4918	2.4726	3.452	4.035	4.565	4.4399	3.909	4.3904	4.1584	4.3453	4.2079	3.9284	3.8303	3.8541
pos_586	metab_584	metab_584	-	-	281.174	3.7763	pos	-	-	-	-	-	-	0.0089	2.8459	4.1889	3.2575	2.6921	2.8817	2.7049	3.6364	3.7522	4.0498	3.9451	4.0563	3.1672	3.1102	4.3423	4.3714	4.3633	3.6677	3.8635	4.238	3.9937	4.0432	4.1491	3.5842	4.2298	4.1768	4.4584	4.4349	4.186	4.4266	4.4786	4.5812	4.5079	4.2106	4.1872	4.1972
pos_587	3-(5-Methyl-2-furanyl)butanal	metab_585	HMDB0036169	-	135.08	3.8378	pos	M+H-H2O, M+H	C9H12O2	-	56.3	-2.10862	31704-80-0	0.0054	3.9083	4.1368	3.8352	3.3134	3.5896	3.3987	4.0414	4.0863	3.9064	3.8236	3.9662	3.3165	3.5047	4.061	4.0964	4.0113	4.0903	3.8614	4.2359	3.9988	4.1286	4.2368	4.0206	4.1593	4.0192	4.6722	4.5473	4.1712	4.5797	4.3551	4.4529	4.4273	4.1895	4.2063	4.2483
pos_588	metab_586	metab_586	-	-	432.221	3.8378	pos	-	-	-	-	-	-	0.0106	4.1896	4.5351	3.8669	3.5868	3.6624	3.5996	4.3067	4.603	3.9353	3.9704	4.5972	3.6417	3.6689	4.3107	4.465	4.2069	4.3956	4.0193	4.6139	4.3185	4.441	4.394	4.4078	4.5514	4.2262	5.0551	5.0478	4.5289	5.1812	4.6982	4.8493	4.7913	4.5463	4.5472	4.5779
pos_589	metab_587	metab_587	-	-	295.164	3.8575	pos	-	-	-	-	-	-	0.0056	2.8097	3.6745	2.2772	2.1467	2.2218	2.1595	2.2971	3.2107	2.6272	4.2213	4.6274	4.6288	3.5058	5.3843	5.2598	5.2231	2.8075	3.4776	3.7952	2.5946	3.2947	4.0074	2.7314	3.5279	3.0782	4.5198	4.4525	3.9089	4.6235	4.2026	4.3837	4.1371	4.7536	4.7002	4.6868
pos_590	metab_588	metab_588	-	-	131.085	3.8378	pos	-	-	-	-	-	-	0.0025	3.4515	3.9991	3.2013	2.2273	2.3024	2.5243	3.6327	3.8007	3.7561	3.333	3.8628	3.2675	2.8608	3.9364	3.9586	3.933	3.7222	3.6301	3.9917	3.7577	3.8362	3.9526	3.5608	3.8918	3.796	4.3907	4.3473	3.8606	4.3019	4.0554	4.1735	4.1559	3.9382	3.9471	3.9474
pos_591	metab_589	metab_589	-	-	376.14	3.8378	pos	-	-	-	-	-	-	0.0016	4.1722	4.3621	4.2493	3.5253	4.2688	3.5381	4.2806	4.7267	4.337	4.4021	4.9377	3.5801	3.6368	4.2446	4.3686	4.2943	4.2069	4.7095	4.3808	4.671	4.5981	4.7582	4.2528	4.712	3.9082	4.2722	4.2895	4.2969	4.4923	4.053	4.3526	4.1479	4.338	4.343	4.3257
pos_592	metab_590	metab_590	-	-	338.159	3.8984	pos	-	-	-	-	-	-	0.0151	2.7832	3.7626	2.7603	2.6293	2.7048	2.6422	3.2451	3.6195	2.7777	3.107	3.7198	2.6841	2.7113	3.9165	4.0231	3.8098	3.4473	3.8873	4.0022	3.8459	3.8387	4.3053	3.3901	3.8082	3.0834	4.1166	4.2659	3.4654	4.2896	3.9436	3.9846	3.8199	3.9439	3.8867	3.7828
pos_593	metab_591	metab_591	-	-	239.163	3.9588	pos	-	-	-	-	-	-	0.0046	4.5578	4.8854	4.371	3.9316	4.1771	3.3255	4.6749	4.7904	4.8444	4.6628	5.0299	4.2357	4.2471	4.8043	4.9079	4.7734	4.7364	4.3575	5.0056	4.6548	4.7937	4.9337	4.6149	4.8745	4.6514	5.189	5.2718	4.7114	5.1536	4.8902	5.0265	4.994	4.8851	4.8368	4.8649
pos_594	metab_592	metab_592	-	-	221.189	3.9588	pos	-	-	-	-	-	-	0.0131	2.1338	2.2423	2.1111	1.9811	2.0559	1.9938	2.1311	2.2377	2.1284	2.1544	2.2781	2.0354	2.0624	2.3343	2.9355	2.3236	2.1684	2.2033	3.0598	2.263	2.5326	3.2171	2.1439	2.2793	3.843	4.3976	4.2954	3.7423	4.1621	4.0301	4.1143	4.0293	3.5094	3.5715	3.5675
pos_595	metab_593	metab_593	-	-	195.174	3.9997	pos	-	-	-	-	-	-	0.0106	2.911	3.7027	2.8021	2.6711	2.7466	2.6839	3.4518	3.4762	3.8865	2.8457	4.0298	2.9907	2.753	3.7182	3.7183	3.6079	2.9602	2.9602	3.8758	2.9548	3.6412	3.2175	2.8351	3.6467	3.5254	4.2458	4.4658	3.4349	4.1467	3.8196	3.9637	4.0551	3.8061	3.7302	3.8364
pos_596	metab_594	metab_594	-	-	277.146	4.0208	pos	-	-	-	-	-	-	0.0102	3.4336	3.6427	3.9509	2.598	2.9668	2.6108	3.8116	4.1521	3.9808	4.1328	4.5442	2.6528	3.9117	4.381	4.5609	4.2759	4.0355	3.4679	4.421	4.5102	3.7282	4.7758	3.8046	4.2281	3.5767	4.1318	4.5069	2.8582	4.3431	3.7843	4.0095	3.8691	4.2523	4.1926	4.183
pos_597	metab_595	metab_595	-	-	221.153	4.0408	pos	-	-	-	-	-	-	0.001	4.7175	5.1913	4.6132	4.1968	4.4559	4.1732	4.812	4.9596	5.0477	4.8608	5.1365	4.5473	4.4869	5.1199	5.1437	5.0622	4.9221	4.8133	5.2483	4.969	5.0718	5.2962	4.8313	5.153	5.0125	5.6229	5.6338	5.1237	5.4472	5.3081	5.4058	5.4008	5.1939	5.1802	5.184
pos_600	metab_597	metab_597	-	-	181.085	3.9997	pos	-	-	-	-	-	-	0.0136	2.5127	3.3361	2.8226	1.9439	2.0187	1.9566	2.5227	3.2086	3.0295	2.378	3.5014	1.9982	2.0251	3.3639	3.5315	3.0936	2.1311	2.95	3.4743	2.9152	3.1561	3.6659	2.8407	3.5446	2.4524	3.7625	3.878	2.9897	3.8089	3.419	3.4816	3.402	3.2772	3.373	3.3172
pos_601	metab_598	metab_598	-	-	286.164	4.1425	pos	-	-	-	-	-	-	0.0313	4.0356	3.3373	3.3738	2.7139	3.7131	2.7267	4.2209	3.5109	2.8623	3.0082	4.0871	2.7687	2.7958	3.3306	3.3739	3.2769	3.4846	3.2908	3.1647	3.1857	3.5747	3.5813	2.8779	3.5294	2.9176	3.938	3.5691	3.3317	4.2846	3.4822	3.6289	3.4492	3.051	3.2958	3.2761
pos_603	metab_599	metab_599	-	-	539.284	4.203	pos	-	-	-	-	-	-	0.0097	3.1011	3.659	3.2345	3.4861	3.3369	2.9599	3.0983	4.06	3.3834	3.1218	3.5549	3.0019	3.0291	5.2865	4.989	5.1215	4.2593	4.8261	4.5125	3.5733	3.2316	5.3411	3.4512	4.2011	3.1297	4.439	4.8869	4.0084	3.9134	3.813	3.8073	4.0103	4.5002	4.5371	4.621
pos_604	metab_600	metab_600	-	-	433.205	4.203	pos	-	-	-	-	-	-	0.0056	3.8986	4.7216	3.7609	2.4524	2.5277	2.4652	3.7049	3.5582	4.3517	3.7177	2.751	3.4331	3.4169	4.3362	4.3229	4.2544	4.1232	2.6759	4.7244	3.9205	4.1662	4.352	3.8032	4.4664	4.5336	5.2747	5.201	4.5732	4.5876	4.8829	4.9725	4.9786	4.6382	4.5849	4.5835
pos_605	metab_601	metab_601	-	-	290.141	4.2442	pos	-	-	-	-	-	-	0.0034	2.1245	3.5229	2.1018	1.9718	2.0466	1.9845	2.1217	3.7898	4.0952	3.7102	4.4117	2.0261	3.8434	4.0847	4.2501	4.0941	3.9746	2.6509	4.4069	3.4738	2.6814	5.0034	3.8955	3.7181	2.8508	3.9147	4.5475	2.2303	4.4024	3.5687	3.9836	3.965	4.2097	4.1851	4.1707
pos_606	metab_602	metab_602	-	-	307.2	4.2442	pos	-	-	-	-	-	-	0.0083	4.3013	4.213	3.8192	2.9019	2.9774	2.9148	4.1236	4.3519	3.9019	4.0925	4.8502	3.2942	3.4524	4.7167	4.7616	4.5783	4.4824	4.4882	4.7998	4.3853	4.5435	4.5535	4.3714	4.5949	3.8513	4.5501	4.5449	3.8236	4.4996	4.1624	4.3224	4.1852	4.6363	4.5767	4.5312
pos_607	metab_603	metab_603	-	-	216.195	4.2843	pos	-	-	-	-	-	-	0.0053	4.4031	4.1967	4.3961	4.5682	4.5068	4.5674	4.4945	4.337	4.396	4.431	4.2507	4.5309	4.5643	4.2049	4.1937	4.278	4.3655	4.1981	4.1983	4.3083	4.2109	4.0755	4.3874	4.1755	4.4466	4.1594	4.1709	4.3905	4.2715	4.3736	4.3181	4.3373	4.317	4.3306	4.292
pos_608	metab_604	metab_604	-	-	568.346	4.3453	pos	-	-	-	-	-	-	0.0046	3.2196	3.3287	3.1967	3.0656	3.1411	3.0784	3.2168	3.7158	3.4472	3.9321	3.3647	3.1204	3.1476	4.8841	4.7171	4.74	3.2544	3.9751	4.3419	3.5627	3.6945	5.0356	4.0004	3.8377	3.4966	4.4728	4.7742	3.6409	4.0388	3.9387	4.0209	4.0759	4.3383	4.3661	4.3592
pos_609	metab_605	metab_605	-	-	195.137	4.3648	pos	-	-	-	-	-	-	0.003	3.9069	4.2775	3.466	2.5899	2.6653	2.6027	3.726	3.9801	3.8153	4.0803	3.9347	3.2845	2.802	3.8267	4.1533	3.8003	4.0807	3.4706	4.2969	3.6805	3.9071	3.9337	4.1795	4.0826	3.4847	4.3527	4.4193	3.8133	4.3206	4.0674	4.1198	4.1294	4.0297	4.0383	4.0113
pos_610	metab_606	metab_606	-	-	277.215	4.4048	pos	-	-	-	-	-	-	0.0065	4.2067	4.5314	3.006	2.8749	3.0601	2.8877	3.8446	4.1728	4.0912	4.4444	4.0939	3.5955	2.9569	4.1857	4.5198	4.1656	4.2367	3.8851	4.378	3.888	3.9699	4.3883	4.4071	4.137	3.6842	4.5313	4.6484	4.1762	4.4406	4.1973	4.235	4.3169	4.2392	4.2266	4.2798
pos_611	metab_607	metab_607	-	-	430.294	4.3845	pos	-	-	-	-	-	-	0.0024	4.1908	4.7735	3.0586	4.8488	3.3931	4.0532	3.9443	4.979	5.1894	3.4677	4.7854	2.9823	3.0095	5.2674	5.1069	5.1239	3.1162	4.6367	4.8581	3.9816	3.2119	5.2899	3.0916	4.2224	4.2097	4.4823	5.093	4.6159	4.5023	4.0895	4.2246	4.3673	4.7681	4.7609	4.7891
pos_612	metab_608	metab_608	-	-	309.132	4.4257	pos	-	-	-	-	-	-	0.004	4.0225	4.3109	4.1037	3.488	4.2664	3.5009	4.1273	4.4048	4.0127	4.1246	4.4471	3.5429	3.6766	4.0011	4.3335	4.0515	4.1859	4.2267	4.3868	4.6253	4.6096	4.4363	4.2223	4.6425	4.4971	4.6622	4.6776	4.5298	4.8117	4.4874	4.6093	4.5264	4.3951	4.4028	4.3847
pos_613	metab_609	metab_609	-	-	131.085	4.4656	pos	-	-	-	-	-	-	0.0085	3.2377	3.8299	2.8906	2.3607	2.6013	2.3735	3.392	3.6859	3.3047	3.334	3.7625	2.4154	2.4425	3.6345	3.6607	3.5343	3.5656	3.3772	3.905	3.6486	3.6839	3.7611	3.4907	3.799	3.3831	3.9819	4.1691	3.565	3.9971	3.6651	3.7952	3.7484	3.7523	3.7009	3.6706
pos_614	metab_610	metab_610	-	-	443.226	4.5262	pos	-	-	-	-	-	-	0.0093	3.7498	4.4679	2.6242	2.4933	2.5687	2.5061	3.7864	4.2172	4.3306	2.6678	4.5188	2.5481	2.5752	4.2686	4.1956	4.0987	3.7805	2.8669	4.6706	3.5044	4.2444	2.7872	2.6572	4.4903	3.6232	4.639	4.924	2.7534	4.5514	4.1106	4.3683	4.3756	4.2864	4.2184	4.1851
pos_615	metab_611	metab_611	-	-	249.184	4.5262	pos	-	-	-	-	-	-	0.0024	4.2754	4.6271	3.7988	3.9988	3.9448	4.0756	4.4402	4.4859	4.6187	3.8547	4.7536	3.8779	3.9158	4.5473	4.5444	4.5449	4.3946	4.161	4.8066	4.2201	4.5494	4.2465	3.9776	4.6155	4.3234	4.8604	5.0895	4.2892	4.8032	4.5773	4.682	4.6892	4.5803	4.5847	4.5646
pos_616	Confertifoline	metab_612	-	-	235.168	4.5868	pos	M+H-H2O, M+H	C15H22O2	62.6	-	-3.34511	-	0.0032	4.5964	4.9216	4.429	4.1152	4.2703	3.8526	4.5693	4.7886	4.6378	4.7413	4.8345	4.2759	4.3664	4.989	5.0016	4.8886	4.7393	4.5412	4.9211	4.7345	4.8489	4.9352	4.7424	4.9375	4.5896	5.1787	5.1144	4.7912	5.056	4.837	4.9612	4.932	4.9121	4.8752	4.9027
pos_617	Allylestrenol	metab_613	HMDB0015500;LMST02030125	C12811	301.251	4.6063	pos	M+H-H2O, M+H	C21H32O	-	54.8	-3.49536	432-60-0	0.0048	3.5927	4.4152	3.583	3.5608	3.2604	2.1168	3.6109	4.1157	4.0706	3.778	4.4185	3.2655	3.3704	4.7386	4.5685	4.5959	4.258	4.4065	4.192	3.9582	2.3871	4.67	3.56	3.8301	2.2857	2.505	2.4846	2.3632	2.514	2.4274	2.4631	2.4512	4.1808	4.1286	4.1506
pos_618	metab_614	metab_614	-	-	198.185	4.6863	pos	-	-	-	-	-	-	0.0022	4.6555	4.4099	4.5857	4.7026	4.6842	4.7864	4.6663	4.498	4.6001	4.6509	4.481	4.6826	4.7319	4.3528	4.404	4.4496	4.543	4.4047	4.4069	4.495	4.4772	4.3357	4.5438	4.448	4.7004	4.4151	4.4289	4.5963	4.4682	4.5138	4.4753	4.517	4.5114	4.5031	4.4897
pos_619	metab_615	metab_615	-	-	192.138	4.5868	pos	-	-	-	-	-	-	0.002	4.6935	4.4876	4.66	4.8247	4.7635	4.8047	4.6851	4.5297	4.7933	4.6895	4.5804	4.7601	4.8134	4.4733	4.5633	4.6239	4.5872	4.4791	4.4262	4.5203	4.485	4.5484	4.6662	4.4849	4.8381	4.4118	4.9242	4.6795	4.735	4.8406	4.8904	4.8461	4.6947	4.6877	4.6894
pos_620	metab_616	metab_616	-	-	299.236	4.7479	pos	-	-	-	-	-	-	0.0036	4.0555	4.7261	3.7403	3.5673	3.5825	2.5657	3.8711	4.2823	4.2255	4.6471	4.5993	3.766	3.8105	4.8415	4.8554	4.7407	4.1864	4.361	4.2733	4.2718	3.1515	4.9463	4.4698	3.9899	2.7353	3.5747	3.2573	2.813	3.2233	2.8774	3.1811	2.9012	4.3698	4.3354	4.3734
pos_621	metab_617	metab_617	-	-	384.237	4.567	pos	-	-	-	-	-	-	0.0089	4.0123	4.0469	4.0825	4.1204	3.9202	4.0359	4.0221	4.1649	4.1464	4.077	4.2185	4.1015	3.9819	3.9775	4.0273	4.1269	3.8283	4.0092	4.0796	4.0317	3.9426	4.0201	4.1121	3.9652	3.954	4.0332	4.2374	4.1422	4.1698	4.1468	4.2516	4.2294	4.187	4.1379	4.0829
pos_622	metab_618	metab_618	-	-	417.211	4.8277	pos	-	-	-	-	-	-	0.0053	3.7874	4.7375	4.0741	2.9692	3.0447	2.982	4.2961	4.1671	4.2506	3.8835	3.2683	3.024	3.429	4.3762	4.4685	4.2232	4.1915	3.1931	4.9326	4.5867	4.4347	4.4349	4.1023	4.7321	4.2218	5.2378	5.153	4.2727	4.6172	4.8262	4.9065	4.886	4.6297	4.6101	4.6547
pos_623	metab_619	metab_619	-	-	243.195	5.048	pos	-	-	-	-	-	-	0.004	4.257	4.6281	4.1427	4.3583	4.0762	4.2017	4.3716	4.3293	4.2893	3.9095	4.7939	4.0664	4.2712	4.7656	4.645	4.7238	4.1117	3.919	4.3307	4.1616	4.1365	4.2438	4.0098	4.207	4.0319	4.2442	4.4188	3.9995	4.211	4.1762	4.0996	4.143	4.4217	4.3827	4.4294
pos_624	metab_620	metab_620	-	-	419.226	4.9269	pos	-	-	-	-	-	-	0.0053	3.8561	4.371	3.0292	2.898	2.9736	2.9109	4.0982	4.2249	4.0058	3.0727	4.4454	2.9529	2.98	4.0105	4.0128	3.8182	4.1244	3.1487	4.7227	3.7337	3.8943	3.7837	3.0622	4.3502	3.2962	4.424	4.7576	3.6848	4.4879	3.7483	4.1852	4.1839	4.1275	4.1447	4.1568
pos_625	metab_621	metab_621	-	-	414.299	5.1275	pos	-	-	-	-	-	-	0.0097	4.1669	4.3982	3.3291	4.19	3.2735	3.2107	3.3492	4.4609	5.5364	3.3727	4.7759	3.2528	3.28	4.9714	4.8749	4.8907	3.3867	4.1782	4.6055	3.9481	3.4825	4.9825	3.3621	3.9498	3.3806	4.0471	4.9929	3.4584	4.541	3.6007	3.7658	4.0703	4.5606	4.5527	4.4673
pos_627	Longicamphenylone	metab_622	-	-	207.174	5.048	pos	M+H-H2O, M+H	C14H22O	50.4	-	-3.16062	-	0.0045	4.4837	5.0412	3.8867	4.4297	3.4552	3.3053	4.747	4.7167	4.6552	3.7753	5.1932	3.7117	3.9499	5.1888	5.0552	5.1027	4.3641	4.0766	4.9086	4.4043	4.5453	4.6764	3.9594	4.7307	4.0766	4.7566	4.9871	4.2223	4.6944	4.423	4.5511	4.5297	4.7837	4.7643	4.823
pos_628	metab_623	metab_623	-	-	446.289	4.9861	pos	-	-	-	-	-	-	0.0047	5.1234	4.8061	3.7559	4.3674	4.6133	4.2438	4.848	5.0001	5.6448	4.4466	5.0021	4.2485	3.7068	5.2962	5.1685	5.206	4.4834	4.865	5.1163	4.1929	4.0091	5.4104	4.457	4.7653	4.3465	4.0336	5.0595	4.4604	4.8485	4.4637	4.537	4.5009	4.9473	4.9563	5.0068
pos_629	metab_624	metab_624	-	-	228.195	4.9678	pos	-	-	-	-	-	-	0.0023	6.351	6.1305	6.3074	6.4549	6.3968	6.4712	6.3187	6.2072	6.3087	6.3147	6.1832	6.4157	6.435	6.0908	6.0899	6.1771	6.2648	6.1443	6.1095	6.2023	6.1417	5.9903	6.286	6.1103	6.3509	6.0702	6.0881	6.2892	6.1459	6.2675	6.2136	6.2237	6.2227	6.1961	6.186
pos_630	metab_625	metab_625	-	-	383.205	5.3826	pos	-	-	-	-	-	-	0.0175	3.1447	3.9032	3.1542	2.9907	3.0662	3.0035	3.9785	3.9114	3.6279	3.1654	3.8792	3.0455	3.0727	3.9411	3.5187	3.7758	3.7047	3.2146	4.5415	3.2746	4.1304	3.285	3.1549	4.3198	4.143	4.7006	5.0014	3.9369	4.6738	4.1934	4.4331	4.4747	4.1246	4.1152	4.1894
pos_632	metab_626	metab_626	-	-	317.246	5.7775	pos	-	-	-	-	-	-	0.0102	3.102	4.2978	3.5664	2.6426	2.718	2.6554	4.0589	4.0924	3.8487	4.3898	4.156	2.6973	2.7245	4.4022	4.602	4.3245	3.2944	3.1618	3.6664	4.0703	2.9268	4.7136	3.9917	2.9426	2.825	3.045	3.0245	2.9028	3.054	2.9672	3.003	2.991	3.9319	3.9083	3.9359
pos_633	metab_627	metab_627	-	-	415.21	5.8563	pos	-	-	-	-	-	-	0.0031	6.1914	6.0709	6.1025	6.3382	6.1699	6.2781	6.195	6.035	6.1842	6.0925	5.9866	6.2177	6.1257	5.7878	5.8089	5.826	6.0218	5.8933	5.964	5.9757	5.8691	5.7209	6.0591	5.9118	6.2828	5.7475	5.8729	6.0654	5.8891	6.1276	5.9522	6.103	5.9358	5.8999	5.8978
pos_634	metab_628	metab_628	-	-	516.331	5.8563	pos	-	-	-	-	-	-	0.0076	5.0153	4.9944	4.9417	5.0801	4.8437	4.9039	4.8749	4.7728	4.9167	4.8362	4.8817	5.0131	4.7493	4.6278	4.7989	4.6438	4.8381	4.8023	4.8908	4.9188	4.8304	5.0309	4.9696	4.9811	5.0287	4.5727	4.7145	4.7667	4.7114	4.8838	4.7408	4.899	4.6442	4.6967	4.7041
pos_635	Pteroside B	metab_629	HMDB0030760	-	381.19	4.4656	pos	M+H-H2O, M+H	C20H28O7	52.2	-	-3.36506	29774-74-1	0.0079	4.2936	4.8033	3.9538	3.5888	3.846	3.6372	4.5275	4.6832	4.424	4.0064	4.7361	3.6437	3.6709	4.4777	4.4558	4.3882	4.5521	4.0498	4.9352	4.543	4.5637	4.401	4.407	4.7647	4.3369	4.8538	5.1265	4.5476	4.9319	4.5263	4.6849	4.7246	4.5783	4.5323	4.6214
pos_636	metab_630	metab_630	-	-	464.299	4.4448	pos	-	-	-	-	-	-	0.0103	4.3842	4.2439	3.7072	4.3458	2.1124	2.0502	3.8145	4.555	5.7415	3.888	4.8156	2.0919	2.1189	5.0581	4.8929	4.8076	3.6425	4.5824	4.6808	4.0873	3.6285	5.1832	3.8835	4.2022	2.2189	4.4939	4.948	4.1293	4.4298	3.4169	4.035	4.0808	4.6926	4.5962	4.705
pos_637	metab_631	metab_631	-	-	203.142	4.203	pos	-	-	-	-	-	-	0.0017	4.2383	4.7721	4.2233	3.1207	3.8268	2.8903	4.2749	4.5159	4.4932	4.2234	4.5211	3.8918	3.5533	4.6979	4.7179	4.6664	4.4249	4.2744	4.8616	4.5751	4.6309	4.8943	4.3171	4.7845	4.5826	5.1969	5.1241	4.6503	4.9033	4.842	4.9506	4.9475	4.7592	4.7563	4.7562
pos_638	metab_632	metab_632	-	-	197.153	4.3248	pos	-	-	-	-	-	-	0.0085	3.6502	3.9834	3.0787	3.7386	2.6944	2.7611	3.875	3.7978	3.7836	3.3185	4.2813	2.9891	3.39	4.2957	4.1232	4.2033	3.1704	2.9594	3.8485	3.5377	3.4498	3.8763	2.9851	3.6077	3.1208	3.738	3.7276	2.8792	3.71	3.3009	3.447	3.4608	3.8261	3.8633	3.8297
pos_639	metab_633	metab_633	-	-	233.116	4.1425	pos	-	-	-	-	-	-	0.0214	2.5205	3.5836	2.4977	2.367	2.4423	2.3798	2.5178	3.3488	2.5151	2.5412	2.8005	2.4216	2.4487	3.7344	3.6508	3.631	2.5552	3.3399	3.5025	3.5379	3.7439	3.9109	2.5307	3.6598	3.9464	4.5052	4.2785	3.7793	4.4803	4.1705	4.2778	4.1621	3.8495	3.9256	3.7002
pos_640	metab_634	metab_634	-	-	235.132	4.1425	pos	-	-	-	-	-	-	0.0093	2.5673	3.7653	2.5445	2.4137	2.489	2.4265	2.9944	3.4377	3.2836	3.3069	3.7504	2.4684	2.4955	4.1004	4.0804	4.0026	2.8761	3.8181	4.029	3.1622	4.0968	4.4069	2.5775	4.0973	3.8818	4.7344	4.4152	3.7833	4.4452	4.2053	4.3202	4.3166	4.1461	4.0666	4.13
pos_641	metab_635	metab_635	-	-	179.142	4.1425	pos	-	-	-	-	-	-	0.0063	3.4949	3.9424	3.4492	3.1122	2.7497	2.6871	3.8783	3.9689	3.4793	3.7785	4.1508	2.7291	3.2921	4.2017	4.261	4.1234	3.8052	3.6119	3.8348	4.0261	3.9955	4.3607	4.084	4.0788	3.7677	4.345	4.2003	3.8571	4.3331	4.0934	4.1843	4.1093	4.0815	4.0241	4.0794
pos_642	metab_636	metab_636	-	-	209.08	6.9147	pos	-	-	-	-	-	-	0.0027	5.2979	5.0681	5.2928	5.4224	5.3288	5.4153	5.2875	5.1918	5.2691	5.2714	5.1398	5.4092	5.3932	5.0844	5.0397	5.1202	5.2426	5.1308	5.075	5.2214	5.1295	4.9888	5.2612	5.0996	5.2675	5.0463	5.0637	5.2621	5.1136	5.2039	5.1927	5.2009	5.1371	5.1374	5.1698
pos_643	metab_637	metab_637	-	-	361.221	6.9532	pos	-	-	-	-	-	-	0.0037	5.0455	4.8009	4.9861	5.1449	5.0431	5.21	4.9758	4.9218	5.0283	4.9861	4.8591	5.1044	5.1122	4.8081	4.7797	4.8775	4.9599	4.7666	4.7785	4.9211	4.909	4.7086	4.9951	4.7887	4.9928	4.7685	4.766	4.9615	4.7557	4.9355	4.8681	4.8737	4.8982	4.8731	4.864
pos_644	metab_638	metab_638	-	-	279.158	6.9147	pos	-	-	-	-	-	-	0.0018	5.9732	5.7608	5.9524	6.109	6.0181	6.1124	5.9666	5.8413	5.9566	5.9694	5.8036	6.0663	6.0794	5.7363	5.7299	5.8099	5.9156	5.8025	5.7504	5.8717	5.7896	5.6431	5.9311	5.7797	5.9544	5.6997	5.7395	5.9191	5.7954	5.8957	5.8538	5.8766	5.8284	5.8078	5.837
pos_645	metab_639	metab_639	-	-	493.312	7.1108	pos	-	-	-	-	-	-	0.0121	4.6042	5.5807	4.5549	4.5996	4.5819	4.6177	4.5362	4.4957	4.5984	4.4803	4.2916	4.6474	4.482	4.2026	4.3456	4.2308	4.5852	4.3073	4.2598	4.4921	4.2762	4.2167	4.69	4.3604	4.6713	4.2097	4.3393	4.6333	4.5453	4.483	4.5084	4.3514	4.5059	4.4712	4.4163
pos_646	metab_640	metab_640	-	-	383.278	7.1697	pos	-	-	-	-	-	-	0.0241	4.054	5.1174	3.8416	4.0627	4.2428	4.1676	4.0531	3.895	3.3746	3.6822	3.798	4.0231	3.6216	3.3776	3.3062	3.7416	3.9329	3.8163	3.1862	3.4064	3.6568	3.6262	3.7433	3.5654	4.0051	3.286	3.5764	4.0152	3.7426	3.751	3.776	3.8046	3.6211	3.7573	3.7832
pos_647	metab_641	metab_641	-	-	403.231	7.3659	pos	-	-	-	-	-	-	0.0047	5.0744	4.9095	5.0326	5.23	5.0944	5.286	5.0964	4.9638	5.0916	5.1188	4.914	5.2049	5.1958	4.8905	4.8308	4.9751	5.0347	4.9036	4.9012	4.9258	4.9078	4.7995	4.9822	4.9158	5.0918	4.8604	4.8848	5.0471	4.9279	5.0462	4.9231	5.055	4.9233	4.9496	4.9862
pos_648	metab_642	metab_642	-	-	449.286	7.1312	pos	-	-	-	-	-	-	0.016	4.4165	5.3737	4.3657	4.4526	4.4656	4.4524	4.1503	4.1755	4.186	4.3119	4.1516	4.248	4.2833	3.9594	4.0286	3.8169	4.3494	4.0886	4.0248	4.2573	4.1429	4.1388	4.266	4.0971	4.4605	3.9663	3.9941	4.2409	4.1462	4.3349	4.1998	4.2423	4.1712	4.1477	4.3104
pos_649	metab_643	metab_643	-	-	149.023	6.9147	pos	-	-	-	-	-	-	0.0022	6.0699	5.8717	6.0607	6.1926	6.1134	6.1985	6.0664	5.9516	6.0565	6.0625	5.9314	6.1693	6.1809	5.8556	5.8353	5.9292	6.0343	5.9136	5.8633	5.9849	5.9056	5.7738	6.05	5.8701	6.0418	5.815	5.8406	6.0358	5.895	5.9907	5.9593	5.9772	5.925	5.9178	5.9506
pos_650	metab_644	metab_644	-	-	223.168	3.9997	pos	-	-	-	-	-	-	0.0036	5.2388	5.616	4.8879	4.734	4.9511	4.6794	5.3318	5.4046	5.708	5.1442	5.7779	5.0717	4.8796	5.4973	5.5055	5.4615	5.3474	5.0747	5.6861	5.103	5.5346	5.2607	5.0018	5.5908	5.463	5.9879	6.1594	5.3784	5.9039	5.6764	5.8049	5.7963	5.6059	5.5723	5.6218
pos_651	metab_645	metab_645	-	-	414.157	3.8378	pos	-	-	-	-	-	-	0.006	4.3405	5.0036	4.3874	3.4668	4.0039	3.4797	4.7085	4.8617	4.3627	4.5629	4.9786	3.8894	4.2491	5.06	5.0846	4.9907	4.7782	5.0935	5.0522	5.3468	5.2535	4.6151	4.6687	5.2398	4.2196	5.1073	5.0542	4.5676	5.0368	4.7154	4.8843	4.869	4.9282	4.9153	4.9919
pos_652	metab_646	metab_646	-	-	167.143	3.8378	pos	-	-	-	-	-	-	0.0044	4.8268	5.0114	4.6683	4.2282	4.4864	4.2304	4.8784	4.9962	4.6208	4.601	4.6714	4.0405	4.3498	4.8755	4.9268	4.8035	4.9875	4.6062	5.1265	4.9389	4.9603	5.029	4.9376	5.0433	4.8879	5.5898	5.4491	5.0547	5.5362	5.2539	5.387	5.3532	5.0718	5.0731	5.1194
pos_653	metab_647	metab_647	-	-	429.317	7.9912	pos	-	-	-	-	-	-	0.0059	4.9498	4.7762	4.9103	5.0519	5.0386	5.0513	4.8594	4.7618	4.9718	4.8783	4.7116	5.0168	5.0219	4.7202	4.6634	4.6983	4.7569	4.7429	4.7423	4.7991	4.6839	4.5766	4.8611	4.7586	4.8828	4.6825	4.6947	4.9266	4.7012	4.8684	4.7898	4.7613	4.7122	4.7075	4.7586
pos_654	metab_648	metab_648	-	-	297.239	8.1086	pos	-	-	-	-	-	-	0.0094	4.6409	4.2536	4.4574	4.6531	4.6364	4.7209	4.6016	4.3495	4.4968	4.5715	4.3611	4.6022	4.5507	4.3002	4.2878	4.3606	4.5049	4.3388	4.3116	4.388	4.3094	4.281	4.4889	4.2661	4.4303	4.2573	4.3216	4.5119	4.3529	4.4262	4.4061	4.4499	4.4385	4.3237	4.3839
pos_655	metab_649	metab_649	-	-	251.2	3.7561	pos	-	-	-	-	-	-	0.0243	2.1381	2.2466	2.1154	1.9853	2.0602	1.998	2.1353	2.242	2.7607	3.4879	3.7839	2.5996	2.0666	3.5895	3.7768	3.5854	2.1727	2.2076	2.5485	2.4392	2.2678	2.713	2.1482	2.2836	3.4414	4.1786	4.0402	3.5705	4.0756	3.8252	3.969	3.816	3.414	3.6075	3.4368
pos_656	metab_650	metab_650	-	-	235.168	3.5494	pos	-	-	-	-	-	-	0.0051	3.981	4.2793	3.7275	3.0738	3.3556	3.3332	3.9775	4.1648	4.0001	4.0432	4.3337	2.5473	3.6658	4.303	4.3988	4.2672	4.0253	4.1615	4.3508	4.1821	4.4044	4.3182	3.9087	4.4401	4.2889	4.823	4.724	4.4244	4.698	4.5087	4.5941	4.5738	4.4777	4.4175	4.4449
pos_657	4-Formylsalicylic acid	metab_651	-	C14100	149.023	9.1763	pos	M+H-H2O, M+H	C8H6O4	53.9	-	-3.13857	-	0.0023	5.4918	5.3141	5.4968	5.6229	5.5291	5.6807	5.5011	5.3873	5.4931	5.4849	5.3754	5.6063	5.6005	5.3333	5.3161	5.3694	5.4264	5.3296	5.2953	5.3716	5.3481	5.1858	5.4528	5.3119	5.5248	5.254	5.3027	5.4778	5.3383	5.4865	5.366	5.4331	5.4005	5.3755	5.3854
pos_658	metab_652	metab_652	-	-	393.289	9.1964	pos	-	-	-	-	-	-	0.0225	4.6554	4.5648	4.6463	4.8184	4.6719	4.8932	4.7476	4.6199	4.3608	4.5985	4.6311	4.6648	4.7803	4.5213	4.2172	4.1563	4.5465	4.6111	4.499	4.6282	4.3486	4.3239	4.2441	4.5612	4.7287	4.4692	4.4262	4.6733	4.4582	4.8074	4.5588	4.7304	4.7074	4.4688	4.5005
pos_659	metab_653	metab_653	-	-	244.19	8.8857	pos	-	-	-	-	-	-	0.0073	4.843	4.3229	4.5307	4.4071	4.8968	4.6454	4.4095	4.6217	4.3191	4.5631	4.1333	4.6482	4.6347	3.9887	4.7382	3.4661	4.4284	4.0554	4.2342	4.401	4.4472	4.0833	4.7037	4.413	4.584	3.6956	4.5277	4.6342	4.7159	4.3648	4.0861	4.3858	4.6484	4.5714	4.5982
pos_660	13E-Docosenamide	metab_654	-	-	338.34	9.6439	pos	M+H, 2M+H	C22H43NO	76.7	-	-3.92007	-	0.0049	6.5508	6.2869	6.4714	6.5521	6.5817	6.5638	6.4778	6.4179	6.4552	6.5236	6.36	6.5194	6.2432	5.8724	6.3826	5.9304	6.4352	6.2555	6.0353	6.3246	6.3567	6.2687	6.5557	6.4148	6.4345	5.8238	6.3747	6.6225	6.3635	6.4675	6.2646	6.4144	6.2224	6.1741	6.1615
pos_661	metab_655	metab_655	-	-	280.262	9.6439	pos	-	-	-	-	-	-	0.0057	4.4008	4.1416	4.4074	4.431	4.6713	4.5535	4.7273	4.4329	4.4529	4.4378	4.5909	4.6041	4.3688	4.127	4.3112	4.081	4.6176	4.1447	4.0746	4.3319	4.2134	4.1277	4.4686	4.2811	4.6669	3.8808	4.3585	4.6604	4.5972	4.543	4.5043	4.5094	4.36	4.3905	4.4292
pos_662	metab_656	metab_656	-	-	296.257	9.6439	pos	-	-	-	-	-	-	0.0046	4.9034	4.6453	4.8625	4.9869	5.1422	5.086	5.1307	4.8952	4.9052	4.904	4.9614	5.0954	4.8925	4.5717	4.8283	4.5919	5.0061	4.6455	4.5842	4.8192	4.7986	4.6189	4.9368	4.766	5.0396	4.3377	4.7897	5.0677	5.006	5.0428	4.9227	4.9628	4.8391	4.8152	4.8659
pos_663	metab_657	metab_657	-	-	301.215	3.5494	pos	-	-	-	-	-	-	0.0144	3.2347	4.0085	3.4926	3.0807	3.3372	3.0935	4.0234	4.1037	3.5632	4.0315	4.0543	3.2662	3.6203	4.1885	4.3626	4.1226	3.8859	4.3523	4.3608	4.2269	4.0241	4.6701	3.8744	4.2839	3.2634	4.0329	3.4817	3.3708	4.2318	3.7106	3.8821	3.8243	3.9969	4.1452	4.117
pos_664	metab_658	metab_658	-	-	663.452	10.3439	pos	-	-	-	-	-	-	0.0032	6.317	5.991	6.3129	6.4679	6.2692	6.3559	6.268	6.1642	6.2648	6.2699	6.1422	6.3125	6.2749	5.8981	6.0896	5.9713	6.1619	6.0516	5.9456	6.2116	6.1321	5.9418	6.1797	6.0761	6.2599	5.8209	6.0023	6.2637	6.0824	6.1917	6.103	6.119	6.0067	6.0466	5.9945
pos_666	metab_660	metab_660	-	-	356.242	3.5699	pos	-	-	-	-	-	-	0.0089	4.0536	4.6682	3.7885	3.2493	3.3945	3.2621	3.8696	4.5769	3.8624	4.2436	4.5362	3.3041	3.3313	4.7351	4.8007	4.5387	4.2668	4.8516	4.793	4.4252	4.6063	5.0844	4.1562	4.7831	4.1513	5.0545	5.0794	4.515	4.7615	4.449	4.6449	4.637	4.6764	4.6767	4.5913
pos_667	Tetrahydrogestrinone	metab_661	HMDB0004626	-	313.215	3.5494	pos	M+H-H2O, M+H	C21H28O2	-	51.8	-4.08987	618903-56-3	0.004	3.8845	4.5489	4.0014	3.6582	4.0772	2.77	4.4988	4.5255	4.0517	4.1956	4.3619	3.8796	3.865	4.621	4.6289	4.4757	4.3511	4.7303	4.7354	4.6223	4.4764	5.0723	4.2235	4.6697	3.5446	4.4644	3.9786	3.8072	4.6229	4.161	4.3077	4.3153	4.5169	4.4752	4.4702
pos_675	metab_669	metab_669	-	-	84.081	14.0327	pos	-	-	-	-	-	-	0.0013	7.0832	6.9055	7.0842	7.1943	7.1358	7.238	7.1089	6.9899	7.0948	7.0822	6.9459	7.1927	7.2187	6.8754	6.8678	6.9424	7.0355	6.9194	6.8873	6.9699	6.9341	6.7758	7.0623	6.8995	7.0852	6.8514	6.89	7.0558	6.9239	7.0473	6.9846	7.0026	6.9788	6.9624	6.9673
pos_678	metab_672	metab_672	-	-	181.988	14.0327	pos	-	-	-	-	-	-	0.0089	5.4173	5.2118	5.3445	5.4374	5.4999	5.5879	5.4545	5.3412	5.4613	5.4218	5.2965	5.5406	5.5748	5.2374	5.2433	5.2937	5.3146	5.1762	5.2196	5.3111	5.274	5.1132	5.3982	5.2471	5.3053	5.1202	5.1194	5.3344	5.1352	5.2686	5.2329	5.2358	5.2118	5.3198	5.3016
pos_679	metab_673	metab_673	-	-	266.937	14.0509	pos	-	-	-	-	-	-	0.0132	5.2143	5.0074	5.2898	5.5164	5.1983	5.2927	5.2111	5.0767	5.2266	5.1759	5.0259	5.2742	5.3452	4.9984	4.9993	5.0223	5.2665	5.2195	4.9643	5.0363	5.0111	4.8686	5.1892	4.9965	5.3419	5.0474	5.1446	5.3231	5.2204	5.2816	5.2256	5.2602	5.2089	5.034	5.058
pos_682	metab_676	metab_676	-	-	124.956	14.0509	pos	-	-	-	-	-	-	0.0194	4.9363	4.7014	5.0213	5.1947	5.0118	5.0624	4.8706	4.8409	4.8437	4.8638	4.8319	4.9846	5.1023	4.6884	4.6689	4.7565	4.9657	4.8125	4.76	4.8239	4.7138	4.5626	4.8768	4.7711	5.1553	4.7904	4.8621	4.9798	4.9426	5.0559	4.999	4.9792	5.0279	4.8156	4.7824
pos_683	metab_677	metab_677	-	-	178.99	14.0509	pos	-	-	-	-	-	-	0.0168	5.7474	5.532	5.7943	5.9772	5.7557	5.8529	5.6989	5.6025	5.7155	5.6705	5.5579	5.8107	5.8427	5.4857	5.4657	5.5501	5.78	5.6989	5.5157	5.6135	5.5588	5.4363	5.7219	5.5436	5.8973	5.6074	5.6902	5.8474	5.7551	5.846	5.7417	5.7728	5.7996	5.6065	5.5832
pos_684	metab_678	metab_678	-	-	333.973	14.0327	pos	-	-	-	-	-	-	0.0121	5.2689	5.0642	5.1702	5.2039	5.2029	5.347	5.2399	5.0837	5.2079	5.1984	4.9488	5.2691	5.2253	5.0176	4.9687	4.9892	5.0271	4.9142	5.0113	4.9979	5.0265	4.8749	5.1598	4.9855	5.0935	4.862	4.7907	5.0456	4.8389	5.0105	4.9631	5.0263	4.9159	4.9991	5.0665
pos_686	metab_680	metab_680	-	-	154.014	14.1433	pos	-	-	-	-	-	-	0.0062	4.9744	4.7906	4.9244	5.0127	5.0149	5.1254	5.0134	4.8786	4.9725	4.9728	4.8222	5.0904	5.0984	4.7595	4.7502	4.8117	4.8672	4.77	4.7737	4.8666	4.8349	4.6391	4.9815	4.7882	4.9086	4.7026	4.6953	4.8812	4.7603	4.8753	4.8344	4.8127	4.8009	4.8596	4.8633
pos_687	metab_681	metab_681	-	-	244.997	14.1433	pos	-	-	-	-	-	-	0.0018	5.9948	5.791	5.9485	6.0865	6.0532	6.1519	5.9927	5.8787	5.9739	5.9788	5.8337	6.0758	6.103	5.7604	5.7382	5.8207	5.9318	5.7936	5.7735	5.8877	5.806	5.6521	5.9452	5.7626	5.9845	5.7281	5.7569	5.939	5.7957	5.9082	5.8625	5.8831	5.8607	5.8604	5.8383
pos_688	metab_682	metab_682	-	-	128.95	14.1614	pos	-	-	-	-	-	-	0.001	6.4484	6.2429	6.4082	6.5462	6.5068	6.5952	6.4404	6.3316	6.4251	6.4245	6.2871	6.5216	6.5665	6.2222	6.1978	6.2878	6.3787	6.2347	6.2349	6.3374	6.2601	6.1083	6.3938	6.2266	6.4307	6.1806	6.2108	6.3908	6.2438	6.3629	6.3211	6.3397	6.3132	6.3125	6.2982
pos_689	metab_683	metab_683	-	-	421.846	14.0144	pos	-	-	-	-	-	-	0.0229	4.973	4.6708	4.1857	4.5816	4.7067	5.0909	4.7634	4.5463	4.617	4.7781	4.4179	4.532	4.7242	4.5354	4.4938	4.3159	4.5805	4.3499	4.6636	4.4236	4.6324	4.4972	4.6241	4.6084	4.512	3.6797	4.1457	3.8478	4.0225	3.6018	4.4082	4.3653	4.3261	4.6098	4.492
pos_690	metab_684	metab_684	-	-	174.021	14.1991	pos	-	-	-	-	-	-	0.0018	5.6717	5.4699	5.6271	5.7488	5.7429	5.8262	5.6699	5.5673	5.6591	5.6585	5.521	5.7591	5.7983	5.4523	5.4254	5.5208	5.5894	5.4483	5.4627	5.569	5.4984	5.3433	5.6313	5.4632	5.6283	5.3897	5.4187	5.5982	5.4531	5.5726	5.5376	5.5485	5.5236	5.5464	5.5284
pos_692	metab_686	metab_686	-	-	201.008	14.1991	pos	-	-	-	-	-	-	0.0018	6.2117	5.9997	6.1622	6.3108	6.2615	6.3575	6.2	6.0891	6.1724	6.1804	6.0353	6.2769	6.3151	5.9747	5.9472	6.037	6.1368	5.9882	5.9989	6.1002	6.0158	5.8528	6.1451	5.9739	6.1966	5.9428	5.9703	6.1443	6.0004	6.1224	6.0881	6.1052	6.0832	6.0657	6.0523
pos_693	metab_687	metab_687	-	-	145.965	14.2382	pos	-	-	-	-	-	-	0.002	5.1212	4.9158	5.0893	5.2067	5.18	5.2721	5.1096	5.0084	5.0897	5.0958	4.9633	5.1936	5.2417	4.8996	4.8682	4.9692	5.0388	4.8931	4.9096	5.0083	4.9266	4.7646	5.058	4.8913	5.0941	4.839	4.8622	5.0362	4.8816	5.0161	4.9854	5.0038	4.9704	4.9761	4.9739
pos_694	metab_688	metab_688	-	-	148.039	14.4824	pos	-	-	-	-	-	-	0.0118	4.782	4.6193	4.7516	4.8652	4.781	4.8897	4.7061	4.5865	4.7099	4.7349	4.5626	4.8247	4.8124	4.4986	4.5163	4.5818	4.6297	4.55	4.5496	4.6491	4.5713	4.5414	4.7617	4.6046	4.5962	4.4364	4.4647	4.6423	4.5299	4.6089	4.6156	4.6051	4.4936	4.5896	4.6229
pos_695	metab_689	metab_689	-	-	110.009	14.0144	pos	-	-	-	-	-	-	0.0164	4.2555	4.1077	4.1375	4.5299	4.4859	4.6987	4.4642	4.3447	4.6229	4.4524	4.2195	4.5125	4.5323	4.1585	4.4419	4.2209	4.1301	4.1221	4.161	4.1618	4.3465	4.0165	4.3494	4.4606	4.0558	4.0711	4.123	4.2508	4.2358	4.0546	4.0046	4.248	4.3151	4.167	4.3178
pos_700	metab_694	metab_694	-	-	219.126	14.0144	pos	-	-	-	-	-	-	0.0212	4.7197	4.5396	4.634	4.3483	4.7813	4.9094	4.8721	4.7559	4.8803	4.8126	4.6707	4.876	4.9697	4.6531	4.5961	4.6649	4.4848	4.4501	4.5547	4.4966	4.6599	4.4478	4.7745	4.5942	4.3187	4.18	4.2373	4.6073	4.0513	4.3086	4.4715	4.294	4.5011	4.6001	4.692
pos_703	metab_697	metab_697	-	-	257.939	14.0144	pos	-	-	-	-	-	-	0.0151	4.8174	4.7346	4.6255	4.8847	4.8223	5.1332	4.9419	4.7803	5.0035	4.9342	4.6759	4.9537	4.957	4.6199	4.7695	4.739	4.5269	4.3555	4.7873	4.6006	4.7391	4.4535	4.8686	4.8301	4.4753	4.3622	4.5046	4.5458	4.6375	4.4922	4.542	4.4119	4.76	4.6083	4.7925
pos_704	metab_698	metab_698	-	-	143.996	15.9636	pos	-	-	-	-	-	-	0.0009	5.7928	5.5872	5.7517	5.9103	5.8313	5.9347	5.7823	5.6531	5.7752	5.7666	5.6156	5.8707	5.8912	5.5467	5.5368	5.6224	5.7267	5.5886	5.5542	5.6546	5.6011	5.4493	5.7365	5.5568	5.7689	5.5056	5.5537	5.7351	5.5945	5.7057	5.6631	5.6844	5.6378	5.6344	5.6289
pos_705	metab_699	metab_699	-	-	130.007	14.8413	pos	-	-	-	-	-	-	0.0025	5.55	5.3258	5.4945	5.6754	5.5974	5.6923	5.5271	5.4176	5.4994	5.5179	5.3799	5.6029	5.6502	5.2991	5.2743	5.3763	5.4783	5.3278	5.3276	5.4141	5.3346	5.1807	5.466	5.2951	5.5518	5.2725	5.32	5.4797	5.3398	5.453	5.4271	5.4478	5.402	5.3853	5.3651
pos_706	metab_700	metab_700	-	-	232.889	14.0144	pos	-	-	-	-	-	-	0.0164	5.2433	5.0436	5.2449	5.2273	4.9976	5.2906	5.053	4.9022	5.0206	4.9634	4.7111	5.0771	5.0798	4.7457	4.748	4.8043	5.1598	5.0014	4.8787	4.795	4.8672	4.783	5.0351	4.9154	5.1041	4.9025	4.9312	5.128	4.8284	5.1526	5.1079	5.0932	4.9875	4.7889	4.9003
pos_707	metab_701	metab_701	-	-	184.028	14.0144	pos	-	-	-	-	-	-	0.0144	4.9655	4.8135	5.057	5.2563	5	5.1547	5.061	4.9582	5.0375	4.978	4.8525	5.124	5.1034	4.8047	4.8175	4.786	5.0097	4.9109	4.7833	4.8109	4.8512	4.6287	4.9615	4.8524	5.1109	4.8153	4.9179	5.0746	4.9795	5.1382	4.971	4.9999	5.0622	4.8649	4.9284
pos_708	metab_702	metab_702	-	-	123.04	14.0144	pos	-	-	-	-	-	-	0.0129	4.5496	4.444	4.4781	4.6843	4.6975	4.9249	4.6824	4.5722	4.8278	4.6654	4.4769	4.7432	4.8063	4.442	4.6079	4.483	4.4568	4.3173	4.4208	4.4618	4.5967	4.2462	4.6056	4.6111	4.4406	4.2217	4.3156	4.5134	4.3018	4.4225	4.3498	4.3519	4.4748	4.4989	4.5699
pos_712	metab_706	metab_706	-	-	331.226	3.5699	pos	-	-	-	-	-	-	0.0032	4.4732	4.8504	4.2869	4.0971	4.4608	3.5794	4.7794	4.8082	4.5968	4.6431	4.7951	4.2256	4.1863	4.9659	4.9809	4.8531	4.7445	4.9756	5.0111	4.8585	4.8627	5.3647	4.5843	4.965	4.2328	4.9207	4.6944	4.4416	5.0153	4.6968	4.8014	4.7853	4.8694	4.8558	4.8919
pos_714	metab_708	metab_708	-	-	435.127	3.4882	pos	-	-	-	-	-	-	0.0055	4.6576	5.371	4.8004	3.8402	4.9502	2.6642	4.6658	5.0088	4.2963	4.5762	4.6612	4.6619	4.8808	5.0033	4.9483	4.9216	5.0482	5.2843	5.1369	5.1374	5.3017	2.9455	4.8847	5.2743	4.9174	5.2826	5.1615	4.4232	5.417	5.1108	5.2457	5.2141	5.0496	5.0398	5.082
pos_716	metab_710	metab_710	-	-	158.964	13.8537	pos	-	-	-	-	-	-	0.0094	5.114	4.9541	5.0914	5.1749	5.1713	5.2989	5.1576	5.0472	5.1605	5.1496	5.0113	5.2846	5.2831	4.9382	4.9608	5.0102	4.9956	4.8904	4.9115	5.0189	4.9667	4.8518	5.1178	4.9399	5.0012	4.8058	4.8364	5.0153	4.8632	4.9906	4.9382	4.9518	4.924	5.0029	5.0425
pos_717	metab_711	metab_711	-	-	226.951	13.8537	pos	-	-	-	-	-	-	0.012	5.5916	5.4114	5.5426	5.6126	5.6596	5.787	5.6568	5.5272	5.6654	5.6226	5.5046	5.7447	5.7601	5.4116	5.4263	5.4946	5.4294	5.3143	5.3744	5.4865	5.4207	5.2983	5.5908	5.4165	5.4038	5.2185	5.231	5.413	5.2847	5.3723	5.3814	5.3971	5.3429	5.4591	5.5008
pos_719	metab_713	metab_713	-	-	111.039	14.0144	pos	-	-	-	-	-	-	0.0042	5.3537	5.2032	5.3788	5.4453	5.3807	5.444	5.4157	5.2888	5.4108	5.3435	5.208	5.5069	5.4677	5.1711	5.1486	5.1937	5.3226	5.2119	5.1334	5.1761	5.2231	5.0753	5.3393	5.1954	5.3882	5.1377	5.2006	5.3587	5.2051	5.362	5.2582	5.3145	5.2502	5.2285	5.2854
pos_720	metab_714	metab_714	-	-	200.095	14.0144	pos	-	-	-	-	-	-	0.0209	5.7342	5.6112	5.7163	5.6625	5.7777	5.9053	5.8734	5.7598	5.8918	5.8066	5.6752	5.964	5.9333	5.6258	5.6461	5.666	5.6061	5.4989	5.5851	5.5844	5.696	5.4865	5.8197	5.5914	5.5693	5.4427	5.4368	5.6255	5.3911	5.6089	5.5404	5.5705	5.4659	5.6292	5.7179
pos_721	metab_715	metab_715	-	-	296.257	13.9732	pos	-	-	-	-	-	-	0.0105	4.6216	4.4042	4.5649	4.5653	4.6739	4.7791	4.6433	4.4187	4.5346	4.6057	4.4102	4.7529	4.6419	4.4085	4.3724	4.4233	4.4504	4.2825	4.3898	4.4836	4.4368	4.298	4.5747	4.4219	4.4793	4.2984	4.3199	4.4115	4.3407	4.4632	4.4589	4.43	4.3966	4.5279	4.4632
pos_725	metab_719	metab_719	-	-	124.087	13.9944	pos	-	-	-	-	-	-	0.0062	4.9137	4.7076	4.8207	4.9052	4.9526	5.0965	4.8822	4.736	4.8957	4.9196	4.6907	4.9899	4.9801	4.673	4.6747	4.7401	4.7745	4.6535	4.7005	4.7886	4.7457	4.5822	4.8636	4.6721	4.7934	4.6035	4.59	4.8088	4.6273	4.7182	4.7306	4.7429	4.6864	4.7565	4.7591
pos_727	metab_721	metab_721	-	-	90.526	14.0144	pos	-	-	-	-	-	-	0.0089	5.9558	5.786	5.942	6.0223	6.0152	6.1047	5.9984	5.9196	6.0006	5.9559	5.8706	6.1012	6.1203	5.7714	5.7744	5.8482	5.871	5.7105	5.7638	5.8341	5.8289	5.6418	5.9316	5.7521	5.9207	5.6743	5.698	5.8647	5.7013	5.8643	5.8265	5.8373	5.7817	5.8332	5.8633
pos_728	metab_722	metab_722	-	-	186.043	14.0144	pos	-	-	-	-	-	-	0.0155	6.1995	6.0381	6.1554	6.1587	6.2621	6.3871	6.2976	6.1798	6.3004	6.2564	6.1077	6.367	6.3579	6.0623	6.0758	6.1019	6.0429	5.9347	6.0237	6.0631	6.0996	5.907	6.2155	6.0402	6.0653	5.8592	5.8668	6.0617	5.8411	6.0333	5.9961	5.9961	5.9384	6.088	6.1432
pos_730	metab_724	metab_724	-	-	102.034	14.0144	pos	-	-	-	-	-	-	0.0179	5.8876	5.767	5.8808	5.8647	5.9586	6.0799	6.0111	5.9155	6.0266	5.9625	5.8501	6.1	6.0827	5.7693	5.7824	5.8217	5.7872	5.6161	5.7449	5.7682	5.8409	5.6102	5.9288	5.7467	5.7767	5.5837	5.6098	5.7996	5.59	5.7891	5.725	5.7263	5.6601	5.8135	5.8732
pos_732	metab_726	metab_726	-	-	125.986	14.0144	pos	-	-	-	-	-	-	0.0106	6.3019	6.143	6.2748	6.3262	6.3504	6.4741	6.3673	6.2606	6.3671	6.3196	6.1958	6.4592	6.4537	6.1464	6.1374	6.1944	6.1902	6.0525	6.1122	6.1696	6.1773	5.9954	6.3051	6.1188	6.1975	5.9999	6.0079	6.198	6.0163	6.1799	6.1393	6.1383	6.0862	6.1815	6.2224
pos_736	metab_730	metab_730	-	-	230.139	13.9732	pos	-	-	-	-	-	-	0.0135	5.1656	4.9413	5.0379	5.1467	5.168	5.3105	5.1188	5.0044	5.103	5.1199	4.9762	5.2135	5.2381	4.9215	4.8946	4.9536	5.0034	4.9106	4.916	5.0099	4.9392	4.8222	5.0801	4.8885	5.0444	4.7942	4.7446	4.9983	4.8437	4.9509	4.9507	4.9226	4.8011	4.9573	4.9586
pos_737	metab_731	metab_731	-	-	265.176	13.8117	pos	-	-	-	-	-	-	0.0032	5.4808	5.2699	5.4189	5.5596	5.537	5.6376	5.4688	5.3385	5.4749	5.4461	5.2996	5.5392	5.6001	5.2642	5.2613	5.3392	5.366	5.2428	5.2452	5.3566	5.2746	5.1831	5.414	5.2571	5.3874	5.1497	5.1741	5.3579	5.2309	5.3437	5.3	5.3415	5.2701	5.309	5.3126
pos_738	metab_732	metab_732	-	-	232.115	13.7924	pos	-	-	-	-	-	-	0.0097	6.0726	5.8935	6.032	6.0791	6.1413	6.2521	6.0939	5.9875	6.118	6.0804	5.9603	6.2015	6.2326	5.8831	5.8774	5.9659	5.9441	5.8156	5.862	5.9618	5.9136	5.8157	6.0766	5.8914	5.9272	5.7218	5.7514	5.9478	5.7781	5.8982	5.8663	5.8818	5.8327	5.9517	5.9724
pos_739	metab_733	metab_733	-	-	255.064	3.4474	pos	-	-	-	-	-	-	0.0053	4.5329	4.2893	4.1713	3.6364	4.4917	3.6284	4.3744	4.3422	4.3038	4.2568	4.5044	4.0171	4.292	4.6238	4.5533	4.5858	6.1631	5.2918	4.4224	4.873	4.7366	7.1653	4.6598	4.8449	4.5551	4.2933	4.8119	4.1316	4.3544	4.4504	4.4294	4.4596	6.3356	6.292	6.2525
pos_740	metab_734	metab_734	-	-	130.065	3.4474	pos	-	-	-	-	-	-	0.0031	4.2655	4.5822	4.0247	3.9417	4.3122	3.9848	4.3824	5.228	5.0074	5.382	5.0423	4.7511	5.507	6.2043	6.0181	6.094	4.7074	5.6592	5.9055	5.0989	5.7657	5.6946	5.5613	5.7098	4.5341	5.2056	5.388	4.712	4.9634	4.892	5.0095	5.0076	5.6784	5.659	5.6492
pos_741	metab_735	metab_735	-	-	299.184	3.4055	pos	-	-	-	-	-	-	0.0072	3.4513	4.3182	3.6256	2.4596	2.535	2.4724	3.4634	4.1318	3.2701	3.5785	4.4211	2.5143	2.5415	4.4317	4.4905	4.3315	3.6603	4.3735	4.3405	4.3419	4.2208	4.4921	3.1267	4.3894	3.9256	4.8902	4.7341	4.2488	4.9212	4.4708	4.5914	4.5861	4.4242	4.3648	4.3493
pos_742	metab_736	metab_736	-	-	387.164	3.3447	pos	-	-	-	-	-	-	0.0086	3.1893	4.2632	3.1503	2.6004	2.6758	2.6132	2.7514	3.8402	3.2351	2.7749	3.1811	2.6551	2.6823	3.9778	3.994	3.7667	3.6295	3.7019	3.9182	3.7726	4.1336	3.7156	3.5428	4.1945	4.0234	5.0009	4.7754	4.3455	4.7635	4.5401	4.6252	4.6221	4.2157	4.2297	4.2681
pos_743	metab_737	metab_737	-	-	478.263	3.3245	pos	-	-	-	-	-	-	0.0053	3.5583	5.2949	3.6204	3.5341	3.1715	3.1088	3.448	4.1543	4.543	3.2707	4.0908	3.1508	3.178	5.1961	5.0991	4.9846	4.4001	4.3136	5.4726	4.387	4.4338	5.3059	3.2602	5.0077	4.5398	5.7145	5.5808	4.5203	4.9683	5.186	5.3474	5.2914	5.1036	5.1286	5.0649
pos_744	metab_738	metab_738	-	-	450.232	3.3245	pos	-	-	-	-	-	-	0.0041	4.6613	5.5484	4.4568	4.5355	3.1767	4.2787	4.6316	4.7994	5.3499	4.4876	4.6039	4.7236	4.2914	5.3319	5.2916	5.2327	4.9716	4.1669	5.6647	4.9247	5.0781	5.3901	4.5653	5.3153	5.3366	6.0028	5.7895	5.2796	5.333	5.6289	5.7244	5.7235	5.4504	5.4476	5.4536
pos_745	metab_739	metab_739	-	-	254.138	3.2411	pos	-	-	-	-	-	-	0.01	3.6822	3.9442	3.2089	2.9076	3.5617	2.9204	3.6361	3.6572	3.7316	3.7199	4.0565	3.3666	3.6628	4.1983	4.1286	4.0199	3.6756	3.9757	4.0565	3.8027	4.0316	3.9856	3.5888	4.0292	3.9197	4.5626	4.398	4.0819	4.7758	4.3364	4.4592	4.3807	4.2059	4.0996	4.1806
pos_746	metab_740	metab_740	-	-	444.221	3.2827	pos	-	-	-	-	-	-	0.0049	3.9132	2.9825	3.6556	2.7196	2.795	3.5554	3.8556	3.5274	3.2754	4.1765	3.1181	3.2569	3.8075	3.0748	3.0567	3.0641	3.6878	3.1921	3.0223	3.4866	3.058	3.0137	3.7037	3.2858	4.2093	4.4588	4.2898	4.4372	4.55	4.2642	4.4241	4.3217	3.7391	3.6943	3.7326
pos_747	metab_741	metab_741	-	-	251.13	3.3032	pos	-	-	-	-	-	-	0.0032	5.2184	5.4764	5.2538	5.1222	5.2569	5.1228	5.1712	5.3374	5.0944	5.127	5.1877	5.1476	5.1643	5.3687	5.2785	5.3051	5.2369	5.3995	5.4219	5.4562	5.3953	5.2889	5.2	5.4469	5.2395	5.3491	5.2063	5.1364	5.179	5.1949	5.2385	5.1914	5.3138	5.31	5.2717
pos_748	metab_742	metab_742	-	-	485.14	3.2411	pos	-	-	-	-	-	-	0.0136	4.3777	3.871	4.0648	2.4187	2.4941	2.4315	2.5696	4.0549	3.8775	4.0931	4.3742	2.4734	3.045	4.9352	4.7904	4.7371	3.7374	4.374	4.7379	3.8765	3.8201	3.8863	2.8532	4.3745	2.601	3.2323	3.7243	2.8438	2.8298	2.743	2.7788	2.7668	4.2606	4.1614	4.3143
pos_749	metab_743	metab_743	-	-	525.163	3.2411	pos	-	-	-	-	-	-	0.0075	3.0123	4.4628	3.8296	0.0087	3.4576	0.0089	3.8232	4.2545	3.2952	3.7209	4.4453	3.354	0.0105	4.6649	4.5514	4.4707	3.989	4.149	4.3559	4.4828	4.394	0.0169	4.0786	4.495	4.2119	5.045	4.8367	4.4875	4.8101	4.6409	4.7574	4.6929	4.58	4.5237	4.5791
pos_750	metab_744	metab_744	-	-	473.198	3.2411	pos	-	-	-	-	-	-	0.0015	4.2879	4.8169	3.6716	3.044	3.6358	3.0568	4.4808	4.7957	4.3883	3.5371	5.0047	3.0988	3.126	4.5348	4.5808	4.3564	4.3904	4.112	4.83	4.4189	4.8699	4.4224	4.0712	4.9488	4.3682	5.3407	5.3362	4.546	5.3994	4.85	5.0231	4.928	4.7621	4.7678	4.7509
pos_751	metab_745	metab_745	-	-	168.101	3.2411	pos	-	-	-	-	-	-	0.0059	3.8635	3.6721	3.6215	3.8105	3.6758	3.7413	3.6909	3.6421	3.7328	3.781	3.7284	3.8366	3.7619	4.7196	4.3357	4.4237	3.6257	3.7006	3.8311	3.7502	3.6267	4.4936	3.6801	3.6117	3.7047	3.5601	3.5313	3.6284	3.4903	3.6005	3.555	3.6293	3.936	3.8867	3.9123
pos_752	metab_746	metab_746	-	-	415.163	3.2411	pos	-	-	-	-	-	-	0.0122	3.9332	4.3843	3.8515	3.1497	3.5515	3.1625	3.6191	4.3204	4.0131	4.2445	4.6749	3.2045	3.3238	4.5886	4.5883	4.5135	4.0079	3.9793	4.5831	4.1975	4.2626	4.4546	3.9842	4.4752	4.0353	4.7608	4.7954	4.2801	4.9062	4.4907	4.7069	4.6627	4.4855	4.4174	4.56
pos_753	metab_747	metab_747	-	-	314.137	3.2206	pos	-	-	-	-	-	-	0.0051	2.5808	3.5311	3.1099	2.4271	2.5025	2.4399	3.0531	3.5276	3.1511	3.3103	3.5606	2.4818	3.1474	3.8135	3.8584	3.6446	4.07	3.4589	3.712	3.5551	3.3533	5.6088	3.1378	3.4168	3.2023	3.7237	3.8468	3.4336	3.9497	3.6035	3.7021	3.5816	4.5478	4.5235	4.5461
pos_754	metab_748	metab_748	-	-	209.117	3.2001	pos	-	-	-	-	-	-	0.0023	4.6911	5.1493	4.6315	4.2652	4.4613	4.1604	4.6756	4.9813	4.8465	4.8631	5.0398	4.5863	4.6842	5.3019	5.2542	5.2262	4.8677	4.9478	5.2134	5.0845	5.1632	5.4126	4.923	5.1847	4.9758	5.5648	5.387	4.9642	5.3399	5.1908	5.2847	5.2561	5.2231	5.1936	5.2044
pos_755	metab_749	metab_749	-	-	211.132	3.2827	pos	-	-	-	-	-	-	0.0021	5.0088	5.4563	4.9759	4.9676	4.9004	4.9483	4.9883	5.0722	5.0752	5.0527	5.0976	5.0087	5.0163	5.393	5.3822	5.3335	5.0743	4.9875	5.3582	5.1492	5.1737	5.4119	5.0441	5.2637	5.3833	5.7332	5.4629	5.1825	5.3962	5.4321	5.4897	5.4251	5.3337	5.3318	5.3104
pos_756	metab_750	metab_750	-	-	383.063	3.2001	pos	-	-	-	-	-	-	0.0081	4.9205	5.1736	5.1782	4.542	5.091	4.1509	5.1331	5.1673	4.8074	4.9377	5.1365	5.0472	5.1647	5.199	5.1117	5.1959	5.1951	5.0638	5.031	5.3551	5.2136	4.4326	5.1415	5.1911	5.0423	5.1048	4.9754	5.0131	4.8692	5.0986	5.103	5.136	5.1642	5.1443	5.2027
pos_757	metab_751	metab_751	-	-	297.168	3.2206	pos	-	-	-	-	-	-	0.0081	2.5414	4.0453	2.5186	2.3879	2.4632	2.4007	2.8545	3.5443	2.6355	3.3445	4.3044	2.4425	2.4696	4.5307	4.4833	4.3659	3.2953	3.8636	4.1646	3.795	4.2686	4.5164	2.7567	4.3356	3.6215	4.8398	4.6431	4.1655	4.7278	4.4113	4.5651	4.4825	4.2974	4.354	4.2565
pos_758	metab_752	metab_752	-	-	311.115	3.2001	pos	-	-	-	-	-	-	0.0129	3.3428	3.4798	2.895	3.1864	3.2408	3.0761	3.1604	4.086	4.4175	4.141	3.4215	4.1817	4.3789	4.2949	4.4344	3.6958	3.3217	3.3022	4.0978	4.1364	3.7421	3.8151	3.7988	4.1681	3.8476	4.4218	4.3449	3.7724	4.1576	4.1259	4.3532	4.1118	3.9285	4.0217	4.0712
pos_759	metab_753	metab_753	-	-	264.126	3.1787	pos	-	-	-	-	-	-	0.0067	4.1422	4.2436	4.1319	4.3048	4.3162	4.2395	3.9527	4.1322	4.2223	4.1924	4.4269	4.174	4.3457	4.4708	4.4246	4.3757	4.1833	4.3619	4.4295	4.3831	4.3106	4.4611	4.0647	4.3948	4.1641	4.6297	4.4127	4.0576	4.3322	4.2684	4.3079	4.3331	4.3366	4.32	4.3234
pos_760	metab_754	metab_754	-	-	309.226	3.2001	pos	-	-	-	-	-	-	0.0017	4.9347	4.874	4.8812	5.0125	4.9443	5.0265	4.8891	4.8449	4.9401	4.9643	4.9231	4.9939	4.9957	4.9854	5.0039	4.9703	4.8721	4.8663	4.8158	4.8785	4.8851	5.0084	4.821	4.862	4.9595	5.0464	5.0999	4.9523	5.123	4.9993	5.0249	5.026	4.9772	4.9834	4.9814
pos_761	metab_755	metab_755	-	-	293.137	3.1575	pos	-	-	-	-	-	-	0.0038	3.7567	4.3825	3.7985	2.6199	3.8388	2.6328	3.7234	4.2358	3.7479	4.0561	4.1187	3.6355	3.1678	4.4955	4.4534	4.422	4.0746	4.5456	4.4009	4.4503	4.4317	4.8549	4.1378	4.5034	3.9248	4.6244	4.5354	4.2569	4.5777	4.3747	4.4859	4.4169	4.413	4.4224	4.4382
pos_762	metab_756	metab_756	-	-	191.142	3.1575	pos	-	-	-	-	-	-	0.0027	4.2768	4.6002	4.2455	3.7737	4.1412	3.675	4.3275	4.5609	4.4222	4.4305	4.7112	4.0659	4.1843	4.8414	4.772	4.7611	4.3429	4.352	4.624	4.4522	4.5495	4.7934	4.2969	4.6128	4.6001	5.1419	5.0723	4.7059	5.0486	4.8284	4.9237	4.9056	4.74	4.7338	4.7564
pos_764	metab_758	metab_758	-	-	307.014	3.1368	pos	-	-	-	-	-	-	0.0143	4.9879	4.0602	4.8702	4.2427	4.9457	5.1668	4.7105	4.1704	4.5338	4.7894	4.0216	4.6937	4.8468	2.462	3.6521	2.4513	4.524	3.5481	2.4096	4.1596	4.1704	2.401	4.1137	3.3885	4.7385	2.8212	2.4887	4.4546	3.9892	3.917	3.5326	3.4978	4.1685	4.1144	4.2352
pos_765	metab_759	metab_759	-	-	223.168	3.0965	pos	-	-	-	-	-	-	0.0045	3.9817	4.0698	3.9076	3.7772	3.9586	3.6891	4.119	4.2234	4.0043	3.7241	4.4136	3.8381	4.0401	4.2627	4.182	4.1363	3.9667	3.9764	4.1443	4.1602	4.2944	4.1181	3.6748	4.2819	3.9155	4.3296	4.3611	4.0808	4.5547	4.0979	4.1694	4.1997	4.1657	4.1473	4.1664
pos_766	metab_760	metab_760	-	-	348.143	3.1164	pos	-	-	-	-	-	-	0.004	4.9181	4.9208	4.8672	3.0891	3.8766	3.7744	4.4513	4.93	4.6738	5.0524	5.0138	4.2804	4.4161	5.4012	5.3498	5.3025	4.7268	5.0715	5.4378	4.8123	4.8978	5.5603	4.8886	5.1447	3.9273	4.5841	4.8788	4.3479	4.5836	4.2818	4.227	4.3607	5.0635	5.0763	5.079
pos_767	metab_761	metab_761	-	-	363.164	3.0965	pos	-	-	-	-	-	-	0.0056	4.1483	4.8431	4.1158	3.5028	3.8001	3.6418	4.5633	4.7121	4.8271	4.6029	4.8177	4.0061	4.1089	4.9053	5.0126	4.9761	4.3801	4.1076	4.8535	4.4832	4.714	4.503	4.2482	4.7816	4.5512	5.2772	5.2539	4.527	5.2833	5.0444	5.1538	5.0917	4.8716	4.8611	4.8947
pos_768	2-oxo capric acid	metab_762	LMFA01060001	-	169.122	3.0965	pos	M+H-H2O, M+H	C10H18O3	60	-	-3.14914	-	0.0029	4.1544	4.6113	4.1374	3.7237	4.0207	3.8489	4.4553	4.5623	4.6424	4.2896	4.6102	4.0145	4.0649	4.5193	4.5971	4.4653	4.2961	4.1321	4.6197	4.3641	4.5686	4.3502	4.1668	4.5814	4.4837	5.0384	4.998	4.4203	5.0507	4.7574	4.8667	4.8268	4.6336	4.6376	4.6519
pos_769	metab_763	metab_763	-	-	141.127	3.1164	pos	-	-	-	-	-	-	0.0024	4.495	4.8634	4.4635	4.1406	4.3694	4.1707	4.6386	4.7735	4.8187	4.577	4.8317	4.3411	4.4074	4.8242	4.8502	4.7704	4.5362	4.5288	4.8702	4.6843	4.7992	4.7243	4.4878	4.8344	4.6997	5.205	5.1522	4.6663	5.1818	4.92	5.0457	5.0014	4.8719	4.8594	4.8714
pos_770	metab_764	metab_764	-	-	253.154	3.0763	pos	-	-	-	-	-	-	0.0074	4.0135	4.4079	3.7642	2.9443	3.6041	2.9452	4.0505	4.3434	3.9268	3.8992	4.2891	3.3593	3.5682	4.2795	4.2681	4.248	4.1708	4.0296	4.5057	4.2092	4.347	4.2888	3.9937	4.3752	3.7756	4.5212	4.5613	4.076	4.6564	4.2698	4.3989	4.3072	4.3362	4.3313	4.2572
pos_771	metab_765	metab_765	-	-	432.258	3.0355	pos	-	-	-	-	-	-	0.0062	3.6929	4.2906	3.517	2.9409	3.0164	2.9537	3.6394	4.1905	3.8446	3.426	4.1229	2.9957	3.4457	4.2534	4.2415	4.0603	3.9718	3.8439	4.1524	4.3517	4.2476	4.1402	4.0176	4.2768	3.6481	4.6064	4.6509	4.0162	4.5977	4.3624	4.4736	4.447	4.3024	4.2554	4.2408
pos_772	metab_766	metab_766	-	-	214.143	3.0763	pos	-	-	-	-	-	-	0.0153	3.6516	3.8406	3.2883	2.3758	2.4511	2.3886	3.1765	3.7463	3.374	3.3936	3.8417	2.8528	2.7746	4.0946	4.0073	4.0892	3.3677	3.849	3.9422	3.6905	3.7318	4.0334	3.3465	3.8349	3.1921	4.239	4.0332	3.763	4.1472	3.7602	3.8796	3.9673	3.9194	3.8773	3.7641
pos_773	metab_767	metab_767	-	-	241.203	3.0355	pos	-	-	-	-	-	-	0.0025	4.7861	4.8037	4.771	4.8961	4.8315	4.8844	4.7558	4.5359	4.7994	4.7817	4.6861	4.8356	4.9131	4.3412	4.6149	4.4141	4.6471	4.6512	4.4	4.4965	4.6726	4.4986	4.6961	4.4812	4.9042	4.254	4.5803	4.7811	4.3564	4.699	4.4706	4.6969	4.5744	4.5757	4.5663
pos_774	metab_768	metab_768	-	-	484.253	3.0154	pos	-	-	-	-	-	-	0.0137	3.1853	3.5198	2.7725	2.6415	2.717	2.6543	2.7926	3.4668	3.7121	3.1517	4.0435	2.6963	2.7234	4.0928	4.0362	3.743	3.2779	2.8652	3.9022	2.9252	3.4179	2.9356	2.8055	3.5491	3.9671	4.8869	4.7731	3.7461	4.7093	4.3931	4.537	4.4793	4.0558	4.0642	3.927
pos_775	metab_769	metab_769	-	-	239.138	2.9537	pos	-	-	-	-	-	-	0.0049	5.3896	5.5969	5.4561	4.5964	5.4113	4.678	5.5527	5.6691	5.0301	5.3555	5.7039	5.0672	5.1996	5.6361	5.6325	5.584	5.6554	5.8739	5.7438	5.7621	5.8845	5.8073	5.5799	5.6388	5.1804	5.7566	5.6183	5.319	5.6794	5.2666	5.4005	5.4395	5.6545	5.6054	5.6107
pos_776	metab_770	metab_770	-	-	429.172	2.9537	pos	-	-	-	-	-	-	0.0074	3.6796	4.2608	3.6741	2.7122	2.7877	2.725	2.8633	4.2089	4.6126	4.0366	4.2859	3.3169	3.8672	4.795	4.877	4.5789	3.8815	4.023	4.8878	4.5526	4.3064	4.4834	3.8128	4.6502	3.7403	4.9371	4.6098	3.9065	4.8324	4.3997	4.6554	4.5636	4.6046	4.5305	4.593
pos_777	metab_771	metab_771	-	-	294.133	2.9343	pos	-	-	-	-	-	-	0.0043	3.9576	4.5841	3.547	3.1309	3.7306	3.1438	3.5649	4.1596	3.7269	3.6432	4.2565	3.3075	3.213	4.6792	4.5734	4.5405	3.9919	4.1943	4.767	4.131	4.521	4.6747	3.6443	4.6251	4.0208	4.8658	4.7527	3.9378	4.6123	4.5185	4.6424	4.6135	4.522	4.5123	4.5573
pos_778	metab_772	metab_772	-	-	285.054	2.9343	pos	-	-	-	-	-	-	0.0079	4.4559	4.7051	4.8322	3.8795	4.7219	3.5259	4.3997	4.806	4.8975	4.6419	4.9077	4.4987	4.6355	5.0315	4.9365	5.0166	4.9624	5.0114	5.0462	4.8012	4.7311	4.6207	4.7027	4.9025	4.0709	4.3666	4.2604	4.6722	4.4407	4.4013	4.5008	4.542	4.8751	4.8407	4.936
pos_779	metab_773	metab_773	-	-	245.049	2.9343	pos	-	-	-	-	-	-	0.004	4.9923	4.7344	5.0884	4.5586	4.6945	5.419	4.8845	4.5103	4.5703	4.7859	4.2234	4.6529	4.6062	4.2371	4.5954	4.092	4.8421	4.4015	4.3883	4.7246	4.7008	3.9997	4.4286	4.5365	5.0477	3.9434	4.166	4.8568	4.5018	4.3711	4.2243	4.3993	4.6046	4.5796	4.6185
pos_780	3-Methyl-1-phenyl-1-butanone	metab_774	-	-	163.111	2.9343	pos	M+H-H2O, M+H	C11H14O	62	-	-3.04246	-	0.0026	4.5078	4.869	4.7305	3.9915	4.5623	3.9347	4.4816	4.8463	4.8283	4.6218	5.0845	4.3976	4.5658	5.3518	5.2522	5.2345	4.909	5.2528	5.432	4.8765	4.8816	5.0003	4.6309	5.1747	4.483	5.0009	4.8546	4.8035	4.987	4.7262	4.8324	4.8457	5.0453	5.0135	5.0393
pos_781	metab_775	metab_775	-	-	398.148	2.8933	pos	-	-	-	-	-	-	0.0071	3.4472	4.5098	3.9475	3.1505	3.7719	3.1634	4.1591	4.3475	3.8238	4.1019	4.4235	3.539	3.9035	4.5884	4.6134	4.5865	4.2195	4.587	4.3397	4.4495	4.614	3.5409	4.1395	4.6146	3.8341	4.4721	4.274	4.1013	4.3419	4.104	4.2693	4.1694	4.3941	4.4341	4.3669
pos_782	metab_776	metab_776	-	-	466.169	2.9343	pos	-	-	-	-	-	-	0.008	3.4159	4.5058	3.2517	3.1206	3.5274	3.1334	3.2718	4.2776	3.3558	3.9899	4.403	3.6239	3.3528	4.956	4.8673	4.8093	3.6419	4.6642	4.621	4.3053	4.7507	4.4398	4.1262	4.6245	4.0563	4.7098	4.3387	4.2811	4.347	4.3048	4.425	4.2943	4.5037	4.5605	4.6055
pos_783	metab_777	metab_777	-	-	147.043	2.8933	pos	-	-	-	-	-	-	0.0015	3.4949	4.1861	3.8249	3.1639	3.5633	2.6348	3.9492	4.0316	3.2544	3.7227	4.2017	3.6111	3.8085	4.3843	4.3076	4.3214	3.8565	4.2367	4.0892	4.1751	4.1947	3.4693	3.8175	4.2199	3.7091	4.2272	4.0615	3.8182	4.0748	3.896	4.0346	3.9775	4.1129	4.0981	4.0978
pos_784	metab_778	metab_778	-	-	243.087	2.9137	pos	-	-	-	-	-	-	0.005	4.8161	4.6722	4.9166	3.9737	5.0478	3.9475	4.6307	5.1332	4.6908	4.5951	5.1983	4.1712	4.3498	4.5176	4.6927	4.5053	4.5679	4.9759	4.8823	5.0589	4.7891	4.9873	4.7931	5.0999	4.5882	4.6874	4.7365	4.7816	5.3136	4.787	4.9234	4.8254	4.7482	4.7501	4.8041
pos_785	metab_779	metab_779	-	-	226.143	2.8933	pos	-	-	-	-	-	-	0.0072	3.9247	4.5074	4.0262	3.3779	3.8399	2.8963	4.0308	4.4154	4.4341	4.3224	4.6905	3.8579	3.9863	4.6295	4.6927	4.5813	4.2041	4.2956	4.643	4.4359	4.2884	4.5291	4.0792	4.488	4.5865	4.8189	4.8389	4.6179	4.9292	4.6472	4.7398	4.6846	4.605	4.5386	4.601
pos_786	metab_780	metab_780	-	-	447.091	2.8933	pos	-	-	-	-	-	-	0.0024	5.3626	5.9054	5.2992	4.7626	5.2962	4.8508	5.0451	5.8151	5.6773	5.4242	5.597	5.2056	5.3809	5.9221	5.863	5.8504	5.5303	5.8527	6.0862	5.8197	5.9654	4.9659	5.6704	6.0507	5.5678	6.304	6.1503	5.8872	5.9377	5.9207	6.0004	5.9889	5.8909	5.8762	5.9114
pos_787	metab_781	metab_781	-	-	144.08	2.6685	pos	-	-	-	-	-	-	0.0028	4.4508	4.5941	4.4799	4.3998	4.4718	4.43	4.4781	4.5621	4.489	4.5259	4.6119	4.4904	4.4643	4.773	4.7353	4.7166	4.4955	4.685	4.7023	4.671	4.6336	4.7795	4.5321	4.6939	4.5425	4.6847	4.6647	4.5202	4.6952	4.5983	4.645	4.5838	4.6644	4.6513	4.6318
pos_788	metab_782	metab_782	-	-	240.122	2.6685	pos	-	-	-	-	-	-	0.0043	4.347	4.8857	4.4108	3.4613	4.2475	3.6819	4.3179	4.7416	4.3357	4.4956	4.7584	4.275	4.1957	4.9758	4.9242	4.888	4.4906	4.9216	4.9077	4.8786	4.986	5.0826	4.4434	5.0263	4.7097	5.0481	4.9741	4.6225	4.9561	4.7887	4.9062	4.8065	4.8852	4.86	4.8314
pos_789	L-Tryptophan	metab_783	HMDB0000929	C00078	205.096	2.6685	pos	M+H-H2O, M+H	C11H12N2O2	88.5	-	-2.95416	73-22-3	0.0063	4.851	5.0827	4.9548	4.1538	4.7903	4.299	4.7911	5.1872	4.9142	4.9688	5.2854	4.6587	4.6486	5.2827	5.2467	5.2138	5.0787	5.4105	5.3567	5.2529	5.1221	5.3577	5.0375	5.2663	4.9041	5.1607	5.2438	4.9651	5.1803	4.9914	5.0791	5.0111	5.2133	5.1676	5.1493
pos_790	metab_784	metab_784	-	-	201.102	2.6879	pos	-	-	-	-	-	-	0.0044	4.9686	5.2729	5.0561	4.1995	5.0656	4.4734	5.0397	5.3853	5.1761	5.1781	5.4861	4.8196	4.7089	5.4161	5.4467	5.3578	5.3203	5.5376	5.4848	5.4728	5.3659	5.5868	5.2809	5.4696	5.1408	5.3991	5.5231	5.1746	5.4521	5.244	5.332	5.2594	5.4077	5.3734	5.3536
pos_791	metab_785	metab_785	-	-	197.128	2.6481	pos	-	-	-	-	-	-	0.0069	4.1255	4.3706	3.8777	3.6277	3.9097	3.7361	4.091	4.3341	4.0498	3.9802	4.218	3.7599	3.8123	4.3363	4.272	4.1995	4.1814	4.0058	4.4326	4.1042	4.2241	4.378	4.0757	4.2935	4.0727	4.5858	4.5149	4.123	4.5991	4.34	4.4309	4.4103	4.3404	4.3038	4.2958
pos_792	metab_786	metab_786	-	-	239.138	2.6481	pos	-	-	-	-	-	-	0.0046	5.1257	5.4841	4.9853	4.3289	4.9469	4.3944	5.1915	5.3996	5.0788	5.0394	5.3416	4.6961	4.8069	5.4503	5.3918	5.3378	5.2703	5.1262	5.5543	5.2499	5.3755	5.5449	5.1523	5.4211	5.1053	5.7262	5.6533	5.2364	5.7229	5.4326	5.5543	5.5258	5.4667	5.4331	5.4233
pos_793	metab_787	metab_787	-	-	221.08	2.6275	pos	-	-	-	-	-	-	0.016	2.2323	2.9337	2.2096	2.0793	2.1543	2.092	2.9501	2.5885	2.5522	2.2529	2.7251	2.1337	2.1607	3.2536	3.3653	2.9756	2.2669	3.6797	3.6032	3.0448	3.3609	3.7165	2.4708	3.4004	3.2934	4.2934	4.2307	3.7302	4.2022	3.8257	4.0567	3.9741	3.6016	3.5095	3.5379
pos_794	metab_788	metab_788	-	-	129.979	2.6061	pos	-	-	-	-	-	-	0.008	4.4328	4.1055	4.4698	4.6627	4.5737	4.6965	4.4794	4.2862	4.4591	4.4428	4.1453	4.6134	4.6113	4.0345	3.9982	4.1642	4.3822	4.0872	4.0144	4.2373	4.1409	3.8065	4.4179	4.0191	4.4963	3.9488	4.0262	4.4018	4.0708	4.3623	4.2384	4.3068	4.2463	4.2468	4.231
pos_795	metab_789	metab_789	-	-	175.148	2.6061	pos	-	-	-	-	-	-	0.0038	3.41	3.9852	3.383	3.0852	3.3837	3.098	3.6084	3.8273	3.2337	3.6987	3.9666	3.2953	3.5006	4.7003	4.4921	4.5328	3.564	3.9502	3.9676	4.0318	4.2225	4.6465	3.5146	4.2017	4.046	4.8924	4.496	4.3019	4.4996	4.4604	4.5097	4.4921	4.4277	4.3889	4.4104
pos_796	7-Hydroxyenterolactone	metab_790	HMDB0041703	-	315.122	2.5647	pos	M+H-H2O, M+H	C18H18O5	54.4	-	-3.82767	-	0.0039	4.6191	4.8301	4.6682	3.8853	4.3097	3.5793	4.4616	4.8438	4.5793	4.8049	5.0449	4.3641	4.5187	5.0971	5.0566	5.0073	4.7392	5.1618	5.1396	5.0306	4.9566	4.5463	4.6453	5.1271	4.5295	4.9486	4.8536	4.7753	4.6159	4.5997	4.652	4.6649	4.8861	4.8633	4.914
pos_797	metab_791	metab_791	-	-	883.994	2.5437	pos	-	-	-	-	-	-	0.0095	4.2106	4.4835	4.2554	3.8704	4.6245	4.0421	4.3486	4.8826	4.3879	4.6786	5.007	4.0878	4.419	4.3577	4.566	4.5021	4.9883	5.0262	4.7181	5.0236	5.0791	4.9835	4.7779	5.057	4.1918	4.5035	4.8464	4.131	4.8822	4.4414	4.5418	4.5814	4.6037	4.6125	4.7145
pos_798	metab_792	metab_792	-	-	135.08	2.5234	pos	-	-	-	-	-	-	0.0071	3.2592	3.6095	3.1933	2.8319	3.1808	2.6956	3.3833	3.4723	3.2213	3.47	3.6098	3.1064	3.1243	3.8934	3.8167	3.6809	3.4108	3.4623	3.7113	3.5949	3.7183	3.8541	3.2686	3.6624	3.3976	4.0891	3.9251	3.7055	3.9497	3.7266	3.9169	3.8271	3.7557	3.6827	3.7309
pos_799	metab_793	metab_793	-	-	298.127	2.4822	pos	-	-	-	-	-	-	0.0264	1.7612	3.4729	3.2273	2.8417	2.6971	1.6228	3.3538	2.6987	1.7558	2.8521	3.3186	2.2922	1.6905	3.3349	1.942	3.2483	3.0551	1.83	3.1093	2.9499	1.8898	3.2297	2.8078	2.7904	3.9846	4.3428	4.2042	3.8913	4.2977	4.1363	4.2328	4.1877	3.5901	3.739	3.5914
pos_800	Baicalin	metab_794	HMDB0041832;LMPK12111081	C10025	447.091	2.5234	pos	M+H, 2M+H	C21H18O11	82.5	-	-3.03365	21967-41-9	0.0012	6.3712	6.5628	6.1247	5.7273	6.2297	5.6707	6.2347	6.565	6.2532	6.2684	6.4405	5.9663	5.9751	6.5817	6.5729	6.5255	6.3937	6.4241	6.8011	6.396	6.7344	3.2695	6.4271	6.7615	6.2759	6.809	6.6365	6.4147	6.6314	6.5409	6.6157	6.5912	6.5508	6.5402	6.5306
pos_801	metab_795	metab_795	-	-	281.174	2.4822	pos	-	-	-	-	-	-	0.0035	4.0941	4.1708	3.9017	2.8019	3.091	2.8147	3.8814	4.2608	4.024	3.9669	4.34	3.5594	3.7223	4.441	4.384	4.4301	4.1434	4.3505	4.2785	4.1597	4.0654	4.4454	3.8145	4.2366	3.8753	4.6069	4.5098	4.2994	4.6835	4.3259	4.3289	4.4255	4.3892	4.353	4.3583
pos_802	Genipin	metab_796	HMDB0035830	C09780	191.07	2.4629	pos	M+H-2H2O, 2M+K	C11H14O5	-	52.7	-3.11265	6902-77-8	0.0116	4.1537	4.3917	4.0291	3.2184	3.7844	3.4369	4.1576	4.4206	4.1578	4.134	4.415	3.6966	3.6667	4.5045	4.5539	4.4399	4.1493	4.2014	4.5785	4.2884	4.4512	4.1944	4.2237	4.5169	4.1286	4.6747	4.7638	4.1688	4.7297	4.4682	4.6036	4.521	4.4326	4.464	4.4611
pos_803	metab_797	metab_797	-	-	206.081	2.4433	pos	-	-	-	-	-	-	0.0031	3.733	3.7719	3.947	2.3425	3.8312	2.9651	3.4472	3.8703	3.4411	3.3461	3.7873	3.1867	3.6053	3.9658	3.9108	3.9211	3.7012	4.2061	4.0601	3.8291	3.685	4.153	3.7157	3.9285	3.6031	4.1706	3.9539	3.8087	4.1875	3.8386	3.9757	3.9025	3.9137	3.9423	3.9136
pos_804	metab_798	metab_798	-	-	352.16	2.4433	pos	-	-	-	-	-	-	0.0033	4.2251	4.3857	4.1486	2.7337	3.7554	3.2442	4.1373	4.4911	4.4192	4.4366	4.5566	4.0305	4.0101	4.4483	4.6782	4.5741	4.3657	4.5636	4.7214	4.6878	4.5412	4.5955	4.4304	4.6313	3.6393	4.4202	4.3402	4.205	4.304	4.1601	4.2465	4.2472	4.5398	4.5239	4.499
pos_805	metab_799	metab_799	-	-	147.08	2.4433	pos	-	-	-	-	-	-	0.0018	4.4424	4.5063	4.3734	4.1722	4.3106	4.21	4.4466	4.4982	4.3955	4.4902	4.5934	4.2917	4.3264	4.6516	4.6456	4.6546	4.4904	4.592	4.6718	4.5053	4.4309	4.5963	4.4462	4.5441	4.3085	4.6109	4.6093	4.4684	4.6596	4.5061	4.548	4.5007	4.5435	4.5493	4.5418
pos_806	metab_800	metab_800	-	-	194.065	2.4433	pos	-	-	-	-	-	-	0.0012	4.1833	4.2062	4.1493	3.087	3.6161	3.2335	4.1057	4.4022	4.2437	4.0508	4.5144	3.6314	3.5777	4.4629	4.4749	4.3821	4.2363	5.0283	4.6655	4.6695	4.4193	3.3814	4.085	4.6438	3.5265	4.2931	4.2905	4.1087	4.0965	3.9839	3.9799	4.0254	4.3067	4.3155	4.3208
pos_807	metab_801	metab_801	-	-	891.22	2.4433	pos	-	-	-	-	-	-	0.0042	5.7423	5.5328	5.743	4.543	5.3744	4.9369	5.6302	5.7109	5.7702	5.6751	5.7774	5.3387	5.3421	5.5074	5.6337	5.652	5.7146	5.6695	5.6711	5.8649	5.7377	4.8375	5.7496	5.6925	4.9096	5.422	5.5136	5.6338	5.2644	5.3649	5.3758	5.3797	5.6604	5.6453	5.5977
pos_808	metab_802	metab_802	-	-	514.039	2.4433	pos	-	-	-	-	-	-	0.0118	4.4663	4.2577	4.4202	3.5182	4.1563	3.7693	4.3216	4.3694	4.4116	4.3675	4.4363	4.1815	4.1097	3.9888	4.2737	4.2677	4.3903	4.336	4.3591	4.549	4.3574	4.704	4.414	4.3183	3.7757	3.9634	4.2084	4.3763	3.9982	4.2242	4.171	4.1475	4.3544	4.2537	4.3468
pos_809	metab_803	metab_803	-	-	295.152	2.4219	pos	-	-	-	-	-	-	0.0036	3.5435	3.941	2.7122	2.5813	3.052	2.5941	3.7303	3.8053	3.2413	3.8207	4.0017	2.636	2.8715	4.0736	4.1509	3.9792	3.456	3.9489	4.0504	3.604	3.9242	3.8578	3.578	3.9942	2.98	4.5061	4.4937	4.0815	4.5161	4.1648	4.3798	4.3327	4.0766	4.1066	4.1025
pos_810	metab_804	metab_804	-	-	258.169	2.4219	pos	-	-	-	-	-	-	0.0057	3.7698	4.3886	3.6453	2.5782	3.319	2.591	3.9498	3.6434	3.1892	3.6635	4.0664	3.6011	3.2344	4.0652	4.2829	4.2559	3.9715	3.7529	4.1421	3.8571	4.0857	3.909	3.602	3.9835	3.804	4.3861	4.2146	3.9919	4.7353	4.4131	4.1987	4.4607	4.2879	4.2531	4.2832
pos_811	metab_805	metab_805	-	-	593.142	2.4433	pos	-	-	-	-	-	-	0.0181	4.2746	4.1072	4.3408	3.3738	4.066	3.6737	4.2517	4.2547	4.2876	4.2717	4.3555	3.9567	4.011	4.346	4.3449	4.471	4.2887	4.2287	4.1319	4.4115	4.3316	2.3665	4.3156	4.2973	3.4608	3.8576	3.985	4.2158	3.8436	3.8963	3.9048	3.9255	4.3003	4.1919	4.0905
pos_812	metab_806	metab_806	-	-	156.01	2.4219	pos	-	-	-	-	-	-	0.0038	4.1956	4.0363	4.277	4.4637	4.3498	4.475	4.2311	4.13	4.1845	4.2102	4.0163	4.3604	4.3368	4.1446	4.0379	4.07	4.2215	4.4438	4.1635	4.1704	4.0044	4.8654	4.221	4.0519	4.2276	3.9052	3.8884	4.1396	3.9398	4.138	4.0401	4.0732	4.1365	4.1314	4.1027
pos_813	metab_807	metab_807	-	-	186.148	2.4219	pos	-	-	-	-	-	-	0.0111	3.2814	3.491	3.2476	3.1956	3.2287	2.8723	3.4241	3.538	3.227	3.2604	3.5854	3.2217	3.027	3.512	3.6424	3.5307	3.3566	3.3815	3.758	3.4423	3.6048	3.9597	3.2181	3.5594	3.1862	3.8839	3.8556	3.4222	3.9046	3.5732	3.6878	3.6117	3.6104	3.5729	3.6817
pos_814	metab_808	metab_808	-	-	364.069	2.4219	pos	-	-	-	-	-	-	0.0077	4.5421	4.2781	4.5473	4.3558	4.4713	4.4679	4.5477	4.409	4.5662	4.5191	4.2944	4.5385	4.5445	4.1345	4.2297	4.305	4.4547	4.1596	4.3195	4.3968	4.3516	3.7144	4.5065	4.1934	4.3232	3.9687	4.1594	4.5177	4.1504	4.3717	4.2966	4.338	4.3733	4.3271	4.3327
pos_815	metab_809	metab_809	-	-	175.075	2.4219	pos	-	-	-	-	-	-	0.0106	3.6982	3.7912	3.7859	3.2613	3.4229	3.3453	3.674	3.9103	3.8024	3.6164	4.0743	3.5318	3.4711	4.0647	4.0682	3.9884	3.8236	4.5768	4.2083	4.1964	3.9583	4.8438	3.655	4.1904	3.2644	3.8941	3.802	3.65	3.6127	3.5622	3.6267	3.6443	3.9475	4.053	4.0489
pos_816	metab_810	metab_810	-	-	319.164	2.3606	pos	-	-	-	-	-	-	0.0049	3.9389	4.2542	3.3178	3.4415	3.2525	3.1897	3.5882	4.1204	3.7781	4.0396	3.8675	3.7259	3.383	4.7014	4.7249	4.6229	3.9518	4.0384	4.0947	4.0942	4.0388	4.8101	3.6152	4.105	4.3693	4.4584	4.617	4.0766	4.661	4.4047	4.5142	4.3918	4.418	4.365	4.3872
pos_817	metab_811	metab_811	-	-	513.135	2.4219	pos	-	-	-	-	-	-	0.0068	4.3417	4.4154	4.4206	3.3474	3.423	3.3602	3.9204	4.3643	4.48	4.3463	4.6502	3.7127	3.5754	4.4854	4.5154	4.7932	4.3747	4.2692	4.5596	4.5906	4.3944	3.6419	4.1431	4.4965	3.5301	4.5353	4.5997	4.2967	4.3912	4.2922	4.2979	4.2975	4.5768	4.4986	4.5497
pos_818	Lusitanicoside	metab_812	HMDB0034120	C10474	425.177	2.4219	pos	M+H-H2O, M+H	C21H30O10	-	52.2	-7.76521	-	0.0097	3.7912	4.3669	4.0634	2.991	3.3462	3.0038	4.1069	4.1819	3.9237	4.2146	4.6097	3.7103	3.784	4.4323	4.5765	4.6353	4.2447	4.0008	4.209	4.5461	4.5732	3.2853	4.1729	4.4727	4.0764	4.915	4.9673	4.5894	4.8459	4.5952	4.7191	4.6621	4.665	4.5618	4.5509
pos_819	metab_813	metab_813	-	-	355.14	2.3606	pos	-	-	-	-	-	-	0.0038	4.8267	4.2567	4.5536	2.6474	3.5996	2.6602	4.1443	4.6496	4.4512	4.9737	4.135	4.0361	4.5993	3.9796	4.5915	4.0875	4.5552	4.6218	4.3094	4.9719	4.7082	4.426	4.9544	4.6107	3.9126	4.1565	4.7531	4.4389	4.6409	4.4035	4.5096	4.5746	4.5921	4.6332	4.6334
pos_820	metab_814	metab_814	-	-	209.153	2.4433	pos	-	-	-	-	-	-	0.0052	3.9902	4.2902	4.0242	3.3084	3.9143	3.115	4.0768	4.2697	3.9788	4.1316	4.4302	3.9303	3.9916	4.7524	4.6986	4.6457	4.1669	4.4781	4.4436	4.4536	4.5567	4.6709	3.9997	4.5775	4.2907	4.9748	4.8028	4.4903	4.8427	4.6407	4.737	4.7017	4.5456	4.6013	4.6044
pos_821	metab_815	metab_815	-	-	214.107	2.3811	pos	-	-	-	-	-	-	0.0054	3.9976	4.1224	3.9	3.9957	4.0529	3.9749	3.9836	4.0004	3.9658	4.0011	3.9655	4.037	3.8893	4.1794	4.117	4.0675	4.0283	3.9422	4.1314	4.042	4.1081	4.1384	3.9499	4.1191	3.9414	4.1821	4.1576	4.0282	4.2492	4.0651	4.1075	4.1227	4.1275	4.0851	4.1448
pos_822	metab_816	metab_816	-	-	308.159	2.4219	pos	-	-	-	-	-	-	0.0052	4.3667	4.2603	3.9235	3.2641	3.7135	3.175	3.7909	4.2037	3.9737	4.1335	4.4035	3.5328	3.6344	4.5996	4.6053	4.608	4.2633	4.4171	4.9245	4.0173	3.8355	4.091	3.9739	4.5239	3.6702	4.3538	4.5751	4.1916	4.3596	4.125	4.1659	4.1649	4.4088	4.376	4.3808
pos_823	metab_817	metab_817	-	-	194.117	2.4011	pos	-	-	-	-	-	-	0.006	4.0557	3.8897	3.8999	3.7413	3.8525	3.9108	3.8884	3.9416	3.8293	4.0134	4.0664	3.9993	4.1163	4.2735	4.3238	4.2274	3.9239	3.9892	4.0067	3.8709	3.8451	4.0194	3.964	3.8986	3.7428	3.8491	3.8471	3.9049	4.0128	3.8745	3.8003	3.815	4.0437	3.9794	3.9994
pos_824	metab_818	metab_818	-	-	381.212	2.4219	pos	-	-	-	-	-	-	0.0087	4.4357	4.5528	3.9961	3.0375	2.9714	2.9087	4.0604	3.5967	3.9563	4.1465	4.1913	3.5505	3.4392	5.139	4.81	4.8655	3.9522	3.7724	4.3984	3.7974	3.6347	5.1155	3.06	3.9701	3.8302	4.5425	4.4553	4.1791	4.3457	4.2461	4.302	4.3244	4.36	4.3766	4.4532
pos_825	P-Acetaminobenzaldehyde	metab_819	-	-	164.07	2.4219	pos	M+H, 2M+H	C9H9NO2	77.9	-	-4.00604	-	0.0017	4.6945	4.5508	4.6838	4.6297	4.6421	4.6175	4.5324	4.5494	4.5089	4.5577	4.4866	4.5853	4.5647	4.748	4.6875	4.7335	5.3261	4.8732	4.5761	4.5733	4.5012	7.2945	4.877	4.7114	4.2712	4.4035	4.4251	4.34	4.301	4.3523	4.3564	4.3604	5.9852	5.9831	5.9792
pos_826	metab_820	metab_820	-	-	283.128	2.4219	pos	-	-	-	-	-	-	0.0133	3.4178	3.7355	3.3711	3.147	2.686	3.1033	3.5284	3.8217	3.4059	3.7204	4.0684	3.3816	3.2782	3.9316	3.9827	3.9075	3.7818	3.8424	4.156	3.7166	4.0535	3.8024	3.892	3.905	3.0137	3.9445	3.986	3.4207	3.6893	3.5518	3.5902	3.5815	3.8293	3.9432	3.8087
pos_827	metab_821	metab_821	-	-	207.101	2.3198	pos	-	-	-	-	-	-	0.003	4.3496	4.6723	4.2081	4.1046	4.1769	4.0207	4.2696	4.7028	4.1806	4.4143	4.5884	3.976	4.0572	4.5832	4.6141	4.5372	4.3366	4.6209	4.5474	4.4915	4.8002	4.5581	4.3372	4.7437	4.4585	5.2325	4.8202	4.8641	5.2026	4.9381	5.0125	4.9824	4.7585	4.7477	4.7202
pos_828	metab_822	metab_822	-	-	385.043	2.279	pos	-	-	-	-	-	-	0.003	4.1621	4.3487	4.5214	3.6124	3.8489	3.8067	4.6356	4.6249	4.4357	4.2697	4.8811	4.0925	4.3013	4.6267	4.5553	4.657	4.2243	4.5704	4.7045	4.3921	4.4921	3.6524	4.2731	4.5099	4.3659	4.2451	4.2853	4.1773	3.7699	4.1751	4.155	4.1303	4.4933	4.5041	4.5021
pos_829	metab_823	metab_823	-	-	147.043	2.2995	pos	-	-	-	-	-	-	0.0016	4.7318	4.9185	4.8514	4.0778	4.3072	3.8349	4.6644	4.9183	4.6422	4.7176	5.1794	4.3954	4.5809	5.0948	5.0881	5.063	4.6672	5.1236	5.1366	4.9545	5.0177	5.2941	4.5812	5.0705	5.1396	5.6069	5.5007	5.2952	5.6158	5.3874	5.4788	5.423	5.2021	5.215	5.2123
pos_830	metab_824	metab_824	-	-	256.19	2.279	pos	-	-	-	-	-	-	0.0101	3.826	3.9909	3.7295	2.875	3.2783	2.7737	3.6573	4.17	3.555	3.7431	4.253	2.9703	3.1946	4.2793	4.244	4.2571	3.9133	4.3345	4.2547	4.4919	4.364	4.4227	3.824	4.3544	2.9434	4.0536	4.1059	3.6954	3.901	3.4704	3.711	3.6772	4.0472	4.0659	4.1568
pos_831	(-)-11-hydroxy-9,10-dihydrojasmonic acid	metab_825	LMFA02020012	-	229.143	2.259	pos	M+H, M+ACN+H	C12H20O4	68.3	-	-3.88581	-	0.0029	4.5406	4.7117	4.2419	4.2127	4.108	3.8797	4.4548	4.6681	4.4107	4.49	4.7905	4.0041	4.1069	4.9673	4.9023	4.8905	4.5512	4.5378	4.7086	4.5823	4.8377	4.879	4.4932	4.8346	4.5258	5.2611	4.8481	4.9038	5.1448	4.9454	5.0193	4.9909	4.8431	4.8634	4.8392
pos_832	metab_826	metab_826	-	-	183.101	2.259	pos	-	-	-	-	-	-	0.0034	4.6178	4.8153	4.4876	4.5304	4.5195	4.4983	4.6377	4.7102	4.5557	4.6271	4.6925	4.5496	4.5224	4.8887	4.8651	4.8144	4.6491	4.5686	4.8524	4.6665	4.7308	4.8824	4.6181	4.7841	4.7833	5.1112	5.057	4.875	5.1722	4.9625	4.9953	4.9796	4.8629	4.857	4.8221
pos_833	metab_827	metab_827	-	-	227.102	1.2587	pos	-	-	-	-	-	-	0.0015	5.1804	5.5132	5.2499	4.55	5.0514	4.3802	5.1717	5.4301	5.2148	5.3159	5.426	4.9754	4.9861	5.7433	5.6771	5.6621	5.3117	5.5357	5.5475	5.6298	5.5313	5.7791	5.2786	5.5711	5.1633	5.4919	5.4012	5.2573	5.4901	5.2898	5.3712	5.3425	5.5025	5.5165	5.4929
pos_834	metab_828	metab_828	-	-	344.09	1.2587	pos	-	-	-	-	-	-	0.0039	3.0656	3.5914	2.8585	2.4837	3.196	2.4965	3.2938	3.196	3.0375	3.039	3.1594	2.5384	2.5655	5.0927	4.7209	5.1652	3.5351	3.5799	3.3282	3.7649	3.2841	5.3052	3.1072	3.6245	2.666	3.4696	3.1629	3.0174	3.2468	3.1517	2.9251	3.2195	4.7592	4.7494	4.7566
pos_835	metab_829	metab_829	-	-	231.137	2.2387	pos	-	-	-	-	-	-	0.0206	3.1541	3.3461	3.0065	2.7826	2.776	3.1729	3.1315	2.9377	2.81	3.2127	3.268	2.9065	2.9761	2.958	3.131	3.1101	3.092	2.7675	3.4333	3.2735	3.3957	3.6063	2.9645	3.2121	3.1633	3.9608	3.9004	3.4665	3.9456	3.7578	3.8622	3.753	3.3965	3.448	3.3611
pos_836	metab_830	metab_830	-	-	225.054	1.2587	pos	-	-	-	-	-	-	0.0067	3.8796	3.8467	4.2416	2.8789	3.2919	3.4494	4.214	4.2328	3.4724	4.1694	4.2207	3.7493	4.0748	4.3206	4.2833	4.3716	4.3621	4.206	4.4256	4.4619	3.8792	4.2394	4.222	4.2308	3.8493	3.7686	3.8662	3.9803	3.3692	3.7425	3.6423	3.6789	4.2832	4.2669	4.2073
pos_838	metab_832	metab_832	-	-	329.101	1.2587	pos	-	-	-	-	-	-	0.01	2.9547	3.7485	3.6157	1.9766	2.0515	1.9893	3.208	3.8257	3.3794	3.5819	3.6849	2.8606	2.6923	4.2543	4.1671	4.2864	3.9106	4.1477	4.4666	4.2981	4.1087	4.4778	3.641	4.2465	3.2131	3.6864	3.2308	2.2352	2.6863	2.2993	2.7812	3.037	3.9341	3.915	3.9876
pos_839	metab_833	metab_833	-	-	251.138	1.2587	pos	-	-	-	-	-	-	0.006	3.9839	4.2415	3.9584	2.8552	3.8041	2.4293	3.9903	4.255	3.97	4.1163	4.414	3.675	3.8729	4.6815	4.5753	4.5772	4.1798	4.452	4.5014	4.283	4.379	4.8244	4.0651	4.3907	3.8426	4.4963	4.4128	3.8447	4.4187	4.1005	4.2723	4.2119	4.3784	4.4503	4.4193
pos_840	metab_834	metab_834	-	-	205.154	1.2998	pos	-	-	-	-	-	-	0.006	3.7791	3.5989	3.866	3.4996	3.8761	3.481	3.6314	3.8793	3.8402	3.6746	3.8406	3.6305	3.9769	3.9234	3.8915	3.9331	3.7561	3.8106	3.8423	3.8611	3.7808	3.8378	3.6788	3.8151	3.765	3.9006	4.0223	3.6755	3.7876	3.8874	3.8829	3.9339	3.9518	3.8979	3.9235
pos_841	metab_835	metab_835	-	-	542.73	0.5584	pos	-	-	-	-	-	-	0.0033	5.7433	4.8524	5.9808	4.3153	4.1838	4.4834	3.1126	4.8578	4.9322	5.0886	4.0648	4.5969	6.0967	5.8179	4.9837	5.6247	4.6296	3.439	3.8308	3.7957	4.1319	4.846	4.6666	3.2617	6.1682	4.7692	5.4134	4.9683	5.9898	5.811	5.7675	5.6518	4.8553	4.8583	4.819
pos_842	metab_836	metab_836	-	-	356.096	1.2785	pos	-	-	-	-	-	-	0.0011	5.0994	5.068	5.2578	4.2755	4.8123	4.0468	5.2852	5.3222	5.0656	5.0751	5.3953	4.5313	4.9949	5.4012	5.4124	5.3639	5.1721	5.4867	5.6472	5.4227	5.5263	3.6239	5.2426	5.6055	4.8125	5.2471	5.2443	4.9802	5.1658	5.0062	5.0642	5.0488	5.2731	5.289	5.2788
pos_843	metab_837	metab_837	-	-	207.112	1.2998	pos	-	-	-	-	-	-	0.0045	4.2815	4.3427	4.2705	4.0539	4.2636	4.0912	4.3163	4.3274	4.215	4.2466	4.3645	4.1888	4.2713	4.5533	4.4948	4.546	4.2785	4.3306	4.3803	4.358	4.4775	4.6704	4.2385	4.5071	4.3779	4.7049	4.7013	4.3947	4.7128	4.5828	4.5903	4.5855	4.4794	4.5001	4.519
pos_844	metab_838	metab_838	-	-	393.167	1.2785	pos	-	-	-	-	-	-	0.0097	1.8222	3.752	1.7997	1.6708	1.745	1.6834	1.8194	3.712	3.236	3.635	4.0696	1.7246	3.2683	4.6567	4.4063	4.5208	3.9484	4.1153	4.5073	4.1446	4.1423	4.3999	3.5474	4.1404	2.5941	4.136	4.489	3.1094	4.0412	3.6099	3.6798	3.9128	4.1752	4.2729	4.2602
pos_845	metab_839	metab_839	-	-	276.87	0.5584	pos	-	-	-	-	-	-	0.0029	5.3094	5.1202	5.1071	5.0341	5.4348	5.0897	5.3107	5.2481	5.3611	5.3609	5.1148	5.2931	5.1001	4.4264	4.9993	5.0056	5.3331	4.9246	4.9503	5.1839	5.1158	4.7304	5.3592	4.9643	4.7716	4.9782	4.9833	5.401	4.6569	5.0917	4.9226	5.0535	5.2108	5.207	5.1729
pos_846	metab_840	metab_840	-	-	343.185	1.2785	pos	-	-	-	-	-	-	0.0057	3.3001	3.6575	3.3893	2.1135	2.1886	2.1263	2.3063	3.7481	2.2612	3.8696	3.6837	2.168	2.195	4.1366	4.1949	4.2316	3.3145	3.9262	4.0207	3.7702	3.8332	4.4942	3.5097	3.9132	3.1591	4.2878	4.1536	3.2279	4.2436	3.8908	3.8844	4.0065	4.0741	4.0481	4.0234
pos_847	metab_841	metab_841	-	-	336.154	1.2785	pos	-	-	-	-	-	-	0.0034	3.8101	4.3353	4.1025	2.8339	3.7847	2.8289	3.8765	4.3346	4.2802	4.1721	4.4308	3.7102	3.3748	4.2821	4.2057	4.2359	4.2738	4.5791	4.44	4.5188	4.4069	4.568	4.0395	4.5366	3.9205	4.3442	4.1512	4.0911	4.2856	4.2853	4.3502	4.1697	4.3014	4.3284	4.3416
pos_848	metab_842	metab_842	-	-	275.138	1.2785	pos	-	-	-	-	-	-	0.0071	2.8332	3.4367	2.2463	2.1159	2.5953	2.1287	3.5263	3.4968	3.4294	2.928	3.8403	3.1434	3.0012	4.4473	4.2805	4.2804	3.4421	3.3537	3.5701	3.5265	3.9708	3.9082	2.6558	3.8886	3.4728	3.8595	4.0685	4.3091	4.4267	4.0266	4.3042	4.2413	4.0636	4.0822	4.1172
pos_849	L-phenylalanyl-L-hydroxyproline	metab_843	HMDB0011176	-	279.133	1.2998	pos	M+H, M+Na	C14H18N2O4	-	66.4	-3.7932	-	0.0008	5.469	5.9896	5.589	5.0394	5.5089	5.0346	5.6218	5.9408	5.7976	5.8846	6.0558	5.536	5.2037	5.9728	6.0827	5.9599	5.8634	6.2551	6.1391	6.078	6.1531	6.0857	5.8458	6.2143	5.5985	5.848	5.7351	5.5795	5.7292	5.5611	5.6564	5.563	5.9165	5.9257	5.9134
pos_850	metab_844	metab_844	-	-	332.169	1.2998	pos	-	-	-	-	-	-	0.0055	4.2858	4.2653	4.2034	2.6729	3.6425	2.6255	4.2292	4.5192	4.0616	4.5514	4.5124	3.5291	4.0236	4.9422	4.9424	4.9743	4.3195	4.7074	4.6335	4.6005	4.4582	5.0263	4.3713	4.6547	4.2444	4.7943	4.7252	4.389	5.0515	4.6895	4.8087	4.77	4.6759	4.7037	4.7098
pos_851	metab_845	metab_845	-	-	165.102	1.2998	pos	-	-	-	-	-	-	0.0013	4.4726	4.3852	4.4182	4.4585	4.4775	4.4746	4.4378	4.3994	4.4129	4.426	4.3773	4.4785	4.4924	4.4964	4.4621	4.5146	4.3742	4.3448	4.3619	4.4181	4.384	4.5538	4.4223	4.4169	4.4341	4.4467	4.4518	4.4775	4.5805	4.4779	4.4795	4.4911	4.453	4.446	4.4472
pos_852	metab_846	metab_846	-	-	154.086	1.3208	pos	-	-	-	-	-	-	0.0026	4.4152	4.516	4.4269	4.1331	4.439	4.0643	4.5144	4.5556	4.2611	4.4659	4.7019	4.2359	4.266	4.7013	4.671	4.6434	4.5295	4.8168	4.7051	4.4444	4.6826	4.9643	4.4484	4.6994	4.328	4.8008	4.7048	4.4781	4.8716	4.5616	4.625	4.6112	4.6269	4.6597	4.6521
pos_853	metab_847	metab_847	-	-	113.107	1.2785	pos	-	-	-	-	-	-	0.0154	3.5359	3.2016	3.4134	3.6972	3.5457	3.6576	3.4806	3.2975	3.9269	3.4789	3.3439	3.5905	3.6613	3.0078	3.6211	3.1434	3.3141	3.2623	3.0478	3.1807	3.2264	3.2475	3.3413	3.1113	3.4021	2.8824	3.9067	3.4404	3.188	3.7349	3.6193	3.5479	3.3359	3.2746	3.2502
pos_854	metab_848	metab_848	-	-	212.842	0.5584	pos	-	-	-	-	-	-	0.0034	5.1938	5.6944	5.3748	3.5426	5.5061	3.1134	5.4254	5.8145	5.2681	5.5289	5.6815	4.0609	4.6877	5.4606	5.7509	5.5747	5.6458	5.5103	5.8784	5.8747	5.857	5.4617	5.4002	5.7648	4.825	5.2966	5.6359	5.7655	5.2363	5.9099	5.778	5.8968	5.7048	5.7141	5.7477
pos_855	metab_849	metab_849	-	-	136.075	1.3799	pos	-	-	-	-	-	-	0.0094	4.7228	4.772	4.6156	4.7926	4.632	4.6111	4.7556	4.6739	4.5997	4.635	4.8862	4.5938	4.6342	4.9033	4.8069	4.919	4.4352	4.6033	4.6208	4.6146	4.5591	4.9946	4.6872	4.6459	4.4262	4.6496	4.582	4.556	4.7671	4.6123	4.5931	4.6426	4.6511	4.7158	4.7583
pos_856	metab_850	metab_850	-	-	281.139	1.2998	pos	-	-	-	-	-	-	0.0066	3.2797	4.2351	3.4505	2.4532	3.4853	2.466	3.5498	4.018	3.7388	3.9269	4.0329	3.4946	3.2117	4.6067	4.3683	4.6212	3.9439	4.2342	4.433	4.0956	4.1385	4.0172	3.8559	4.2595	3.5973	4.5323	4.161	3.5728	3.7609	3.9955	3.857	3.8484	4.0515	4.1033	4.0685
pos_857	metab_851	metab_851	-	-	309.089	1.3208	pos	-	-	-	-	-	-	0.0126	3.0714	3.8672	1.9691	1.8394	1.914	1.8521	1.9889	3.6189	3.3664	2.7056	3.6157	2.3461	2.1252	3.5673	3.5019	3.5775	3.4136	4.099	3.5979	3.4491	3.8259	4.3361	3.2465	3.8791	2.6397	4.0615	3.4146	3.0509	3.7389	3.5699	3.681	3.6745	3.7889	3.7517	3.7406
pos_858	metab_852	metab_852	-	-	646.757	0.5391	pos	-	-	-	-	-	-	0.0031	4.8903	5.0178	4.2152	5.1609	5.4623	5.1602	5.2186	5.0672	5.3417	5.2752	4.9637	5.3809	3.7306	3.9289	4.7024	4.2154	5.3293	4.4893	4.7429	5.0475	4.9756	4.3279	5.3648	4.8053	3.756	4.846	4.436	5.2968	3.9852	4.3234	3.9341	4.3477	4.9739	5.0105	5.0023
pos_859	metab_853	metab_853	-	-	273.143	1.3208	pos	-	-	-	-	-	-	0.0012	4.5082	4.9395	4.8194	3.8636	4.5462	3.6306	4.7387	4.937	4.5164	4.7503	4.8742	4.3385	4.7426	5.1841	5.1346	5.1499	4.8233	4.9227	4.923	5.2941	5.2797	5.2027	4.6641	5.2735	4.6016	5.2417	5.0899	4.6923	5.1432	5.0632	5.0811	5.105	5.0907	5.0761	5.0766
pos_860	metab_854	metab_854	-	-	234.096	1.3208	pos	-	-	-	-	-	-	0.0038	4.2798	4.3843	4.3511	3.6302	3.8348	3.1955	4.3528	4.4121	4.0678	4.2561	4.459	3.8605	4.1128	4.6437	4.6208	4.605	4.4258	4.5211	4.4384	4.7005	4.5535	5.0702	4.1433	4.5914	4.3042	4.5716	4.5415	4.4284	4.5436	4.4419	4.444	4.4332	4.5569	4.5357	4.5098
pos_861	metab_855	metab_855	-	-	440.155	1.3208	pos	-	-	-	-	-	-	0.0026	4.1401	4.7459	4.3135	3.2114	4.0671	3.2243	4.3287	4.4704	3.7288	4.2539	4.8181	4.1109	3.6198	4.0992	4.619	4.3056	4.9619	4.8074	4.6051	4.8691	5.0129	3.7704	4.5249	4.757	4.2078	4.3748	4.58	4.5498	5.0085	4.8176	4.6703	4.8722	4.9936	4.9913	4.9901
pos_862	metab_856	metab_856	-	-	126.091	1.3406	pos	-	-	-	-	-	-	0.0028	4.024	4.0853	4.155	3.8177	3.9605	3.8787	4.0367	4.1639	3.9367	4.0557	4.1467	3.9572	4.0198	4.2816	4.2796	4.2944	4.0236	4.0842	4.0501	4.2618	4.1311	4.3671	3.9848	4.2036	4.0344	4.2731	4.215	4.0575	4.3543	4.1022	4.1459	4.148	4.2064	4.1754	4.1901
pos_863	metab_857	metab_857	-	-	134.071	1.3208	pos	-	-	-	-	-	-	0.0102	3.2427	3.0998	3.1976	3.3855	3.2819	3.428	3.223	3.1819	3.3727	3.2565	3.2013	3.3615	3.399	3.1125	3.159	3.1958	3.096	2.9407	3.0721	3.069	2.9315	2.5679	3.1384	3.0838	3.3744	3.4946	3.4309	3.3718	3.6262	3.4694	3.4822	3.3844	3.2092	3.2658	3.2069
pos_864	metab_858	metab_858	-	-	173.08	1.3208	pos	-	-	-	-	-	-	0.0042	3.3848	3.7235	3.429	3.212	3.3282	3.324	3.3879	3.4627	3.3162	3.4019	3.7972	3.3871	3.375	3.5841	3.6341	3.543	3.88	3.805	3.6124	3.9025	3.9279	3.5537	3.4432	3.7468	3.5743	3.6828	3.7451	3.7471	3.9912	3.9197	3.7733	3.9402	3.9932	3.9834	4.027
pos_865	metab_859	metab_859	-	-	368.096	1.3208	pos	-	-	-	-	-	-	0.0019	4.5516	5.1094	4.6402	4.1979	4.3019	3.8895	4.8518	4.9513	4.6804	4.7829	5.1861	4.4256	4.4851	4.8769	4.9794	4.8517	4.7588	5.0966	5.0094	5.0704	5.1081	4.7309	4.8264	5.1667	4.3796	4.9113	4.6795	4.6426	4.8126	4.6094	4.6658	4.6677	4.8821	4.857	4.8639
pos_866	metab_860	metab_860	-	-	282.133	1.3406	pos	-	-	-	-	-	-	0.0071	3.0745	4.022	3.0789	2.1767	3.2583	2.7855	3.3087	3.8753	3.6509	3.6043	4.0504	3.1878	3.2596	4.1016	4.038	4.086	3.4871	3.9501	4.0421	3.3804	3.9278	4.2214	3.2789	3.882	3.7176	4.4497	4.2443	4.0771	4.3589	4.167	4.2542	4.2177	3.9836	4.0226	4.0092
pos_867	metab_861	metab_861	-	-	279.082	1.3208	pos	-	-	-	-	-	-	0.0084	3.2093	3.2279	2.9334	2.8544	3.0916	2.9348	3.2453	3.1377	3.267	3.2885	3.8476	3.6422	3.6493	4.6851	4.2245	4.6419	3.2363	2.7009	3.3661	2.4469	2.9105	1.3188	3.1542	3.1147	2.927	3.9487	3.8297	2.9995	3.7667	3.3641	3.37	3.5423	3.9993	3.92	3.9169
pos_868	metab_862	metab_862	-	-	227.138	1.3406	pos	-	-	-	-	-	-	0.0047	4.0605	4.2117	4.2196	3.5196	4.0603	3.5786	4.1115	4.3988	3.9995	4.2905	4.4884	4.071	4.1206	4.9361	4.8426	4.8313	4.2405	4.5014	4.3911	4.3986	4.439	4.8893	4.1886	4.491	3.9435	4.6374	4.5628	4.1969	4.6028	4.305	4.4385	4.4016	4.5613	4.6022	4.5829
pos_869	metab_863	metab_863	-	-	179.07	1.3406	pos	-	-	-	-	-	-	0.005	3.7377	3.9696	3.656	3.351	3.5242	3.1863	3.7118	3.9228	3.618	3.606	4.0152	3.456	3.5648	4.0149	3.9894	4.0124	3.6783	3.8749	4.011	4.0376	3.9637	4.1811	3.6771	4.0666	3.7581	4.4959	4.3198	3.9876	4.5074	4.1962	4.2744	4.2759	4.0835	4.1055	4.0735
pos_870	metab_864	metab_864	-	-	287.195	1.3406	pos	-	-	-	-	-	-	0.0079	3.7991	4.1555	4.3417	2.6868	2.7467	3.244	4.0056	4.3372	3.758	3.4406	4.2241	3.6045	3.9587	4.1715	3.9714	4.0816	3.9832	4.546	4.6836	4.4673	4.476	4.0562	3.7816	4.572	3.242	4.1827	3.9504	3.7695	3.0827	3.7152	3.7137	3.776	4.185	4.1113	4.1868
pos_871	metab_865	metab_865	-	-	208.132	1.3595	pos	-	-	-	-	-	-	0.0018	4.1872	4.3335	4.1231	3.9024	4.1129	3.8198	4.2156	4.2978	4.1615	4.2733	4.6468	4.2875	4.4178	4.8567	4.7409	4.8158	4.1894	4.332	4.3973	4.2775	4.332	4.499	4.116	4.3714	4.2768	4.6904	4.6196	4.3183	4.6832	4.434	4.534	4.5375	4.5381	4.548	4.5254
pos_872	metab_866	metab_866	-	-	401.19	1.3406	pos	-	-	-	-	-	-	0.0061	3.6357	4.5853	3.6878	3.1892	3.1693	3.1066	4.3754	4.3802	3.7518	3.6482	4.0762	3.4297	3.2483	4.2828	4.2407	4.2759	3.6853	4.3803	3.9836	4.0489	4.1282	3.9978	3.6469	4.2488	3.8025	4.4226	4.0159	4.4036	4.4954	4.3708	4.3663	4.4123	4.18	4.2464	4.2382
pos_873	metab_867	metab_867	-	-	304.165	1.3406	pos	-	-	-	-	-	-	0.0083	3.1044	3.6505	3.28	2.94	3.1024	2.2951	3.3309	3.5759	3.4712	3.4292	3.6887	3.3668	3.3347	4.2588	4.2669	4.1566	3.368	3.388	3.7405	3.611	3.5333	4.1703	3.206	3.82	3.4789	4.1211	3.8589	3.1307	3.6116	3.6977	3.9107	3.8448	3.8416	3.9188	3.9135
pos_874	metab_868	metab_868	-	-	356.133	1.3406	pos	-	-	-	-	-	-	0.0041	4.1115	5.0207	4.0077	3.8428	3.8326	3.2277	4.6878	4.7425	4.0413	4.0156	4.6293	3.8438	3.6899	4.8437	4.7189	4.767	3.9859	4.7775	4.4576	4.2779	4.5385	4.1538	3.9549	4.5596	4.189	4.777	4.5058	4.4155	5.0614	4.6913	4.7809	4.7718	4.6334	4.5951	4.6193
pos_875	metab_869	metab_869	-	-	190.06	1.3406	pos	-	-	-	-	-	-	0.0041	3.8732	3.8676	3.5907	2.9747	3.8631	2.8004	3.8636	3.8868	3.8062	3.8066	4.1089	3.1894	3.2618	4.8653	4.6347	4.7365	3.8876	3.3329	4.0045	3.558	3.7474	5.4084	3.8531	3.8357	3.5465	4.0647	3.8974	3.4774	4.2159	3.8631	3.9861	3.9538	4.503	4.4696	4.4896
pos_876	metab_870	metab_870	-	-	275.033	1.3595	pos	-	-	-	-	-	-	0.0027	4.6196	4.4134	4.4769	4.1182	4.4497	4.0891	4.4999	4.5211	4.5377	4.5077	4.2734	4.3665	4.2925	3.9745	4.0505	4.1195	4.5523	4.2267	4.4158	4.3888	4.3872	4.1197	4.6516	4.3837	4.3659	4.2263	4.3484	4.4956	4.5225	4.5717	4.4867	4.5392	4.3914	4.3977	4.3667
pos_877	metab_871	metab_871	-	-	242.084	1.3595	pos	-	-	-	-	-	-	0.0087	4.1234	3.94	4.0473	3.916	4.4106	3.8496	3.8966	4.0324	3.9332	4.2168	4.2531	3.9367	4.111	4.1529	4.2249	4.1904	4.1216	4.1268	4.0573	4.3691	3.9705	4.424	4.0311	4.1245	3.7211	3.9223	4.0147	3.7612	3.9657	3.8406	3.7965	3.8752	4.1236	4.0574	4.0653
pos_878	metab_872	metab_872	-	-	171.112	1.3595	pos	-	-	-	-	-	-	0.0061	4.0356	4.0045	3.9522	3.9521	3.8847	3.9089	3.8792	3.738	3.9084	3.9161	3.8396	3.8832	3.8803	3.7183	3.9084	3.8112	3.8716	3.678	3.7396	3.8858	3.84	3.7794	3.8685	3.8917	3.8776	3.6535	3.6875	3.8492	3.8334	3.7635	3.7657	3.835	3.8561	3.8666	3.8566
pos_879	metab_873	metab_873	-	-	182.081	1.3595	pos	-	-	-	-	-	-	0.0015	4.3736	4.5989	4.3006	4.0032	4.2314	3.9485	4.3785	4.5081	4.2879	4.3788	4.4512	4.1928	4.2285	4.8043	4.8053	4.7742	4.3146	4.5211	4.7073	4.4959	4.6637	4.7223	4.3541	4.6976	4.3882	4.763	4.5977	4.4217	4.6841	4.5486	4.5353	4.5285	4.6181	4.6078	4.6194
pos_880	metab_874	metab_874	-	-	322.131	1.3799	pos	-	-	-	-	-	-	0.0104	3.9094	4.153	3.6705	2.54	3.7218	2.7896	3.7641	4.1751	3.8946	3.8978	4.3574	3.5189	3.3762	4.3517	4.3278	4.2773	4.0228	4.2723	4.2393	4.3493	4.2756	4.3361	3.8422	4.3776	3.9175	4.5126	4.4113	3.964	4.573	4.2846	4.3654	4.2741	4.1963	4.2574	4.3069
pos_881	metab_875	metab_875	-	-	443.075	1.3799	pos	-	-	-	-	-	-	0.0089	4.2107	4.5086	4.0894	3.8147	3.7513	2.865	4.478	4.5094	4.0139	4.1275	4.6374	3.5668	3.6971	4.5935	4.5942	4.5469	4.2016	4.2504	4.3948	4.3916	4.2717	4.5534	4.1745	4.3876	3.9099	4.3003	4.3588	4.1891	4.5448	4.3099	4.3762	4.3002	4.4323	4.4158	4.4679
pos_882	metab_876	metab_876	-	-	144.08	1.3595	pos	-	-	-	-	-	-	0.0031	4.4461	4.3832	4.4102	4.5296	4.4656	4.5319	4.4172	4.396	4.4423	4.4282	4.3886	4.5145	4.5479	4.3541	4.335	4.4322	4.3942	4.3527	4.366	4.3966	4.3738	4.3049	4.4005	4.3882	4.4435	4.5647	4.5173	4.491	4.5785	4.5449	4.5149	4.5344	4.4571	4.4371	4.4383
pos_883	metab_877	metab_877	-	-	303.19	1.4204	pos	-	-	-	-	-	-	0.0091	4.5966	4.7764	4.4228	3.7395	4.3646	3.6327	4.6368	4.8071	4.6111	4.647	4.7723	4.1166	4.3271	5.2543	5.1889	5.1734	4.813	5.0696	5.3061	5.0316	4.8648	5.2888	4.7002	5.0992	4.7934	4.9839	4.9944	4.5691	4.8963	4.7705	4.794	4.8022	4.9023	5.0029	5.0103
pos_884	metab_878	metab_878	-	-	222.112	1.3799	pos	-	-	-	-	-	-	0.0051	4.1663	4.1177	4.1226	3.7605	3.7768	3.4326	3.7182	4.2838	3.8159	3.9179	3.8563	3.7332	3.8366	4.486	4.1393	4.5527	4.1066	3.934	4.5612	4.0113	3.7151	4.0036	4.1835	4.0311	3.8066	4.5118	4.1503	3.8846	4.1979	4.1588	4.055	4.1547	4.1478	4.1128	4.1151
pos_885	metab_879	metab_879	-	-	129.054	1.3595	pos	-	-	-	-	-	-	0.0007	4.4606	5.3198	4.3013	4.3421	3.7275	3.725	4.1173	4.9234	5.1476	5.0226	4.1016	4.7878	4.8897	5.5153	5.4361	5.4729	4.9172	4.2988	5.4396	4.9204	5.0046	4.7251	4.9945	5.149	4.8134	5.5453	5.4081	4.7042	4.6673	5.232	5.2937	5.2971	5.2407	5.2498	5.2446
pos_886	metab_880	metab_880	-	-	333.201	1.3799	pos	-	-	-	-	-	-	0.0153	2.5246	2.7339	3.306	2.371	2.9456	2.3838	3.3719	3.4706	3.2384	3.5568	3.5031	2.4257	2.4528	3.7882	3.5378	3.6082	3.4939	3.8431	3.9138	3.9508	4.1865	4.1754	3.0558	4.1348	3.3777	4.394	3.9125	3.6791	4.4347	4.0556	4.1392	4.1217	3.9641	3.816	3.9543
pos_887	metab_881	metab_881	-	-	232.117	1.3595	pos	-	-	-	-	-	-	0.0027	4.4933	4.753	4.5521	3.9361	4.4172	3.6383	4.7329	4.7379	4.5665	4.6577	5.1019	4.3118	4.6534	5.0818	5.0134	5.0356	4.5817	4.6026	4.8189	4.8326	4.8169	4.862	4.5015	4.833	4.504	5.0467	4.8604	4.7723	5.0632	4.8662	4.9246	4.9112	4.8962	4.8802	4.8629
pos_888	metab_882	metab_882	-	-	209.091	1.3595	pos	-	-	-	-	-	-	0.0039	4.5598	4.8936	4.4812	4.0002	4.0633	3.903	4.6032	4.8474	4.4582	4.6121	4.9657	4.2025	4.2747	4.8885	4.9256	4.8265	4.6941	4.6845	4.8954	4.8525	4.8698	4.9983	4.6585	4.9456	4.381	4.9182	4.827	4.5373	4.9145	4.6795	4.7201	4.7258	4.8283	4.8185	4.7941
pos_889	metab_883	metab_883	-	-	237.122	1.3595	pos	-	-	-	-	-	-	0.0019	4.866	5.1354	4.6893	4.3131	4.6983	4.1696	4.8743	5.015	4.7037	4.6743	5.1278	4.4918	4.6268	5.1818	5.092	5.0965	4.8397	4.7637	5.1277	4.9052	4.9742	5.2731	4.7642	5.0489	4.7046	5.3705	5.2519	4.8871	5.4069	5.0587	5.1818	5.1518	5.0858	5.0651	5.0602
pos_890	metab_884	metab_884	-	-	219.112	1.3799	pos	-	-	-	-	-	-	0.0028	4.3608	4.8324	4.3363	3.606	4.133	3.3942	4.6274	4.5253	4.1547	4.4416	5.0583	4.0767	3.9893	4.8032	5.019	5.0329	4.5746	4.8351	4.8239	5.1665	5.1554	5.6822	4.3033	5.0503	4.2606	4.7986	4.7283	4.4818	5.2206	4.6751	4.7627	4.8073	5.0218	5.0254	5.0551
pos_891	metab_885	metab_885	-	-	121.028	1.3595	pos	-	-	-	-	-	-	0.0019	5.6902	5.8559	5.5716	5.1184	5.501	5.0538	5.6749	5.8345	5.6534	5.6387	5.83	5.3514	5.315	5.7505	5.7981	5.7462	5.7052	5.6637	5.9283	5.6819	5.8373	5.8561	5.7636	5.8818	5.5474	5.9811	5.8765	5.6833	6.0454	5.8273	5.8911	5.887	5.795	5.8145	5.7962
pos_892	metab_886	metab_886	-	-	217.064	1.3208	pos	-	-	-	-	-	-	0.0021	3.4058	4.1644	3.2951	2.6967	3.4856	2.7095	3.4027	4.1774	4.0006	3.9126	4.2321	3.5664	3.7386	4.3432	4.2929	4.3252	4.0728	4.1989	4.4682	4.2579	4.3242	4.4654	4.0795	4.3921	3.6254	4.4059	4.1333	3.8646	4.2796	3.9825	4.079	4.0901	4.2432	4.2182	4.2344
pos_893	metab_887	metab_887	-	-	626.313	1.4002	pos	-	-	-	-	-	-	0.0039	4.6148	5.1338	4.96	4.3015	4.8631	4.0825	4.8915	5.2314	5.151	5.1271	5.5559	4.8006	4.6132	5.276	5.326	5.2812	5.0317	5.2638	5.4672	5.4713	5.0739	5.4131	5.1759	5.2978	4.7507	4.7534	4.9775	4.8168	4.9289	4.6759	4.7179	4.6544	5.168	5.1435	5.1663
pos_894	5-Hydroxyindoleacetylglycine	metab_888	HMDB0004185	C05832	249.086	1.4002	pos	M+H-H2O, M+H	C12H12N2O4	54.8	-	-3.78589	-	0.0012	4.4588	4.7269	4.4216	3.7344	4.1445	3.7237	4.659	4.7525	4.5084	4.6955	5.0263	4.3101	4.3297	4.9942	4.9588	4.9317	4.7121	4.6686	4.9579	4.9214	4.8578	5.0339	4.6581	4.9212	4.6665	5.072	5.0015	4.6714	5.1368	4.8594	4.9395	4.9088	4.9154	4.9114	4.9224
pos_895	metab_889	metab_889	-	-	178.089	1.3208	pos	-	-	-	-	-	-	0.0044	3.8988	4.1999	4.0024	3.3135	4.2753	3.4027	4.0759	4.1651	3.9501	4.3165	4.4125	4.0319	3.9585	4.4964	4.5286	4.4916	4.0081	4.4269	4.2116	4.5225	4.339	4.5496	3.9701	4.3958	3.916	4.4098	4.3233	4.0286	4.5205	4.2693	4.3461	4.3133	4.3566	4.3608	4.3485
pos_896	metab_890	metab_890	-	-	170.081	1.3208	pos	-	-	-	-	-	-	0.0022	4.7572	4.8457	4.6106	4.3277	4.5727	4.2829	4.6734	4.7721	4.6404	4.6951	4.8518	4.4596	4.485	4.8132	4.8515	4.8281	4.7069	4.6138	4.9214	4.6969	4.7539	4.9123	4.6813	4.8329	4.7551	5.2238	5.1201	4.9142	5.2547	5.0084	5.0621	5.058	4.9045	4.9088	4.8805
pos_897	metab_891	metab_891	-	-	255.133	1.3595	pos	-	-	-	-	-	-	0.0017	5.23	5.4932	5.2411	4.8807	5.227	4.6962	5.3353	5.4245	5.1013	5.213	5.4261	4.9417	5.0267	5.5186	5.4913	5.4904	5.3185	5.4487	5.5031	5.489	5.4643	5.6181	5.2372	5.5126	5.1471	5.6308	5.6473	5.3494	5.8352	5.5049	5.6034	5.5982	5.4982	5.4786	5.5037
pos_898	metab_892	metab_892	-	-	232.154	1.3208	pos	-	-	-	-	-	-	0.0028	5.1734	5.3301	4.9574	4.5701	4.9739	4.5537	5.0789	5.3633	5.0939	5.0669	5.5639	4.9716	4.8111	5.3933	5.41	5.4109	5.238	5.4041	5.325	5.2368	4.9689	5.524	4.8928	5.2527	5.4683	5.1438	5.3745	5.1932	5.4349	5.2574	5.3526	5.1605	5.2628	5.2989	5.2744
pos_899	metab_893	metab_893	-	-	136.039	1.4204	pos	-	-	-	-	-	-	0.003	4.8179	4.02	4.7844	3.4902	4.6501	4.266	4.7134	5.0469	4.2805	5.2417	4.969	3.9368	4.098	4.2096	4.2502	4.1923	4.8251	4.7321	4.2076	5.2541	4.9726	4.0393	4.7923	5.1612	4.4303	4.3351	4.3088	4.8718	5.454	4.344	4.5292	4.4187	4.497	4.4618	4.4797
pos_900	metab_894	metab_894	-	-	209.12	1.4204	pos	-	-	-	-	-	-	0.0049	4.0643	4.5705	4.4386	3.9801	4.0656	3.5438	4.3145	4.5157	4.3354	4.4857	4.6303	4.2677	4.4747	4.7633	4.7723	4.7437	4.5291	4.3391	4.5001	4.7106	4.798	4.8169	4.3452	4.7807	4.4409	4.8216	4.4025	4.5069	4.5078	4.5084	4.5463	4.4815	4.6108	4.6535	4.6442
pos_901	metab_895	metab_895	-	-	109.101	1.4204	pos	-	-	-	-	-	-	0.0077	3.5186	3.6937	3.6235	3.4624	3.5165	3.4706	3.5668	3.6772	3.5688	3.6593	3.767	3.6029	3.7046	3.9208	3.8605	3.9006	3.67	3.6303	3.678	3.8121	3.8708	3.7813	3.5751	3.8186	3.738	4.0714	3.8574	3.8057	3.972	3.8701	3.895	3.873	3.8204	3.8295	3.7553
pos_902	metab_896	metab_896	-	-	225.148	1.4204	pos	-	-	-	-	-	-	0.0093	3.5054	3.816	3.6521	3.0405	3.9306	2.8913	3.6591	3.7116	3.5271	3.707	4.3553	3.3369	3.5371	4.0591	4.1002	4.0626	3.8543	4.1091	3.846	3.9781	4.3531	4.1998	3.4543	4.0978	3.7039	4.2132	4.0176	4.0292	4.3165	4.0029	3.9401	4.1496	4.1002	4.055	4.1614
pos_903	metab_897	metab_897	-	-	224.127	1.4411	pos	-	-	-	-	-	-	0.0024	4.5639	4.9954	4.4021	3.8814	4.5563	3.9524	4.3906	4.734	4.3711	4.4121	4.8651	4.2305	4.2667	5.0813	5.0345	4.979	4.7524	4.7455	4.8567	4.7426	4.8508	5.6032	4.4154	4.8647	4.3788	5.0424	4.9645	4.55	5.0699	4.7617	4.7736	4.8362	4.9359	4.9259	4.9402
pos_904	metab_898	metab_898	-	-	332.206	1.4204	pos	-	-	-	-	-	-	0.0147	3.5288	3.7034	3.4133	3.405	3.4972	3.1572	3.453	3.5325	3.62	3.5803	3.7903	3.4292	3.534	4.118	3.9202	4.0542	3.4188	3.8558	3.6577	3.6294	3.9161	4.1195	3.4928	3.7508	3.6247	4.1285	3.8957	3.661	4.3019	3.8772	3.9765	3.9667	3.9069	3.9108	3.7882
pos_905	metab_899	metab_899	-	-	401.179	1.4411	pos	-	-	-	-	-	-	0.0023	3.8077	4.1989	3.979	3.1743	3.9172	2.8617	3.9501	4.1876	3.9274	4.0669	4.3376	3.8843	3.8701	4.7589	4.5537	4.6897	4.0536	4.3519	4.3044	4.4178	4.5049	4.3842	3.8296	4.5198	3.9579	4.5613	4.3007	3.9867	4.418	4.1962	4.2685	4.2535	4.4065	4.3805	4.3901
pos_906	metab_900	metab_900	-	-	346.185	1.4411	pos	-	-	-	-	-	-	0.0159	3.9797	3.8558	3.7148	2.9203	3.8029	3.3151	4.1608	4.1917	3.8006	3.7863	4.1535	3.3098	3.5576	4.5125	4.4168	4.4501	3.8198	4.3936	4.2064	4.0333	4.2683	4.6204	3.6163	4.2997	3.8921	4.5211	4.2259	3.8053	4.558	4.2455	4.4023	4.382	4.4099	4.2858	4.3751
pos_907	metab_901	metab_901	-	-	326.159	1.4411	pos	-	-	-	-	-	-	0.0162	3.6933	3.7224	3.5689	3.8042	3.2899	3.1316	3.4302	3.6862	3.9716	3.8523	3.8621	3.2368	3.245	3.7243	3.7239	3.8964	3.6012	3.824	3.6287	3.7762	3.9562	3.7358	3.283	3.7816	4.0257	4.2821	4.1519	3.9177	4.5715	4.2289	4.449	4.3993	4.0435	3.8926	4.0372
pos_908	metab_902	metab_902	-	-	271.164	1.4411	pos	-	-	-	-	-	-	0.0018	3.8931	4.1381	3.9788	2.6393	3.7349	2.9737	3.993	4.2397	4.0403	3.9763	4.1057	3.7964	3.8794	4.347	4.3112	4.3889	3.7885	3.9261	4.4579	4.2343	4.3958	3.8077	3.7128	4.3841	4.1486	4.613	4.8428	4.0898	4.6018	4.4376	4.5602	4.5102	4.3463	4.3243	4.3382
pos_909	metab_903	metab_903	-	-	532.128	1.4204	pos	-	-	-	-	-	-	0.0147	3.6103	3.6448	3.7737	2.5409	2.6163	2.5537	3.4537	3.8559	3.5107	3.1707	4.0151	2.5957	2.6228	4.0782	3.3282	4.0275	3.8183	4.2086	4.4287	3.7595	4.273	3.1288	3.2389	4.3228	2.8855	4.0466	3.7957	3.2771	3.6265	3.5749	3.5404	3.6834	4.0184	3.9381	3.8955
pos_910	metab_904	metab_904	-	-	161.092	1.4411	pos	-	-	-	-	-	-	0.0075	3.5027	3.6407	3.5645	3.4134	3.4293	3.4262	3.4884	3.5069	3.4455	3.6558	3.6989	3.5066	3.4648	3.7536	3.7184	3.6527	3.6988	3.6244	3.7373	3.801	3.6053	3.7609	3.6238	3.6637	3.4396	3.803	3.6963	3.6555	3.8642	3.6922	3.6756	3.7105	3.7118	3.6881	3.6633
pos_911	metab_905	metab_905	-	-	925.444	1.4411	pos	-	-	-	-	-	-	0.0109	3.8399	4.2374	3.8725	3.4575	4.0189	3.2032	4.1205	4.4309	4.2685	4.3125	4.4744	3.7297	3.2724	4.1593	4.4394	4.2973	4.2103	4.7243	4.5021	4.4	4.7592	4.7874	4.3202	4.7855	3.9148	3.8879	4.1106	3.8792	3.7971	3.5262	3.7917	3.8048	4.4087	4.2898	4.331
pos_912	metab_906	metab_906	-	-	951.475	1.4411	pos	-	-	-	-	-	-	0.0212	4.2387	5.6025	4.592	3.0317	3.218	2.549	2.6871	5.069	3.9198	4.9762	3.7128	5.2476	3.9711	3.3723	4.8531	4.4043	2.7246	4.7965	4.7481	2.8197	2.8202	2.8301	4.8869	3.968	2.7185	2.9384	2.918	3.5583	2.9475	2.8606	2.8964	2.8844	4.4678	4.4615	4.3633
pos_914	metab_908	metab_908	-	-	348.068	1.4616	pos	-	-	-	-	-	-	0.0043	3.8157	5.077	4.5924	4.3009	2.6927	4.1549	4.2524	3.7711	4.8321	4.858	1.6401	4.6639	4.7456	5.0797	5.0238	5.0782	4.4934	1.5667	5.0134	4.7391	4.0517	4.5684	4.8013	4.3509	5.1634	5.0673	5.0081	4.8518	1.7505	5.0574	5.0296	5.0697	4.7773	4.8074	4.8358
pos_915	metab_909	metab_909	-	-	200.091	1.4616	pos	-	-	-	-	-	-	0.0016	4.0774	4.3289	4.1898	3.4632	3.9228	3.5508	4.1933	4.3164	4.1251	4.2323	4.3561	3.8908	4.109	4.6962	4.6235	4.6728	4.202	4.4496	4.6639	4.4422	4.3803	4.653	4.1025	4.5044	4.1051	4.5468	4.381	4.215	4.4236	4.2607	4.3434	4.3547	4.4538	4.4504	4.4371
pos_916	metab_910	metab_910	-	-	330.081	1.4411	pos	-	-	-	-	-	-	0.002	4.2155	4.3933	4.2797	3.8508	4.087	3.4555	4.2454	4.3689	4.2515	4.4559	4.5833	3.7682	4.0839	4.8613	4.8151	4.8041	4.4963	4.629	4.8251	4.7119	4.5769	4.4561	4.3374	4.7301	4.5901	5.0696	5.1012	4.607	5.1021	4.8226	4.9055	4.9171	4.7515	4.775	4.7679
pos_917	metab_911	metab_911	-	-	283.164	1.4204	pos	-	-	-	-	-	-	0.0108	4.0025	4.1476	3.784	3.9469	3.9385	3.9301	4.0677	4.1688	4.0892	4.1674	4.3944	4.0331	4.1199	4.3889	4.3783	4.3251	4.0935	3.8579	4.3586	3.7926	4.1619	4.2609	4.2701	4.0937	3.9342	4.5318	4.4456	4.1378	4.4327	4.1612	4.1971	4.3021	4.3129	4.2643	4.2442
pos_918	metab_912	metab_912	-	-	887.446	1.4204	pos	-	-	-	-	-	-	0.002	4.3825	5.697	4.5304	2.6037	2.6791	2.6165	2.7547	5.0673	3.7581	4.8847	2.9025	5.16	3.1982	3.5934	4.8323	4.5533	2.7922	4.7458	4.914	2.8873	2.8878	2.8977	4.8276	4.2313	2.7861	3.006	2.9856	3.165	3.0151	2.9282	2.9641	2.9521	4.4948	4.5112	4.495
pos_920	metab_914	metab_914	-	-	413.14	1.4616	pos	-	-	-	-	-	-	0.0036	5.2335	5.6595	5.4779	4.592	4.968	4.4131	5.4226	5.5855	5.4325	5.5932	5.6287	4.9711	5.1098	5.8075	5.8268	5.7823	5.5642	5.7182	5.7587	5.9165	5.908	5.8844	5.5601	5.8944	5.3257	5.7826	5.7447	5.3983	5.6984	5.5877	5.7019	5.6553	5.7401	5.72	5.7411
pos_921	metab_915	metab_915	-	-	147.063	1.4616	pos	-	-	-	-	-	-	0.0042	4.8222	5.2811	5.1721	4.4654	4.5072	4.2887	5.0748	5.1089	5.0904	5.1414	4.6863	4.8173	5.027	5.5216	5.5141	5.4915	4.9711	4.9439	5.2924	5.5489	5.3367	4.9777	5.0737	5.4103	4.7722	5.2395	5.2123	4.9175	5.0311	4.9984	5.1475	5.1288	5.2554	5.2793	5.2843
pos_922	metab_916	metab_916	-	-	385.159	1.4616	pos	-	-	-	-	-	-	0.0046	4.635	4.7527	4.9104	4.2013	4.3046	3.9512	4.9437	4.6099	4.8862	4.9156	4.4996	4.8365	5.1271	5.3524	5.1468	5.2497	4.6918	4.4429	4.6318	5.0313	4.8171	4.0661	4.7976	4.7922	4.4658	4.568	4.5595	4.5923	4.2803	4.543	4.5911	4.6419	4.8537	4.8708	4.91
pos_923	metab_917	metab_917	-	-	314.159	1.4616	pos	-	-	-	-	-	-	0.0044	4.1724	4.3201	4.0086	3.235	3.7865	2.8439	4.0393	4.2954	3.972	4.1188	4.2479	3.4711	3.8115	4.6422	4.5817	4.5669	4.0143	4.1249	4.4543	4.2364	4.3091	4.7252	4.0958	4.3926	4.0323	4.9269	4.7704	4.3834	4.9275	4.6912	4.7638	4.8136	4.4954	4.544	4.5323
pos_924	metab_918	metab_918	-	-	228.122	1.4616	pos	-	-	-	-	-	-	0.0038	4.8005	4.8807	4.7483	4.1819	4.6163	4.1816	4.981	5.0454	4.7192	5.0901	5.0524	4.5194	4.6888	4.9785	5.0711	4.9687	4.8447	5.2932	5.0363	5.1047	5.2276	4.9754	4.8447	5.3428	4.7412	5.0489	5.0584	5.0203	5.1953	4.9278	5.0158	5.0027	4.9873	4.9944	5.0342
pos_925	metab_919	metab_919	-	-	158.096	1.4616	pos	-	-	-	-	-	-	0.0061	4.2793	4.0958	4.2465	4.4224	4.2856	4.4571	4.2728	4.1265	4.2738	4.2725	4.138	4.349	4.4306	4.0859	4.0105	4.2123	4.1828	4.0728	4.0173	4.1806	4.1145	4.0334	4.2514	4.0238	4.201	4.2371	4.1229	4.2917	4.2864	4.2899	4.1646	4.2475	4.1335	4.0905	4.1295
pos_926	metab_920	metab_920	-	-	170.096	1.4616	pos	-	-	-	-	-	-	0.0206	2.9212	3.1171	2.765	2.5062	2.6044	2.5815	2.9407	3.0032	2.8245	2.6308	2.8173	2.8434	2.5852	3.3176	3.2031	3.2066	2.9721	2.8249	2.9428	3.3742	3.2364	2.8335	2.1775	2.8182	2.8651	3.2425	2.9092	3.0954	2.4979	2.6427	3.0259	3.079	3.0182	3.0973	3.0683
pos_927	4-formyl Indole	metab_921	-	-	146.06	1.4616	pos	M+H-H2O, M+H	C9H7NO	54.2	-	-2.42641	-	0.0025	5.8524	6.2586	6.1881	5.5359	5.5281	5.3745	6.072	6.1168	6.1028	6.1616	5.6861	5.8507	6.0486	6.5215	6.5178	6.4854	6.0187	5.9644	6.2957	6.5517	6.3491	5.9909	6.0688	6.4101	5.7934	6.2391	6.2135	5.9471	6.0537	6.0406	6.1461	6.1219	6.2722	6.2861	6.2887
pos_928	metab_922	metab_922	-	-	540.801	0.5391	pos	-	-	-	-	-	-	0.0059	4.2858	4.6485	3.7859	4.6409	4.0691	4.4109	3.9699	3.7029	4.4135	4.2376	2.9879	4.4735	3.9231	3.0442	4.0169	3.7445	3.9472	2.9127	3.8536	3.4727	3.3581	3.9342	4.2407	3.5247	4.1882	4.5242	4.4183	4.3416	3.1005	4.4325	4.1876	4.2229	4.0776	4.0315	4.0673
pos_929	metab_923	metab_923	-	-	191.106	1.4804	pos	-	-	-	-	-	-	0.0096	3.749	4.1087	3.998	3.7047	3.5046	3.3196	3.6893	4.1794	3.9507	3.9917	4.2395	3.4174	3.8576	4.3741	4.3454	4.3932	4.2545	4.2339	4.1646	4.4513	4.3297	4.5458	3.7945	4.3001	3.7913	4.6553	4.208	4.2991	4.2896	4.1402	4.2368	4.2571	4.268	4.256	4.1863
pos_930	metab_924	metab_924	-	-	168.042	0.5391	pos	-	-	-	-	-	-	0.0036	4.1401	3.7411	4.4903	3.6003	4.097	3.7735	4.22	3.8196	3.781	3.8097	3.7635	3.5471	3.8451	4.0309	3.9001	3.9971	4.06	3.4452	3.8445	3.8508	3.7706	3.9564	3.7129	3.7529	4.0783	3.7197	3.643	4.0861	4.0293	3.7046	3.7222	3.8032	3.7761	3.7925	3.7547
pos_931	metab_925	metab_925	-	-	286.139	1.4804	pos	-	-	-	-	-	-	0.0083	3.8694	3.9935	3.6909	2.668	3.5001	2.6808	3.6959	3.9096	3.8049	3.9471	3.7429	3.4487	3.5043	4.2286	4.126	4.1073	3.8947	4.0307	4.0768	4.3387	4.2264	4.0115	3.85	4.2544	3.4043	4.3693	4.0102	3.6312	4.0023	3.7772	3.9597	3.8159	4.0106	4.1029	4.0432
pos_932	metab_926	metab_926	-	-	83.0494	1.4616	pos	-	-	-	-	-	-	0.0132	2.5945	3.0654	2.9674	2.4672	2.6714	2.4018	2.7848	2.9411	2.5768	3.0599	3.097	2.5362	2.8318	3.5259	3.3834	3.4385	2.9275	3.2002	3.3972	3.2762	3.0694	3.3564	2.7441	3.1948	2.8578	3.4248	3.1906	3.0313	3.22	3.05	3.1608	3.1668	3.291	3.2442	3.1763
pos_933	metab_927	metab_927	-	-	632.781	0.5391	pos	-	-	-	-	-	-	0.016	3.6109	4.0678	3.3591	4.5657	5.128	4.5151	5.1477	4.4082	4.6265	4.5543	4.6995	4.8457	3.31	3.5835	3.5653	3.5728	4.7157	4.6838	4.4483	4.6775	4.5476	3.5223	4.8124	4.665	3.4106	3.8173	3.6103	4.5555	3.6398	3.5529	3.5887	3.5767	4.2603	4.2156	4.3412
pos_934	metab_928	metab_928	-	-	205.096	1.4804	pos	-	-	-	-	-	-	0.0067	4.4619	4.737	4.4663	3.8628	4.3154	3.4595	4.4316	4.7113	4.5623	4.6635	4.9304	4.0495	4.2042	4.8847	4.9047	4.9554	4.6901	4.7323	4.9702	4.7596	4.8225	4.946	4.5762	4.8842	4.6797	5.1358	5.0782	4.7762	5.0555	4.843	4.9897	4.9487	4.8328	4.8797	4.8894
pos_935	metab_929	metab_929	-	-	544.191	1.4804	pos	-	-	-	-	-	-	0.0075	3.8374	4.6034	4.2616	3.1832	3.3253	2.9113	4.1971	4.5351	4.3906	4.6049	4.3604	3.9204	3.9581	4.9655	4.9068	4.8961	4.5595	4.7617	4.8494	4.9359	4.9705	4.7231	4.5515	4.8825	4.2151	4.8225	4.8691	4.3869	4.5021	4.5241	4.6038	4.5665	4.7613	4.6791	4.7343
pos_936	metab_930	metab_930	-	-	226.07	1.4804	pos	-	-	-	-	-	-	0.0018	4.5196	4.8494	4.2821	3.8126	4.2986	3.6981	4.4671	4.7773	4.5628	4.5744	4.9602	4.2054	4.2514	4.7743	4.8456	4.8021	4.4527	4.4788	4.871	4.5273	4.6135	4.7893	4.5645	4.7348	4.5539	5.1014	5.0723	4.521	5.1037	4.8536	4.9981	4.9878	4.8049	4.7971	4.8158
pos_937	metab_931	metab_931	-	-	187.096	1.4804	pos	-	-	-	-	-	-	0.0086	3.9186	3.8627	3.844	3.9571	3.9371	3.8959	3.9459	3.8349	3.8766	4.011	4.0006	3.8556	3.9966	4.0722	3.9248	4.1084	3.8279	4.0282	3.9373	4.0117	3.9506	4.0844	3.8025	4.0325	3.9901	4.3133	4.1381	4.0976	4.3018	4.1489	4.1366	4.1663	4.0944	4.0313	3.9999
pos_938	metab_932	metab_932	-	-	291.079	1.4804	pos	-	-	-	-	-	-	0.0176	3.2952	3.8659	3.3514	2.4751	2.7349	2.4879	3.36	3.7984	2.6233	3.3682	3.5726	2.8961	2.557	4.0356	3.8637	3.8487	3.6717	3.9533	3.6933	3.8901	3.6767	4.6513	2.6416	3.6634	3.4659	4.0559	3.1398	3.5995	3.6077	3.3903	3.5248	3.6446	3.8484	3.7781	3.6651
pos_939	metab_933	metab_933	-	-	734.809	0.5391	pos	-	-	-	-	-	-	0.0296	3.6495	3.8152	2.9756	4.1082	4.9257	3.9867	5.1216	4.068	4.3018	4.2679	4.5194	4.4775	2.9265	3.1999	3.6152	3.1892	4.3837	5.0274	4.1065	4.3876	4.1072	3.1387	4.4639	4.6151	3.0271	3.5304	3.2267	4.262	3.2562	3.1693	3.2051	3.1931	3.9255	3.6782	3.7821
pos_940	metab_934	metab_934	-	-	281.148	1.4804	pos	-	-	-	-	-	-	0.0168	3.7783	4.2591	3.9123	3.0591	3.3697	2.7355	4.1453	4.2902	3.7465	3.9929	4.4763	3.3103	3.6747	4.6061	4.5719	4.4856	3.9504	4.3922	4.4839	4.4664	4.4966	4.8426	3.952	4.508	3.6811	4.6161	4.6699	4.1668	4.7474	4.2025	4.3472	4.3731	4.3277	4.4574	4.49
pos_941	metab_935	metab_935	-	-	539.141	1.4993	pos	-	-	-	-	-	-	0.0078	5.6326	6.0266	6.1663	4.4813	5.0045	4.7651	5.9922	6.0628	6.0572	6.0768	5.323	5.5273	5.5665	6.2003	6.2359	6.2028	6.0211	5.8893	6.057	6.4403	6.2083	5.5259	6.0536	6.1737	5.6785	5.7959	6.0418	5.9393	5.8723	5.9543	5.9697	5.9174	6.135	6.0364	6.1027
pos_942	metab_936	metab_936	-	-	818.77	0.5391	pos	-	-	-	-	-	-	0.0013	3.0355	3.1446	3.0126	3.6499	4.9968	3.6266	5.3347	3.4164	3.03	3.6818	4.6736	4.22	2.9635	3.2369	3.2188	3.2262	4.1248	5.218	4.2384	4.5629	3.9843	3.1758	4.0595	4.8211	3.0641	3.2842	3.2637	3.1419	3.2932	3.2063	3.2422	3.2302	3.2187	3.2087	3.2139
pos_943	metab_937	metab_937	-	-	884.664	0.5391	pos	-	-	-	-	-	-	0.0136	4.2429	4.3074	3.1424	4.578	5.0278	4.6065	4.7496	4.7103	5.0647	4.9151	4.2672	5.0668	3.0933	3.3667	4.0095	3.356	4.9059	4.0768	4.0794	4.5539	4.5391	3.3684	4.9707	4.0047	3.1939	4.103	3.3935	4.8256	3.423	3.828	3.372	3.36	4.5561	4.4725	4.4132
pos_945	metab_939	metab_939	-	-	202.043	1.517	pos	-	-	-	-	-	-	0.0006	7.3495	7.1451	7.3297	7.4995	7.4255	7.4953	7.3586	7.2059	7.3624	7.3116	7.1954	7.4311	7.3707	7.0407	7.1112	7.0849	7.286	7.159	7.0882	7.2254	7.1661	7.0157	7.3297	7.1233	7.3751	7.0136	7.1219	7.3071	7.1432	7.304	7.2742	7.2857	7.2175	7.2105	7.2055
pos_946	metab_940	metab_940	-	-	141.01	1.517	pos	-	-	-	-	-	-	0.0021	5.625	5.4692	5.6291	5.7988	5.7268	5.7988	5.691	5.5242	5.6618	5.6269	5.5239	5.7538	5.6913	5.3725	5.4275	5.3837	5.6086	5.4863	5.4211	5.5122	5.4602	5.3399	5.6605	5.4172	5.6744	5.3315	5.4336	5.5946	5.4707	5.6178	5.5616	5.5907	5.5075	5.5349	5.5254
pos_947	metab_941	metab_941	-	-	183.02	1.517	pos	-	-	-	-	-	-	0.0028	5.2111	5.0161	5.1794	5.3408	5.288	5.3407	5.2303	5.0795	5.2663	5.1919	5.0565	5.2827	5.2645	4.9063	4.9428	4.9379	5.1258	5.0037	4.9156	5.0651	4.9908	4.8792	5.2088	4.9216	5.2012	4.8981	4.9564	5.1517	4.9973	5.1888	5.1054	5.1403	5.0559	5.077	5.067
pos_948	metab_942	metab_942	-	-	638.069	1.517	pos	-	-	-	-	-	-	0.0057	5.4934	4.8037	5.5332	6.0403	5.8357	6.0195	5.432	5.141	5.4438	5.5389	4.7434	5.8234	5.725	4.6503	4.3956	4.7271	5.2792	4.9189	4.3612	5.0526	4.935	4.3526	5.4478	4.6493	5.4812	4.461	4.4406	5.2369	4.4701	5.0372	4.8577	5.0034	4.8304	4.8851	4.8413
pos_949	metab_943	metab_943	-	-	267.096	1.517	pos	-	-	-	-	-	-	0.0164	4.1464	4.57	4.1928	4.41	4.0662	4.3257	4.0733	4.6893	4.5707	4.6206	4.3761	4.2392	4.2422	4.8621	4.7981	4.837	4.5422	4.6485	4.8564	4.9189	4.6915	4.7711	4.4431	4.7362	4.3557	4.8268	4.7183	4.2589	4.015	4.6638	4.6914	4.8769	4.6808	4.7968	4.6858
pos_950	metab_944	metab_944	-	-	223.07	1.517	pos	-	-	-	-	-	-	0.0046	4.7666	4.8078	4.6923	4.6895	4.7454	4.552	4.7776	4.6786	4.6989	4.7162	4.786	4.4838	4.6648	4.7828	4.6375	4.7916	4.8249	4.7737	4.7939	4.9456	4.8431	4.6597	4.5808	4.7948	4.5505	4.6134	4.4767	4.6782	4.5453	4.6959	4.7724	4.7541	4.7566	4.76	4.8104
pos_951	metab_945	metab_945	-	-	154.036	1.517	pos	-	-	-	-	-	-	0.0161	4.853	4.6351	4.7808	5.0474	5.0162	4.9355	4.8057	4.719	4.8218	4.7448	4.5505	4.9085	4.8065	4.4349	4.5607	4.5097	4.8069	4.6364	4.5333	4.6231	4.6115	4.4562	4.8049	4.4446	4.8705	4.5188	4.592	4.7958	4.4209	4.6086	4.5889	4.8491	4.7279	4.6966	4.6434
pos_952	metab_946	metab_946	-	-	202.12	1.517	pos	-	-	-	-	-	-	0.0091	4.7213	4.5755	4.6891	4.8316	4.7164	4.8477	4.7823	4.4341	4.7647	4.5743	4.6255	4.7194	4.5874	4.4143	4.3654	4.2876	4.6966	4.5382	4.1843	4.4555	4.405	4.3057	4.6271	4.1491	4.7247	4.3046	4.355	4.609	4.3274	4.6487	4.6604	4.7052	4.5167	4.4877	4.5449
pos_953	metab_947	metab_947	-	-	182.036	1.517	pos	-	-	-	-	-	-	0.0137	4.6787	4.4176	4.5746	4.9617	4.7237	4.9452	4.6078	4.3403	4.6068	4.5405	4.408	4.663	4.7846	4.2829	4.1307	4.3478	4.5656	4.3782	4.3402	4.4276	4.4956	4.0715	4.2733	4.262	4.6428	4.0101	4.2197	4.4958	4.1442	4.566	4.4636	4.537	4.4481	4.3186	4.4796
pos_954	metab_948	metab_948	-	-	437.033	1.517	pos	-	-	-	-	-	-	0.0053	5.4319	5.0107	5.3268	5.7676	5.5632	5.8062	5.4806	5.1328	5.5013	5.3362	5.0027	5.5931	5.5978	4.7315	4.7639	4.88	5.2984	5.0005	4.7467	5.0275	4.8683	4.182	5.3848	4.7772	5.4253	4.346	4.69	5.3081	4.5724	5.2934	5.0736	5.1157	5.0649	5.0898	5.1013
pos_955	metab_949	metab_949	-	-	262.127	1.5365	pos	-	-	-	-	-	-	0.0105	4.3578	4.5278	4.1866	1.0321	4.1102	1.0438	4.1056	4.6991	4.747	4.6515	4.9368	3.1544	3.8161	4.8427	4.8675	4.8455	4.705	4.673	4.9825	4.9947	5.1868	5.0201	4.7514	5.097	4.0386	5.1515	4.9199	4.6954	4.9473	4.841	4.8561	4.9048	4.7921	4.8725	4.8618
pos_956	metab_950	metab_950	-	-	267.133	1.5365	pos	-	-	-	-	-	-	0.0044	5.0795	5.2258	4.9567	2.8917	5.0042	2.8693	5.1173	5.5696	5.2191	5.084	5.2358	4.4482	4.594	5.0384	5.1392	5.0339	5.1715	5.2068	5.4566	5.4454	5.4946	4.9768	5.2391	5.6681	4.8423	5.3357	5.5779	5.2363	5.7561	5.3925	5.6504	5.4695	5.3011	5.2548	5.3169
pos_957	metab_951	metab_951	-	-	666.822	0.5391	pos	-	-	-	-	-	-	0.0243	2.7623	2.8714	2.7395	3.9809	5.0628	3.6844	5.3928	3.3028	3.7037	3.6029	4.7479	4.2487	2.6904	3.0178	2.9455	2.9529	4.0828	5.3045	4.1958	4.5723	4.1949	2.9026	4.2667	4.854	2.8215	3.0109	2.9904	3.6489	3.0199	2.9331	2.9689	2.9569	3.5442	3.3942	3.3173
pos_958	metab_952	metab_952	-	-	404.827	0.5391	pos	-	-	-	-	-	-	0.0095	4.1156	4.3006	4.2017	3.9599	3.108	3.982	2.6552	3.2502	3.9343	3.6356	2.8029	3.6292	4.3977	4.398	3.5799	4.2378	3.2574	3.1486	2.8067	2.8157	2.7883	3.9468	3.3718	2.8041	4.8752	4.2679	4.6583	3.905	3.7021	4.8777	4.8743	4.7085	3.627	3.5924	3.5573
pos_959	metab_953	metab_953	-	-	580.768	0.5391	pos	-	-	-	-	-	-	0.0046	4.9294	4.8228	4.2968	4.8975	5.2685	5.0127	5.0914	4.9276	5.2477	5.1709	4.8408	5.1917	4.2051	3.3487	4.5459	4.2901	5.1388	4.4471	4.5749	4.9197	4.8647	4.2939	5.2176	4.6452	3.1759	4.6627	4.2673	5.1596	3.405	4.2148	3.8406	4.2585	4.8771	4.9168	4.8989
pos_960	metab_954	metab_954	-	-	135.055	1.5554	pos	-	-	-	-	-	-	0.0029	4.2826	4.356	4.4017	3.9015	4.2553	3.7689	4.2237	4.4657	4.2911	4.4027	4.6322	4.1224	4.3788	5.0632	4.9272	4.9703	4.8145	4.5412	4.9463	4.8054	4.4861	5.1717	4.2392	4.7428	4.3616	5.108	5.0276	4.6261	4.9974	4.7568	4.8606	4.8295	4.8156	4.8301	4.8069
pos_961	metab_955	metab_955	-	-	664.729	0.5391	pos	-	-	-	-	-	-	0.0028	5.145	4.9088	4.4127	4.9613	5.2652	5.0645	4.958	5.0549	5.3114	5.2759	4.7009	5.2388	4.404	4.0758	4.7349	4.3921	5.2007	4.4137	4.5307	4.8693	4.8763	4.3604	5.3122	4.4274	3.9028	4.7788	4.4897	5.2868	4.1321	4.3977	4.081	4.4255	4.9629	4.9321	4.9592
pos_962	metab_956	metab_956	-	-	265.117	1.5554	pos	-	-	-	-	-	-	0.003	4.9291	4.8277	4.8832	4.9848	5.0226	5.0907	4.9542	4.8551	4.8985	4.8318	4.81	4.9411	4.9962	4.9421	4.8706	4.9068	4.8867	4.7454	4.8895	4.8654	4.8391	4.8989	4.8403	4.8113	5.0644	5.3404	5.2404	5.0877	5.31	5.1839	5.2465	5.202	5.0343	5.0582	5.0166
pos_963	metab_957	metab_957	-	-	532.28	1.5554	pos	-	-	-	-	-	-	0.0054	4.6077	5.8024	4.8518	2.9268	3.0023	2.9396	3.078	5.2658	4.4267	5.1207	3.9226	5.3468	3.443	4.1836	4.9655	4.6714	3.1155	5.3033	5.017	3.5738	3.2112	3.2211	4.979	4.4377	3.1094	3.3295	3.309	4.1321	3.3385	3.2516	3.2875	3.2755	4.7132	4.7694	4.751
pos_964	metab_958	metab_958	-	-	209.128	1.5554	pos	-	-	-	-	-	-	0.0064	3.5918	4.2256	3.7414	3.3927	3.7545	3.5809	3.8753	4.1842	4.0734	4.2518	4.5158	4.1699	4.1621	4.766	4.575	4.7299	4.0551	4.0706	4.3643	4.3535	4.4191	4.2775	3.9776	4.3331	3.906	4.3205	4.1655	3.8415	4.1974	4.0372	4.1276	4.1159	4.4056	4.3882	4.3686
pos_965	metab_959	metab_959	-	-	282.144	1.5554	pos	-	-	-	-	-	-	0.0057	4.189	4.6466	4.0074	2.8717	3.9971	1.2162	4.2409	4.4614	3.9734	3.9354	4.5228	3.1563	3.8158	4.6398	4.5911	4.5002	4.0865	4.2205	4.6902	4.4882	4.543	4.6169	4.1968	4.6693	4.5101	5.1547	5.109	4.6929	5.1384	4.9083	5.0493	5.0096	4.7581	4.7336	4.7686
pos_966	metab_960	metab_960	-	-	181.06	1.5554	pos	-	-	-	-	-	-	0.0016	5.0528	5.1433	5.0911	4.4068	4.9669	4.256	4.9546	5.2229	4.9417	5.1861	5.4426	4.8304	4.998	5.6967	5.6091	5.6077	5.4189	5.3618	5.6738	5.5323	5.3145	5.9086	5.0399	5.4863	5.1495	5.902	5.7785	5.4327	5.8027	5.5695	5.655	5.6173	5.5601	5.5719	5.5495
pos_967	metab_961	metab_961	-	-	167.117	1.5554	pos	-	-	-	-	-	-	0.0073	3.4496	3.7579	3.4649	3.288	3.2911	3.4264	3.3009	3.6408	3.604	3.4517	3.7434	3.3939	3.4496	4.2433	4.0511	4.1896	3.5525	3.6741	3.8561	3.6573	3.7865	3.6739	3.2587	3.8436	3.5938	4.0389	4.0553	3.4083	3.8458	3.7107	3.7716	3.8152	3.9021	3.9062	3.836
pos_968	metab_962	metab_962	-	-	192.065	1.5748	pos	-	-	-	-	-	-	0.0027	4.4608	4.8042	4.524	4.1682	4.2428	4.0925	4.5797	4.7041	4.6285	4.5712	4.9894	4.4821	4.4924	5.1451	5.0341	5.0445	4.5564	4.8597	4.9115	4.8208	4.848	5.0579	4.5166	4.8849	4.5217	4.9507	4.752	4.6432	4.657	4.6617	4.7173	4.6907	4.8825	4.8753	4.8647
pos_969	metab_963	metab_963	-	-	198.076	1.5748	pos	-	-	-	-	-	-	0.0055	3.8902	4.2504	3.8565	1.1131	3.611	2.8617	3.9499	4.1258	3.8897	3.8211	4.344	3.5508	3.7587	4.8182	4.6068	4.733	4.346	4.4883	4.7465	4.2932	4.2809	3.9842	3.8007	4.4848	4.3357	4.5698	4.7336	4.129	4.6253	4.3037	4.4653	4.3873	4.4387	4.5054	4.4629
pos_970	metab_964	metab_964	-	-	866.691	0.5391	pos	-	-	-	-	-	-	0.0071	4.1179	4.5007	2.8106	5.0091	5.6478	4.9825	5.563	4.798	5.233	5.0435	5.0948	5.3313	2.7615	3.0348	4.0142	3.0241	5.2635	4.987	4.8026	5.1655	4.9535	3.0517	5.2888	5.0914	2.862	4.2881	3.0616	5.0681	3.0911	3.0042	3.04	3.028	4.7033	4.6216	4.6719
pos_971	metab_965	metab_965	-	-	850.717	0.5391	pos	-	-	-	-	-	-	0.0191	2.9071	4.1448	2.8842	4.767	5.5068	4.7021	5.574	4.4929	4.8986	4.6303	4.9977	5.0823	2.8351	3.1085	3.7013	3.0978	4.9976	5.1016	4.7193	5.0448	4.815	3.0474	5.1177	5.0752	2.9357	3.6089	3.1353	4.7914	3.1648	3.0779	3.1137	3.1017	4.3264	4.3561	4.2415
pos_973	metab_967	metab_967	-	-	278.056	0.5188	pos	-	-	-	-	-	-	0.0118	4.1217	4.1995	4.2572	3.64	3.9439	3.9841	3.4124	3.8884	3.4917	3.6916	3.3636	3.9283	4.208	4.134	3.9362	4.1444	3.8373	2.8041	3.6233	3.6014	3.7262	4.3072	3.7617	3.3717	4.3176	3.5792	4.1384	4.0023	3.7192	4.1392	4.0387	4.0831	3.9256	4.0544	3.9984
pos_974	metab_968	metab_968	-	-	239.138	1.5748	pos	-	-	-	-	-	-	0.0048	4.2146	4.3084	4.0397	3.5024	4.0312	3.7408	4.1547	4.1911	4.0635	4.1256	4.3662	4.0914	4.0519	4.5307	4.5028	4.5155	4.2704	4.3331	4.4072	4.2858	4.2443	4.4549	4.0376	4.3435	3.9924	4.1401	4.227	4.1307	4.3362	4.1369	4.1806	4.1714	4.3076	4.3582	4.3216
pos_975	metab_969	metab_969	-	-	189.159	0.5391	pos	-	-	-	-	-	-	0.0016	5.9799	5.9415	6.0931	5.8023	5.9783	5.5989	6.0001	6.0674	6.0405	6.0368	6.0566	5.8532	5.9797	6.1437	6.0662	6.1397	6.0365	5.883	6.1114	6.1618	5.9806	6.0568	5.9905	6.0273	5.9191	5.964	5.8379	5.9674	5.9649	5.909	5.9067	5.8951	6.0472	6.0381	6.025
pos_976	metab_970	metab_970	-	-	136.039	1.5945	pos	-	-	-	-	-	-	0.0047	4.3749	4.7248	4.5012	4.1422	4.3163	4.129	4.777	4.8123	4.338	4.6085	4.7602	4.4283	4.4702	4.999	4.9558	4.9453	4.54	4.7215	4.9722	4.89	4.9263	5.1241	4.5981	4.9759	4.7747	5.2672	4.5633	4.714	4.812	4.9471	4.9725	4.8874	4.8863	4.9339	4.9198
pos_977	metab_971	metab_971	-	-	250.073	1.5945	pos	-	-	-	-	-	-	0.0039	2.5983	4.18	2.5755	3.4174	2.8398	3.326	2.6259	4.1971	3.7206	3.9155	4.2151	3.5826	4.0185	4.6537	4.4683	4.6279	3.9261	4.3479	4.6085	4.5451	4.4802	4.5065	4.0999	4.392	3.1539	4.5325	4.5253	3.2338	4.3547	4.1765	4.3162	4.3482	4.4501	4.4069	4.4477
pos_978	metab_972	metab_972	-	-	353.101	1.5945	pos	-	-	-	-	-	-	0.0073	3.8552	3.6692	4.1224	2.3951	3.4588	2.4079	4.155	4.2089	3.4238	4.1995	4.449	2.4497	3.7767	4.6821	4.5696	4.6698	4.2514	4.8617	4.7248	4.5135	3.8395	4.2115	4.1891	4.4468	4.0655	4.5382	4.5691	4.3177	4.6664	4.4295	4.471	4.4207	4.3585	4.3983	4.3281
pos_979	metab_973	metab_973	-	-	108.044	1.5945	pos	-	-	-	-	-	-	0.0062	4.1309	4.0253	4.0984	4.1513	4.1776	4.2348	4.1059	4.0564	4.0793	4.0874	4.1133	4.1415	4.1764	4.1562	4.1131	4.1419	4.0528	3.9823	4.0994	4.1479	4.0525	4.2013	4.0877	4.0253	4.2231	4.2644	4.1782	4.2301	4.3206	4.2346	4.2354	4.19	4.1582	4.1432	4.0987
pos_980	metab_974	metab_974	-	-	371.144	1.6153	pos	-	-	-	-	-	-	0.0057	4.1046	4.511	4.3853	2.999	3.5458	3.0119	4.2652	4.5724	4.0645	4.1733	4.1284	3.8517	3.9951	4.8715	4.7199	4.8825	4.4038	4.6589	4.7518	4.5899	4.5492	4.1911	4.2434	4.6248	4.1904	4.4423	4.3908	4.3545	3.769	4.3006	4.2257	4.2914	4.5293	4.5976	4.5543
pos_981	metab_975	metab_975	-	-	234.006	1.5945	pos	-	-	-	-	-	-	0.0037	3.5665	4.0763	3.7905	3.3324	3.5382	3.1622	4.1556	4.1216	3.5631	4.0221	4.092	3.7994	3.7337	4.3402	4.2587	4.2575	3.8769	4.0529	4.2989	4.2034	4.2965	4.3942	3.9414	4.3079	4.2114	4.6418	3.8041	4.0762	4.012	4.3273	4.3656	4.2924	4.2954	4.2775	4.272
pos_982	metab_976	metab_976	-	-	868.464	1.5945	pos	-	-	-	-	-	-	0.0054	5.2556	6.1184	5.3477	4.7011	4.3248	2.6106	2.7488	5.9441	5.0211	5.81	5.0603	5.8342	4.9633	4.8427	5.6449	5.4342	4.4567	5.8759	5.7052	4.6765	4.6592	2.8918	5.7425	5.2286	3.1735	3.0002	3.7149	4.8176	4.6752	3.0389	3.4439	2.9462	5.3545	5.286	5.3163
pos_983	metab_977	metab_977	-	-	374.143	1.5945	pos	-	-	-	-	-	-	0.0089	3.1403	3.974	2.7286	1.7233	2.6503	1.736	3.9283	3.7122	1.8696	3.2875	4.3607	3.0836	1.804	4.3467	4.157	4.1606	3.7914	3.9098	3.7919	3.9229	4.029	3.8636	2.8529	3.853	3.7123	4.2388	3.9103	4.2913	4.4846	3.8305	3.9897	3.9057	3.998	4.0126	3.9295
pos_984	metab_978	metab_978	-	-	110.06	1.6353	pos	-	-	-	-	-	-	0.0009	4.4666	4.3184	4.4316	4.4885	4.4776	4.5369	4.4224	4.3765	4.5696	4.5873	4.8271	4.5426	4.6782	4.9246	4.8447	4.8799	4.4105	4.4328	4.4891	4.4469	4.3859	4.4246	4.424	4.4341	5.0445	5.3673	5.2029	5.1104	5.2961	5.1781	5.2333	5.1928	4.9241	4.9326	4.9353
pos_985	metab_979	metab_979	-	-	216.122	1.6153	pos	-	-	-	-	-	-	0.0022	4.5793	4.6713	4.4542	4.2175	4.5032	4.1957	4.5344	4.6484	4.5675	4.5808	4.8844	4.3559	4.4426	4.8486	4.8341	4.7961	4.6395	4.6535	4.8061	4.7385	4.7239	4.8842	4.5315	4.7924	4.7362	5.1457	5.0456	4.9161	5.2879	5.0298	5.0952	5.0799	4.8696	4.8529	4.8472
pos_986	metab_980	metab_980	-	-	548.268	1.6153	pos	-	-	-	-	-	-	0.0061	4.2528	4.6632	4.3169	2.8141	4.2461	3.2276	4.2797	4.5899	4.507	4.4636	4.7169	3.9453	3.8513	4.8644	4.8413	4.7943	4.4043	4.9277	4.5606	4.8488	4.7417	4.8492	4.2995	4.7743	4.1142	4.4285	4.6114	3.8751	4.6804	4.2679	4.5099	4.4417	4.7095	4.6703	4.6321
pos_987	metab_981	metab_981	-	-	213.111	1.6153	pos	-	-	-	-	-	-	0.0081	3.5521	3.8002	3.3044	2.7727	3.3872	2.5522	3.4609	3.5796	3.7019	3.7773	3.9773	3.5021	3.6216	4.0431	4.0079	4.0754	3.5453	3.5314	3.8503	3.7052	3.6512	3.9362	3.5011	3.7372	4.0032	4.5054	4.3325	4.1584	4.5102	4.2476	4.3399	4.2737	4.0731	4.08	3.9965
pos_988	metab_982	metab_982	-	-	373.159	1.6153	pos	-	-	-	-	-	-	0.0038	3.5667	4.0871	3.8814	3.4126	3.7853	3.4254	3.7864	4.1367	4.3288	4.3247	4.8053	3.8267	4.4033	4.8556	4.7568	4.896	4.0361	4.1181	4.3334	4.1869	4.2336	4.1346	3.7271	4.1812	5.182	5.2296	5.0976	5.2637	5.1726	5.3133	5.2769	5.3074	4.942	4.936	4.9778
pos_989	metab_983	metab_983	-	-	362.216	1.6153	pos	-	-	-	-	-	-	0.0096	3.4429	3.6626	2.9443	3.5259	3.3888	3.2288	3.5298	3.7057	3.6797	3.6458	3.9224	3.6994	3.7046	4.2638	4.0545	4.2115	3.4686	3.8504	3.3571	3.676	3.8431	3.6983	3.1667	3.7288	3.5914	3.8499	3.8382	3.5854	3.8443	3.8229	3.9309	3.8052	3.8267	3.8574	3.9278
pos_990	metab_984	metab_984	-	-	241.154	1.6153	pos	-	-	-	-	-	-	0.0107	2.8202	3.3597	2.8643	2.2655	2.3407	2.5528	2.8216	3.3581	2.9747	3.4029	3.699	3.6932	3.0865	4.4507	4.1697	4.2439	3.2786	2.9321	3.4614	3.5597	3.3822	3.5905	2.7682	3.5215	2.7554	3.4844	3.4723	2.8468	3.688	3.4049	3.5322	3.3539	3.7433	3.6538	3.7538
pos_991	metab_985	metab_985	-	-	152.07	1.6153	pos	-	-	-	-	-	-	0.0021	4.2746	4.257	4.2678	3.9915	4.2229	4.0951	4.2728	4.3558	4.5087	4.5382	4.9568	4.3053	4.5751	5.0838	4.9848	5.0071	4.3411	4.4694	4.5714	4.4376	4.4396	4.4643	4.2439	4.4878	5.1375	5.5322	5.3364	5.2477	5.4319	5.311	5.3715	5.3455	5.05	5.0452	5.0657
pos_992	metab_986	metab_986	-	-	300.143	1.6353	pos	-	-	-	-	-	-	0.003	4.4114	4.745	4.2327	2.9763	4.3369	2.9347	4.2222	4.5905	4.2955	4.5239	4.6711	4.0279	4.1497	4.7983	4.8165	4.7243	4.3068	4.7999	4.7039	4.856	4.9883	4.8382	4.3008	4.9311	4.4282	5.0483	4.7299	4.5807	5.0105	4.819	4.8344	4.8698	4.7828	4.7496	4.7558
pos_993	metab_987	metab_987	-	-	310.164	1.6543	pos	-	-	-	-	-	-	0.0025	4.3403	4.7079	4.0123	3.7266	4.4195	3.3602	4.1073	4.3974	4.2382	4.1673	4.5532	4.1741	4.0198	4.8934	4.7632	4.8363	4.2443	3.9827	4.5867	4.5178	4.6233	5.0493	4.159	4.5409	4.9112	4.989	4.8683	4.5066	5.1916	4.9645	5.0417	4.9807	4.7907	4.7891	4.7635
pos_994	metab_988	metab_988	-	-	188.106	1.6353	pos	-	-	-	-	-	-	0.0051	3.4969	3.7497	3.2567	2.4737	3.3439	2.2638	3.8031	3.6963	3.5852	3.7119	4.2051	3.1232	3.0409	4.0056	4.1254	3.9744	3.7635	3.758	3.7854	3.6006	4.0543	4.8591	3.3794	3.8369	3.5911	3.9195	4.3198	3.7781	4.4204	3.9379	4.0354	4.0645	4.1092	4.0758	4.1291
pos_995	metab_989	metab_989	-	-	191.142	1.6353	pos	-	-	-	-	-	-	0.0021	4.0007	3.875	3.9278	4.0597	4.039	4.1162	3.9777	3.8641	4.0801	4.0155	3.9868	4.0391	4.0819	4.4322	4.2824	4.2957	3.9053	3.995	3.9371	3.9944	3.9813	3.9867	3.9715	3.9659	4.1113	4.0835	4.0641	4.0541	4.154	4.1355	4.1949	4.1615	4.0987	4.1155	4.122
pos_996	metab_990	metab_990	-	-	170.117	1.6751	pos	-	-	-	-	-	-	0.0015	3.9444	3.8694	3.8824	3.9667	4.0232	4.0292	3.925	3.858	3.8848	3.9729	4.0417	4.0887	4.0295	4.0968	4.0735	4.0367	3.864	3.8131	3.9631	3.894	3.9873	3.997	3.873	3.9007	4.0035	4.1424	4.1086	4.0155	4.2966	4.0597	4.1217	4.0463	4.0079	3.9966	3.9921
pos_997	metab_991	metab_991	-	-	183.101	1.6751	pos	-	-	-	-	-	-	0.002	4.8338	4.8293	4.6701	4.5304	4.7104	4.5436	4.756	4.7638	4.7619	4.817	4.9591	4.6759	4.6795	4.953	4.9685	4.9239	4.7499	4.7593	4.8991	4.8431	4.8488	4.9266	4.6702	4.8665	4.814	5.1961	5.0928	4.9428	5.2371	5.0414	5.0944	5.059	4.9561	4.9557	4.9391
pos_998	metab_992	metab_992	-	-	360.2	1.6353	pos	-	-	-	-	-	-	0.005	4.4392	4.573	4.43	3.1313	3.6878	2.5152	4.1687	4.5392	3.9143	4.4333	4.5594	3.8774	4.3442	5.1071	5.0061	5.0632	4.3037	4.5402	4.623	4.8141	4.4984	5.0074	4.2035	4.6076	4.4485	4.8907	4.8224	4.4331	5.0189	4.7752	4.8435	4.799	4.7554	4.7587	4.8147
pos_999	metab_993	metab_993	-	-	209.153	1.6353	pos	-	-	-	-	-	-	0.0124	3.2039	3.4336	3.2833	2.6608	3.1188	2.9746	3.2704	3.4573	3.176	3.3897	3.5135	3.2482	3.3147	3.6147	3.7058	3.407	3.2416	3.4014	3.4655	3.6337	3.5084	3.6577	2.8433	3.5871	3.5772	4.0344	3.811	3.6895	4.0445	3.8048	3.8556	3.7876	3.631	3.7165	3.5944
pos_1000	metab_994	metab_994	-	-	268.153	1.6751	pos	-	-	-	-	-	-	0.002	4.3774	4.511	4.3899	3.6242	4.3085	3.0474	4.4274	4.5319	4.3187	4.3332	4.7625	3.782	4.0324	4.6658	4.6293	4.6771	4.5335	4.708	4.7482	4.7665	4.8597	4.6625	4.3775	4.8209	4.2931	4.8846	4.6138	4.6074	4.8251	4.6946	4.7273	4.7237	4.6874	4.6793	4.693
pos_1001	metab_995	metab_995	-	-	218.138	1.6543	pos	-	-	-	-	-	-	0.0034	4.4185	4.3952	4.2456	4.1977	4.3692	4.2001	4.3383	4.3946	4.3648	4.5118	4.5065	4.2683	4.3347	4.5058	4.5886	4.6082	4.424	4.3958	4.4782	4.5714	4.5558	4.6674	4.3731	4.5516	4.3828	4.7473	4.6561	4.5151	4.7662	4.59	4.6449	4.6351	4.5545	4.5243	4.5452
pos_1002	metab_996	metab_996	-	-	303.154	1.6543	pos	-	-	-	-	-	-	0.0081	3.9428	4.816	3.4898	2.5292	3.8228	3.1339	3.8008	4.3806	3.9863	3.7777	4.3542	3.9831	3.3356	4.3947	4.2887	4.3712	3.8747	4.2597	4.357	4.075	4.4541	4.327	3.71	4.4532	4.345	4.6296	4.5548	4.1548	4.6295	4.4631	4.5353	4.4999	4.3833	4.3042	4.395
pos_1003	metab_997	metab_997	-	-	154.122	1.6543	pos	-	-	-	-	-	-	0.0124	3.7824	3.7455	3.6091	3.7209	3.688	3.6507	3.7457	3.6008	3.8422	3.858	3.6567	3.7308	3.7971	3.9453	3.9577	3.8615	3.8286	3.8362	3.7695	3.8556	3.8727	3.9776	3.8092	3.8448	3.8334	4.044	3.8292	3.8698	4.0186	3.8941	3.7994	3.8521	3.8856	3.7617	3.8579
pos_1004	metab_998	metab_998	-	-	376.122	1.6543	pos	-	-	-	-	-	-	0.0079	3.7227	4.2261	4.0408	3.1264	3.7347	3.1392	3.6724	4.2172	3.9005	3.8291	4.3003	3.8309	4.2007	4.2003	4.1348	4.1186	3.8923	4.3566	4.1611	4.5185	4.0291	3.9794	3.8082	4.1929	4.3408	4.6839	4.4753	4.2069	4.5667	4.4208	4.5247	4.4338	4.3045	4.2488	4.2461
pos_1005	metab_999	metab_999	-	-	256.117	1.6543	pos	-	-	-	-	-	-	0.0026	4.6479	4.8216	4.4869	3.0611	4.2148	2.4529	4.6975	4.7431	4.4119	4.4442	4.7632	3.6992	3.8825	4.9615	4.9103	4.8799	4.5046	5.0629	4.8215	4.8368	4.9715	5.0694	4.3869	4.9561	4.4993	5.1439	4.7677	4.6233	5.0336	4.8793	4.9568	4.8813	4.91	4.8822	4.9086
pos_1006	metab_1000	metab_1000	-	-	237.086	1.6543	pos	-	-	-	-	-	-	0.0024	5.0344	5.2713	5.1153	4.3557	4.6971	4.083	4.9606	5.2304	5.0728	4.9565	5.4508	4.6921	4.8492	5.2506	5.2438	5.2195	5.0496	5.2111	5.4993	5.2129	5.2606	5.5082	4.9218	5.3467	5.1718	5.5079	5.3313	5.3661	5.2715	5.2879	5.3093	5.3004	5.3043	5.2735	5.2906
pos_1007	metab_1001	metab_1001	-	-	415.158	1.6543	pos	-	-	-	-	-	-	0.015	3.247	3.9749	3.5374	3.2418	3.5081	3.3781	3.5501	3.6756	3.4134	3.5473	4.0426	3.3144	3.3554	3.9437	3.9243	4.1421	4.1869	4.1394	4.1815	4.0518	3.9885	3.7101	3.2585	4.0972	3.7698	4.5664	4.3521	3.9782	4.4288	4.2245	4.3675	4.312	4.0561	4.0354	4.1951
pos_1009	metab_1003	metab_1003	-	-	304.174	1.6543	pos	-	-	-	-	-	-	0.0074	3.7872	4.1757	3.6782	2.7047	3.5179	2.6843	3.6996	3.8919	3.6013	3.5935	3.9393	3.4516	3.5685	4.1683	4.1201	4.2125	3.9572	3.8098	4.0029	4.0992	3.9966	3.9863	3.6096	3.8794	3.9205	4.1936	4.064	4.2141	4.2776	4.2359	4.2529	4.2733	4.097	4.1378	4.1495
pos_1010	metab_1004	metab_1004	-	-	327.2	1.6153	pos	-	-	-	-	-	-	0.0039	4.6412	4.9686	4.454	4.3768	4.136	4.2861	4.1234	4.3412	4.046	4.6829	4.3594	4.6845	4.4778	4.6867	4.5771	4.6206	4.212	3.8855	3.8586	4.1545	3.9658	3.8525	4.229	3.8499	4.125	4.031	3.977	4.2277	4.1825	4.1437	4.0903	4.1155	4.3443	4.336	4.3517
pos_1011	metab_1005	metab_1005	-	-	328.101	1.6353	pos	-	-	-	-	-	-	0.0022	4.4721	4.6741	4.5093	3.1897	4.2106	3.147	4.4034	4.6348	4.9218	5.003	5.4558	4.5536	4.9923	5.5419	5.4548	5.4995	4.6047	4.6745	4.926	4.8055	4.837	4.3528	4.4475	4.8913	5.7068	6.0479	5.8661	5.8131	5.9534	5.8932	5.9272	5.9097	5.5772	5.5577	5.5917
pos_1012	metab_1006	metab_1006	-	-	128.019	1.6751	pos	-	-	-	-	-	-	0.012	3.8641	3.4292	3.711	4.0734	3.9868	4.1275	3.8058	3.489	3.8811	3.7599	3.3906	4.0153	4.0176	3.0421	2.9204	3.467	3.6952	3.1727	3.1378	3.367	3.413	2.0471	3.6772	3.1522	3.8568	2.9762	3.3024	3.6972	3.3332	3.6121	3.506	3.6356	3.5201	3.465	3.5442
pos_1013	metab_1007	metab_1007	-	-	153.09	1.6751	pos	-	-	-	-	-	-	0.0064	4.2188	4.3666	3.9722	3.8421	4.0893	3.913	4.0613	4.2343	4.035	4.1321	4.2415	3.9394	3.9937	4.2396	4.2937	4.2111	4.2049	4.1365	4.4322	4.224	4.1654	4.3405	4.0936	4.3083	4.2649	4.5792	4.6515	4.3816	4.7358	4.4149	4.5139	4.4716	4.3872	4.3414	4.3361
pos_1014	metab_1008	metab_1008	-	-	371.027	1.6751	pos	-	-	-	-	-	-	0.007	4.2601	4.4283	4.471	3.8781	4.5368	3.7195	4.3441	4.373	4.0769	4.1922	4.4208	4.3216	4.6387	4.3751	4.3874	4.5365	3.9311	3.9606	4.252	4.4758	4.61	4.0011	4.211	4.4619	4.9416	4.6818	4.5876	4.7433	4.7588	4.8757	4.8139	4.8211	4.5713	4.5595	4.5995
pos_1015	metab_1009	metab_1009	-	-	148.075	1.6751	pos	-	-	-	-	-	-	0.0023	4.376	4.0171	4.2359	3.8908	4.1978	3.8775	4.5711	4.393	4.2016	4.3881	4.2944	4.0694	4.6722	5.2713	5.1142	5.1711	4.0848	4.727	4.9487	4.4027	4.8956	4.0402	4.4959	4.8793	4.3555	4.5428	4.4016	4.4348	4.2087	4.2996	4.3447	4.2833	4.7885	4.8008	4.8083
pos_1017	metab_1011	metab_1011	-	-	204.981	1.6751	pos	-	-	-	-	-	-	0.0092	3.9379	4.0431	4.0569	3.1792	4.0779	3.1527	3.9374	3.915	3.5744	3.7902	3.9888	3.8686	4.2212	4.1543	4.0068	4.1847	3.6448	3.6117	3.9176	4.0829	4.1787	3.3277	3.7643	3.9901	4.4412	4.2653	4.1483	4.2917	4.2684	4.4334	4.3498	4.3651	4.2353	4.138	4.2096
pos_1018	metab_1012	metab_1012	-	-	303.133	1.6951	pos	-	-	-	-	-	-	0.0058	3.5491	3.9727	3.033	2.9019	3.2991	2.9147	3.4721	3.7633	3.0504	3.1985	3.8663	3.0148	2.9839	4.6755	4.2314	4.4802	3.6429	3.4123	3.8809	3.2914	3.6282	4.5261	3.4162	3.5978	3.6651	4.1358	4.2504	3.7806	4.1178	3.8518	4.0011	4.0302	3.9915	3.9817	3.9705
pos_1019	metab_1013	metab_1013	-	-	233.083	1.6751	pos	-	-	-	-	-	-	0.0155	3.3866	3.6723	3.5201	0.4538	3.6169	0.4622	3.4082	3.6137	2.9178	2.9876	3.3649	0.4902	2.5753	3.5733	3.4966	3.5538	3.6389	4.062	3.8094	3.8506	4.1503	3.5596	3.4987	3.9706	3.6727	3.9912	3.5091	3.7546	3.7853	3.8065	3.8697	3.7882	3.7766	3.7913	3.7756
pos_1020	metab_1014	metab_1014	-	-	301.084	1.6751	pos	-	-	-	-	-	-	0.0094	3.5223	4.1194	3.8462	2.3562	3.2913	2.369	3.6769	4.0266	3.9374	3.8535	4.0289	3.5667	3.6711	4.237	4.2039	4.2895	4.054	4.1915	4.3688	4.3821	4.1802	4.5116	3.9805	4.3545	3.6524	4.2185	4.2139	3.9354	3.8903	4.0128	4.1217	4.1136	4.2362	4.1329	4.2018
pos_1021	metab_1015	metab_1015	-	-	358.112	1.6951	pos	-	-	-	-	-	-	0.0044	3.8074	4.3117	4.3161	3.237	3.34	2.7968	4.1215	4.4578	3.9711	3.8141	4.6758	4.0386	4.6876	5.177	4.9679	5.0915	3.644	4.46	4.3183	4.6523	4.7047	2.918	3.7958	4.599	5.1882	4.9242	5.332	4.2306	5.592	5.1831	5.296	5.198	4.8741	4.871	4.9224
pos_1022	metab_1016	metab_1016	-	-	347.134	1.6951	pos	-	-	-	-	-	-	0.0041	4.3692	5.109	4.5088	2.7726	4.0775	2.7854	4.7516	4.0874	3.1955	4.6047	4.7676	3.5935	2.8545	3.2306	4.5705	3.6858	4.9197	3.8974	3.9531	4.5073	4.7996	4.1608	4.1596	4.1235	5.0841	3.2651	4.2851	5.402	5.4737	4.8049	4.2017	4.7882	4.6698	4.6839	4.7165
pos_1023	metab_1017	metab_1017	-	-	228.086	1.6951	pos	-	-	-	-	-	-	0.0014	3.1424	3.5628	3.1196	2.4352	2.9227	2.448	3.2262	3.4731	2.9376	3.209	3.5408	2.6595	2.517	4.1193	3.9046	4.0319	3.2543	3.3782	3.8255	3.5679	3.777	3.9078	3.1833	3.7513	4.0417	4.332	4.2088	3.5499	4.2649	4.0371	4.1064	4.0232	3.9022	3.9002	3.9019
pos_1024	metab_1018	metab_1018	-	-	537.138	1.7141	pos	-	-	-	-	-	-	0.0077	3.8317	3.9387	4.0271	2.7361	3.7584	2.7573	3.9592	4.1881	3.8537	4.217	3.9163	3.3531	3.834	4.8688	4.7417	4.7539	4.0989	4.4803	4.5898	4.3719	4.3889	4.7588	4.28	4.4678	3.8419	4.1326	4.2251	3.9867	4.0442	3.7884	3.8453	3.8361	4.4035	4.4621	4.4996
pos_1025	metab_1019	metab_1019	-	-	323.044	1.6951	pos	-	-	-	-	-	-	0.0164	3.143	3.4482	3.5986	2.8061	3.0604	2.819	3.1613	3.5313	2.9546	3.1156	3.5253	2.8609	3.8197	4.5714	4.0348	4.4931	2.9948	3.2908	3.897	3.9785	3.9805	3.1194	3.238	3.9459	3.8961	3.9586	3.8899	3.9047	3.8694	3.7376	3.8962	3.7829	4.1796	4.0708	4.2557
pos_1027	metab_1021	metab_1021	-	-	243.091	1.7141	pos	-	-	-	-	-	-	0.0031	3.9396	3.882	3.9537	2.9758	3.7189	3.5225	4.0482	4.0316	3.7614	4.0725	3.9974	3.5307	3.8845	3.8208	3.9792	3.8876	4.0804	3.8752	3.9259	4.2829	4.3669	4.2116	4.0163	4.2237	4.0926	3.8443	3.9275	4.128	4.6044	4.0015	4.1154	4.027	4.1253	4.1199	4.1396
pos_1028	metab_1022	metab_1022	-	-	162.127	1.6951	pos	-	-	-	-	-	-	0.0083	4.0644	3.6882	3.9729	4.2785	4.2079	4.3339	4.0177	3.7285	4.0295	3.9626	3.7129	4.1887	4.1957	3.7186	3.6192	3.7683	3.9199	3.7249	4.3282	3.8171	3.6533	3.4514	3.9689	3.7918	4.0005	3.4393	3.6235	4.0037	3.7621	3.9039	3.8452	3.9222	3.9117	3.8336	3.8757
pos_1029	metab_1023	metab_1023	-	-	121.064	1.7357	pos	-	-	-	-	-	-	0.0034	4.3078	4.4767	4.2053	3.8014	4.1732	3.7498	4.2043	4.3134	4.1581	4.315	4.6038	4.0741	4.2788	4.8058	4.6963	4.7403	4.3184	4.1329	4.5791	4.6206	4.5222	5.0012	4.3389	4.5171	4.6738	4.8485	5.0154	4.4819	5.0229	4.742	4.7983	4.8039	4.6653	4.6791	4.6932
pos_1030	metab_1024	metab_1024	-	-	343.143	1.7141	pos	-	-	-	-	-	-	0.0073	4.2159	4.0562	4.3219	3.2207	3.6104	3.3102	4.1087	4.3573	3.7162	4.3002	4.2379	3.2756	4.0152	4.5505	4.4801	4.5334	4.2752	4.5631	4.6804	4.7279	3.72	4.8548	4.4096	4.3013	4.2562	3.8173	4.1047	4.1521	4.3844	4.0695	4.0374	4.0494	4.3579	4.4189	4.4436
pos_1031	metab_1025	metab_1025	-	-	129.065	1.7141	pos	-	-	-	-	-	-	0.0138	3.7616	3.9175	3.7874	3.7025	3.6422	3.6486	3.6022	3.724	3.8962	3.6036	3.777	3.7414	3.6557	3.8421	3.8605	3.9673	3.7376	3.8166	3.8953	3.9625	4.0271	4.0836	3.8493	4.0062	3.7955	4.0016	3.7829	3.9053	3.7843	3.8184	3.8168	3.8062	3.757	3.8485	3.879
pos_1032	metab_1026	metab_1026	-	-	259.164	1.7141	pos	-	-	-	-	-	-	0.0106	3.7654	3.7459	3.8228	3.255	3.6813	3.1411	3.9454	3.8249	3.9294	3.9629	3.982	3.4786	3.9318	4.1565	4.1184	4.2886	3.987	4.0916	4.0266	4.2714	4.0694	4.084	3.805	4.0892	4.1	4.115	4.4506	3.9129	4.4414	4.2932	4.2702	4.348	4.1288	4.1676	4.1831
pos_1033	metab_1027	metab_1027	-	-	234.075	1.7141	pos	-	-	-	-	-	-	0.0055	3.4705	3.6453	3.6674	2.2266	3.2692	2.6099	3.3787	3.6195	3.6918	3.585	3.6314	3.17	3.4072	3.672	3.5616	3.5941	3.486	3.7517	3.8062	3.6683	3.7796	3.8433	3.4397	3.8215	3.6842	3.928	3.5636	3.9295	3.5555	3.6739	3.6007	3.6658	3.7139	3.6594	3.6992
pos_1034	metab_1028	metab_1028	-	-	280.096	1.7141	pos	-	-	-	-	-	-	0.0202	4.0574	3.5897	3.9972	3.1483	3.7722	3.6195	3.9278	3.7928	3.776	3.7917	3.8765	3.5594	3.8436	3.6247	3.4416	3.7037	4.0074	3.7745	3.6946	4.0073	3.654	3.711	3.9912	3.5925	3.9	3.5021	3.4293	3.9861	4.0277	3.8521	3.6685	3.7311	3.8034	3.8824	3.8245
pos_1035	metab_1029	metab_1029	-	-	516.221	1.7141	pos	-	-	-	-	-	-	0.008	4.1323	4.0046	4.3367	3.2018	3.2773	3.2146	4.092	4.5086	3.5164	4.3563	4.2896	3.2566	3.8202	4.8461	4.7132	4.8093	4.4362	4.8175	4.9968	4.9498	3.4863	5.1597	4.472	4.5051	4.2233	4.0729	4.3504	4.0505	4.4438	4.1838	4.2011	4.1896	4.5491	4.618	4.6075
pos_1036	metab_1030	metab_1030	-	-	111.039	1.7764	pos	-	-	-	-	-	-	0.0057	4.3947	4.1843	4.4304	4.4411	4.4328	4.5136	4.37	4.2346	4.3038	4.3263	4.216	4.3991	4.4821	4.1149	4.1483	4.2412	4.3347	4.1623	4.1821	4.324	4.1091	4.1223	4.3989	4.0961	4.3143	4.0418	4.0836	4.3305	4.1499	4.3136	4.2555	4.2734	4.2038	4.2378	4.2627
pos_1037	metab_1031	metab_1031	-	-	129.102	1.7357	pos	-	-	-	-	-	-	0.0021	4.5259	4.4477	4.5922	4.5915	4.6415	4.7123	4.5369	4.3901	4.5024	4.6896	4.5209	4.5344	4.5984	4.3047	4.5224	4.4077	4.5663	4.4862	4.3188	4.6062	4.9035	4.518	4.3925	4.6458	4.5712	4.2566	4.3286	4.4815	4.3626	4.4463	4.3669	4.4307	4.5395	4.5229	4.5131
pos_1038	metab_1032	metab_1032	-	-	600.823	1.7141	pos	-	-	-	-	-	-	0.0038	5.0631	6.2954	5.293	3.9514	3.7256	2.626	3.002	5.7606	5.1195	5.4988	4.4761	5.7023	4.8359	4.8543	5.4463	5.264	4.1975	5.6551	5.4106	4.3084	3.8503	3.2937	5.4592	5.0468	2.7956	3.0155	3.8619	4.6957	3.2097	3.3303	3.0156	3.7259	5.2564	5.2675	5.2705
pos_1039	metab_1033	metab_1033	-	-	185.08	1.7357	pos	-	-	-	-	-	-	0.013	3.6739	3.1772	3.0053	2.8492	3.0558	2.8641	3.1112	3.0498	3.9932	3.861	4.0697	3.5161	3.4122	4.1305	4.1198	4.1175	2.9818	3.2432	3.2595	2.9506	3.4194	4.4617	2.6674	3.1555	4.2408	4.5787	4.6224	4.1834	4.6781	4.3779	4.4755	4.4742	4.1999	4.0749	4.1696
pos_1040	metab_1034	metab_1034	-	-	535.122	1.7357	pos	-	-	-	-	-	-	0.0155	4.481	4.1084	4.6147	2.8033	4.0335	3.6811	4.5854	4.6918	4.1214	4.571	4.5349	3.5413	4.1668	4.6707	4.6406	4.6212	4.5046	4.6628	4.6347	4.7307	4.3429	4.1496	4.6665	4.455	4.2525	4.0575	3.9944	4.2329	3.8442	4.0112	4.1832	3.9452	4.5981	4.5572	4.4122
pos_1041	metab_1035	metab_1035	-	-	85.065	1.7141	pos	-	-	-	-	-	-	0.0034	3.6749	3.6568	3.819	3.1772	3.4674	3.3425	3.7401	3.9317	3.428	3.7956	3.879	3.3392	3.5622	4.2251	4.1607	4.1609	3.8214	4.161	4.2714	4.2103	3.6367	4.4029	3.8736	4.0244	3.7901	3.7924	3.8233	3.6754	3.8537	3.6908	3.7069	3.6628	3.9874	3.9655	3.9953
pos_1042	metab_1036	metab_1036	-	-	372.096	1.7141	pos	-	-	-	-	-	-	0.0075	4.3262	4.1102	4.3886	3.263	4.1128	3.9854	4.2954	4.3221	4.1153	4.3785	4.1821	3.873	4.2209	4.3818	4.1423	4.4196	4.4012	4.448	4.2285	4.5704	3.9396	4.6036	4.4245	4.1247	4.3815	3.8238	3.9951	4.2375	4.0081	4.1549	4.0557	4.0019	4.3755	4.3252	4.3902
pos_1043	metab_1037	metab_1037	-	-	417.059	1.756	pos	-	-	-	-	-	-	0.0031	5.2954	5.1325	5.399	5.1219	5.1964	5.196	5.3401	5.2437	5.2954	5.3041	5.1861	5.1422	5.3275	4.9031	4.9454	5.023	5.3232	5.1483	4.9423	4.9993	5.1642	4.2718	5.3297	5.0573	5.0098	4.8421	4.9597	5.2161	4.3893	5.0491	4.9134	5.0237	5.0921	5.0793	5.0759
pos_1044	metab_1038	metab_1038	-	-	340.091	1.756	pos	-	-	-	-	-	-	0.0063	5.7202	5.9359	6.0885	5.1854	5.8386	5.2354	5.9238	6.0103	5.7446	5.8959	6.1068	5.412	5.6358	5.8003	6.0892	5.8327	5.9268	6.0821	5.9679	5.6834	6.088	3.8638	5.9251	6.0476	5.4741	5.9444	6.1879	5.8936	5.909	5.683	5.8158	5.819	5.9138	6.0139	5.9342
pos_1045	metab_1039	metab_1039	-	-	539.141	1.6951	pos	-	-	-	-	-	-	0.0055	2.424	2.0928	2.8966	2.084	1.907	2.5277	3.1756	3.5585	2.0843	3.1151	2.1285	2.4959	3.3415	4.3239	4.3932	4.2657	2.019	3.9512	4.0145	3.2337	4.0058	3.8108	3.5793	4.0724	3.4951	4.096	4.2121	3.8084	4.2816	3.911	4.0471	3.9738	4.0989	4.0787	4.1265
pos_1046	metab_1040	metab_1040	-	-	327.144	1.6951	pos	-	-	-	-	-	-	0.0069	3.6161	4.2328	3.9772	2.9465	3.5955	2.9593	3.8302	4.2826	3.6441	3.7609	4.2783	3.0013	3.6269	4.5026	4.5279	4.4849	3.9188	4.3341	4.512	4.5346	4.547	4.4717	3.9058	4.5623	4.0772	4.6379	4.5193	4.0988	4.6013	4.3546	4.4059	4.4049	4.4147	4.3589	4.4418
pos_1047	metab_1041	metab_1041	-	-	109.101	1.8173	pos	-	-	-	-	-	-	0.0071	3.9227	4.1456	3.8407	3.6497	3.8272	3.7014	3.8856	3.9686	3.9277	3.9378	4.2105	3.7975	3.8553	4.096	4.1902	4.0596	3.9843	3.9377	4.2565	4.065	4.0084	4.6059	3.9172	4.0771	4.1174	4.3978	4.5137	4.1974	4.5665	4.2663	4.3871	4.3247	4.2506	4.168	4.2183
pos_1048	metab_1042	metab_1042	-	-	677.86	1.7764	pos	-	-	-	-	-	-	0.0091	4.9487	6.2417	5.3361	3.7052	3.894	2.9522	3.0906	5.6721	5.04	5.4247	4.6212	5.6304	4.9125	4.8136	5.3827	5.2282	3.6242	5.6837	5.4019	4.0686	3.6544	3.2337	5.3585	4.9368	3.122	3.3421	3.3217	4.5939	3.468	3.2643	3.4994	3.4118	5.1795	5.2324	5.1248
pos_1049	metab_1043	metab_1043	-	-	287.033	1.7764	pos	-	-	-	-	-	-	0.0048	4.4525	4.2221	4.1011	4.1682	4.4568	3.9828	4.3253	4.1395	4.3821	4.359	4.2433	4.2414	4.0882	4.3857	4.2827	4.4054	4.2654	3.9021	4.2574	4.4018	4.0964	4.4828	4.2258	4.1636	4.3774	4.266	4.295	4.282	4.5357	4.4661	4.4297	4.4765	4.3602	4.356	4.3258
pos_1050	metab_1044	metab_1044	-	-	342.076	1.8379	pos	-	-	-	-	-	-	0.0051	4.1193	3.6836	3.6172	3.8769	3.8786	3.9105	4.0358	3.8866	4.0968	4.1522	3.7757	3.8977	3.976	2.6842	3.7448	3.3395	3.8015	3.8026	3.6465	4.1106	3.833	2.5753	4.0882	4.0112	4.0077	2.4309	3.6585	4.1298	4.5671	4.3794	4.198	4.261	3.7471	3.7767	3.7234
pos_1051	metab_1045	metab_1045	-	-	462.232	1.6751	pos	-	-	-	-	-	-	0.0095	2.6874	3.5213	3.534	2.5336	2.609	2.5464	2.6846	3.8034	2.6819	3.1133	3.9483	2.5883	2.6155	2.8886	3.7748	3.543	3.0027	3.2507	3.5696	3.8909	3.9548	3.1717	2.6975	3.8413	3.644	4.2096	4.3016	3.8949	4.2481	4.0712	4.2049	4.1092	3.9438	4.0135	4.0035
pos_1052	metab_1046	metab_1046	-	-	196.133	1.7764	pos	-	-	-	-	-	-	0.0097	3.5233	3.602	3.2374	2.7124	3.3172	3.0148	3.178	3.3544	3.6277	3.3914	3.7192	3.2634	3.3131	3.7408	3.8437	3.7519	3.654	3.6557	3.611	3.6945	3.6859	3.925	3.5762	3.7087	3.4787	3.9061	3.8808	3.5114	4.0145	3.7556	3.8202	3.8154	3.6829	3.6786	3.6126
pos_1053	metab_1047	metab_1047	-	-	251.102	1.7141	pos	-	-	-	-	-	-	0.0019	4.8511	5.1534	4.9893	4.2219	4.6591	4.1979	4.7545	5.0557	5.1166	4.8451	5.1028	4.6473	4.6866	5.1323	5.1142	5.1066	4.8754	5.1135	5.2282	5.0756	5.2949	5.3236	4.7641	5.287	5.104	5.3929	5.088	5.315	5.0071	5.171	5.1221	5.1207	5.151	5.154	5.1693
pos_1054	metab_1048	metab_1048	-	-	280.153	1.7974	pos	-	-	-	-	-	-	0.0021	4.7377	4.3603	3.9282	3.3252	4.6575	3.7994	3.9907	4.4621	4.4903	3.7895	4.1095	3.9096	3.6809	4.345	4.1722	4.2403	4.8364	4.3283	4.4278	4.0414	5.1252	4.8822	3.3907	4.9931	4.5977	5.3	4.5683	4.6272	5.1168	5.0606	5.1103	5.0433	4.7798	4.7671	4.7671
pos_1055	metab_1049	metab_1049	-	-	139.03	1.7974	pos	-	-	-	-	-	-	0.0223	4.4855	3.9714	4.4386	4.181	4.4992	4.2373	4.4653	4.4455	4.143	4.3795	4.438	4.2593	4.2136	3.8322	3.8916	3.9264	4.2681	3.7981	3.7952	4.1759	4.0935	3.8563	4.3036	3.8485	3.981	3.8632	3.9235	4.3298	4.2645	4.1192	4.088	4.1515	3.9125	4.1273	4.1215
pos_1056	metab_1050	metab_1050	-	-	222.075	1.7974	pos	-	-	-	-	-	-	0.0044	4.4612	4.441	4.3756	4.3413	4.5378	4.3315	4.4825	4.5406	4.4862	4.4509	4.682	4.1713	4.3334	4.9668	4.8861	4.8757	4.4619	4.8545	5.1038	4.4189	4.3137	4.7427	4.5342	4.7544	4.4084	4.5875	4.6636	4.8429	5.0667	4.6887	4.7373	4.7116	4.7398	4.7177	4.6858
pos_1057	metab_1051	metab_1051	-	-	285.132	1.7974	pos	-	-	-	-	-	-	0.0063	3.6416	4.0348	3.6001	4.0386	3.8218	4.0284	3.7416	3.4436	3.6738	3.5714	3.3225	3.8092	3.8135	3.2212	3.4429	3.7538	3.1581	3.0563	2.9791	3.442	3.8521	3.2733	3.5454	3.5732	3.9053	4.5136	4.0922	4.1236	4.6476	4.3448	4.3724	4.404	3.8531	3.8628	3.824
pos_1058	metab_1052	metab_1052	-	-	385.159	1.6951	pos	-	-	-	-	-	-	0.0058	4.6208	4.3574	4.8009	2.8994	4.7418	2.9123	4.9564	5.0731	4.43	4.8983	4.7446	4.1228	5.2697	5.8866	5.7001	5.8361	4.4781	5.3395	5.4977	4.9739	5.5351	4.9462	4.946	5.4887	5.1176	4.9764	5.189	5.1561	5.0944	5.0745	5.0831	5.0655	5.4371	5.4735	5.5167
pos_1059	metab_1053	metab_1053	-	-	323.123	1.6751	pos	-	-	-	-	-	-	0.0102	4.6745	4.4727	4.6541	3.889	4.1472	4.2783	4.4063	4.2503	4.2843	4.1652	4.2869	3.7656	4.0805	4.3812	4.3109	4.3566	4.3637	4.238	4.4136	4.407	4.2798	4.54	4.2089	4.3112	4.7884	4.7168	4.5389	4.569	4.7804	4.4861	4.5206	4.4766	4.4083	4.417	4.4889
pos_1060	metab_1054	metab_1054	-	-	418.169	1.6751	pos	-	-	-	-	-	-	0.008	4.0073	4.0722	4.3043	2.7817	3.602	2.7945	3.9532	4.1254	4.1841	4.585	4.0191	3.9733	4.351	4.1918	4.301	4.3438	3.7081	3.0055	3.7543	4.5915	4.0179	3.0759	4.2625	3.8241	4.3732	4.0832	4.7153	4.103	4.7244	4.4925	4.5863	4.6207	4.331	4.3753	4.2967
pos_1061	metab_1055	metab_1055	-	-	191.106	1.8173	pos	-	-	-	-	-	-	0.003	4.8743	4.8707	4.5184	4.2933	4.6014	4.2282	4.5758	4.799	4.4248	4.5549	4.8457	4.296	4.3681	4.876	4.8431	4.83	4.6982	4.8847	4.8397	4.8471	4.8268	5.0108	4.5147	4.8186	4.6346	5.165	5.1497	4.9423	5.3644	5.0502	5.0982	5.0879	4.9191	4.8786	4.9034
pos_1062	metab_1056	metab_1056	-	-	183.112	1.8173	pos	-	-	-	-	-	-	0.0042	3.3218	3.3254	3.1841	3.1058	3.3287	3.08	3.0296	2.9251	3.2479	3.3589	3.3772	3.1553	3.2154	4.7503	3.7137	3.7321	2.9355	3.2645	3.5477	3.4152	3.2658	3.9499	3.2954	3.3459	3.343	4.4732	3.5668	3.3882	3.6628	3.4683	3.6678	3.4853	3.5041	3.5364	3.5082
pos_1063	metab_1057	metab_1057	-	-	212.046	1.8379	pos	-	-	-	-	-	-	0.0078	4.213	3.2504	4.0402	3.8887	4.0725	3.9981	4.3746	3.6099	3.5053	3.6132	3.7483	3.7254	3.7678	3.0455	3.2086	3.3016	3.8415	3.7131	3.0783	3.4975	3.4508	3.2177	3.5206	3.3903	3.787	3.1607	3.3029	4.3044	4.1565	3.5339	3.463	3.4253	3.4723	3.4993	3.4243
pos_1064	metab_1058	metab_1058	-	-	362.216	1.8173	pos	-	-	-	-	-	-	0.0151	3.6094	3.4493	3.17	2.96	3.0118	2.5391	3.8492	3.6897	3.4814	3.6438	3.7672	2.7694	3.3677	3.9609	3.9895	3.9496	3.515	3.6809	3.5823	3.7585	3.8286	4.2266	3.2453	3.8098	3.9567	4.4357	4.2497	3.9642	4.3354	4.1671	4.2804	4.24	4.0454	4.0051	3.9254
pos_1065	metab_1059	metab_1059	-	-	401.227	1.8173	pos	-	-	-	-	-	-	0.0067	3.412	3.7129	3.3117	2.47	2.5453	2.4828	3.0667	3.5762	3.1029	3.0617	3.504	2.5247	2.6703	4.3241	4.1211	4.1232	3.7316	3.6188	3.9306	3.7271	3.779	4.4162	2.6338	3.9332	3.6389	4.1651	3.8758	3.661	4.0611	3.9095	3.9586	3.924	3.9374	3.9456	3.9328
pos_1066	metab_1060	metab_1060	-	-	214.107	1.8173	pos	-	-	-	-	-	-	0.0062	3.9271	4.1707	3.7336	3.376	3.6648	3.0567	3.8889	3.9561	3.9279	3.9954	4.1085	3.6885	3.5778	4.1518	4.2491	4.1984	3.8439	4.1729	4.1473	4.0196	4.4038	4.4373	3.8886	4.2962	4.1111	4.7423	4.4929	4.2408	4.5959	4.5311	4.5874	4.533	4.2917	4.3382	4.2879
pos_1067	metab_1061	metab_1061	-	-	264.089	1.8173	pos	-	-	-	-	-	-	0.003	3.8625	4.4202	4.0432	3.4072	3.7782	3.4201	4.0285	4.4743	4.2848	4.4988	4.3681	3.9229	3.9802	4.7524	4.7677	4.7615	4.4163	4.5627	4.669	4.7135	4.7915	4.9948	4.484	4.7556	4.3674	4.8525	4.7057	4.5161	4.7945	4.7531	4.801	4.7835	4.7107	4.7105	4.6889
pos_1068	metab_1062	metab_1062	-	-	377.144	1.8379	pos	-	-	-	-	-	-	0.0027	5.0977	5.8909	5.3968	4.8062	4.5741	4.6367	5.28	5.543	5.1408	5.2999	5.6488	5.1604	5.368	6.0619	5.9662	5.9819	5.445	5.5213	5.9238	5.8809	5.6726	6.314	5.267	5.5908	5.6149	6.1187	5.9155	5.5786	5.8715	5.7525	5.8275	5.7925	5.8841	5.8598	5.8448
pos_1069	metab_1063	metab_1063	-	-	255.133	1.8379	pos	-	-	-	-	-	-	0.0028	4.5832	4.9409	4.3001	3.9851	4.2537	3.9148	4.6338	4.7884	4.0857	4.2032	4.7758	4.0132	4.1717	4.8465	4.7836	4.7562	4.7139	4.488	5.0493	4.5418	4.8737	5.1253	4.6008	4.7477	4.3232	5.2031	5.0359	4.4923	5.0783	4.7301	4.8365	4.8605	4.8331	4.8272	4.8459
pos_1070	metab_1064	metab_1064	-	-	290.195	1.8379	pos	-	-	-	-	-	-	0.0052	4.8105	4.4104	4.1334	3.9202	4.3115	3.9044	4.3514	4.5076	4.0534	4.2401	4.4336	4.0387	4.182	4.4941	4.4049	4.4558	4.4262	4.3334	4.3945	4.2821	4.2974	4.4059	4.1706	4.3353	4.2812	4.6079	4.8064	4.7141	5.0336	4.7669	4.7941	4.8374	4.5505	4.5389	4.4925
pos_1071	metab_1065	metab_1065	-	-	427.133	1.8379	pos	-	-	-	-	-	-	0.0052	1.4873	4.4768	3.2137	1.3391	1.4116	3.204	1.4846	1.5888	3.9116	3.2959	1.6285	4.0989	3.5791	5.2379	5.0021	5.1576	4.0814	1.5552	4.8822	4.2466	4.0578	4.9538	3.423	4.392	4.0755	5.1202	4.9368	3.4612	2.8437	4.7627	4.856	4.8713	4.7621	4.7316	4.7142
pos_1072	metab_1066	metab_1066	-	-	318.19	1.6751	pos	-	-	-	-	-	-	0.0025	4.78	5.088	4.8974	3.8176	4.5472	3.8186	4.83	5.0603	4.759	5.0232	5.2141	4.5699	4.835	5.3724	5.3894	5.3549	4.7354	5.1995	5.0462	5.2685	5.3516	5.5057	4.724	5.3437	5.1103	5.6657	5.5472	5.1476	5.5705	5.3835	5.4597	5.4376	5.3288	5.3464	5.3447
pos_1073	metab_1067	metab_1067	-	-	190.049	1.6951	pos	-	-	-	-	-	-	0.0013	4.8683	5.0421	4.7715	4.3558	4.9039	4.3022	4.8513	4.9922	4.8653	4.9005	5.131	4.6141	4.6272	5.624	5.4878	5.5136	4.9977	5.0096	5.3447	5.1534	5.0655	5.5305	4.8893	5.2252	4.8773	5.5317	5.352	4.9218	5.4124	5.191	5.2866	5.2601	5.2906	5.2736	5.2774
pos_1074	metab_1068	metab_1068	-	-	201.111	1.5945	pos	-	-	-	-	-	-	0.0045	3.5749	3.6037	3.2638	2.8115	3.2618	2.4655	3.4205	3.7259	3.6111	3.6621	3.9535	3.3051	3.1762	3.918	3.9835	3.8078	3.5659	3.4255	3.8084	3.5376	3.6904	3.7299	3.5795	3.7515	3.6983	4.1835	4.1104	3.7171	4.2357	3.9381	4.102	3.9482	3.85	3.8347	3.8467
pos_1075	metab_1069	metab_1069	-	-	415.252	1.8379	pos	-	-	-	-	-	-	0.0169	4.0079	3.6831	3.7991	4.1551	3.9907	4.1845	3.8769	3.572	3.87	3.9329	3.8217	4.1263	4.2126	3.997	3.8679	3.8897	3.7211	3.5642	4.0499	3.7703	3.654	4.4576	3.8622	3.5026	3.9036	3.265	3.7344	3.8968	3.7591	3.8455	3.7031	3.8505	3.7139	3.7587	3.7149
pos_1076	metab_1070	metab_1070	-	-	226.107	1.6153	pos	-	-	-	-	-	-	0.0052	4.2081	4.4086	4.1478	3.4796	4.1383	3.4736	4.0734	4.336	4.0678	4.1864	4.4214	3.7657	3.7782	4.5556	4.5491	4.6194	4.1779	4.4435	4.613	4.3534	4.5044	4.65	4.1988	4.4792	4.26	4.6515	4.6067	4.3922	4.7305	4.5091	4.573	4.5554	4.513	4.4564	4.4941
pos_1077	metab_1071	metab_1071	-	-	281.112	1.6153	pos	-	-	-	-	-	-	0.004	4.2197	4.4592	4.2009	3.3422	4.2061	3.1913	4.1972	4.4448	4.2113	4.2931	4.6198	4.0014	4.1439	4.6464	4.6655	4.6175	4.3619	4.6662	4.6352	4.6418	4.6999	4.2838	4.2436	4.6818	4.2822	4.6915	4.6276	4.3871	4.6881	4.4619	4.5335	4.458	4.528	4.519	4.5094
pos_1078	metab_1072	metab_1072	-	-	207.064	1.5945	pos	-	-	-	-	-	-	0.001	4.4309	4.5359	4.1723	3.6837	4.2542	3.5004	4.4566	4.4255	4.5195	4.5426	4.8192	3.9365	3.7298	4.2182	4.5746	4.3371	4.4484	3.7879	4.7392	4.0142	4.4168	3.9796	4.4467	4.5056	4.3751	4.8157	4.5383	4.4213	4.7853	4.5719	4.68	4.612	4.4953	4.4944	4.4859
pos_1079	metab_1073	metab_1073	-	-	277.154	1.859	pos	-	-	-	-	-	-	0.0084	3.0083	2.8608	2.3214	3.2458	3.232	3.2705	3.2879	4.112	2.9249	3.4381	4.6362	3.5474	3.5532	4.8094	4.5978	4.6065	3.0534	4.7662	2.6451	3.969	3.42	3.3305	2.3543	3.7152	3.2093	3.779	3.4235	3.167	4.2252	3.4004	3.4585	3.3551	3.9987	4.0358	3.9428
pos_1080	metab_1074	metab_1074	-	-	389.117	1.859	pos	-	-	-	-	-	-	0.0151	2.3972	3.5981	3.4579	2.2438	2.9056	2.2566	3.1952	3.6507	2.958	3.2417	3.8096	2.9045	3.1482	4.3232	4.0834	4.1866	3.4696	3.9847	3.9349	4.0149	4.0014	3.7125	3.1601	4.0213	3.8824	4.1392	4.2037	3.425	3.8994	3.9124	4.0093	3.7469	3.9887	3.9915	3.894
pos_1081	metab_1075	metab_1075	-	-	130.049	1.8782	pos	-	-	-	-	-	-	0.0033	4.0595	4.1715	4.1333	3.8722	4.0223	3.858	4.1966	4.2886	4.2123	4.206	4.4158	3.9243	4.0544	4.4352	4.4442	4.3874	4.0973	4.5455	4.3375	4.475	4.5437	4.7331	4.1665	4.509	4.1786	4.5334	4.3922	4.2068	4.3863	4.3187	4.3456	4.3172	4.4041	4.3958	4.3704
pos_1082	metab_1076	metab_1076	-	-	195.084	1.859	pos	-	-	-	-	-	-	0.019	3.2471	2.9563	3.0015	3.0656	2.0972	2.035	2.8109	3.0932	3.4892	3.3987	3.3772	2.9206	3.2846	3.773	3.6035	3.6434	2.6809	3.6785	3.4996	3.2036	3.1306	3.7388	3.4197	3.3383	2.2037	3.3661	3.4121	3.0538	3.3326	3.0673	3.1342	2.9228	3.4687	3.4071	3.2901
pos_1083	metab_1077	metab_1077	-	-	449.238	1.859	pos	-	-	-	-	-	-	0.0172	3.3535	4.0613	3.0128	2.6532	3.494	2.6661	3.3558	3.9265	2.8016	3.0018	3.7441	3.0598	2.7612	4.1447	3.8574	4.0897	2.8855	3.8539	4.0818	3.3466	4.1146	4.5339	2.9363	3.8693	3.9358	4.8913	4.3818	4.1359	4.5042	4.247	4.3833	4.4031	4.1743	4.266	4.0653
pos_1084	metab_1078	metab_1078	-	-	196.096	1.859	pos	-	-	-	-	-	-	0.0095	3.8837	3.7246	3.7394	3.7587	3.8641	3.6995	3.8384	3.8027	3.8046	3.98	3.9604	3.7641	3.7722	4.1114	4.1786	4.123	3.7888	3.862	4.0558	3.8335	3.8724	4.2567	3.7426	3.8693	4.2318	4.715	4.5398	4.3861	4.8089	4.4845	4.6394	4.5549	4.2949	4.3219	4.256
pos_1085	metab_1079	metab_1079	-	-	269.149	1.859	pos	-	-	-	-	-	-	0.0012	4.2424	4.3916	4.1832	3.0465	4.1452	3.2379	4.3967	4.4928	3.9988	4.2391	4.5009	3.947	4.1976	4.7859	4.6306	4.6048	4.2418	4.4598	4.6084	4.5675	4.5327	4.8513	4.132	4.6298	4.1437	4.734	4.5786	4.249	4.776	4.4305	4.5284	4.5075	4.5503	4.54	4.5359
pos_1086	metab_1080	metab_1080	-	-	335.134	1.859	pos	-	-	-	-	-	-	0.0054	3.3763	3.8981	3.6571	3.0388	3.5093	3.0516	3.6903	3.8023	3.7855	3.6541	4.332	3.0936	3.1208	4.9152	4.7706	4.7634	3.8253	4.2292	4.4872	4.4186	4.5509	5.2267	3.599	4.6567	3.2771	4.427	4.9392	3.8682	4.4713	4.3094	4.2098	4.3024	4.5158	4.4853	4.4924
pos_1088	metab_1082	metab_1082	-	-	327.14	1.8782	pos	-	-	-	-	-	-	0.0024	3.9372	3.8946	2.811	2.4986	3.7301	2.5114	3.9438	4.2649	2.6468	3.7841	4.0794	2.5533	2.5804	2.8536	3.402	3.127	2.8272	3.7076	3.0532	3.7587	3.7228	3.0198	3.5467	3.9094	3.511	3.6027	4.0577	4.0587	4.7273	4.0818	4.1722	4.0866	3.7095	3.7078	3.7301
pos_1089	metab_1083	metab_1083	-	-	239.148	0.5188	pos	-	-	-	-	-	-	0.0045	4.4507	4.4692	4.405	4.5295	4.4665	4.547	4.429	4.5578	4.587	4.6677	4.3166	4.5542	4.5886	4.7136	4.5914	4.6858	4.3978	4.6559	4.678	4.7645	4.6519	4.7339	4.6382	4.7611	4.3777	4.8722	4.7684	4.4074	4.2956	4.5148	4.6916	4.5788	4.5634	4.5422	4.5366
pos_1090	Phenol	metab_1084	HMDB0013674;HMDB0000228	C15584;C01108;C00146	95.0492	1.8973	pos	M+H-H2O, M+H	C6H6O	53.6	-	4.29144	108-95-2	0.0039	4.7439	4.856	4.7854	4.365	4.4869	4.1858	4.6065	4.855	4.7818	4.7916	5.0044	4.5297	4.6695	5.0023	4.9788	4.9379	4.7667	4.9591	5.0361	4.9086	4.9163	5.0994	4.7542	4.9608	4.7008	4.9675	4.8577	4.8107	4.6897	4.7688	4.7951	4.7385	4.8755	4.9198	4.9098
pos_1091	Indole-3-acetamide	metab_1085	HMDB0029739	C02693	157.076	1.8973	pos	M+H-H2O, M+H	C10H10N2O	53.9	-	-2.84902	-	0.0026	4.4165	4.9763	4.3497	4.0975	4.1285	4.0693	4.2507	4.6155	4.5977	4.6337	4.2671	4.3467	4.4559	5.1481	5.0672	5.0106	4.6381	4.3803	5.1	4.8019	4.7825	5.1477	4.6713	4.8758	4.6867	5.2662	5.1921	4.745	4.7836	5.0321	5.1048	5.041	4.9625	4.9929	4.9648
pos_1092	metab_1086	metab_1086	-	-	152.07	1.8973	pos	-	-	-	-	-	-	0.0077	4.3721	4.535	4.3601	4.1287	4.2443	4.0716	4.3273	4.5311	4.5153	4.528	4.6808	4.1866	4.3077	4.6273	4.6714	4.5686	4.4617	4.5203	4.6641	4.5785	4.6175	4.7052	4.4561	4.6879	4.3429	4.6773	4.8103	4.609	4.8605	4.643	4.777	4.6337	4.6166	4.6341	4.5879
pos_1093	metab_1087	metab_1087	-	-	246.169	1.8973	pos	-	-	-	-	-	-	0.01	4.1586	4.298	3.7882	3.34	4.0601	3.4811	4.0917	4.2919	4.2086	4.4074	4.5736	3.6806	3.8557	4.5572	4.538	4.5589	4.0453	4.4647	4.3632	4.4304	4.8599	4.9599	4.2388	4.5705	4.152	4.691	4.9618	4.4261	4.7459	4.6488	4.6726	4.7008	4.708	4.6477	4.6685
pos_1094	metab_1088	metab_1088	-	-	267.121	1.8973	pos	-	-	-	-	-	-	0.0052	4.3089	4.4207	4.208	3.9709	3.9991	4.0524	4.1228	4.3212	4.264	4.2404	4.4165	4.1159	4.2263	4.4506	4.5354	4.4496	4.2104	4.3485	4.4667	4.3836	4.2826	4.4493	4.1568	4.4137	4.3478	4.6285	4.6716	4.4548	4.6042	4.608	4.6627	4.578	4.5604	4.5161	4.4983
pos_1095	metab_1089	metab_1089	-	-	463.096	1.8973	pos	-	-	-	-	-	-	0.0082	5.2497	5.103	5.2355	4.7859	4.9707	4.5056	5.1225	5.175	5.2579	5.2556	5.2611	5.0328	5.2495	5.0889	5.0841	5.1961	5.2258	5.0642	5.0731	5.1436	5.0899	4.8682	5.1863	5.0941	5.1566	4.9173	5.0087	5.216	4.9113	5.1601	5.0785	5.0301	5.2107	5.1716	5.2163
pos_1096	metab_1090	metab_1090	-	-	221.091	1.8973	pos	-	-	-	-	-	-	0.0015	4.6474	5.1549	4.6093	4.0901	4.3413	4.0504	4.5511	4.9238	4.7637	4.8144	4.6924	4.4302	4.5338	5.3335	5.2186	5.2097	4.843	4.7837	5.2752	4.9987	4.9823	5.2868	4.8731	5.0699	4.9144	5.4633	5.3624	4.9462	5.108	5.2223	5.2925	5.2323	5.163	5.1758	5.1586
pos_1097	metab_1091	metab_1091	-	-	247.085	1.9161	pos	-	-	-	-	-	-	0.0088	4.4918	4.9084	4.5153	2.825	4.274	2.8379	4.5209	4.808	4.1917	4.4676	4.5107	3.7288	3.9061	4.8237	4.7935	4.7732	4.7468	5.2375	4.951	5.2573	4.7618	5.3844	4.3216	4.9432	4.774	5.1461	4.736	4.8179	4.7601	4.8135	4.7959	4.7267	4.8261	4.8713	4.9443
pos_1098	metab_1092	metab_1092	-	-	175.148	1.9161	pos	-	-	-	-	-	-	0.0072	3.0455	4.1274	3.7899	2.3133	3.6947	2.3261	3.8091	4.156	3.2087	3.5806	4.2856	3.4055	4.0361	4.7338	4.5156	4.5484	3.5783	4.3407	4.3151	4.5866	4.1487	4.764	3.3294	4.3575	4.3214	5.0726	4.4935	4.4812	4.4418	4.5598	4.6089	4.5248	4.4751	4.5373	4.5657
pos_1099	metab_1093	metab_1093	-	-	148.075	1.9161	pos	-	-	-	-	-	-	0.0064	4.0192	4.088	3.9571	3.818	3.8497	3.6615	4.1545	4.0368	3.8178	3.9651	4.1214	3.7404	3.9153	4.3497	4.2413	4.2856	4.2426	3.987	4.3349	4.0709	4.1315	3.9306	4.1752	4.1845	3.8909	4.0587	4.1095	4.2066	4.0703	4.1092	4.0884	3.986	4.1195	4.0832	4.1564
pos_1100	metab_1094	metab_1094	-	-	263.081	1.9161	pos	-	-	-	-	-	-	0.0034	3.9679	4.6238	4.0595	3.2501	3.7529	3.0993	3.9464	4.4129	3.8415	3.9412	4.0628	3.564	3.5695	4.6438	4.6211	4.4873	4.261	4.8265	4.7632	4.8344	4.4417	5.2824	3.983	4.7278	4.2918	5.0408	4.6959	4.4213	4.6047	4.4982	4.6472	4.5035	4.6075	4.6302	4.6189
pos_1101	metab_1095	metab_1095	-	-	323.073	1.9161	pos	-	-	-	-	-	-	0.0091	3.5539	3.7414	3.7167	2.6151	3.739	2.6279	3.7666	3.7383	3.4036	3.5639	3.627	3.1241	3.9163	4.3349	4.1387	4.3463	3.387	4.1057	3.8893	4.2213	3.9753	4.5788	3.3147	4.0052	4.3958	4.4819	4.2665	4.0384	4.1809	4.1485	4.2297	4.1706	4.1242	4.1387	4.1858
pos_1102	metab_1096	metab_1096	-	-	149.059	1.9161	pos	-	-	-	-	-	-	0.0031	4.4802	4.6709	4.2213	3.772	4.0377	3.6447	4.4164	4.5891	4.4848	4.4803	4.7103	4.0845	4.137	4.9114	4.816	4.8442	4.3715	4.5969	4.8571	4.5314	4.7228	4.9096	4.5626	4.798	4.6494	4.9716	4.9763	4.57	4.9959	4.807	4.8772	4.8094	4.7881	4.7651	4.8061
pos_1103	Benzoic acid	metab_1097	HMDB0013677;HMDB0013676;HMDB0001870;HMDB0004461;HMDB0006115	C00261;C00539;C09815;C00180	105.033	1.8973	pos	M+H-H2O, M+H	C7H6O2	61	-	-0.492889	65-85-0	0.0022	6.3987	6.5085	6.4376	5.9518	6.1183	5.7336	6.2336	6.5117	6.431	6.4305	6.647	6.1756	6.2948	6.6416	6.6208	6.5889	6.4245	6.618	6.6859	6.5538	6.5659	6.7519	6.3884	6.6302	6.342	6.6132	6.5019	6.4612	6.3194	6.3906	6.431	6.3838	6.5308	6.566	6.5562
pos_1104	metab_1098	metab_1098	-	-	134.06	1.9161	pos	-	-	-	-	-	-	0.0015	5.2555	5.5941	5.248	4.7599	5.1074	4.6292	5.3	5.4818	5.1146	5.2523	5.3316	4.9262	5.0003	5.5696	5.5251	5.5213	5.4273	5.745	5.6387	5.7851	5.4879	5.9839	5.2328	5.6339	5.5213	5.841	5.5668	5.5495	5.5812	5.5716	5.6168	5.5345	5.5639	5.5737	5.5868
pos_1105	metab_1099	metab_1099	-	-	301.084	1.9369	pos	-	-	-	-	-	-	0.0043	3.8066	4.6865	3.5535	3.1114	3.8348	2.3228	3.7363	4.575	4.5583	4.5419	4.6076	4.2379	4.0925	4.8954	4.8191	4.8585	4.4298	4.6305	4.8101	4.7507	4.6917	5.066	4.5727	4.7007	4.078	4.7924	4.6552	4.366	4.7823	4.6074	4.6197	4.6032	4.6863	4.7131	4.6959
pos_1106	metab_1100	metab_1100	-	-	212.118	1.9369	pos	-	-	-	-	-	-	0.0102	3.9035	3.3503	3.7623	4.1106	3.998	4.0857	3.9848	3.7443	3.9854	3.952	3.7229	4.0321	4.059	3.8667	3.5449	3.76	3.782	4.0582	3.9791	3.9049	3.7416	3.6723	3.773	3.7756	3.9007	4.0802	3.5479	3.9285	4.1541	4.0841	4.1077	3.9988	3.9548	3.8679	3.9362
pos_1107	metab_1101	metab_1101	-	-	576.127	1.8973	pos	-	-	-	-	-	-	0.0023	6.1062	5.9719	6.116	5.6907	5.8537	5.4441	5.992	6.0318	6.1222	6.1402	6.1673	5.9274	6.1282	6.0057	5.965	6.057	6.0543	5.9359	6.0275	5.9981	5.9896	5.7855	6.0778	5.9751	6.0212	5.7995	5.9013	6.0779	5.787	5.9834	5.9204	5.9015	6.0586	6.0624	6.0316
pos_1108	metab_1102	metab_1102	-	-	347.12	0.5188	pos	-	-	-	-	-	-	0.008	4.2914	4.4799	4.4943	4.3445	3.6897	3.5818	3.9279	4.5255	4.1761	4.2249	4.4402	4.1639	4.7846	5.3489	5.0339	5.2871	4.2474	3.6446	4.5106	4.5048	4.3497	5.035	4.1099	4.3071	4.56	4.8397	4.5373	4.3307	4.8174	4.6361	4.7051	4.7396	4.8495	4.8024	4.7427
pos_1109	metab_1103	metab_1103	-	-	304.131	1.9369	pos	-	-	-	-	-	-	0.0173	4.0418	4.2208	3.9457	3.7209	4.1054	3.5665	4.1251	4.0157	3.8121	3.8667	3.6165	3.7875	3.8971	4.3873	3.8665	4.2945	4.0247	3.994	3.6527	4.085	3.8198	3.9928	3.8971	3.8573	4.1158	3.6838	3.5796	4.0157	4.0162	4.1055	3.8841	3.9368	3.9896	3.8992	4.0247
pos_1110	Glucosylgalactosyl hydroxylysine	metab_1104	HMDB0000585	-	487.212	0.5188	pos	M+H, M+Na	C18H34N2O13	-	53.7	-2.78437	32448-35-4	0.0026	4.786	5.0926	4.9109	4.7901	4.5595	4.3977	4.8481	4.994	5.0288	4.9965	4.9136	4.826	4.5261	4.9487	4.955	5.0047	5.1477	5.2561	5.1087	5.235	5.2978	5.0758	5.0972	5.2178	4.9661	4.8366	4.7363	4.6886	4.6323	4.7567	4.7881	4.675	4.9784	5.0079	5.0107
pos_1111	metab_1105	metab_1105	-	-	188.175	0.5188	pos	-	-	-	-	-	-	0.0014	5.0316	5.6332	5.2155	4.9504	4.8882	4.8811	5.2086	5.2832	5.482	5.3937	5.3063	5.3527	5.2417	5.7406	5.5998	5.6959	5.2499	5.3105	5.5468	5.6255	5.5301	6.1165	5.3961	5.5423	5.8257	5.9257	5.8391	5.3354	5.4343	5.738	5.7614	5.6946	5.5934	5.5996	5.6003
pos_1112	metab_1106	metab_1106	-	-	207.137	1.9563	pos	-	-	-	-	-	-	0.0009	4.2924	4.4768	4.3371	3.8793	4.2436	3.8621	4.4228	4.5142	4.3393	4.4252	4.6688	4.2101	4.3944	4.8918	4.8277	4.8508	4.3034	4.6359	4.6606	4.5654	4.649	4.8816	4.3876	4.6592	4.8339	5.2229	5.1347	4.8413	5.1633	4.9801	5.0911	5.0306	4.8292	4.8295	4.8377
pos_1113	metab_1107	metab_1107	-	-	464.211	1.9563	pos	-	-	-	-	-	-	0.0123	3.3365	4.9566	2.7203	3.0697	2.6648	3.2939	2.7404	4.6779	3.0928	3.6562	3.8367	3.3318	2.6713	2.9445	2.9263	3.4159	2.7779	4.5303	3.0516	3.9845	3.7113	2.8834	3.1674	4.0644	4.178	4.7651	4.4923	5.3592	4.7841	4.8476	4.7489	4.8959	4.2946	4.4248	4.4278
pos_1114	metab_1108	metab_1108	-	-	248.094	1.9563	pos	-	-	-	-	-	-	0.0061	2.8302	3.9623	2.5423	3.0976	2.3324	3.0599	3.1227	3.7646	4.1682	4.1223	4.2156	3.817	3.9087	4.3022	4.2282	4.2389	3.3957	3.7543	4.0753	3.8867	3.845	4.7346	3.8426	3.7445	3.7992	4.538	4.4262	3.7854	4.3896	4.2523	4.3394	4.3891	4.1562	4.1755	4.2182
pos_1115	metab_1109	metab_1109	-	-	417.116	1.9563	pos	-	-	-	-	-	-	0.0057	3.7751	4.5159	4.1099	3.0912	3.6736	3.104	4.4037	4.2943	3.5244	4.2134	4.5258	4.044	4.2651	4.4485	4.383	4.3937	4.2883	4.5763	4.0663	4.7718	4.5009	3.7943	4.3167	4.467	4.1043	4.3081	4.1728	4.1546	4.2016	4.0929	4.128	4.0347	4.3149	4.3316	4.2996
pos_1116	metab_1110	metab_1110	-	-	164.07	1.9972	pos	-	-	-	-	-	-	0.0021	5.7487	5.7375	5.9657	5.1561	5.6935	5.133	5.5751	5.9463	5.5415	5.7713	5.8949	5.3767	5.4541	6.1873	6.123	6.1153	5.7847	6.001	6.0896	5.7258	6.0273	6.2328	5.6998	6.0471	5.4202	5.8248	5.8026	5.5145	5.3332	5.4801	5.5345	5.5182	5.9058	5.9259	5.939
pos_1117	metab_1111	metab_1111	-	-	193.085	1.9563	pos	-	-	-	-	-	-	0.0078	3.464	3.8282	3.3479	2.2343	3.3886	2.6189	3.5406	3.7764	4.108	4.2533	4.4165	3.8612	3.9373	4.2118	4.3432	4.2653	3.8688	4.1538	3.9675	4.0449	4.1122	3.7743	3.7813	4.0997	4.1606	4.9075	4.6204	4.3665	4.8817	4.6691	4.7439	4.7067	4.3282	4.398	4.409
pos_1118	metab_1112	metab_1112	-	-	389.142	1.977	pos	-	-	-	-	-	-	0.0047	3.928	4.1879	3.7946	3.2768	3.9375	3.0552	4.1325	4.1513	4.1105	3.9764	4.4247	3.7942	3.9909	4.243	4.2167	4.0443	4.1842	4.148	4.2966	4.3673	4.145	4.3353	3.7118	4.1885	4.5617	4.8677	4.7992	4.5573	4.9536	4.6812	4.7974	4.7376	4.419	4.3802	4.4149
pos_1119	metab_1113	metab_1113	-	-	419.075	1.977	pos	-	-	-	-	-	-	0.0051	5.0972	4.7752	5.2307	4.6436	5.2056	4.6832	5.0266	5.0059	4.9463	5.1157	4.8677	4.8716	4.9182	4.8107	4.8649	4.921	5.0354	4.8646	4.891	4.8208	4.9543	4.1099	4.9837	4.8179	4.8361	4.5864	4.7072	4.7814	4.2273	4.773	4.6772	4.7713	4.9168	4.8977	4.9497
pos_1120	metab_1114	metab_1114	-	-	214.062	1.9972	pos	-	-	-	-	-	-	0.0056	5.1435	4.974	5.0913	5.2105	5.0857	5.2047	5.1323	4.9475	5.1338	5.1127	4.8974	5.1803	5.111	4.7064	4.8394	4.7672	5.1003	4.8824	4.8077	5.0734	4.9818	4.808	5.0472	4.8449	5.1719	4.7833	4.9104	5.1471	5.0402	5.0671	5.0338	5.0578	5.0113	4.962	5.0081
pos_1121	metab_1115	metab_1115	-	-	404.154	1.9563	pos	-	-	-	-	-	-	0.0044	4.1802	5.1598	3.6006	4.1621	3.8503	4.2231	3.9992	4.8573	4.7565	4.908	5.0961	4.5934	4.5166	4.8694	4.9441	4.8712	4.4647	5.057	4.4298	4.6993	4.8061	3.8319	4.3632	4.7983	4.7296	5.627	5.2581	5.5217	5.5735	5.399	5.4322	5.434	5.0654	5.1073	5.1156
pos_1122	metab_1116	metab_1116	-	-	334.139	1.977	pos	-	-	-	-	-	-	0.0171	3.0813	3.6516	3.6186	2.2998	2.8867	3.092	3.3145	3.9674	3.7935	3.5347	3.9421	2.3545	2.3816	3.709	3.2367	3.7159	3.5541	3.6824	2.6019	3.6228	3.676	3.8449	2.7496	3.1946	4.7014	3.9208	4.1099	3.653	3.9633	3.9618	4.182	3.5325	3.9677	3.798	3.8289
pos_1123	metab_1117	metab_1117	-	-	279.133	1.9972	pos	-	-	-	-	-	-	0.0022	4.971	5.4419	5.0606	4.2594	5.1286	4.1476	5.1539	5.3555	5.0415	4.9966	5.2947	4.7162	4.8647	5.4649	5.367	5.3913	5.1954	5.0698	5.4226	5.2777	5.2356	5.5333	5.1468	5.2729	5.1285	5.5763	5.5464	5.1268	5.5938	5.3949	5.4805	5.4708	5.414	5.3839	5.4027
pos_1124	metab_1118	metab_1118	-	-	212.127	1.9972	pos	-	-	-	-	-	-	0.0007	3.9027	4.2071	3.9217	3.5519	4.2405	3.5715	3.985	4.1201	3.9949	4.1883	4.4382	3.9266	3.9274	4.4717	4.446	4.3903	4.1522	4.3521	4.2646	4.3732	4.3217	4.4509	4.0112	4.2895	3.9661	4.3452	4.2684	3.9758	4.4965	4.1923	4.2701	4.266	4.3171	4.3083	4.3133
pos_1125	metab_1119	metab_1119	-	-	109.101	1.9972	pos	-	-	-	-	-	-	0.0046	4.0044	4.2836	3.9892	3.7213	4.0333	3.7012	4.0557	4.1982	4.1015	4.0531	4.3596	3.8753	3.9487	4.3957	4.3558	4.3512	4.1724	4.1419	4.2838	4.218	4.2854	4.383	4.0741	4.2665	4.1872	4.6196	4.4944	4.2269	4.5845	4.3845	4.4626	4.4479	4.3674	4.3177	4.337
pos_1126	metab_1120	metab_1120	-	-	385.123	1.9972	pos	-	-	-	-	-	-	0.0282	4.5555	3.642	5.2591	2.3746	4.4433	2.9887	4.6011	3.3025	2.7253	2.6361	3.761	2.4475	2.4564	4.1426	3.8141	3.8022	3.6056	3.748	3.4017	3.1639	3.5073	3.3964	2.5383	3.1262	3.7985	4.0981	4.5033	3.4644	4.0299	3.7441	3.9048	3.9236	3.8142	3.8168	3.6116
pos_1127	metab_1121	metab_1121	-	-	284.11	2.0367	pos	-	-	-	-	-	-	0.0067	3.9306	4.0781	3.6829	3.8394	4.1243	3.2688	3.9754	4.1134	4.193	4.1714	4.5137	3.8167	3.7388	4.1182	4.2093	4.2146	4.2021	4.2406	4.2637	4.4519	4.5258	4.3606	4.1914	4.4172	4.0469	4.6278	4.6151	4.2396	4.6538	4.4733	4.5491	4.5512	4.3353	4.3092	4.3574
pos_1128	metab_1122	metab_1122	-	-	253.143	1.9972	pos	-	-	-	-	-	-	0.0035	4.063	4.4036	3.8073	3.4942	3.9055	3.4387	4.1092	4.231	4.3474	4.2704	4.6081	3.9499	4.0177	4.4766	4.4846	4.4641	4.0887	4.086	4.3128	4.1642	4.3011	4.4154	4.0376	4.3016	4.2287	4.8312	4.6998	4.3882	4.825	4.5851	4.6728	4.6487	4.4386	4.4696	4.4815
pos_1129	metab_1123	metab_1123	-	-	356.096	2.0171	pos	-	-	-	-	-	-	0.0042	5.0148	5.0015	5.3646	4.2759	4.9	4.2478	5.1554	5.3811	4.9965	4.8019	5.5492	4.5059	4.4934	5.335	5.2754	5.2482	5.2112	5.5578	5.9028	5.1132	5.687	3.8397	4.8287	5.769	4.7599	5.3745	5.2825	4.6468	4.6516	4.8433	4.9466	4.9768	5.294	5.3182	5.2873
pos_1130	metab_1124	metab_1124	-	-	308.151	2.0171	pos	-	-	-	-	-	-	0.0019	2.4295	3.8481	2.4067	2.276	2.3513	2.2888	2.4267	3.8386	3.5576	3.4764	3.9624	2.3306	2.7002	4.7588	4.5347	4.6751	2.9704	3.7712	4.3177	3.4669	4.2854	4.6403	3.5599	4.0606	2.6664	4.8448	4.3586	2.7879	4.2614	4.2005	4.3471	4.3946	4.4483	4.4542	4.4562
pos_1131	metab_1125	metab_1125	-	-	250.11	2.0171	pos	-	-	-	-	-	-	0.0064	3.486	3.7793	2.597	2.4661	2.8613	2.4789	2.617	3.9819	4.2496	4.0981	4.3448	3.7911	3.8757	4.5344	4.5629	4.5564	3.2841	3.6566	4.173	3.6495	3.8898	4.2032	3.6582	3.8242	3.4775	4.7238	4.601	3.6719	4.4903	4.2121	4.4191	4.3987	4.3608	4.4076	4.3557
pos_1132	metab_1126	metab_1126	-	-	307.185	2.0171	pos	-	-	-	-	-	-	0.0044	4.3156	4.5582	4.2158	3.9634	4.3698	3.1576	4.3446	4.3703	4.6073	4.5892	4.6326	4.2995	4.2565	4.5566	4.5165	4.483	4.5515	4.4617	4.6416	4.8293	4.9564	4.703	4.4483	4.8235	4.1012	4.7811	4.5627	4.3238	4.5212	4.5342	4.5795	4.5953	4.6199	4.5758	4.6299
pos_1133	metab_1127	metab_1127	-	-	181.133	2.0171	pos	-	-	-	-	-	-	0.0121	3.6031	3.6132	3.5582	3.78	3.7538	3.8836	3.6287	3.5525	3.6291	3.6603	3.8067	3.8793	3.8701	4.2508	3.9774	4.178	3.5108	3.721	3.6174	3.6058	3.7003	3.6252	3.52	3.6265	3.6279	3.9208	3.7491	3.6011	3.6958	3.7505	3.7309	3.8566	3.9221	3.7945	3.8709
pos_1134	metab_1128	metab_1128	-	-	396.185	2.0367	pos	-	-	-	-	-	-	0.0052	4.2749	4.6372	4.1716	3.751	4.0048	3.6067	4.5284	4.6084	4.8963	4.159	5.1285	4.0762	4.0894	4.8946	4.839	4.8022	4.4089	4.5655	5.0374	4.6135	4.7513	4.5363	4.0383	4.8491	4.776	5.2645	5.3785	4.771	5.2269	5.0081	5.066	5.0664	4.9044	4.8668	4.856
pos_1135	Trigoforin	metab_1129	HMDB0029495	-	189.09	2.0367	pos	M+H-H2O, M+H	C12H12O2	57.3	-	-4.0899	14002-93-8	0.0033	4.3411	4.7513	4.0529	3.6819	4.1199	3.5013	4.0812	4.5397	4.1018	4.0532	4.5076	3.8537	3.8664	4.2958	4.3881	4.2607	4.0795	4.2627	4.4302	4.1956	4.3636	4.4863	4.1227	4.3792	4.0585	4.8606	4.6494	4.6333	4.8951	4.6163	4.6924	4.6746	4.5011	4.5025	4.4668
pos_1136	metab_1130	metab_1130	-	-	309.18	2.0367	pos	-	-	-	-	-	-	0.0059	3.9438	4.1118	3.6868	2.9773	3.842	2.9902	3.9614	4.165	4.2183	4.2315	4.1749	3.5365	3.3794	4.0083	4.1815	4.0969	3.9668	3.9049	4.2042	3.9428	3.9667	4.0507	4.1395	4.08	3.9166	4.2423	4.2459	4.0121	4.3491	4.2078	4.2634	4.2771	4.0889	4.1555	4.1242
pos_1137	metab_1131	metab_1131	-	-	450.232	2.0367	pos	-	-	-	-	-	-	0.0045	4.1926	4.7399	4.3343	2.8069	3.6648	2.8197	4.435	4.6429	4.4419	4.4108	4.569	3.3428	3.7296	4.7506	4.7079	4.6832	4.6589	4.4102	4.6389	4.7619	4.7313	4.7139	4.5618	4.7484	4.9144	5.354	5.2	5.0591	5.2327	5.2217	5.2587	5.254	4.9253	4.9886	4.9607
pos_1138	metab_1132	metab_1132	-	-	273.168	2.0367	pos	-	-	-	-	-	-	0.0038	3.5787	4.321	3.6654	2.9732	3.6755	2.6527	3.7344	4.1153	3.9072	4.0531	4.4531	3.4342	3.4912	4.4135	4.3701	4.3162	3.8738	4.0644	4.2734	4.0614	4.219	4.168	3.9316	4.2477	4.0864	4.693	4.5814	4.2226	4.7456	4.4444	4.5689	4.5182	4.3122	4.2724	4.3116
pos_1139	metab_1133	metab_1133	-	-	322.139	2.0367	pos	-	-	-	-	-	-	0.0091	3.3351	4.0123	2.9196	2.4887	2.9844	2.5015	2.8461	3.4987	3.0748	3.255	4.0941	2.5434	2.7912	3.9934	4.1591	3.8503	3.2101	3.854	3.8066	3.9596	3.9519	4.2318	3.6167	3.9685	3.5313	3.6408	3.5975	2.7487	4.1883	3.546	3.4159	3.5203	3.8335	3.7536	3.7618
pos_1140	metab_1134	metab_1134	-	-	246.111	2.0367	pos	-	-	-	-	-	-	0.0086	3.8007	4.0964	3.6312	2.9905	3.6656	3.062	3.886	4.06	4.0927	4.1086	4.2414	3.3666	3.2379	3.9867	4.2013	3.9872	3.9204	3.8077	4.2568	3.7919	4.0761	4.0271	4.0475	4.0596	3.6881	4.3566	4.0969	3.6102	4.2653	4.0524	4.1155	4.0612	4.0935	4.1188	4.0302
pos_1141	metab_1135	metab_1135	-	-	431.096	2.0582	pos	-	-	-	-	-	-	0.0027	6.1662	6.4272	6.0553	5.403	5.9897	5.4131	6.0171	6.3087	5.9676	6.2366	6.1723	5.8208	5.8994	6.4393	6.4607	6.3761	6.2199	6.2608	6.5594	6.3798	6.5409	4.7873	6.4048	6.5393	6.1547	6.6613	6.4993	6.4002	6.5888	6.4618	6.5226	6.4831	6.3878	6.4144	6.3707
pos_1142	metab_1136	metab_1136	-	-	197.117	2.0367	pos	-	-	-	-	-	-	0.0009	4.3899	4.6786	4.3133	4.0915	4.2983	4.0032	4.3825	4.5791	4.5469	4.6148	4.7076	4.2897	4.2334	4.6451	4.7624	4.65	4.4248	4.3668	4.6627	4.4583	4.4686	4.5757	4.503	4.5734	4.8994	5.3935	5.2771	5.0403	5.427	5.1689	5.2374	5.2482	4.8875	4.8912	4.8981
pos_1143	Inodxyl glucuronide	metab_1137	-	-	310.091	2.0582	pos	M+H-2H2O, M+H	C14H15NO7	65.5	-	-4.65386	-	0.0046	4.5396	4.3398	4.8353	3.7958	4.3416	4.1021	4.7901	4.3792	4.2303	4.1768	4.477	4.0048	3.854	4.0486	4.1757	4.0684	4.3877	4.5418	4.3916	4.7112	4.3187	3.4826	4.2776	4.405	4.4917	4.5786	4.4549	4.6102	4.5465	4.4762	4.5592	4.4696	4.3479	4.3782	4.324
pos_1144	metab_1138	metab_1138	-	-	167.106	2.0783	pos	-	-	-	-	-	-	0.0029	4.3238	4.5113	4.2313	4.0919	4.1333	4.0818	4.3737	4.4445	4.603	4.2569	4.8076	4.1727	4.2298	4.6322	4.6028	4.6059	4.3582	4.3903	4.6647	4.4467	4.4849	4.4466	4.2065	4.5565	4.5127	4.9587	5.0211	4.5282	4.9573	4.7304	4.8026	4.7803	4.624	4.6424	4.628
pos_1145	metab_1139	metab_1139	-	-	318.226	2.0582	pos	-	-	-	-	-	-	0.006	3.8269	4.3402	3.5985	3.5552	3.8881	3.3917	3.8317	4.3517	3.7727	3.9184	3.8851	3.6997	3.7438	4.2827	4.145	4.2528	3.6763	4.2723	4.049	3.8728	4.1456	4.2465	3.8277	4.0538	4.242	4.5052	4.3821	4.3603	4.4796	4.3843	4.4595	4.4512	4.2205	4.2732	4.2265
pos_1146	metab_1140	metab_1140	-	-	434.104	2.0582	pos	-	-	-	-	-	-	0.0069	4.356	4.1088	4.3135	3.184	4.0631	3.1968	4.0686	3.8462	3.3746	3.7636	3.6899	3.3396	3.266	4.0438	4.0398	3.9008	4.1336	3.7466	4.1136	4.0367	4.2653	3.4784	3.9861	4.0912	3.9887	4.3174	4.1153	4.1099	4.2572	4.0499	4.1157	4.0787	3.974	4.0196	4.0178
pos_1147	metab_1141	metab_1141	-	-	268.117	2.0582	pos	-	-	-	-	-	-	0.008	3.9165	4.1233	3.7701	3.8546	3.8857	3.8042	3.9091	4.0214	3.9701	3.9186	4.0111	3.7689	3.7606	3.9903	3.9853	4.0522	3.824	3.7177	4.1607	3.9697	3.9143	4.0772	3.9985	3.9799	3.9609	4.2422	4.1376	3.8859	4.3031	4.1579	4.1887	4.1933	4.0459	4.0806	4.1365
pos_1148	metab_1142	metab_1142	-	-	335.126	2.0582	pos	-	-	-	-	-	-	0.0078	2.4496	3.4322	2.7757	2.2962	2.6446	2.309	2.7083	3.2185	3.1387	3.2405	2.7629	2.6213	2.3779	3.8137	3.7864	3.61	3.0647	3.3778	3.8096	3.8121	3.6587	4.5087	3.1239	3.7749	2.4782	3.5314	3.3273	2.7056	3.1282	3.2727	3.4551	3.1625	3.5445	3.5414	3.6081
pos_1149	metab_1143	metab_1143	-	-	213.111	2.0582	pos	-	-	-	-	-	-	0.004	3.7214	3.8538	3.5335	2.9598	3.7708	3.0178	3.6909	3.8334	3.8736	3.7993	4.179	3.6378	3.7135	4.3685	4.2265	4.3233	3.5898	3.7889	3.9476	3.905	3.9672	4.151	3.6714	3.8852	4.226	4.6274	4.5529	4.2056	4.6484	4.4374	4.5278	4.4624	4.2133	4.1966	4.2433
pos_1150	metab_1144	metab_1144	-	-	256.117	2.0582	pos	-	-	-	-	-	-	0.0115	3.244	3.9965	3.4107	2.8373	2.9128	2.8501	3.3186	3.8206	3.4268	3.5072	3.9721	2.9619	3.1583	4.2512	4.1106	4.1362	3.7745	3.9548	3.9969	4.1782	4.1097	4.2146	3.3864	4.1068	3.5748	4.455	4.2145	3.8268	4.3427	4.1599	4.2418	4.2212	4.1211	4.1047	4.0097
pos_1151	metab_1145	metab_1145	-	-	351.193	2.0582	pos	-	-	-	-	-	-	0.0031	4.0523	4.32	3.8166	3.4154	3.7661	3.3238	3.7778	4.3898	4.1091	4.215	4.1502	3.828	3.8704	4.6128	4.42	4.5399	4.1075	3.9646	4.448	4.1387	4.4965	4.4302	4.218	4.4767	3.8944	4.8828	4.6114	4.2	4.6621	4.5471	4.7389	4.7135	4.5402	4.5203	4.5257
pos_1152	metab_1146	metab_1146	-	-	191.142	2.0783	pos	-	-	-	-	-	-	0.0057	3.9229	4.0108	3.902	3.8731	3.9107	3.8929	3.8821	4.1459	3.9098	4.0022	4.2655	3.8538	3.9946	4.532	4.392	4.4237	3.9339	3.905	4.0501	4.0401	4.1539	4.3768	3.8129	4.1831	4.3627	4.8443	4.702	4.4109	4.6826	4.5477	4.6361	4.5945	4.437	4.368	4.3913
pos_1153	metab_1147	metab_1147	-	-	205.049	2.0783	pos	-	-	-	-	-	-	0.01	4.4515	4.1519	4.3202	4.3435	4.4056	4.3092	4.3608	4.1808	4.2761	4.2551	4.2891	4.3144	4.3393	3.8795	4.0492	4.121	4.1551	3.8841	4.1077	4.0378	4.0222	3.8995	4.2915	3.9737	4.1602	4.1817	4.1715	4.2897	4.3214	4.3113	4.2395	4.2433	4.0565	4.1405	4.157
pos_1154	metab_1148	metab_1148	-	-	302.114	2.0783	pos	-	-	-	-	-	-	0.0064	4.1513	4.0477	3.6827	4.382	4.5352	3.3629	4.2939	4.5652	3.7481	4.0321	4.7681	4.0063	3.5294	4.3144	4.1574	4.6451	4.241	4.7454	4.3665	4.2967	4.412	4.4677	4.5874	4.4837	4.0234	4.6564	4.6705	4.3259	4.6271	4.6688	4.6946	4.7253	4.3434	4.3261	4.3942
pos_1155	metab_1149	metab_1149	-	-	202.107	1.9972	pos	-	-	-	-	-	-	0.0013	5.0408	5.1409	4.9834	4.6406	4.974	4.1603	5.0621	5.0975	5.2684	5.2714	5.4264	4.9517	4.9127	5.1193	5.3065	5.1458	5.27	5.2389	5.3151	5.5595	5.7074	5.456	5.0981	5.5948	4.7126	5.3991	5.2568	5.0023	5.1761	5.1243	5.1796	5.1831	5.2968	5.2785	5.2876
pos_1156	metab_1150	metab_1150	-	-	255.144	0.4983	pos	-	-	-	-	-	-	0.0075	3.5834	3.635	3.6935	3.6734	3.1921	3.0126	3.4076	3.6527	3.5514	3.7656	3.2581	3.5827	3.7755	3.9681	3.8675	3.8709	3.6977	3.6878	3.6048	3.908	3.7687	3.7929	3.8949	3.7148	3.2349	3.9304	3.8454	3.2524	3.5774	3.4294	3.6448	3.5449	3.8279	3.7789	3.7689
pos_1157	metab_1151	metab_1151	-	-	251.138	2.118	pos	-	-	-	-	-	-	0.0057	4.084	4.4783	3.972	3.1443	4.0861	2.4749	4.2326	4.4317	3.8868	4.0971	4.4053	3.9808	3.914	4.519	4.4023	4.452	4.3123	4.369	4.4411	4.3934	4.565	4.3537	4.2502	4.4388	3.9678	4.5871	4.6199	4.1134	4.7089	4.3303	4.4841	4.4497	4.4463	4.3958	4.4438
pos_1158	metab_1152	metab_1152	-	-	332.205	2.0983	pos	-	-	-	-	-	-	0.002	4.5109	4.7352	4.2576	3.9544	4.1629	3.3474	4.4448	4.6439	4.5936	4.68	4.899	4.2368	4.3041	5.1441	5.1096	5.069	4.4358	4.7568	4.856	4.6732	4.7396	4.9828	4.4416	4.8329	4.79	5.2576	5.2252	4.7915	5.2496	5.051	5.1471	5.1088	4.9629	4.985	4.9595
pos_1159	metab_1153	metab_1153	-	-	267.133	2.0983	pos	-	-	-	-	-	-	0.0051	3.7811	4.4864	3.6459	2.62	3.5736	2.1331	3.964	4.1914	3.722	3.6746	4.079	3.1159	2.9146	4.5676	4.4175	4.5177	3.8547	4.0558	4.5861	4.384	4.4691	4.5972	3.8679	4.6259	3.8274	4.702	4.4583	3.915	4.6386	4.1949	4.4652	4.3117	4.3189	4.3378	4.3619
pos_1160	metab_1154	metab_1154	-	-	461.106	2.0983	pos	-	-	-	-	-	-	0.0022	5.8333	6.2877	5.7787	5.2794	5.7109	5.1775	5.8893	6.1587	5.8738	5.8256	6.3274	5.5593	5.675	6.5832	6.4969	6.505	5.9599	6.1041	6.4403	6.1531	6.3398	5.5112	5.9016	6.3889	6.0141	6.5283	6.4059	6.0607	6.4194	6.2225	6.3313	6.2593	6.2941	6.3148	6.3171
pos_1162	metab_1156	metab_1156	-	-	76.0397	2.118	pos	-	-	-	-	-	-	0.003	5.3978	5.4472	5.4225	4.8508	5.1909	4.8896	5.4421	5.5701	5.4096	5.3846	5.4394	5.1668	5.2201	5.641	5.6	5.6156	5.4514	5.7554	5.6486	5.6321	5.4985	5.7056	5.3643	5.6142	5.1294	5.4164	5.4436	5.3536	5.3412	5.2606	5.3263	5.2768	5.5085	5.5119	5.5356
pos_1163	metab_1157	metab_1157	-	-	91.0544	2.118	pos	-	-	-	-	-	-	0.0027	5.2626	5.3131	5.2829	4.7397	5.072	4.7698	5.3098	5.4292	5.2854	5.2587	5.3091	5.0369	5.0883	5.5024	5.4666	5.482	5.3181	5.6132	5.5155	5.5025	5.3639	5.5626	5.2335	5.4806	5.0204	5.3069	5.3226	5.2301	5.2262	5.1394	5.205	5.1621	5.3775	5.381	5.3947
pos_1164	metab_1158	metab_1158	-	-	357.122	0.4983	pos	-	-	-	-	-	-	0.0064	3.6876	3.4142	3.8989	3.5973	3.6322	3.2212	3.6708	3.4879	3.3655	3.0959	3.423	2.9067	2.951	5.1017	4.7356	5.0654	3.5819	3.6041	3.4301	3.6403	3.6841	5.5771	3.457	3.5267	3.1591	3.4009	3.4781	2.9926	3.6658	3.2658	3.4566	3.2453	4.5857	4.5286	4.6022
pos_1165	metab_1159	metab_1159	-	-	638.11	2.118	pos	-	-	-	-	-	-	0.0054	4.9658	4.8571	4.9287	4.3985	4.8354	4.3646	4.9127	4.9378	4.8948	4.8693	4.7106	4.8237	4.7237	4.7006	4.7275	4.795	4.9307	5.1006	4.9153	5.1367	4.7915	5.0419	4.895	4.8484	4.7648	4.7993	4.699	4.9235	4.6048	4.8109	4.7144	4.7484	4.8858	4.8539	4.9225
pos_1166	metab_1160	metab_1160	-	-	265.111	0.4983	pos	-	-	-	-	-	-	0.0058	4.2029	4.2029	3.9372	3.9986	3.9835	4.0057	3.4957	4.2049	4.4564	4.3815	4.0353	4.0218	4.2145	4.2981	4.5409	4.4025	4.4232	4.264	4.4401	4.374	4.0572	4.7249	4.3672	4.3121	3.9941	5.021	4.9147	4.2099	4.2644	4.9303	4.8873	4.9682	4.5426	4.5215	4.5241
pos_1168	metab_1162	metab_1162	-	-	288.166	0.4983	pos	-	-	-	-	-	-	0.0021	3.5756	4.3069	3.6186	4.3737	3.503	4.0283	3.6584	3.8917	4.0483	3.944	3.9412	4.1132	3.7753	3.9663	3.958	4.0208	3.9427	4.0732	3.9625	4.0589	4.1343	4.1531	3.9358	4.0203	4.2187	3.9373	4.1036	3.6032	3.3634	4.0832	4.0889	4.0274	3.8567	3.8346	3.8497
pos_1169	metab_1163	metab_1163	-	-	219.112	2.118	pos	-	-	-	-	-	-	0.0093	3.3035	3.9141	3.2844	2.9446	3.3322	2.5716	3.5106	3.7292	3.5604	3.6287	3.745	3.3249	3.4549	4.2483	4.158	4.1515	3.5662	3.5738	3.749	3.8786	3.2468	4.3787	3.6133	3.6681	3.5733	3.9994	3.9663	3.7436	3.8735	3.7755	3.9446	3.7697	3.8759	3.885	3.9298
pos_1170	metab_1164	metab_1164	-	-	591.253	2.1373	pos	-	-	-	-	-	-	0.0113	3.6408	5.5726	3.2232	4.7712	3.1676	3.1049	4.9314	5.0017	3.2406	3.2668	5.3312	3.1469	3.1741	4.6601	4.5906	4.5073	3.2808	3.316	3.395	3.376	3.9764	3.8765	3.2713	3.9127	3.2747	4.1899	4.4578	3.3525	5.0674	4.2241	4.4909	4.4639	4.4892	4.4636	4.5536
pos_1171	metab_1165	metab_1165	-	-	291.064	2.1373	pos	-	-	-	-	-	-	0.008	4.6351	4.3769	4.6574	4.5801	4.6171	4.5414	4.6308	4.4477	4.6027	4.5826	4.3929	4.666	4.6828	4.1731	4.3142	4.4181	4.5682	4.3863	4.3152	4.4636	4.3309	3.5542	4.5693	4.2535	4.532	4.1065	4.2658	4.5327	4.291	4.4632	4.3766	4.4127	4.4638	4.3761	4.4505
pos_1172	metab_1166	metab_1166	-	-	124.04	0.4983	pos	-	-	-	-	-	-	0.0123	4.1931	4.684	4.1789	5.0059	4.0873	4.769	4.1075	3.8255	4.3654	4.0709	3.9318	4.6435	4.4696	4.1702	4.0392	4.1282	4.0454	3.9713	3.856	4.05	3.9367	4.2001	4.154	3.937	4.7505	4.49	4.6292	4.266	3.9969	4.654	4.6535	4.5762	4.0343	3.8969	3.9676
pos_1173	metab_1167	metab_1167	-	-	292.084	2.1572	pos	-	-	-	-	-	-	0.0064	4.6901	4.4241	4.6982	4.5775	4.6672	4.5855	4.6901	4.5797	4.6926	4.6604	4.4773	4.6726	4.7359	4.3594	4.3294	4.5371	4.6326	4.5448	4.4323	4.5816	4.4429	3.5505	4.6339	4.3655	4.64	4.2565	4.3709	4.6159	4.3938	4.5316	4.5067	4.5081	4.5675	4.4896	4.5195
pos_1174	metab_1168	metab_1168	-	-	273.054	2.1572	pos	-	-	-	-	-	-	0.0034	5.3627	5.1338	5.3922	5.2834	5.3663	5.2691	5.3549	5.2361	5.3564	5.3401	5.1554	5.3785	5.3991	5.0877	5.0759	5.1891	5.3253	5.2143	5.1573	5.2497	5.1403	4.7706	5.3301	5.1136	5.3027	4.9842	5.0514	5.2867	5.0508	5.2318	5.1767	5.1854	5.238	5.189	5.2137
pos_1175	metab_1169	metab_1169	-	-	117.102	0.3235	pos	-	-	-	-	-	-	0.0003	4.4675	4.3003	4.4618	4.5924	4.5053	4.6265	4.4585	4.3354	4.4709	4.443	4.3076	4.5578	4.5695	4.2892	4.2579	4.3678	4.3924	4.2855	4.2553	4.3751	4.312	4.2825	4.443	4.2815	4.4715	4.2869	4.2889	4.4282	4.308	4.4292	4.3626	4.3869	4.3446	4.3422	4.3409
pos_1176	metab_1170	metab_1170	-	-	209.091	2.1572	pos	-	-	-	-	-	-	0.0083	3.2242	3.6162	3.3068	3.1206	3.0468	2.8794	2.9193	3.5817	2.8951	3.2971	3.7801	3.1441	3.1065	4.4842	4.2991	4.3014	3.56	3.6938	3.9526	3.7571	3.6335	3.8778	3.2388	3.8343	3.3838	3.8965	3.9244	3.3116	4.0233	3.6919	3.657	3.6992	3.9424	3.8604	3.9316
pos_1177	metab_1171	metab_1171	-	-	171.149	0.4983	pos	-	-	-	-	-	-	0.0016	4.3892	4.8342	4.5457	4.4556	4.3192	4.4585	4.517	4.5291	4.7313	4.616	4.5344	4.636	4.5637	4.9265	4.7919	4.8746	4.5115	4.5446	4.7289	4.8316	4.7423	5.292	4.66	4.7565	5.0206	5.0934	5.0227	4.5761	4.6481	4.9267	4.9355	4.8831	4.8037	4.8072	4.8028
pos_1178	metab_1172	metab_1172	-	-	621.264	2.1777	pos	-	-	-	-	-	-	0.0043	4.3449	5.9522	3.2639	5.1562	3.2083	3.4297	5.2919	5.3597	3.2813	3.336	5.6275	3.6409	3.2148	5.227	5.1121	5.1239	3.3216	3.3568	4.2928	3.4168	4.2982	3.4272	3.5636	4.1383	3.9214	3.9942	4.7	3.3933	5.3115	4.5343	4.8683	4.7952	5.016	4.9577	5.0004
pos_1179	metab_1173	metab_1173	-	-	200.127	0.3235	pos	-	-	-	-	-	-	0.0008	4.2798	4.0289	4.2408	4.3707	4.2877	4.4019	4.2295	4.0908	4.2267	4.2059	4.0836	4.3177	4.3445	3.9992	4.01	4.1047	4.1643	4.0752	4.0115	4.1431	4.0685	3.9104	4.2354	4.057	4.2112	3.9855	4.0241	4.2229	4.0978	4.1703	4.1065	4.1501	4.0888	4.0891	4.0969
pos_1180	metab_1174	metab_1174	-	-	263.088	2.1777	pos	-	-	-	-	-	-	0.0109	4.0769	4.2377	3.8731	3.2366	3.7708	2.533	4.0573	4.2477	4.0395	3.9503	4.2822	3.3155	3.285	3.8741	4.048	3.9828	4.0489	3.7196	4.2851	3.8194	4.1157	3.4425	4.0576	4.0822	4.0424	4.4531	4.4395	4.1251	4.5571	4.3219	4.4146	4.4128	4.2535	4.244	4.2805
pos_1181	metab_1175	metab_1175	-	-	209.116	2.1777	pos	-	-	-	-	-	-	0.0011	4.6612	4.7609	4.4869	4.339	4.4207	4.1352	4.581	4.7858	4.6224	4.71	4.9524	4.2863	4.445	4.9311	4.9743	4.8989	4.7031	4.6993	4.8733	4.7341	4.794	4.848	4.6883	4.8243	4.6574	5.227	5.1154	4.952	5.2822	5.0091	5.1016	5.0872	4.9193	4.9121	4.9045
pos_1183	metab_1177	metab_1177	-	-	239.088	2.1975	pos	-	-	-	-	-	-	0.004	3.9175	4.2139	3.8581	3.3406	3.5363	3.2331	4.0784	4.1222	3.8356	4.0167	4.2605	3.6501	3.6433	4.3041	4.3584	4.3393	3.9151	4.3247	4.2387	4.0548	4.4094	4.53	3.8831	4.3657	4.1867	4.9341	4.7238	4.3421	4.8541	4.5992	4.7259	4.6695	4.4998	4.4861	4.4841
pos_1185	metab_1178	metab_1178	-	-	243.133	2.1777	pos	-	-	-	-	-	-	0.0059	4.4214	4.7268	4.4238	3.9877	4.4298	3.8008	4.4103	4.7415	4.6032	4.7172	4.7783	4.3203	4.1382	4.8736	4.9202	4.7937	4.7461	5.161	4.9863	4.9709	5.0722	4.8538	4.7528	5.1178	4.574	4.9742	4.9168	4.5766	4.8866	4.7035	4.8529	4.7835	4.8511	4.7771	4.8395
pos_1186	metab_1179	metab_1179	-	-	299.195	2.1975	pos	-	-	-	-	-	-	0.0088	3.5841	4.0445	3.8392	2.8329	3.2722	3.0342	3.111	4.155	3.6862	3.9189	4.1611	2.9853	2.8244	4.3656	4.3803	4.251	3.9282	4.2531	4.2657	4.1691	4.0905	4.1119	3.7698	4.3019	2.925	3.8996	4.0527	3.4971	3.8688	3.5192	3.6861	3.5279	3.9418	3.9179	3.9424
pos_1187	metab_1180	metab_1180	-	-	433.112	2.1975	pos	-	-	-	-	-	-	0.0037	4.8866	5.9344	5.2983	5.3403	4.299	4.3826	5.5531	5.6139	4.4244	4.5167	5.9724	4.6439	5.3309	6.0704	5.8692	5.9364	4.8595	4.6778	5.1793	5.6774	4.931	3.7676	4.5902	5.1985	5.0848	5.2913	5.5293	5.0208	5.6434	5.2928	5.4594	5.4137	5.5932	5.539	5.5477
pos_1188	metab_1181	metab_1181	-	-	204.101	2.259	pos	-	-	-	-	-	-	0.0071	3.1414	3.9349	3.1679	3.2161	2.9683	2.9831	3.1272	3.3568	3.83	3.4229	3.1289	3.5831	3.6449	4.2264	4.1101	4.1908	3.4014	2.991	4.2945	3.3308	3.5171	3.7822	3.5227	3.6386	3.9197	4.2866	4.207	3.5913	3.7062	4.1975	4.2118	4.1702	3.9414	3.9438	3.9632
pos_1189	metab_1182	metab_1182	-	-	292.211	2.218	pos	-	-	-	-	-	-	0.0038	4.2171	4.4434	4.1689	4.04	4.0298	3.9119	4.332	4.4221	4.191	4.3251	4.5556	4.0313	4.2951	4.6147	4.5517	4.6125	4.317	4.1412	4.3951	4.3905	4.5103	4.3197	4.2507	4.4377	4.3299	4.809	4.5727	4.5893	4.8	4.7191	4.7522	4.7262	4.5321	4.5454	4.5726
pos_1190	metab_1183	metab_1183	-	-	284.148	2.218	pos	-	-	-	-	-	-	0.0052	5.2084	5.1715	5.1533	5.3665	5.2558	5.3858	5.2	5.119	5.1802	5.1893	5.0967	5.2874	5.3083	5.1252	5.1045	5.1314	5.1155	5.1135	5.0741	5.0408	5.1319	5.0805	5.1542	5.1056	5.2749	5.3069	5.1388	5.2269	5.2504	5.2798	5.2799	5.2643	5.2059	5.1928	5.1688
pos_1191	metab_1184	metab_1184	-	-	163.111	2.259	pos	-	-	-	-	-	-	0.0036	4.2455	4.3727	4.2377	4.0633	4.0791	4.0541	4.2348	4.3855	4.1985	4.323	4.418	4.0951	4.1557	4.4785	4.539	4.471	4.259	4.3319	4.4805	4.3843	4.4203	4.5433	4.2816	4.4581	4.3732	4.8273	4.7372	4.4812	4.834	4.6005	4.6811	4.6432	4.4945	4.5327	4.4926
pos_1192	metab_1185	metab_1185	-	-	410.18	2.259	pos	-	-	-	-	-	-	0.0085	2.8037	3.7997	2.7808	2.6498	2.7253	2.6626	3.0786	2.9081	3.4103	2.8244	3.8695	2.7046	2.7317	4.2058	4.0238	3.9942	3.2474	2.8735	4.1697	2.9335	4.017	3.2368	2.8138	4.1151	4.0002	4.8844	5.0393	3.7463	4.5206	4.3308	4.5255	4.4529	4.1509	4.2394	4.2119
pos_1193	metab_1186	metab_1186	-	-	303.154	2.259	pos	-	-	-	-	-	-	0.0119	4.2024	3.567	3.6125	2.5596	3.8524	2.5724	4.1288	3.9511	3.2349	3.6721	4.3609	3.1871	2.8893	3.9141	3.7901	3.5327	3.7912	3.8864	3.9075	3.8206	3.8811	3.9377	3.4212	4.0002	3.5906	4.0222	3.9057	4.0716	4.6087	3.653	3.7307	3.788	3.7488	3.694	3.8043
pos_1194	metab_1187	metab_1187	-	-	282.1	2.2995	pos	-	-	-	-	-	-	0.0041	4.5386	4.2729	4.3995	3.3263	4.2818	3.4883	4.4554	4.3386	4.2028	4.503	4.4224	4.0337	4.0945	4.1519	4.2968	4.1865	4.4338	4.269	4.2204	4.508	4.417	3.956	4.3293	4.2771	4.2767	4.2679	4.2716	4.5578	4.5815	4.2399	4.246	4.2597	4.3128	4.3201	4.2943
pos_1195	metab_1188	metab_1188	-	-	256.117	2.2995	pos	-	-	-	-	-	-	0.006	4.0792	4.6542	4.0811	3.5079	3.9011	2.366	3.9598	4.3652	3.82	4.4401	4.3418	3.8789	3.5344	4.7728	4.7835	4.7315	4.5064	4.4165	4.5725	4.3847	4.8134	4.8467	4.4256	4.68	4.6142	5.0457	4.43	4.3502	4.5706	4.6271	4.7026	4.6052	4.6832	4.689	4.6444
pos_1196	metab_1189	metab_1189	-	-	271.038	2.3397	pos	-	-	-	-	-	-	0.008	4.5103	4.4026	4.4605	4.143	4.4107	3.9261	4.5881	4.5289	4.4778	4.6296	4.6484	4.1796	4.4043	4.531	4.5439	4.5601	4.5395	4.5741	4.5397	4.5682	4.4907	4.5686	4.6476	4.4948	4.5935	4.3681	4.388	4.524	4.4566	4.5855	4.5242	4.4962	4.6095	4.567	4.6394
pos_1197	metab_1190	metab_1190	-	-	223.074	2.4433	pos	-	-	-	-	-	-	0.0135	3.8202	3.5377	3.6938	3.932	3.7267	3.8857	3.6411	3.7178	3.5023	3.5862	3.7108	3.7805	3.8063	4.0427	3.8781	3.8613	3.7551	4.4341	4.0962	3.7889	3.2592	4.9146	3.6044	3.7985	3.7382	3.9953	4.02	3.8129	3.8797	3.8723	3.8578	3.8573	3.8137	3.9352	3.9108
pos_1198	metab_1191	metab_1191	-	-	861.184	2.4629	pos	-	-	-	-	-	-	0.0054	4.2361	4.7113	3.9397	3.1688	3.8996	3.1816	4.036	4.6242	4.3826	3.747	4.606	3.4146	3.5021	4.7891	4.6751	4.6578	4.3067	4.6437	4.9909	4.5174	5.007	3.4632	3.8927	4.9225	4.2081	5.3098	5.1253	4.5825	4.9826	4.7004	4.9682	4.8259	4.7705	4.7033	4.7385
pos_1199	metab_1192	metab_1192	-	-	716.096	2.4629	pos	-	-	-	-	-	-	0.0052	4.4056	4.3292	4.161	3.1349	3.8323	3.1477	3.738	4.6777	3.9586	3.5345	4.4409	3.1897	3.2169	4.6666	4.5781	4.5113	4.3357	5.1006	4.9037	4.6005	4.2732	3.4293	3.7654	4.6242	3.3176	4.2967	4.1263	3.7951	3.8249	3.5318	3.9287	3.7822	4.567	4.5557	4.6012
pos_1200	metab_1193	metab_1193	-	-	442.169	2.4629	pos	-	-	-	-	-	-	0.0157	3.7351	4.0056	3.2319	2.834	3.5593	2.8468	3.607	3.9258	3.3992	3.8852	4.3316	3.3713	2.916	3.9795	4.2111	3.9688	4.1578	4.6195	4.0684	4.1612	4.374	3.1282	4.0271	4.1728	3.0166	4.5018	4.6907	4.0839	4.3877	3.8809	4.1336	4.0616	4.1255	4.2061	4.0696
pos_1201	metab_1194	metab_1194	-	-	444.221	2.4629	pos	-	-	-	-	-	-	0.0108	3.9689	4.3258	3.7872	3.1123	3.5528	3.1252	3.4107	4.2457	3.964	3.6158	4.1123	3.1672	3.1944	4.3272	4.3255	4.335	4.0019	4.1993	4.4725	4.2093	4.2828	3.795	3.8295	4.2716	3.7642	4.5841	4.4122	4.2021	4.1349	4.2698	4.1194	4.2419	4.2328	4.3553	4.3146
pos_1202	metab_1195	metab_1195	-	-	410.179	2.4822	pos	-	-	-	-	-	-	0.004	3.2151	4.3484	2.5452	2.4143	2.4897	2.4271	4.0625	4.0797	4.2494	2.5887	4.5666	3.6942	2.4962	4.7261	4.5532	4.6468	3.8536	3.6069	4.3607	3.9464	4.4202	3.9912	2.8867	4.3015	4.5198	4.9945	5.1433	4.4081	4.9196	4.6829	4.8353	4.7248	4.5883	4.5411	4.5476
pos_1203	metab_1196	metab_1196	-	-	450.138	2.4822	pos	-	-	-	-	-	-	0.0037	4.4722	5.4093	4.8876	4.3763	3.6573	3.5549	4.8529	5.168	3.8399	3.9672	5.4119	3.9621	4.5004	5.3692	5.2145	5.2983	4.4362	4.2464	4.6293	5.2169	4.4567	3.4118	4.0556	4.7097	4.7429	5.1402	5.1732	4.7755	5.1732	4.9127	5.0019	4.9875	5.0761	5.0806	5.0545
pos_1204	metab_1197	metab_1197	-	-	233.127	2.4822	pos	-	-	-	-	-	-	0.0033	3.8704	4.5915	4.0731	3.9532	3.7956	3.5659	4.8533	4.5513	4.7959	4.2324	4.4745	4.2166	4.1836	5.1518	4.9709	5.0787	4.3532	4.8232	4.1732	4.4879	4.3717	4.7005	3.7778	4.4064	3.9276	4.5198	4.4781	4.1178	4.4637	4.2174	4.3034	4.284	4.7157	4.7001	4.6748
pos_1205	metab_1198	metab_1198	-	-	511.057	2.4822	pos	-	-	-	-	-	-	0.0056	4.7863	4.5383	4.6987	2.8459	4.0205	3.2162	4.3929	4.7762	4.5943	4.3958	4.6793	4.0498	4.0801	4.7041	4.6385	4.6892	4.7221	4.9918	4.8416	4.7463	4.3782	3.452	4.4414	4.6359	3.0285	4.1475	4.1674	4.273	3.4353	3.7867	3.8593	3.997	4.7633	4.6896	4.7143
pos_1206	metab_1199	metab_1199	-	-	156.101	0.1923	pos	-	-	-	-	-	-	0.0017	4.4321	4.1903	4.3785	4.5085	4.4358	4.5297	4.3608	4.1953	4.3725	4.3096	4.1933	4.4421	4.4517	4.1194	4.1595	4.2465	4.3047	4.2029	4.1525	4.2775	4.2176	4.0539	4.3993	4.2008	4.3626	4.114	4.1315	4.3573	4.2134	4.3059	4.2343	4.2633	4.2353	4.2168	4.2182
pos_1207	metab_1200	metab_1200	-	-	127.966	0.04	pos	-	-	-	-	-	-	0.0047	3.9815	3.7825	3.9711	4.0639	4.0106	4.1182	3.9964	3.8541	3.9344	3.9333	3.8328	4.0516	4.0531	3.7326	3.7397	3.8199	3.9232	3.813	3.7804	3.8536	3.795	3.6496	3.9538	3.7934	3.9383	3.7005	3.7454	3.9595	3.8415	3.91	3.8358	3.87	3.8921	3.8574	3.8421
pos_1208	metab_1201	metab_1201	-	-	264.127	0.04	pos	-	-	-	-	-	-	0.0078	4.1976	4.0078	4.1946	4.3154	4.245	4.3587	4.2268	4.0561	4.2115	4.1114	3.9962	4.3033	4.3032	4.008	3.9737	4.0494	4.166	4.0722	3.9708	4.0915	4.0243	3.8619	4.1614	4.0112	4.2091	3.9972	4.009	4.2171	4.0737	4.1819	4.0955	4.1251	4.1444	4.0856	4.0891
pos_1209	metab_1202	metab_1202	-	-	100.039	0.0834	pos	-	-	-	-	-	-	0.0132	3.7238	3.5406	3.7094	3.8183	3.7525	3.8557	3.718	3.5576	3.6947	3.672	3.559	3.7876	3.7893	3.483	3.4468	3.5479	3.676	3.5802	3.5049	3.6206	3.5604	3.3961	3.6995	3.5086	3.7637	3.5516	3.5376	3.7459	3.6246	3.6809	3.6191	3.6399	3.6692	3.5918	3.5557
pos_1210	metab_1203	metab_1203	-	-	90.0915	0.1923	pos	-	-	-	-	-	-	0.0039	4.3516	4.1643	4.336	4.4782	4.3874	4.494	4.3375	4.1958	4.3313	4.302	4.1687	4.4065	4.4336	4.1132	4.1069	4.1958	4.2851	4.1756	4.1313	4.2379	4.1723	4.0442	4.3355	4.1486	4.3386	4.1043	4.1341	4.3196	4.1849	4.2967	4.2284	4.2612	4.2339	4.2129	4.207
pos_1211	metab_1204	metab_1204	-	-	231.97	0.1923	pos	-	-	-	-	-	-	0.0038	4.5448	4.3846	4.5282	4.7084	4.5922	4.7394	4.5529	4.4054	4.565	4.5156	4.3992	4.6683	4.6588	4.3466	4.3131	4.3793	4.4903	4.3808	4.3277	4.4286	4.3599	4.2318	4.5028	4.3271	4.5685	4.3359	4.3733	4.5376	4.402	4.5187	4.4521	4.4989	4.4582	4.4182	4.4232
pos_1212	metab_1205	metab_1205	-	-	79.0182	0.258	pos	-	-	-	-	-	-	0.0045	4.2946	4.2115	4.292	4.5548	4.3322	4.4537	4.3145	4.1518	4.2963	4.2594	4.1188	4.3894	4.4056	4.142	4.048	4.1655	4.2387	4.1183	4.0755	4.1469	4.0858	3.9789	4.2512	4.0519	4.3144	4.1117	4.1174	4.2441	4.1615	4.2759	4.2115	4.2452	4.2208	4.2174	4.1731
pos_1213	metab_1206	metab_1206	-	-	158.002	0.2799	pos	-	-	-	-	-	-	0.004	4.6399	4.4447	4.6351	4.755	4.6673	4.7882	4.6478	4.482	4.6117	4.6018	4.4605	4.7438	4.7391	4.406	4.3875	4.4741	4.5796	4.4705	4.3987	4.5047	4.4378	4.2994	4.5961	4.4107	4.6288	4.3905	4.4182	4.6113	4.4681	4.5783	4.4801	4.537	4.5209	4.4816	4.4739
pos_1215	metab_1208	metab_1208	-	-	70.0656	0.3462	pos	-	-	-	-	-	-	0.0045	3.586	3.3799	3.5803	3.6977	3.6435	3.7497	3.5725	3.4298	3.566	3.5518	3.4457	3.6547	3.689	3.3577	3.3509	3.4453	3.4887	3.397	3.3539	3.4444	3.3865	3.2393	3.5507	3.3981	3.4949	3.2846	3.3155	3.5288	3.3835	3.4949	3.4155	3.4642	3.3982	3.4202	3.4359
pos_1216	metab_1209	metab_1209	-	-	138.034	0.3462	pos	-	-	-	-	-	-	0.0048	3.7699	3.5625	3.7375	3.8592	3.8277	3.9409	3.7812	3.6342	3.7709	3.7008	3.578	3.8493	3.8474	3.5532	3.5144	3.6131	3.739	3.6301	3.5523	3.6639	3.5729	3.4439	3.7227	3.5671	3.7604	3.535	3.5853	3.7795	3.6245	3.7285	3.6613	3.6936	3.6736	3.6398	3.6459
pos_1217	metab_1210	metab_1210	-	-	436.341	0.3677	pos	-	-	-	-	-	-	0.0034	5.1212	4.9115	5.1055	5.2376	5.1718	5.2859	5.1188	4.9684	5.116	5.0889	4.9625	5.193	5.2223	4.8832	4.8807	4.9585	4.9963	4.9155	4.8776	4.986	4.9248	4.756	5.0519	4.9128	5.0476	4.8255	4.8329	5.0481	4.9153	5.0077	4.9457	4.9935	4.9563	4.9472	4.9913
pos_1218	metab_1211	metab_1211	-	-	158.096	0.3677	pos	-	-	-	-	-	-	0.0073	3.667	3.44	3.6548	3.8191	3.6581	3.8012	3.6568	3.4975	3.6771	3.6143	3.5025	3.7209	3.7521	3.4296	3.4063	3.5165	3.5772	3.4866	3.4096	3.5482	3.4594	3.3156	3.633	3.4554	3.6564	3.3745	3.4239	3.6273	3.495	3.5921	3.4505	3.5798	3.5235	3.4859	3.5532
pos_1220	metab_1213	metab_1213	-	-	160.986	0.4114	pos	-	-	-	-	-	-	0.0007	4.5311	4.3394	4.531	4.6438	4.5838	4.6791	4.5465	4.3957	4.5121	4.5093	4.3784	4.6099	4.6237	4.3191	4.2897	4.3897	4.4519	4.3517	4.3009	4.4107	4.3493	4.1862	4.4923	4.3139	4.4869	4.26	4.2993	4.493	4.3655	4.4454	4.3867	4.4273	4.4068	4.4007	4.4001
pos_1221	metab_1214	metab_1214	-	-	130.966	0.4544	pos	-	-	-	-	-	-	0.005	4.1308	3.9178	4.1301	4.2379	4.1515	4.2763	4.1504	3.9762	4.136	4.1554	4.0973	4.1572	4.2109	3.9169	3.887	3.993	4.0653	3.98	3.8822	4.0307	3.9825	3.85	4.1128	3.9512	4.0815	3.8616	3.8852	4.1208	4.0047	4.0543	3.9452	4.0225	4.0285	3.9715	3.9999
pos_1222	metab_1215	metab_1215	-	-	223.063	0.4544	pos	-	-	-	-	-	-	0.0057	4.559	4.4002	4.5605	4.6975	4.6221	4.7563	4.6031	4.4382	4.6	4.5507	4.4901	4.71	4.6768	4.3737	4.351	4.4624	4.4997	4.4006	4.3141	4.4523	4.3928	4.2459	4.5043	4.3502	4.5614	4.3232	4.3319	4.5353	4.3905	4.4688	4.4207	4.471	4.456	4.4012	4.4345
pos_1224	metab_1217	metab_1217	-	-	234.18	0.4983	pos	-	-	-	-	-	-	0.0029	3.2516	3.981	3.5241	2.7441	2.9879	2.7569	3.1968	3.6868	3.5395	3.6657	4.028	3.499	2.8383	3.99	4.0258	3.8856	3.7639	3.6542	4.3917	4.2874	4.2226	4.1691	3.7669	4.3358	3.9118	4.0245	3.7836	3.3059	3.6985	3.7636	3.7456	3.7261	3.9154	3.9035	3.8855
pos_1225	metab_1218	metab_1218	-	-	244.946	0.4983	pos	-	-	-	-	-	-	0.0189	3.767	4.0887	3.6127	4.3263	3.2765	4.3383	3.4493	2.9849	4.0126	3.4165	2.8811	4.2079	4.118	3.8084	3.7042	3.708	3.4126	3.3674	3.4531	3.3011	3.2014	3.772	3.5646	3.3785	4.2388	3.9893	4.0778	3.9254	3.4432	4.2269	4.0737	4.0868	3.376	3.286	3.3036
pos_1226	metab_1219	metab_1219	-	-	112.112	0.4983	pos	-	-	-	-	-	-	0.0057	3.4557	3.4351	3.3834	3.6599	3.2837	3.4841	3.3667	3.2145	3.4932	3.2714	3.3246	3.4906	3.4612	3.4952	3.3206	3.4331	3.2994	3.2959	3.3112	3.4101	3.5228	3.9273	3.4145	3.4726	3.4912	3.5567	3.4638	3.3447	3.2725	3.4288	3.3603	3.3777	3.4365	3.382	3.4026
pos_1227	metab_1220	metab_1220	-	-	260.16	0.4983	pos	-	-	-	-	-	-	0.0099	3.3268	3.7876	3.4358	2.6203	3.0975	2.6371	3.475	3.5548	3.4689	3.4855	3.5787	3.2645	2.9939	3.785	3.5591	3.7292	3.566	3.7097	3.7263	3.7197	3.667	3.8702	3.4925	3.6583	3.2306	2.8779	3.3785	3.1649	3.2558	2.8999	3.2869	3.0025	3.4773	3.5381	3.5198
pos_1228	metab_1221	metab_1221	-	-	225.116	0.4983	pos	-	-	-	-	-	-	0.0056	3.0524	3.3363	3.3028	2.7723	3.0853	2.4851	3.1246	3.4405	3.0351	3.2695	3.2792	2.527	2.7593	3.607	3.4098	3.372	3.683	3.5645	3.5152	3.7382	3.7391	3.761	3.4015	3.6283	2.7922	3.6561	3.4974	2.7857	3.5017	3.1717	3.1295	3.32	3.5296	3.5677	3.578
pos_1229	metab_1222	metab_1222	-	-	303.026	0.4983	pos	-	-	-	-	-	-	0.0318	2.6345	3.8544	2.7007	4.2689	2.1394	3.882	2.2146	2.5482	3.1805	2.238	2.3619	3.7375	3.3472	3.2927	3.0244	3.1804	2.252	2.287	2.3656	2.3467	2.381	3.1202	2.2309	2.363	2.2459	2.6946	2.9939	2.3233	3.3336	3.482	3.3824	3.5093	2.3999	2.5635	2.5394
pos_1230	metab_1223	metab_1223	-	-	422.223	0.4983	pos	-	-	-	-	-	-	0.0149	3.1416	2.9988	3.445	2.5924	3.0901	2.6052	3.1072	3.3709	2.7605	3.5196	3.4136	2.6471	2.6743	3.409	3.3563	3.4577	3.5049	3.4391	3.3172	3.6044	3.6758	3.7427	3.5325	3.4566	2.8968	3.2546	2.9742	3.2139	3.5638	3.0743	3.4064	3.082	3.4591	3.4561	3.3538
pos_1231	metab_1224	metab_1224	-	-	255.938	0.4983	pos	-	-	-	-	-	-	0.0297	3.3699	3.8239	3.5353	4.3305	3.0674	3.967	3.3812	2.7273	3.7209	3.1115	3.0844	3.7546	3.7579	3.5573	3.3806	3.4477	3.0792	3.2263	3.1178	3.2255	3.0943	3.4669	3.4601	3.1924	3.8212	3.6328	3.6542	3.5422	3.3999	3.831	3.7379	3.7225	3.4534	3.2313	3.4277
pos_1232	metab_1225	metab_1225	-	-	224.12	0.4983	pos	-	-	-	-	-	-	0.0254	2.446	1.85	2.5406	3.3434	1.6618	1.3257	2.6096	3.3483	1.6753	2.6495	3.2429	1.3658	2.5221	3.3304	2.862	3.3502	1.8893	3.2393	2.9452	2.6486	3.06	3.1669	2.9156	2.9356	1.4889	3.2723	1.6835	2.7252	3.5826	3.2836	3.0253	2.9583	2.9664	2.8613	3.0743
pos_1234	Putrescine	metab_1227	HMDB0001414	C02896;C00134	89.1075	0.4983	pos	M+H	C4H12N2	89.3	-	2.26007	110-60-1	0.0011	2.9879	3.7139	3.1029	3.3352	2.873	3.1931	3.0339	3.1191	3.3935	3.1815	3.2042	3.3397	3.1466	3.5066	3.4025	3.4118	3.2231	3.3288	3.4274	3.5021	3.3181	4.0633	3.3016	3.4284	3.6701	3.7718	3.7473	3.223	3.0684	3.6798	3.6612	3.6116	3.3947	3.3945	3.3869
pos_1237	metab_1230	metab_1230	-	-	101.107	0.4983	pos	-	-	-	-	-	-	0.0243	2.9366	1.3755	2.5892	2.4132	2.5587	3.2073	2.7101	2.0304	1.8259	2.409	2.4236	0.9551	1.5841	1.3333	1.8963	1.7028	2.4151	2.0051	1.4084	2.315	2.1627	1.1738	2.4139	1.3159	3.0784	1.2758	1.2565	2.4944	2.4064	1.2024	1.2361	1.2248	2.1661	2.218	2.2946
pos_1238	metab_1231	metab_1231	-	-	171.095	0.5188	pos	-	-	-	-	-	-	0.0139	3.7085	3.8449	3.7813	3.6946	3.6736	3.5148	3.6847	3.7763	3.7603	3.7284	3.8585	3.6164	3.5807	3.8552	3.7377	3.8619	3.8695	3.8146	3.7546	3.8592	3.6512	4.1011	3.8108	3.718	3.7492	3.8259	3.843	3.7212	3.658	3.641	3.7107	3.651	3.8098	3.7043	3.7112
pos_1239	metab_1232	metab_1232	-	-	385.097	0.5188	pos	-	-	-	-	-	-	0.018	3.4967	3.3367	3.5836	3.0261	3.3064	2.1713	3.2014	3.9137	3.5907	4.0006	3.765	3.2481	2.2401	2.8138	3.7165	3.5897	3.9481	3.8709	3.9821	4.0363	4.0512	3.5404	3.9799	3.9613	2.3403	3.3485	2.9158	3.3297	2.8757	2.7556	2.5178	2.5058	3.8492	3.7585	3.6584
pos_1243	metab_1235	metab_1235	-	-	562.795	0.5391	pos	-	-	-	-	-	-	0.0019	4.7918	4.8485	4.1935	5.0956	5.4928	5.1463	5.3884	5.0533	5.2878	5.1855	5.0465	5.3042	3.5789	3.9536	4.5872	4.2175	5.2658	4.7717	4.812	5.0979	5.0175	4.2327	5.3289	4.9416	3.73	4.6745	4.2177	5.2105	3.3679	4.0513	3.5769	4.0239	4.9343	4.9235	4.9081
pos_1244	metab_1236	metab_1236	-	-	216.082	0.5391	pos	-	-	-	-	-	-	0.0039	3.927	4.043	4.0612	3.8376	4.4021	3.9399	4.2971	4.3329	4.1063	4.0896	4.3541	3.9594	4.0131	4.2398	4.2192	4.2457	4.3581	4.2697	4.2698	4.1874	4.1814	4.2971	4.0937	4.1936	4.2913	4.2691	4.1428	4.2409	4.4767	4.3209	4.2872	4.3328	4.229	4.2086	4.2186
pos_1246	metab_1238	metab_1238	-	-	898.639	0.5584	pos	-	-	-	-	-	-	0.007	5.1355	4.7434	4.3626	4.6855	4.9583	4.8141	4.4854	4.9528	5.298	5.2709	4.257	5.1201	4.1884	0.3732	4.6175	4.2389	4.9564	3.9974	4.0442	4.5086	4.6138	4.0937	5.1222	3.8714	0.282	4.5355	4.3705	5.1576	0.4066	4.3641	3.4408	4.3066	4.8632	4.8563	4.7775
pos_1247	metab_1239	metab_1239	-	-	548.82	0.5584	pos	-	-	-	-	-	-	0.0113	3.0204	3.7952	2.787	4.2263	4.7996	4.0621	4.8412	3.9913	4.3116	4.1571	4.4059	4.4957	3.1563	3.0112	2.993	3.0004	4.3507	4.4419	4.1167	4.4359	4.1233	2.9501	4.4648	4.3698	2.8384	3.4384	3.0379	4.1835	3.0674	2.9806	3.0164	3.0044	3.9287	3.9582	3.844
pos_1248	metab_1240	metab_1240	-	-	852.582	0.5584	pos	-	-	-	-	-	-	0.0306	2.9197	4.0371	2.8969	2.7658	2.8413	2.7786	2.9169	4.3925	2.9142	4.0914	3.0648	2.8206	2.8478	3.1211	4.3797	4.1366	3.6452	3.6198	3.0685	3.6619	3.9963	4.0049	2.9299	3.066	3.2888	3.1683	4.4846	4.4638	3.9141	4.4344	4.2408	4.4541	4.3692	4.3075	4.4194
pos_1251	Choline	metab_1242	HMDB0000097	C00114	104.107	0.5766	pos	M+H	C5H13NO	77.4	-	0.259154	62-49-7	0.0046	5.7848	5.1094	5.219	5.2004	5.5914	5.3622	5.9861	5.5003	6.2682	5.378	6.0373	5.2972	5.1167	5.2569	5.3456	5.5101	5.3287	5.4981	5.1167	5.2071	5.2938	5.6002	5.3289	5.269	5.7286	5.11	5.4302	5.9157	5.7523	5.7307	5.6855	5.7239	5.6159	5.6269	5.6806
pos_1252	metab_1243	metab_1243	-	-	138.074	0.5766	pos	-	-	-	-	-	-	0.0036	4.8513	4.579	4.8673	4.9884	4.7101	4.9797	4.6305	4.6448	4.7809	5.0809	4.463	4.869	5.0146	4.9163	4.833	4.8748	4.7549	4.5697	4.8159	4.8002	4.6922	4.5792	5.0272	4.7524	4.607	4.6621	4.6899	4.6509	4.4825	4.734	4.7128	4.693	4.7359	4.7504	4.7689
pos_1253	N1,N12-Diacetylspermine	metab_1244	HMDB0002172	C03413	287.243	0.5766	pos	M+H	C14H30N4O2	63	-	-3.77535	61345-83-3	0.0206	3.4553	4.073	3.5704	3.2584	3.3615	3.4988	3.6608	3.2016	3.7589	3.5911	3.4836	3.9801	3.3324	4.3568	4.0108	4.1373	3.2863	3.9842	4.2853	3.937	3.8579	5.0247	3.8851	3.8779	3.6432	4.1519	4.1164	3.2912	3.6647	3.8875	3.9079	3.8926	3.8217	3.8857	3.744
pos_1254	metab_1245	metab_1245	-	-	153.025	0.5766	pos	-	-	-	-	-	-	0.0087	4.7637	4.5103	4.8049	4.6028	4.6833	4.567	4.605	4.5987	4.5943	4.8834	4.5498	4.6951	4.7653	4.3957	4.4612	4.5476	4.5975	4.3404	4.4493	4.5042	4.6522	4.6592	4.8617	4.5404	4.3786	4.3857	4.395	4.355	4.3771	4.3993	4.3473	4.3368	4.55	4.5689	4.632
pos_1257	ADMA	metab_1247	HMDB0001539	C03626	203.15	0.5949	pos	M+H	C8H18N4O2	50.7	-	-3.41442	-	0.0045	5.5739	5.7564	5.5532	5.4813	5.4439	5.4007	5.4383	5.6261	5.5326	5.4701	5.5476	5.5815	5.4656	5.5858	5.5976	5.5349	5.5092	5.536	5.599	5.6376	5.5873	5.8355	5.5717	5.5725	5.6239	5.5634	5.6273	5.5584	5.4847	5.5219	5.5443	5.5136	5.5318	5.5866	5.5557
pos_1258	metab_1248	metab_1248	-	-	116.073	0.5949	pos	-	-	-	-	-	-	0.0087	3.949	3.8527	3.8661	3.8934	3.6917	3.7732	3.8987	3.9913	3.9186	4.0674	3.9772	4.0875	3.9211	3.577	3.846	3.7345	3.8859	3.6739	3.7795	3.892	4.0184	4.0565	3.9131	3.8562	3.8214	3.5257	3.7118	2.9036	3.6006	3.6277	3.7208	3.754	3.9072	3.8473	3.8245
pos_1260	metab_1250	metab_1250	-	-	152.147	0.5949	pos	-	-	-	-	-	-	0.0119	3.2468	3.6248	3.2239	3.0928	3.1683	3.1056	3.244	3.3513	3.2413	3.2675	4.0428	3.9455	3.9973	4.6108	4.3304	4.4759	3.2816	3.4549	3.3957	3.3768	4.2906	3.3872	3.257	4.0455	4.6059	4.7823	4.7188	4.5818	4.5994	4.6	4.6191	4.5645	4.2645	4.3034	4.271
pos_1261	metab_1251	metab_1251	-	-	127.025	0.5949	pos	-	-	-	-	-	-	0.0286	3.8339	3.6792	3.9796	4.1823	3.66	4.1571	3.6771	3.6376	3.6825	3.6217	3.2216	4.2539	4.2005	2.5617	3.1113	2.6118	3.7171	2.9679	3.3238	3.5679	2.8838	2.5008	3.7653	3.016	4.0853	2.9731	3.2937	3.7807	2.6179	3.2384	3.2142	3.156	3.0786	3.2418	3.0136
pos_1262	metab_1252	metab_1252	-	-	118.086	0.6126	pos	-	-	-	-	-	-	0.0017	6.0215	5.6276	5.7255	5.7025	6.036	5.6419	5.9397	5.7362	6.0216	5.6512	6.2168	5.6345	5.7199	5.7439	5.6805	5.8071	5.7865	5.4669	5.502	5.6165	5.5046	5.7264	5.6744	5.4772	6.0846	5.5941	5.7143	6.0606	5.7365	5.8345	5.7752	5.7756	5.7721	5.7773	5.7858
pos_1263	metab_1253	metab_1253	-	-	193.154	0.6126	pos	-	-	-	-	-	-	0.006	4.2218	4.2134	3.2023	3.0711	4.3395	3.084	4.2351	4.1997	4.097	4.0236	4.9844	4.0203	4.0085	4.7	4.5476	4.8002	4.297	3.783	4.1678	3.4901	4.3997	3.3655	3.595	4.2257	4.724	4.6341	4.7363	5.1513	4.7804	4.8997	4.8385	4.7905	4.7939	4.736	4.8146
pos_1264	metab_1254	metab_1254	-	-	176.164	0.6126	pos	-	-	-	-	-	-	0.0212	3.8399	4.0167	4.4721	3.7759	4.5465	4.0439	4.117	4.35	4.0275	4.517	3.9952	3.9518	4.2066	3.7665	4.051	3.8467	4.4314	4.6513	4.1196	4.4977	4.0765	4.6122	4.4152	4.1505	3.9193	3.8252	3.6482	4.0112	4.246	4.0973	4.0736	4.0554	4.087	3.9592	4.1874
pos_1266	metab_1256	metab_1256	-	-	145.105	0.6126	pos	-	-	-	-	-	-	0.0027	5.5519	5.638	5.5149	5.3162	5.5477	5.0707	5.5325	5.6416	5.3847	5.5617	5.5666	5.3846	5.4548	5.5722	5.569	5.6055	5.6805	5.6683	5.6307	5.7636	5.582	5.6579	5.6099	5.6285	5.8231	5.7787	5.8274	5.9172	5.9499	5.8498	5.8689	5.8869	5.7157	5.7524	5.7506
pos_1270	1-Methyladenosine	metab_1259	HMDB0003331	C02494	282.118	0.6304	pos	M+H	C11H15N5O4	71.1	-	-4.4605	15763-06-1	0.0021	5.4618	5.3411	5.5329	5.2158	5.4695	5.4945	5.4841	5.5007	5.4359	5.5083	5.4685	5.4116	5.3396	5.3314	5.4158	5.3216	5.3872	5.5667	5.3487	5.5554	5.5801	5.5454	5.5042	5.5197	5.8492	5.3747	5.4434	5.3611	5.5536	5.2975	5.3496	5.2981	5.4048	5.4287	5.4185
pos_1271	3'-O-Methylguanosine	metab_1260	HMDB0006038	-	339.14	0.6304	pos	M+ACN+H	C11H15N5O5	-	59.5	-4.32101	10300-27-3	0.0019	4.2886	4.2473	4.2402	4.0034	4.6606	4.1713	4.3574	4.6015	4.1774	4.2757	4.1038	4.1622	4.0734	5.7288	5.5168	5.6161	4.5096	4.449	4.4448	4.6269	4.557	6.3288	4.3129	4.5096	3.8463	4.6677	4.5916	3.8726	4.481	3.9376	4.4114	4.3083	5.2877	5.2725	5.2995
pos_1272	metab_1261	metab_1261	-	-	283.139	0.6304	pos	-	-	-	-	-	-	0.0062	4.552	4.5964	4.756	4.4327	4.8618	4.642	5.0366	4.7767	4.6644	4.7195	4.7101	4.6817	4.7688	4.3109	4.4825	4.3509	4.7341	4.4774	4.4308	4.6856	4.6669	4.7402	4.5467	4.5021	4.325	4.6229	4.7331	4.1595	4.6827	4.5852	4.6292	4.6373	4.5953	4.6679	4.6145
pos_1273	metab_1262	metab_1262	-	-	130.122	0.6304	pos	-	-	-	-	-	-	0.0025	3.7776	3.8988	3.8188	3.379	4.4011	3.2171	3.8384	3.9607	4.0995	3.905	4.2184	3.8096	3.4494	3.5576	3.7023	3.8378	3.9394	3.4095	3.6839	3.5698	4.4969	4.9899	3.5875	4.3573	4.3139	3.3604	3.343	3.794	4.3075	4.0657	4.1679	4.0633	4.2575	4.2809	4.2574
pos_1274	metab_1263	metab_1263	-	-	351.157	0.6304	pos	-	-	-	-	-	-	0.0128	3.4173	4.3609	3.3944	4.0013	3.3388	3.276	3.4145	3.6173	4.1444	3.9657	4.0848	4.0432	4.186	4.8128	4.5495	4.7009	4.1225	4.1843	4.8079	4.1204	4.487	4.794	4.1033	4.54	3.4459	4.8841	4.4673	3.5237	3.6751	4.2665	4.3737	4.2853	4.4498	4.5521	4.4479
pos_1275	metab_1264	metab_1264	-	-	323.137	0.6304	pos	-	-	-	-	-	-	0.0234	3.9348	3.0963	4.1324	4.6434	3.893	4.6922	3.9153	3.3389	4.0166	4.0814	3.1323	4.4673	4.0888	3.1887	3.1705	3.178	3.3202	3.0571	3.1361	3.1171	3.1177	3.1275	4.094	3.1335	4.0662	3.2359	3.2155	3.0937	3.245	3.1581	3.1939	3.1819	3.485	3.3503	3.4205
pos_1276	metab_1265	metab_1265	-	-	246.06	0.6304	pos	-	-	-	-	-	-	0.0257	4.083	3.8958	3.9441	3.8105	3.9694	3.6327	3.3949	3.3399	4.0964	3.7293	2.7113	4.0355	4.2258	2.7676	2.7494	2.9662	3.0901	2.6362	2.7151	2.6961	3.1186	2.7065	3.3331	2.7125	3.9614	3.7542	3.4623	3.5278	3.4055	4.161	3.9657	4.1288	3.7135	3.7206	3.4891
pos_1277	metab_1266	metab_1266	-	-	144.055	0.6304	pos	-	-	-	-	-	-	0.0105	3.9365	3.9391	3.9073	3.6954	3.9059	3.4064	3.8977	4.0236	3.7216	3.9406	3.5185	3.6892	3.8417	3.9803	3.8692	4.0396	4.0701	3.8171	3.9171	4.1878	3.9678	3.9094	3.9897	4.0729	4.2917	4.2487	4.1221	4.3469	4.3129	4.2279	4.275	4.3357	4.1283	4.2278	4.1202
pos_1279	metab_1267	metab_1267	-	-	158.044	0.6492	pos	-	-	-	-	-	-	0.008	4.3198	4.3431	4.1166	3.915	4.192	4.2006	4.0739	4.3622	4.4472	4.3302	4.0854	4.2258	3.9962	3.9359	3.9108	4.042	4.1211	3.9415	4.1375	3.8613	4.0058	3.4101	4.2657	3.885	4.2671	3.9421	4.2855	4.1844	4.0562	4.2396	4.1958	4.2548	4.1589	4.1912	4.0987
pos_1281	metab_1269	metab_1269	-	-	238.037	0.6492	pos	-	-	-	-	-	-	0.0077	3.4634	4.3214	3.4321	3.9978	3.3495	2.9649	3.3665	3.8726	4.3684	4.1534	3.2511	4.4197	4.3377	4.4134	4.1901	4.4282	4.0032	3.9277	4.1864	4.058	4.0864	3.8231	4.2684	3.9672	4.2234	4.2613	4.3524	3.6585	3.7504	4.4395	4.452	4.3812	4.3466	4.3882	4.2945
pos_1283	metab_1271	metab_1271	-	-	391.026	0.6492	pos	-	-	-	-	-	-	0.009	3.9218	4.2903	4.0222	3.5495	3.9498	3.5624	3.8851	4.4496	4.2908	4.4951	4.3165	3.7797	3.8497	4.4838	4.4678	4.3543	4.3587	4.1547	4.4089	4.4792	4.598	3.844	4.3272	4.3085	3.9948	4.5014	4.6399	4.2035	4.6756	4.5215	4.6107	4.5835	4.4537	4.5615	4.5088
pos_1284	metab_1272	metab_1272	-	-	231.097	0.667	pos	-	-	-	-	-	-	0.0046	4.1269	4.5231	4.2742	3.7628	4.198	3.8619	4.2637	4.4395	4.4406	4.1694	4.3991	4.1544	4.0498	4.5554	4.5258	4.5117	4.3514	4.4706	4.5111	4.458	4.4409	4.4003	4.3154	4.4559	4.4508	4.4003	4.3977	4.3137	4.4549	4.4046	4.4894	4.403	4.4716	4.4719	4.4512
pos_1285	metab_1273	metab_1273	-	-	85.0763	0.667	pos	-	-	-	-	-	-	0.0043	4.1509	4.3199	4.1404	4.1385	3.7711	3.8208	4.0713	3.8421	4.0445	4.3212	3.7843	4.1914	4.1093	3.4852	4.0292	3.3353	4.1983	3.5997	3.5047	4.2414	4.3191	3.5342	3.8468	3.8038	4.4002	3.4363	3.5052	4.1458	4.1491	3.9938	3.848	3.8121	4.1103	4.1207	4.0772
pos_1287	metab_1275	metab_1275	-	-	75.0557	0.667	pos	-	-	-	-	-	-	0.0202	3.2889	3.1873	3.2102	2.9642	3.0037	3.2788	3.2684	2.9278	2.8113	2.8043	3.0981	3.0767	2.922	2.8143	2.6497	2.678	3.1621	2.8928	2.9495	2.9067	3.0401	2.5078	2.9017	2.768	3.3363	3.2303	3.1271	3.2978	3.4487	3.2653	3.2553	3.2913	3.0803	3.1279	3.0175
pos_1288	metab_1276	metab_1276	-	-	224.102	0.667	pos	-	-	-	-	-	-	0.0125	3.5467	3.6015	3.6464	3.637	3.8516	3.4519	3.7993	3.5556	3.8177	3.7399	3.3292	3.8328	3.7363	3.6148	3.5242	3.2771	3.7421	3.3924	3.4739	3.5167	3.5643	3.9174	3.674	3.2667	3.5439	3.5302	3.6399	3.2698	3.4519	3.5506	3.6556	3.5241	3.4357	3.4983	3.5497
pos_1289	metab_1277	metab_1277	-	-	159.12	0.667	pos	-	-	-	-	-	-	0.0024	4.9631	5.1312	4.9749	4.7595	5.0232	4.3849	4.8163	5.1411	4.4974	5.024	5.2911	4.6816	4.7625	5.2663	5.2101	5.1866	5.2497	5.3782	5.1567	5.3087	4.9077	5.3674	5.0117	5.0268	5.1923	4.9632	5.016	5.16	5.1878	5.0942	5.1442	5.1106	5.1474	5.158	5.1707
pos_1291	metab_1279	metab_1279	-	-	170.038	0.667	pos	-	-	-	-	-	-	0.0071	0.5629	0.6448	0.5464	2.9977	0.5073	3.2788	3.2964	0.6413	3.1491	3.5076	0.6729	2.908	3.4296	2.7355	2.983	2.734	3.2452	2.924	2.8488	3.1134	3.2545	0.6692	3.4574	0.6739	3.645	3.0777	0.7397	3.1295	0.764	3.7973	3.4679	3.6151	3.3028	3.3003	3.2782
pos_1295	Niacinamide	metab_1282	HMDB0001406	C00153	123.055	0.6852	pos	M+H	C6H6N2O	57.8	-	-2.34797	98-92-0	0.0021	5.3748	5.776	5.5257	5.2983	5.5687	5.1715	5.5527	5.6346	5.5734	5.4986	5.8152	5.6251	5.3193	5.302	5.4914	5.3906	5.5963	5.532	5.6907	5.6587	5.4837	4.8259	5.6232	5.5895	5.0923	5.4459	5.3884	5.3046	5.4818	5.2986	5.366	5.357	5.4431	5.4721	5.4692
pos_1296	metab_1283	metab_1283	-	-	231.144	0.6852	pos	-	-	-	-	-	-	0.0048	5.7068	5.0943	5.4954	4.8062	5.4933	5.3527	5.4823	4.9369	5.3584	5.3917	4.9304	5.3239	5.2301	4.13	4.7148	4.1139	5.1198	4.5129	4.3536	4.7773	4.8577	4.4323	4.862	4.3458	5.2679	3.9805	4.2479	5.2673	4.9639	4.7318	4.4231	4.6009	4.7333	4.7492	4.7364
pos_1297	metab_1284	metab_1284	-	-	160.096	0.6852	pos	-	-	-	-	-	-	0.0079	4.7241	4.5289	4.7967	4.3498	5.0178	4.4558	4.7054	4.6417	4.5837	4.6553	4.6472	4.6918	4.6245	4.5963	4.5552	4.6322	4.6725	4.5153	4.4221	4.6436	4.9057	4.3606	4.5767	4.7678	4.8178	4.7569	4.7881	4.8425	5.0424	4.8467	4.8218	4.841	4.6675	4.7052	4.6718
pos_1298	metab_1285	metab_1285	-	-	277.092	0.6852	pos	-	-	-	-	-	-	0.0039	4.6287	4.8499	4.6235	1.9118	3.8157	3.4124	4.5807	4.8381	4.4803	4.4402	4.4951	4.129	4.1648	4.6131	4.6038	4.6129	4.7405	4.9608	4.73	4.8982	4.5219	5.2551	4.4008	4.6513	4.4366	4.7496	4.6255	4.4986	4.4449	4.4048	4.578	4.514	4.7987	4.7801	4.7464
pos_1299	metab_1286	metab_1286	-	-	168.113	0.6852	pos	-	-	-	-	-	-	0.0125	4.3582	4.728	3.8552	3.9127	3.4943	3.5656	4.6471	4.2124	3.8876	4.1355	4.1216	3.9541	3.8985	5.0265	4.8068	4.9596	3.7502	3.9807	4.1357	4.0399	3.6487	4.0465	3.937	3.7708	3.7825	3.6286	3.9305	3.7534	4.1822	4.075	4.0865	4.0483	4.4807	4.3438	4.4785
pos_1300	metab_1287	metab_1287	-	-	128.107	0.6852	pos	-	-	-	-	-	-	0.003	4.1148	4.1471	4.1207	4.0858	4.5776	4.0491	4.1329	4.1316	4.1631	4.1553	4.232	4.1891	4.1338	4.1777	4.1263	4.1457	4.292	4.0991	4.0784	4.1368	4.6606	3.8405	4.0219	4.4705	4.1779	4.0652	4.016	4.0083	4.6286	4.2422	4.3491	4.2985	4.2122	4.2146	4.2339
pos_1301	metab_1288	metab_1288	-	-	469.104	0.6852	pos	-	-	-	-	-	-	0.0127	3.5653	4.6244	3.568	3.4479	3.9209	3.3854	3.703	4.0237	4.1896	4.0978	4.3875	3.9913	3.5004	4.5448	4.5783	4.5731	3.8615	4.0727	4.4955	4.2925	4.0189	4.3767	3.8115	4.1503	4.3203	4.2957	4.498	3.82	3.5904	4.103	4.2971	4.3462	4.3049	4.3079	4.2584
pos_1302	metab_1289	metab_1289	-	-	194.048	0.6852	pos	-	-	-	-	-	-	0.019	3.6203	4.0158	3.9405	3.8825	3.6595	4.0769	3.9717	3.6501	3.9445	3.3665	3.8532	4.0731	3.9037	3.919	3.7843	3.8202	3.6831	3.8047	3.5713	4.0706	3.7942	3.3114	3.8298	3.7654	3.8532	4.0661	3.7768	3.8463	3.8545	3.8029	3.8515	3.7156	3.8124	3.7377	3.9076
pos_1305	metab_1292	metab_1292	-	-	131.081	0.6852	pos	-	-	-	-	-	-	0.023	3.5496	2.7684	3.5777	3.6133	3.2619	3.6432	3.5614	3.3256	3.2718	3.0052	3.1915	3.3796	3.6545	3.686	3.4031	3.6342	3.187	2.7686	3.0589	3.3603	3.0179	2.105	2.6437	3.1425	3.2994	3.5147	3.6547	3.4057	3.7482	3.4928	3.5981	3.6021	3.2412	3.4142	3.3707
pos_1307	metab_1294	metab_1294	-	-	170.055	0.6852	pos	-	-	-	-	-	-	0.0215	2.7783	3.1176	2.8643	2.9832	2.9192	2.4097	2.8772	2.9173	3.2346	2.8218	2.687	2.774	2.6149	3.468	3.4071	2.9422	2.867	2.612	2.9962	3.1274	2.9724	2.6823	2.5523	3.0495	3.1583	3.1137	3.5325	2.6484	2.7995	3.3756	3.5209	3.3615	2.9125	2.9922	3.0452
pos_1308	metab_1295	metab_1295	-	-	185.164	0.7248	pos	-	-	-	-	-	-	0.0099	3.301	3.9443	3.4514	3.4139	4.0579	3.6669	3.5007	3.7089	3.8141	3.4823	3.6494	3.5735	3.798	3.9732	3.7531	3.785	3.5082	3.7088	3.5968	3.8333	5.0307	4.7148	3.6457	4.8254	3.6516	3.7172	3.6992	3.6497	3.9332	3.5229	3.7918	3.674	4.0314	4.108	3.9996
pos_1309	metab_1296	metab_1296	-	-	330.058	0.7248	pos	-	-	-	-	-	-	0.0057	4.6843	4.6782	4.7406	3.8906	4.636	3.8532	4.6149	4.7842	4.6813	4.8982	4.7978	4.4016	4.5267	4.9552	4.8836	4.9398	4.6981	4.8311	4.8081	4.9837	4.9797	5.0433	4.8077	4.9058	4.6999	4.9376	4.8615	4.5129	4.9989	4.7723	4.8734	4.7632	4.863	4.8303	4.9054
pos_1310	metab_1297	metab_1297	-	-	232.128	0.7248	pos	-	-	-	-	-	-	0.0085	3.6466	4.1009	4.0505	3.6543	4.0329	3.5353	3.7578	3.9171	3.8559	4.0378	3.7959	3.7064	3.9289	4.0049	3.9364	4.0442	4.1408	4.1421	4.2041	4.1556	4.0795	3.9763	4.0836	4.1483	3.9104	4.1743	4.358	3.7242	4.2233	4.1403	4.1734	4.2055	4.1023	4.16	4.147
pos_1311	metab_1298	metab_1298	-	-	99.0441	0.7248	pos	-	-	-	-	-	-	0.0053	4.1623	4.0822	4.1534	4.2147	4.1702	4.2197	4.1536	4.0664	4.1409	4.1223	4.0866	4.2348	4.2112	4.3737	4.1874	4.3613	4.1333	3.9825	3.9999	4.0854	4.0848	4.0276	4.1547	4.0532	4.2471	4.115	4.0983	4.127	4.2022	4.2204	4.1761	4.1809	4.2057	4.191	4.1496
pos_1312	metab_1299	metab_1299	-	-	167.117	0.7248	pos	-	-	-	-	-	-	0.0107	3.2904	3.2709	3.4388	3.0913	3.3524	2.9807	3.3536	3.3139	3.3874	3.2883	3.6778	3.5829	3.5717	4.5072	4.2483	4.2782	2.5876	3.0737	3.0355	3.0422	3.2907	3.4469	2.854	2.7653	3.3979	3.6835	3.4628	3.4942	3.6845	3.4383	3.5128	3.5584	3.7551	3.7994	3.8104
pos_1313	metab_1300	metab_1300	-	-	553.26	0.7248	pos	-	-	-	-	-	-	0.0152	3.7508	4.6017	4.1733	3.3723	4.0831	3.6597	4.0725	4.3855	4.3128	3.9426	4.5968	4.0931	3.8557	4.4659	4.2973	4.3557	4.2037	4.7092	4.3792	4.5732	4.7486	4.694	4.4771	4.6646	4.0893	4.0795	4.4442	3.7791	3.9831	3.9418	3.9945	3.8684	4.2286	4.3032	4.1358
pos_1314	metab_1301	metab_1301	-	-	237.086	0.7248	pos	-	-	-	-	-	-	0.0053	3.6718	4.1851	4.0217	3.499	3.8023	3.2622	4.0205	4.0418	4.0107	3.7705	4.2005	3.7978	4.0173	4.5185	4.3224	4.3781	3.9191	4.1683	4.0915	4.1818	4.204	4.6563	4.0514	4.253	4.2319	4.6116	4.6039	4.3102	4.7086	4.5274	4.6332	4.5268	4.3734	4.3497	4.3325
pos_1315	metab_1302	metab_1302	-	-	176.037	0.7248	pos	-	-	-	-	-	-	0.0085	3.6087	3.6122	3.587	3.085	3.8377	2.8954	3.6519	3.7327	3.789	3.8131	3.7776	3.6382	3.7755	3.8486	3.8177	3.8439	3.8361	3.836	3.5704	3.8865	3.7988	2.7934	3.8834	3.7545	3.7549	4.0305	3.8753	3.8124	4.0752	3.8038	3.9732	3.9224	3.9305	3.8785	3.8627
pos_1316	metab_1303	metab_1303	-	-	156.138	0.7248	pos	-	-	-	-	-	-	0.009	3.9172	4.137	4.3186	3.5839	3.6202	3.7634	3.8348	3.7549	3.699	3.7985	3.9536	3.6114	3.8695	4.011	4.119	3.7636	3.8823	3.7559	3.5862	4.0219	4.1831	3.7813	3.3813	3.8249	4.1048	3.6697	3.756	3.783	3.8393	3.3779	3.6452	3.6748	3.9748	3.8799	3.9476
pos_1317	metab_1304	metab_1304	-	-	726.831	0.7248	pos	-	-	-	-	-	-	0.0237	3.2776	4.6562	4.4486	3.878	4.3296	3.4989	4.4162	4.3859	4.3817	3.8231	4.126	3.9915	4.3634	4.1634	4.2992	3.9746	4.4842	4.3703	4.5417	4.3869	4.9178	4.3854	4.6797	4.6114	4.6844	4.4283	4.6983	4.6737	4.5866	4.6708	4.6494	4.5263	4.4998	4.4045	4.4391
pos_1318	metab_1305	metab_1305	-	-	261.18	0.7248	pos	-	-	-	-	-	-	0.0137	3.0698	3.5984	3.7676	3.4464	3.8925	3.6992	3.3786	3.6419	4.076	3.6954	4.1493	4.3487	4.3554	4.5424	4.3201	4.4693	3.6468	3.5096	3.7211	3.8048	3.7924	3.4159	3.771	3.7149	3.6785	3.9915	3.7078	3.1763	3.8459	3.7261	3.799	3.8675	4.1015	4.0084	4.11
pos_1323	metab_1309	metab_1309	-	-	307.167	0.7248	pos	-	-	-	-	-	-	0.0014	2.7494	2.8584	2.7266	2.5956	2.671	2.6084	2.7466	2.8538	2.7439	2.7701	2.8944	2.6503	2.6775	2.9507	2.9325	2.94	2.7841	2.8192	2.8981	2.8792	2.8797	2.8896	2.7596	2.8956	4.0103	4.0155	3.8359	3.617	3.42	3.9515	3.9761	3.7532	2.9325	2.9225	2.9277
pos_1324	metab_1310	metab_1310	-	-	305.096	0.7248	pos	-	-	-	-	-	-	0.0132	3.3033	3.8702	3.5349	2.9689	3.6399	3.6314	3.6999	3.8508	3.9652	3.0963	3.7787	3.6289	3.2848	4.2224	3.7281	4.2371	3.781	4.0874	3.917	3.2055	4.0776	3.7759	3.7683	3.9979	3.8459	4.2275	3.7585	3.5889	4.0301	4.0808	4.1196	4.0601	3.8983	3.9841	3.9904
pos_1325	metab_1311	metab_1311	-	-	164.056	0.7248	pos	-	-	-	-	-	-	0.0015	3.9067	4.2043	4.0311	3.514	3.8939	3.468	4.0169	4.1278	4.072	4.0992	4.2112	3.8323	3.877	4.4293	4.2315	4.3625	4.116	4.1883	4.1848	4.3241	4.3837	4.4687	4.1381	4.3861	4.2338	4.4677	4.3911	4.0535	4.2986	4.2214	4.3527	4.2733	4.2175	4.2146	4.2259
pos_1326	metab_1312	metab_1312	-	-	252.089	0.7248	pos	-	-	-	-	-	-	0.0025	4.256	4.3324	4.3229	4.0086	4.3199	3.7541	4.3319	4.2395	4.1816	4.2985	4.2725	4.0807	4.0739	4.3776	4.2714	4.3366	4.315	4.2357	4.2386	4.4448	4.3413	4.2281	4.1819	4.3352	4.4118	4.4697	4.3756	4.4368	4.4649	4.4935	4.5433	4.4999	4.3335	4.3308	4.3569
pos_1327	metab_1313	metab_1313	-	-	147.044	0.7248	pos	-	-	-	-	-	-	0.0073	3.0972	3.6341	3.4505	3.146	3.0547	2.7856	3.5383	3.4537	3.5081	3.3858	3.6542	3.2624	3.2852	3.5268	3.5352	3.3627	3.1509	2.9981	3.5182	3.3468	3.6209	3.5237	3.6521	3.4525	3.7462	3.917	3.8787	3.6517	3.9341	3.7955	3.7417	3.7202	3.5571	3.5977	3.5263
pos_1328	metab_1314	metab_1314	-	-	243.161	0.7248	pos	-	-	-	-	-	-	0.0025	4.583	4.4079	4.27	3.9263	4.2204	4.2973	4.4264	4.3725	4.1918	4.3575	4.3709	4.2069	3.8501	4.432	4.4348	4.4149	4.3351	4.4433	4.4491	4.4812	4.2564	4.5308	4.2503	4.3216	4.2399	4.4674	4.3505	4.3294	4.4682	4.2335	4.3652	4.2957	4.3628	4.3918	4.3789
pos_1329	metab_1315	metab_1315	-	-	113.107	0.7248	pos	-	-	-	-	-	-	0.0045	4.0967	3.6152	4.0434	4.0045	4.2642	4.0441	4.0228	3.9785	3.8108	3.96	4.1844	3.9142	4.0009	3.6713	3.7504	3.6277	3.8806	4.1966	3.5406	3.8346	3.9286	3.4331	3.7615	3.7491	3.8528	3.45	3.509	3.8814	3.9181	3.7645	3.6144	3.6506	3.7568	3.7894	3.75
pos_1334	metab_1320	metab_1320	-	-	261.143	0.7248	pos	-	-	-	-	-	-	0.0095	4.116	4.2871	4.3512	4.0759	4.2409	3.8652	4.4022	4.326	4.2776	4.2049	4.2525	4.199	4.2802	4.3477	4.3222	4.2447	4.2475	4.2803	4.287	4.4339	4.4226	4.2871	4.2999	4.2626	4.1199	4.4044	4.2369	4.2862	4.4323	4.2986	4.287	4.3154	4.3363	4.2803	4.3807
pos_1335	metab_1321	metab_1321	-	-	174.054	0.7248	pos	-	-	-	-	-	-	0.0101	3.3114	3.1491	3.3947	3.1144	3.3887	3.176	3.5467	3.4968	3.6446	3.5616	3.7142	3.3056	3.2683	3.2107	3.5434	3.3661	3.3865	2.9634	3.683	2.8289	2.9595	2.2742	3.5623	3.4257	3.3797	3.859	3.7324	3.6974	3.9189	3.7323	3.7319	3.7177	3.5264	3.5184	3.5519
pos_1339	metab_1325	metab_1325	-	-	109.034	0.7608	pos	-	-	-	-	-	-	0.0068	4.2415	4.106	3.9744	3.9447	4.0863	3.9102	3.8787	4.1027	4.3131	4.2308	4.1614	3.9678	3.9214	3.9209	4.1324	4.0158	4.2045	4.2144	4.1666	4.109	3.9483	4.475	4.3004	4.031	3.8023	3.9132	3.9338	4.2125	4.1948	4.0669	4.0293	4.0767	4.1067	4.1583	4.1568
pos_1340	metab_1326	metab_1326	-	-	91.0235	0.7608	pos	-	-	-	-	-	-	0.0157	2.7445	2.9153	2.7374	2.7904	2.6357	2.5728	2.5374	2.69	2.404	2.4056	2.9117	2.4817	2.5965	2.9796	3.1129	3.0733	2.9311	3.1059	3.0912	3.0342	2.8629	3.0509	2.665	3.0739	2.3762	2.7293	2.893	2.5802	2.8518	2.8734	2.8523	2.7514	3.0022	2.9099	3.0201
pos_1341	metab_1327	metab_1327	-	-	144.034	0.7608	pos	-	-	-	-	-	-	0.0214	3.4529	3.3933	3.4762	3.3505	3.4208	3.2132	3.3675	3.4512	3.2715	3.2305	3.1844	3.3064	3.3886	3.4791	3.4004	3.4907	3.5032	3.5103	3.4112	3.3768	3.3189	3.178	3.4997	3.4146	2.9605	3.2733	3.341	3.3624	3.337	3.38	3.2964	3.3725	3.3255	3.4999	3.5065
pos_1342	metab_1328	metab_1328	-	-	88.5209	0.7815	pos	-	-	-	-	-	-	0.0075	4.0208	3.8356	4.0112	4.0417	4.0048	3.9507	3.9363	3.969	3.8908	3.9202	3.8406	3.9857	4.0469	3.9308	3.9032	3.9913	3.9956	3.9848	3.8882	3.9827	3.9195	3.8589	3.9825	3.8827	3.8139	3.874	3.8465	3.8933	3.839	3.909	3.866	3.865	3.9117	3.9734	3.9108
pos_1343	metab_1329	metab_1329	-	-	98.9866	0.7815	pos	-	-	-	-	-	-	0.0234	3.6084	3.4372	3.5501	3.7261	3.5318	3.747	3.4689	3.4868	3.2298	3.4283	3.333	3.5489	3.6591	3.5458	3.4795	3.4624	3.5568	3.558	3.5099	3.5163	3.3732	3.4947	3.5106	3.5206	3.0023	3.3388	3.4446	3.327	3.3612	3.331	3.3386	3.2351	3.2639	3.347	3.4083
pos_1344	metab_1330	metab_1330	-	-	195.968	0.7815	pos	-	-	-	-	-	-	0.0113	3.5401	2.2166	3.7815	3.9689	3.9241	3.9301	3.6345	3.2766	4.024	3.8395	3.3779	4.0289	3.9334	3.0239	3.1183	3.187	3.5696	2.1777	3.0447	3.2414	2.9444	2.2477	3.6994	3.2021	3.7582	2.3556	2.3352	3.3761	2.3646	3.4108	3.3828	3.1568	3.3124	3.3354	3.4134
pos_1345	metab_1331	metab_1331	-	-	195.958	0.8018	pos	-	-	-	-	-	-	0.005	4.4622	4.2171	4.476	4.5807	4.5606	4.4654	4.4975	4.2775	4.5174	4.4283	3.9705	4.5194	4.6004	3.6767	3.8807	3.9346	4.4197	3.9562	3.9513	4.2408	4.1234	2.9796	4.4456	4.0032	4.5833	2.9918	3.8618	4.4954	3.355	4.3981	4.2165	4.3215	4.147	4.1037	4.1079
pos_1346	metab_1332	metab_1332	-	-	196.953	0.8018	pos	-	-	-	-	-	-	0.0077	3.8268	3.8292	3.8544	3.6231	3.842	3.3233	3.8498	3.8239	3.7117	3.7098	3.3521	3.6317	3.7776	3.1323	3.5505	3.5213	3.9202	3.8378	3.815	3.8908	3.7774	2.2731	3.8661	3.7022	3.4386	2.7702	3.6573	3.8712	2.3901	3.8451	3.751	3.8445	3.6833	3.6815	3.7513
pos_1347	metab_1333	metab_1333	-	-	182.048	0.8018	pos	-	-	-	-	-	-	0.0286	2.576	3.1509	2.6161	1.5525	3.0642	2.2798	2.8256	2.8708	2.7602	2.7974	2.9763	2.8771	2.4798	2.9783	2.9415	3.3841	2.8963	3.2344	2.9946	2.9712	2.6849	3.2605	2.6163	2.8627	3.1112	3.0489	2.9936	2.9918	3.1185	2.1629	2.9543	2.9422	2.8565	2.9926	3.0969
pos_1348	metab_1334	metab_1334	-	-	155.985	0.8018	pos	-	-	-	-	-	-	0.0189	3.2444	2.9805	3.3107	2.9468	3.1133	2.5718	3.0018	3.1295	2.6671	2.9388	2.6752	2.9628	3.1436	3.2819	3.2602	3.1261	3.0699	3.2365	3.1975	3.3205	3.1209	3.3451	3.1289	3.1884	2.308	2.9117	3.3101	3.0113	3.0198	2.7367	2.9528	3.0962	3.1797	3.3236	3.2154
pos_1349	metab_1335	metab_1335	-	-	293.112	0.8219	pos	-	-	-	-	-	-	0.0071	3.6511	3.9622	3.4652	2.7946	3.4899	2.8075	3.6872	3.7641	3.5208	3.6305	3.9376	3.268	3.5129	3.7832	3.89	3.8349	3.925	3.7831	4.1901	3.9212	3.618	3.9094	3.5142	3.9683	3.8323	4.464	3.9612	4.1211	4.2003	4.1555	4.2285	4.1746	4.0698	4.0656	4.1324
pos_1351	metab_1336	metab_1336	-	-	230.151	0.8418	pos	-	-	-	-	-	-	0.0215	2.3625	2.8965	2.3398	2.2092	2.2844	2.222	3.0206	2.8632	2.9417	2.9725	3.1819	2.3585	2.8118	2.8905	2.5702	3.2946	2.8193	3.0419	3.3626	3.4221	3.4645	3.0647	3.0387	2.7794	3.215	3.2534	3.1874	2.7854	2.9307	3.2996	2.6224	3.3147	3.1405	3.0929	3.2129
pos_1352	metab_1337	metab_1337	-	-	109.048	0.8624	pos	-	-	-	-	-	-	0.0143	2.71	2.3223	2.5297	2.4556	2.4712	2.2777	2.408	2.6666	2.4626	2.6019	2.5684	2.3005	2.7377	2.9933	2.6221	2.9989	2.4777	2.5484	2.7169	2.6556	2.7918	1.9194	2.503	2.5707	2.7115	2.7488	2.8334	2.7788	2.5081	2.7127	2.7173	2.8395	2.8888	2.9025	2.9483
pos_1353	7-Aminomethyl-7-carbaguanine	metab_1338	HMDB0011690	C16675	180.087	0.8835	pos	M+H	C7H9N5O	-	51	-3.86908	-	0.0028	4.1284	4.2839	4.1556	3.9325	4.0395	3.8356	4.1296	4.2881	4.1331	4.2085	4.4473	4.1356	4.4794	4.5901	4.6118	4.5437	4.3196	4.3366	4.5404	4.3771	4.3163	6.0364	4.2312	4.3217	4.2432	4.2728	4.507	4.1527	4.6326	4.2859	4.4146	4.3805	4.9701	4.9788	5.0059
pos_1355	metab_1340	metab_1340	-	-	153.04	0.9239	pos	-	-	-	-	-	-	0.0038	4.6629	4.8397	4.559	4.1836	4.5528	4.067	4.6375	4.7833	4.7081	4.6989	4.8953	4.4533	4.3921	5.1725	5.0445	5.1776	4.7667	4.8911	5.0164	4.9178	4.9721	5.3831	4.7002	4.9981	4.708	5.2589	4.9261	4.7421	5.0363	4.8103	4.9064	4.8691	4.9889	4.9718	5.005
pos_1356	metab_1341	metab_1341	-	-	185.063	0.9239	pos	-	-	-	-	-	-	0.0027	4.5991	4.7481	4.5901	4.0189	4.537	3.8076	4.5976	4.7212	4.6326	4.6061	4.742	4.3344	4.5659	4.8035	4.7742	4.8806	4.6773	4.6693	4.8184	4.8118	4.7593	4.7457	4.5889	4.7613	4.7489	5.0418	4.7746	4.7843	4.8638	4.827	4.8678	4.8573	4.8067	4.8005	4.8015
pos_1357	metab_1342	metab_1342	-	-	285.082	0.9239	pos	-	-	-	-	-	-	0.0051	4.2898	4.4762	4.1426	3.8064	4.1481	3.6921	4.1795	4.3302	4.3153	4.2602	4.4797	4.08	4.0076	4.7797	4.6721	4.7262	4.3687	4.464	4.6397	4.473	4.5712	4.9362	4.2997	4.5753	4.3132	4.8527	4.4978	4.3071	4.6795	4.4198	4.5492	4.477	4.5713	4.5791	4.5487
pos_1358	metab_1343	metab_1343	-	-	159.112	0.9239	pos	-	-	-	-	-	-	0.004	4.0072	4.081	3.953	3.7545	3.7733	3.7263	3.8595	3.9857	3.9301	3.9719	4.0167	3.8652	3.946	3.9571	4.1324	4.1626	3.9712	4.2736	4.0643	4.091	3.9102	4.1572	3.8033	4.0608	4.1702	4.1856	4.2197	4.2685	4.4411	4.1567	4.2631	4.2212	4.138	4.1239	4.1592
pos_1359	Pantothenol	metab_1344	HMDB0004231;LMFA08020198	C05944	228.122	0.9239	pos	M+Na	C9H19NO4	-	55.5	7.6787	81-13-0	0.0023	4.8506	4.9875	4.8957	4.4513	4.9104	4.4675	4.9043	4.9279	4.8799	4.955	5.0693	4.7606	4.8507	5.2064	5.1485	5.1619	4.8799	5.0223	5.026	5.0083	5.129	4.9564	4.8677	5.1065	5.0243	5.2819	5.1326	5.0072	5.2356	5.1732	5.223	5.1893	5.0799	5.0881	5.0836
pos_1362	2-Pyrrolidinone	metab_1347	HMDB0002039	C11118	86.0603	0.9446	pos	M+H	C4H7NO	70	-	2.50236	616-45-5	0.0027	4.8665	4.8745	4.7888	4.5323	4.8103	4.4599	4.7446	4.8634	4.8156	4.8012	4.9222	4.6293	4.7051	5.039	4.9876	5.1608	4.8351	4.9488	5.1005	4.9749	4.8945	5.0353	4.8137	4.9626	4.9735	5.1833	4.9607	4.9177	5.1486	4.9529	5.0265	4.9977	5.0132	4.9931	5.0135
pos_1363	metab_1348	metab_1348	-	-	262.164	0.9446	pos	-	-	-	-	-	-	0.0038	4.3965	4.5469	4.3429	4.0844	4.4713	3.4806	4.3748	4.6308	4.2002	4.409	5.0565	4.0391	4.2588	4.9074	4.8244	4.9394	4.7442	5.0069	4.9018	4.763	4.6366	5.1445	4.2784	4.8212	4.802	5.1178	4.9739	4.4681	4.9983	4.6653	4.8585	4.7487	4.8157	4.8158	4.8325
pos_1364	metab_1349	metab_1349	-	-	131.07	0.9446	pos	-	-	-	-	-	-	0.0099	3.2142	2.9967	3.2964	3.3528	3.1871	3.3131	2.997	3.1659	3.1882	3.0303	3.141	3.3337	3.4036	3.2667	3.1747	3.3387	3.1118	3.0964	3.0308	3.1132	2.7618	2.9268	3.1725	3.0861	3.3674	3.3374	3.3178	3.336	3.3758	3.284	3.3892	3.2597	3.2594	3.232	3.1748
pos_1365	metab_1350	metab_1350	-	-	298.113	0.9656	pos	-	-	-	-	-	-	0.0018	5.267	5.4239	5.3211	5.0253	5.2749	4.9094	5.3071	5.4404	5.3991	5.4428	5.5723	5.2794	5.2699	5.6537	5.5821	5.6834	5.3848	5.6304	5.5826	5.6572	5.6775	4.8158	5.4115	5.6947	5.4038	5.8556	5.4954	5.3809	5.6564	5.4115	5.4893	5.4443	5.5315	5.5096	5.536
pos_1366	metab_1351	metab_1351	-	-	210.086	0.9656	pos	-	-	-	-	-	-	0.0022	3.6666	3.9026	3.9481	2.5734	3.515	2.5862	3.7064	3.9224	3.7041	3.7178	3.6627	2.6281	3.6305	3.8558	4.3555	4.212	3.8208	2.797	4.4033	4.0955	3.9614	4.2455	3.7275	3.998	4.056	4.1416	4.2937	3.8155	4.2537	4.2082	4.4544	4.4066	4.4939	4.4794	4.5069
pos_1367	metab_1352	metab_1352	-	-	109.04	0.9656	pos	-	-	-	-	-	-	0.0109	2.9697	3.1158	3.011	2.6156	2.8479	2.5205	2.9693	3.2431	3.1494	3.2457	3.158	3.1257	3.018	3.3182	3.3852	3.2853	3.2176	3.1974	3.2801	3.4484	3.4768	3.4502	3.2764	3.439	3.2127	3.3999	3.0027	3.1171	3.3347	3.1018	3.2216	2.9817	3.3075	3.3126	3.3246
pos_1368	metab_1353	metab_1353	-	-	318.154	0.9656	pos	-	-	-	-	-	-	0.0167	2.939	3.3314	3.0543	2.3487	2.424	2.3615	2.4994	2.9781	3.0695	3.147	2.6471	2.4033	2.997	3.9032	3.8271	3.9126	3.0831	3.3167	3.6289	3.4815	3.6277	3.7244	3.0821	3.6359	3.2119	3.9854	3.6304	3.3782	3.6866	3.5913	3.7011	3.6824	3.5531	3.5598	3.6809
pos_1369	metab_1354	metab_1354	-	-	468.729	0.9855	pos	-	-	-	-	-	-	0.0059	4.3074	4.5758	4.4854	3.7938	4.446	3.8955	4.5417	4.7887	4.561	4.6965	5.0202	4.4611	4.0165	4.5636	4.758	4.768	4.5877	4.9532	4.9577	4.9028	4.826	4.8427	4.7918	4.8513	4.213	4.2692	4.2265	4.0829	4.2686	3.8669	4.0475	3.9697	4.5547	4.5801	4.6115
pos_1370	metab_1355	metab_1355	-	-	310.175	0.9855	pos	-	-	-	-	-	-	0.0019	4.2854	5.6638	4.5582	3.7235	3.7051	2.6677	3.5838	5.0116	4.4441	4.9589	4.2567	4.9949	4.3312	4.5194	4.9669	4.8196	4.0518	4.948	5.0874	4.411	4.4123	4.1386	4.9187	4.6981	3.856	4.2452	4.4773	4.2923	4.3692	4.0492	4.1569	4.1965	4.8289	4.8311	4.8522
pos_1371	metab_1356	metab_1356	-	-	167.117	0.9855	pos	-	-	-	-	-	-	0.0037	3.0845	2.8575	2.94	2.6242	2.8479	2.837	2.746	3.0822	2.7137	3.01	3.3731	3.3141	3.2607	4.564	4.2541	4.5093	2.7482	3.0025	2.9114	2.9933	2.9664	3.3304	2.6467	2.7605	2.9077	3.5885	2.9995	2.7878	3.2587	3.0494	3.1644	3.038	3.7089	3.6728	3.6808
pos_1373	metab_1358	metab_1358	-	-	158.002	0.9855	pos	-	-	-	-	-	-	0.0038	4.586	4.2892	4.544	4.7701	4.6463	4.7787	4.5724	4.3866	4.5473	4.5191	4.3034	4.7126	4.6837	4.1241	4.1306	4.2575	4.4724	4.2242	4.1768	4.3289	4.2583	3.8547	4.5399	4.1641	4.5849	4.0776	4.1921	4.4965	4.2144	4.454	4.3584	4.3874	4.3546	4.3494	4.3162
pos_1374	metab_1359	metab_1359	-	-	392.191	1.0059	pos	-	-	-	-	-	-	0.0082	2.6628	3.8262	2.64	2.5091	2.9087	2.5219	2.9507	3.6269	3.4728	3.2805	4.0273	3.1688	3.4198	4.0565	4.0911	4.1919	3.2635	3.591	4.4962	3.9573	4.5201	4.2107	3.4839	4.4962	2.6914	4.3991	4.1586	2.7691	3.5635	3.6106	4.0171	3.8421	3.9834	3.9589	4.0031
pos_1375	metab_1360	metab_1360	-	-	127.123	1.0059	pos	-	-	-	-	-	-	0.0161	3.202	2.573	3.2807	2.8584	3.8215	2.8943	3.1566	3.4766	2.8068	3.1322	4.2304	2.7924	2.8599	2.5092	2.3276	2.2564	3.0896	4.0228	2.6673	3.2659	3.569	3.2783	3.0611	3.3404	2.8334	2.7866	2.8226	3.0323	3.2987	2.7518	2.8651	2.8064	2.9335	2.996	3.0209
pos_1376	metab_1361	metab_1361	-	-	216.133	1.0059	pos	-	-	-	-	-	-	0.0135	2.0506	2.159	2.028	2.2938	2.1923	1.9108	2.0479	2.1544	2.6713	2.5215	3.0827	2.7825	2.2384	3.8056	3.6482	3.8565	2.0851	2.12	2.1985	2.1797	2.1802	2.19	2.0607	2.1959	3.115	3.6945	3.5757	2.7839	3.5872	3.3502	3.3681	3.3168	3.3866	3.3386	3.2999
pos_1378	metab_1363	metab_1363	-	-	144.065	1.0266	pos	-	-	-	-	-	-	0.0009	5.1903	5.275	5.1113	4.8612	5.1078	4.789	5.1275	5.2422	5.1814	5.2091	5.3946	5.0965	5.0809	5.6299	5.5223	5.5729	5.2302	5.1922	5.4857	5.2877	5.1729	5.4874	5.1105	5.2809	5.27	5.5291	5.5498	5.3622	5.6157	5.3945	5.4677	5.4513	5.4331	5.4361	5.4431
pos_1379	metab_1364	metab_1364	-	-	215.048	1.0266	pos	-	-	-	-	-	-	0.0032	5.052	5.3429	5.258	4.2135	4.5651	4.4518	5.1411	5.3481	4.8865	5.0047	5.2711	4.8689	4.9036	5.2875	5.2934	5.2601	5.2334	5.3588	5.5082	5.251	4.7636	5.4703	5.0322	5.1995	5.1286	5.2939	5.2595	5.2883	4.9496	5.1236	5.1186	5.1364	5.2808	5.2573	5.2565
pos_1380	metab_1365	metab_1365	-	-	212.091	1.0266	pos	-	-	-	-	-	-	0.0026	4.2517	4.5184	4.123	3.8305	4.0993	3.8053	4.1893	4.3813	4.2413	4.1851	4.5422	3.994	4.053	4.4917	4.4508	4.5163	4.192	4.1113	4.6046	4.242	4.3677	4.7149	4.2168	4.44	4.1626	4.9576	4.6389	4.3631	4.7461	4.5065	4.6166	4.601	4.5167	4.5373	4.5128
pos_1381	N2-Acetyl-L-aminoadipate	metab_1366	-	C12986	204.086	1.0266	pos	M+H	C8H13NO5	57.9	-	-3.37549	-	0.0017	4.3391	4.4261	4.3145	3.9246	4.2163	3.7631	4.2945	4.3989	4.254	4.4598	4.4178	4.1538	4.2223	4.8044	4.7149	4.8015	4.3817	4.7239	4.5561	4.6512	4.7644	4.828	4.4209	4.702	4.3446	4.8236	4.5158	4.3929	4.5726	4.5554	4.6263	4.5826	4.6445	4.6323	4.6473
pos_1382	metab_1367	metab_1367	-	-	132.065	1.0266	pos	-	-	-	-	-	-	0.0047	3.7475	4.0774	3.7708	3.4335	3.6943	3.4688	3.7626	3.9691	3.8957	3.9459	4.1384	3.7173	3.5443	4.0792	4.1791	4.1421	3.9375	4.2693	4.1989	4.1637	4.2234	4.2158	3.8595	4.2363	3.8337	3.9906	3.8068	3.7289	3.8437	3.7081	3.7591	3.6463	3.9882	3.9783	4.0025
pos_1383	metab_1368	metab_1368	-	-	363.211	1.0266	pos	-	-	-	-	-	-	0.0018	3.5016	3.8125	3.486	2.7532	3.1854	2.7661	4.0642	3.9991	4.3308	3.8806	4.1508	3.1564	3.32	4.4855	4.2815	4.4734	3.912	3.908	4.0432	3.9506	4.4431	4.3589	3.656	4.4002	3.7756	4.7704	3.9218	3.8774	4.2115	4.1494	4.241	4.2058	4.2564	4.2507	4.247
pos_1384	metab_1369	metab_1369	-	-	273.155	1.0266	pos	-	-	-	-	-	-	0.0006	3.7458	3.9042	3.5383	1.5556	3.3462	1.5681	3.6631	4.32	3.8713	3.8337	4.1465	1.609	2.5875	3.6589	3.9187	3.2414	3.9231	4.1466	3.6896	4.3175	4.3309	3.4154	3.9981	4.2883	3.3262	3.0011	4.144	4.0035	4.6357	3.7585	4.1644	4.037	4.0029	4.0006	4.0075
pos_1385	metab_1370	metab_1370	-	-	157.049	1.0266	pos	-	-	-	-	-	-	0.0111	3.0284	3.1766	2.7704	3.0265	3.0638	2.9264	3.051	3.0696	3.1968	3.107	3.2452	3.1337	3.1735	3.7084	3.5673	3.7481	2.4673	2.6899	2.968	2.9412	2.5518	3.2571	2.951	2.7988	2.9082	3.3595	3.0527	2.9054	3.2425	2.9469	3.1031	3.0202	3.2558	3.2495	3.2937
pos_1386	metab_1371	metab_1371	-	-	322.091	1.0484	pos	-	-	-	-	-	-	0.0011	5.5599	5.8866	5.6608	4.564	4.7901	4.4717	5.348	5.9064	5.5811	5.633	5.9333	4.9939	5.3397	5.656	5.7341	5.8128	6.0014	5.6231	6.1198	5.3193	5.9781	2.6566	5.89	5.9995	5.095	5.8487	5.5836	5.5551	4.4936	5.2691	5.2426	5.2878	5.7388	5.7237	5.7305
pos_1387	metab_1372	metab_1372	-	-	210.112	1.0484	pos	-	-	-	-	-	-	0.0018	4.187	4.4267	4.1963	3.654	4.0475	3.6086	4.2046	4.3674	4.0205	4.2486	4.5319	3.9172	4.0621	4.8425	4.7338	4.8305	4.2383	4.535	4.6962	4.4061	4.5603	5.1578	4.1622	4.5651	4.0852	4.702	4.564	4.2397	4.7395	4.3325	4.4267	4.4375	4.5981	4.6209	4.609
pos_1388	metab_1373	metab_1373	-	-	231.169	1.0484	pos	-	-	-	-	-	-	0.006	2.797	3.6216	3.1102	1.9222	3.4262	2.1558	3.1519	3.4722	3.3384	3.1122	3.6816	2.7397	2.7603	3.5895	3.502	3.7322	3.7345	3.8041	3.8491	3.731	4.3974	4.0238	3.2174	4.2785	3.2312	4.0209	3.5284	3.4379	3.7751	3.4304	3.5776	3.5806	3.7693	3.7221	3.7116
pos_1389	metab_1374	metab_1374	-	-	238.106	1.0484	pos	-	-	-	-	-	-	0.0036	2.909	3.5186	2.8573	2.4624	2.5798	2.4322	2.535	3.0464	3.0767	2.4764	3.5288	2.6071	3.0061	3.8974	3.4782	3.7894	2.7772	3.3281	3.4325	2.6538	3.2496	3.94	2.358	3.3268	3.443	4.4524	3.8956	3.6868	4.0968	3.8509	3.9523	3.9701	3.6866	3.7012	3.7141
pos_1390	metab_1375	metab_1375	-	-	290.133	1.0484	pos	-	-	-	-	-	-	0.0104	3.164	3.5715	3.2317	2.368	3.1485	2.3808	3.2008	3.4704	3.0996	3.1952	3.6519	2.9807	2.9709	3.7388	3.7021	3.9277	3.4837	3.706	3.668	3.6423	3.664	3.9686	3.2717	3.6263	3.2792	4.0438	3.6249	3.4725	3.8017	3.54	3.7181	3.5651	3.6606	3.7454	3.6489
pos_1391	metab_1376	metab_1376	-	-	109.028	1.0484	pos	-	-	-	-	-	-	0.0053	3.7965	3.814	3.7707	3.7352	3.772	3.7907	3.7653	3.7706	3.8144	3.7892	3.7919	3.7018	3.6819	3.7697	3.782	3.8008	3.7372	3.6003	3.8325	3.7721	3.7156	3.2182	3.7979	3.7121	4.1072	4.1566	4.2668	4.0672	4.3166	4.1643	4.2142	4.1888	3.9393	3.9432	3.8909
pos_1392	metab_1377	metab_1377	-	-	194.065	1.0484	pos	-	-	-	-	-	-	0.0348	1.7761	1.8837	1.7536	1.6251	2.1945	1.6376	1.7734	1.8791	1.7707	1.7965	1.9193	1.6787	1.7054	3.0541	2.7001	3.1575	1.8104	1.845	2.2569	1.9043	1.9048	1.9474	1.7861	1.9204	3.2505	3.7287	3.6182	3.1925	3.6605	3.3053	3.4956	3.5104	2.8749	2.6667	2.6758
pos_1393	metab_1378	metab_1378	-	-	260.112	1.0684	pos	-	-	-	-	-	-	0.0098	3.1457	3.2219	3.1968	2.3509	2.9547	2.3637	3.0581	3.2524	2.9718	3.1774	3.2265	2.4055	2.7892	3.6545	3.4458	3.6141	3.0366	3.3517	3.4122	3.5919	3.4923	3.5749	2.8976	3.4653	2.8984	3.7755	3.4422	3.1144	3.6366	3.5539	3.5552	3.4856	3.4588	3.4991	3.4631
pos_1394	metab_1379	metab_1379	-	-	155.044	1.0684	pos	-	-	-	-	-	-	0.0146	3.4926	3.3719	3.4421	3.3129	3.4291	3.2922	3.4576	3.3409	3.4521	3.305	3.3978	3.3326	3.4557	3.2033	3.1825	3.2106	3.3837	3.1478	3.3502	3.2909	3.2229	3.3049	3.4912	3.2334	3.3896	3.3698	3.2979	3.5016	3.4162	3.4972	3.4272	3.5027	3.3115	3.3452	3.22
pos_1395	metab_1380	metab_1380	-	-	200.073	1.0684	pos	-	-	-	-	-	-	0.0285	1.929	2.4907	1.9064	1.777	2.0332	1.7897	2.1108	2.0325	1.9236	1.9495	3.0585	1.8311	1.8579	3.0294	2.871	2.9251	2.5254	3.3257	2.392	2.549	3.2134	3.7864	1.9391	2.5595	1.9573	2.8434	2.1553	2.9259	3.3048	2.4972	2.6185	2.4257	3.0634	2.9447	3.1179
pos_1396	metab_1381	metab_1381	-	-	211.071	1.0902	pos	-	-	-	-	-	-	0.0009	4.249	4.4298	4.5382	3.7772	4.2198	3.6795	4.3804	4.524	4.1662	4.4201	4.4925	4.0462	4.5346	5.0227	4.8134	5.0494	4.3956	4.608	4.8387	4.7413	4.6427	4.7938	4.4455	4.7119	4.4736	5.226	4.8513	4.7603	4.9569	4.794	4.8578	4.8624	4.7992	4.7946	4.8039
[truncated: 3,406 more rows]
[truncated: 1 more columns]
